# Supplementary material for: Asymmetric synthesis of stereogenic-at-sulfur compounds via biocatalytic oxidation with Unspecific Peroxygenases
Source: Research Square preprint supplement (doi:10.21203/rs.3.rs-7185896/v1), 2025-08-22
Supplement: Supplementary file 1 [file c73579b0735fb6f5af499395.pdf]

## **Supplementary Information**

### **Table of Contents**

|                                                                   |           |
|-------------------------------------------------------------------|-----------|
| 1) General Information                                            | S2        |
| 2) Experimental Procedures                                        | S3–S10    |
| 3) Compound data                                                  | S11–S68   |
| 4) Enzyme production                                              | S68       |
| 5) HPLC data                                                      | S69–S101  |
| 6) Molecular Docking                                              | S102      |
| 7) $^1\text{H}$ , $^{13}\text{C}$ and $^{19}\text{F}$ NMR spectra | S103–S202 |
| 8) References                                                     | S203–S206 |

## **1. General Information**

All reactions were performed in oven-dried glassware under a nitrogen atmosphere. Unless specified, all reagents and starting materials were purchased from commercial companies and used as received. Anhydrous solvents were freshly obtained from pure solvent system following standard procedures. Analytical thin layer chromatography (TLC) was performed using pre-coated silica gel plates. A Razel A 99 syringe pump was used for the slow addition of solutions. Visualisation was achieved by UV light (254 nm) or KMnO<sub>4</sub> and vanillin as stain. Flash chromatography was performed using silica gel and gradient solvent system (eluent: hexane: ethyl acetate/hexane: DCM). <sup>1</sup>H and <sup>13</sup>C NMR spectra were recorded on 400MHz Jeol ECS and Bruker AV and AM spectrometers. Chemical shifts (ppm) were recorded with tetramethylsilane (TMS) as the internal reference standard. Multiplicities are given as: s (singlet), br s (broad singlet), d (doublet), t (triplet), dd (doublet of doublets), dt (doublet of triplets), ddd (doublet of doublet of doublets), ddt (doublet of doublet of triplets), dtt (doublet of triplet of triplets), ddq (doublet of doublet of quintets), dddd (doublet of doublet of doublet of doublets), dtd (doublet of triplet of doublets), dt (doublet of triplets), dp (doublet of pentets), dq (doublet of quintets), td (triplet of doublets), tdd (triplet of doublet of doublets), tt (triplet of triplets), qd (quintet of doublets), qt (quintet of triplets) or m (multiplet). The number of protons (*n*) for a given resonance is indicated by *n*H and coupling constants are reported as a *J* value in Hz. Enantiomeric excess values were measured by an Agilent 1200 series HPLC. Unless stated otherwise, all chiral HPLC runs were carried out at 20 °C. High resolution mass spectra (HRMS) were obtained on a LC/HRMS TOF spectrometer using simultaneous electrospray (ESI).

## 2. Experimental Procedures

### General Procedure 2.1

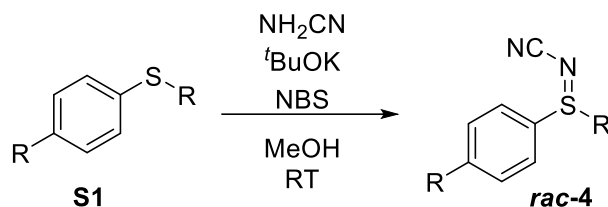

Adapted from Mancheno *et al.* <sup>[1]</sup> To a stirring solution of sulfide (4.08 mmol) in MeOH (10.0 mL) was added  $\text{NH}_2\text{CN}$  (2.00 eq.). Following this was added  $t\text{BuOK}$  (1.70 eq.) portion-wise followed by addition of NBS (1.30 eq.). The reaction was allowed to stir overnight. The solvent was removed *in vacuo* and the crude dissolved in saturated  $\text{Na}_2\text{S}_2\text{O}_3$  (10 mL) which was extracted with EtOAc (3 x 30 mL), and the combined organic phase washed with saturated brine (30 mL), dried over  $\text{MgSO}_4$ , filtered, and the solvent removed *in vacuo* to afford the crude. Purification was *via* done flash column chromatography on silica gel.

### General Procedure 2.2

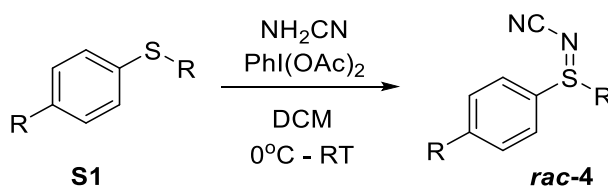

To a stirring solution of sulfide (4.08 mmol) and  $\text{NH}_2\text{CN}$  (2.00 eq.) in DCM (20.0 mL) at  $0^\circ\text{C}$  were added  $\text{PhI}(\text{OAc})_2$  (1.10 eq.), after which the temperature was raised to RT. After stirring overnight, the solvent was removed *in vacuo* and the crude material dissolved in saturated  $\text{Na}_2\text{S}_2\text{O}_3$  (10 mL). Following extraction with EtOAc (3 x 30 mL), the combined organic phase washed with saturated brine (30 mL), dried over  $\text{MgSO}_4$ , filtered, and the solvent removed *in vacuo*. Purification was done *via* flash column chromatography on silica gel.

## 2.3 Synthesis of Racemic Sulfoximine Standards

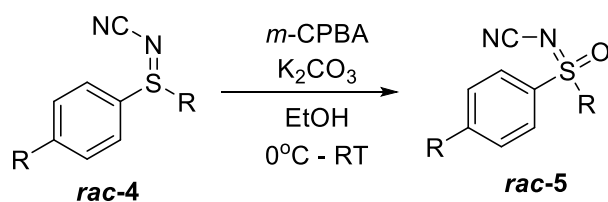

To a stirring solution of sulfilimine (0.600 mmol) in EtOH (5.00 mL) at 0 °C were added K<sub>2</sub>CO<sub>3</sub> (3.00 eq.) followed by *m*-CPBA (2.00 eq.) before raising the reaction to RT. After overnight stirring, the solvent was removed *in vacuo* to afford a white solid, which was dissolved in saturated aq. Na<sub>2</sub>S<sub>2</sub>O<sub>3</sub> (10 mL) and extracted with EtOAc (3 x 30 mL). The combined organic phase was washed with saturated brine (50 mL), dried over MgSO<sub>4</sub>, filtered and the solvent removed *in vacuo* to afford crude material which was purified, where required, *via* flash column chromatography on silica gel.

## 2.4 General Procedure for 0.3 mmol artUPO Kinetic Resolution of Sulfilimines 4

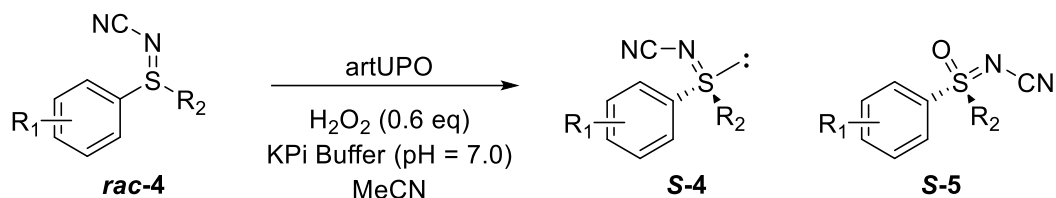

Liquid artUPO secretate (1.00 mL, 0.8 U/mL) was added to KPi Buffer (24.0 mL, pH 7.00) at RT and stirred for five min, after which, a solution of sulfilimine (0.3 mmol) in MeCN (6.00 mL) was added. The reaction was initiated by the slow continuous addition of a H<sub>2</sub>O<sub>2</sub> solution (0.180 mmol in 2 mL H<sub>2</sub>O) over 4 h followed by stirring overnight. The reaction was extracted with Et<sub>2</sub>O (3 x 30 mL), and the combined organic phase washed with saturated brine (40 mL), dried over MgSO<sub>4</sub>, filtered and the solvent removed *in vacuo* to afford the crude. For preparative reactions, the purified product were isolated following flash column chromatography on silica gel.



## 2.5 General Procedure for $\approx 1.0$ mmol artUPO Kinetic Resolution of Sulfilimines 4

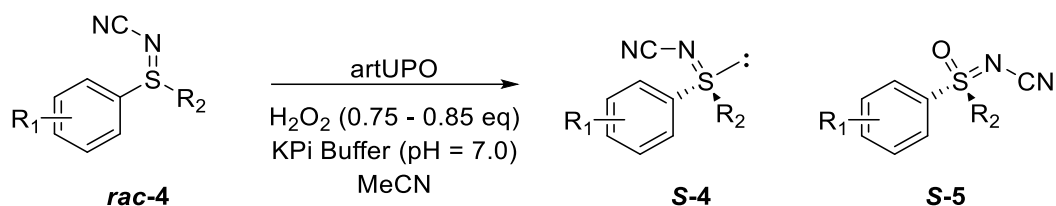

Liquid artUPO secretate (2.50 mL, 0.8 U/mL) was added to KPi Buffer (40.0 mL, pH 7.0) at RT and stirred for five min, after which, a solution of sulfilimine (1.00 mmol) in MeCN (10.0 mL) was added. The reaction was initiated by the slow continuous addition of a H<sub>2</sub>O<sub>2</sub> solution (0.600–0.800 mmol in 2.00 mL H<sub>2</sub>O, see below for specific amounts for individual substrates) over 4 h. After H<sub>2</sub>O<sub>2</sub> addition was complete, a sample of the reaction mixture (1.00 mL) was subjected to standard aqueous work-up (extract with EtOAc, wash with brine) before analysis of the resulting sample using <sup>1</sup>H NMR to measure conversion. If 50% conversion was not observed, a further 0.05–0.15 equivalents of H<sub>2</sub>O<sub>2</sub> was added over 1 h, before re-analysing as described above. When 50% conversion was reached, the reaction was extracted with Et<sub>2</sub>O (3 x 30 mL), and the combined organic phase washed with saturated brine (40 mL), dried over MgSO<sub>4</sub>, filtered and the solvent removed *in vacuo* to afford the crude. Purified products for preparative reactions were isolated following flash column chromatography on silica gel.

### H<sub>2</sub>O<sub>2</sub> quantities used for scale ups:

**rac-4b:** Initial H<sub>2</sub>O<sub>2</sub> infusion of 0.60 equiv., followed by an additional 0.10 equiv. H<sub>2</sub>O<sub>2</sub> infusion. 1.07 mmol scale.

**rac-4e:** Initial H<sub>2</sub>O<sub>2</sub> infusion of 0.65 equiv., followed by an additional 0.15 mmol H<sub>2</sub>O<sub>2</sub> infusion. 1.20 mmol scale.

**rac-4j:** Initial H<sub>2</sub>O<sub>2</sub> infusion of 0.70 equiv. No additional H<sub>2</sub>O<sub>2</sub> infusion. 1.00 mmol scale.

**rac-4t:** Initial H<sub>2</sub>O<sub>2</sub> infusion of 0.75 equiv., followed by an additional 0.05 equiv. H<sub>2</sub>O<sub>2</sub> infusion. 1.07 mmol scale.

**rac-4u:** Initial H<sub>2</sub>O<sub>2</sub> infusion of 0.80 equiv. No additional H<sub>2</sub>O<sub>2</sub> infusion. 1.00 mmol scale.

## 2.6. Screening for UPOs

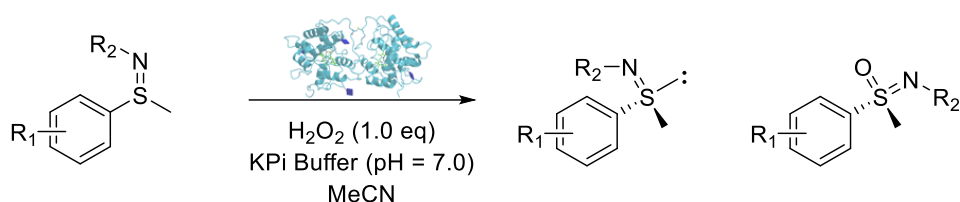

In order to investigate the feasibility of successfully sulfilimine oxidation by UPOs, we first synthesised three substrates to test for activity. Unless otherwise specified, the reactions were carried out following general procedure **2.4** with 0.2 mmol substrate. Unless otherwise specified, conversion was determined by comparing the intensity of the methyl peaks of the sulfilimine and sulfoximine in the  $^1\text{H}$  NMR spectra of the crude material.

| Entry | R <sub>1</sub> | R <sub>2</sub>      | Conversion (%)        |                     |
|-------|----------------|---------------------|-----------------------|---------------------|
|       |                |                     | <i>rAaeUPO-PaDa-I</i> | <b>art-UPO</b>      |
| 1     | H              | CN                  | 11                    | 39                  |
| 2     | H              | C(O)CF <sub>3</sub> | 0                     | 14                  |
| 3     | 4-MeO          | CN                  | 11                    | 65 <sup>[a,b]</sup> |

<sup>[a]</sup> Reaction carried out on a 60 mL scale with 0.6 mmol substrate

<sup>[b]</sup> Isolated yield following purification via flash chromatography on silica gel

## 2.7 General procedure for the synthesis of *i*-Pr *N*-sulfenylimines (**6**) <sup>[2]</sup>

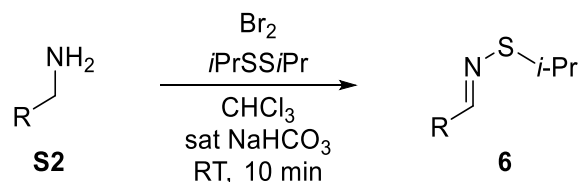

To a round bottom flask containing a magnetic stirring bar was added the appropriate amine **S1** (6 mmol, 3.0 equiv.) and diisopropyl disulfide (2 mmol, 0.34 mL, 1.0 equiv.) in  $\text{CHCl}_3$  (24 mL) and sat. aq.  $\text{NaHCO}_3$  (40 mL). The resulting reaction mixture was stirred vigorously by adding  $\text{Br}_2$  (10 mmol, 0.52 mL, 5.0 equiv.) solution in DCM (4 mL) slowly. After the addition,

the reaction mixture was stirred at room temperature for a further 10 min, open to air. Upon completion (a colour change to light yellow was noted), the reaction mixture was quenched by the addition of saturated aq. Na<sub>2</sub>S<sub>2</sub>O<sub>3</sub> (30 mL). The reaction mixture was then extracted with DCM (3 × 20 mL). The combined organic phases were washed with brine (20 mL), dried over anhydrous MgSO<sub>4</sub> and concentrated *in vacuo* to give a residue that was purified by flash column chromatography on silica gel (eluent specified later for each compound) to give the corresponding *N*-sulfenylimines (**1**).

## 2.8 General procedure for the synthesis of *t*-Bu *N*-sulfenylimines (**6**)<sup>[3]</sup>

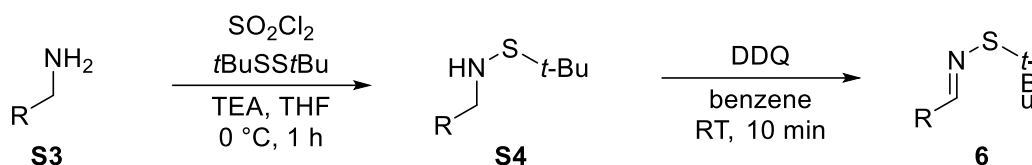

To a flame dried round bottom flask containing a magnetic stirring bar was added the di-*t*-butyl disulfide (5 mmol, 1.0 mL, 1.0 equiv.) anhydrous THF (40 mL) at 0 °C under an argon atmosphere. The sulfonyl dichloride (5.5 mmol, 0.45 mL, 1.1 equiv.) was added slowly and the resulting reaction mixture was stirred at the same temperature for 30 min. Upon completion, the solution was slowly transferred to another flame dried round bottom flask containing the appropriate amine **S2** (10 mmol, 2.0 equiv.) and TEA (15 mmol, 2.0 mL, 3.0 equiv.) in anhydrous THF (20 mL) at 0 °C. The resulting mixture was stirred at the same temperature for another 30 min. On completion, the reaction mixture was filtrated through a pad of Celite and rinsed with EtOAc (10 mL). The filtrate was concentrated under reduced pressure to give a residue that was purified by flash column chromatography on silica gel to give the corresponding compound **S3**.

To a flame dried round bottom flask containing a magnetic stirring bar was added **S3** (1.0 equiv.) in anhydrous benzene (10 mL) under an argon atmosphere. DDQ (1.1 equiv.) was added to the solution in one portion and the resulting mixture was stirred at room temperature for 10

min. Upon completion, the reaction was quenched by the addition of saturated aq. NaHCO<sub>3</sub> (50 mL). The reaction mixture was then extracted with DCM (3 × 20 mL). The combined organic phases were washed with water (50 mL) and brine (20 mL), dried over anhydrous MgSO<sub>4</sub> and concentrated *in vacuo* to give a residue that was purified by flash column chromatography on silica gel (eluent specified later for each compound) to give the corresponding *N*-sulfenylimines (**6**).

## 2.9 General procedure for the *rAae*UPO biotransformations with *i*-Pr *N*-sulfenylimines

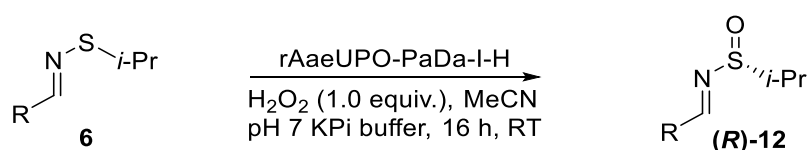

To a round bottom flask containing a magnetic stirring bar was added *rAae*UPO-PaDa-I-H (1.3 mL, 57 U/mL) and KPi buffer (10 mL, 0.1 mmol/mL, pH = 7, 10 mL). The solution was diluted by the addition of deionised water (2.7 mL), followed by addition of the appropriate *i*-Pr *N*-sulfenylimines **6** (0.2 mmol, 1.0 equiv.) in MeCN (4 mL). Next, H<sub>2</sub>O<sub>2</sub> solution (2 mL, 0.1 mmol/mL, 1.0 equiv.) was added over a 10 h period, using a syringe pump. After the H<sub>2</sub>O<sub>2</sub> addition was complete, the reaction was then stirred at room temperature for a further 6 h. The reaction mixture was then extracted with ethyl acetate (3 × 20 mL). The combined organic phases were then washed with brine (20 mL), dried over anhydrous MgSO<sub>4</sub> and concentrated *in vacuo* to give the crude product mixture, which was purified by flash column chromatography on silica gel (eluent: specified later for each compound) to provide the corresponding *N*-sulfinyl imine product (**(R)-12**).

## 2.10 General procedure for the artUPO biotransformations with *t*-Bu *N*-sulfenylimines

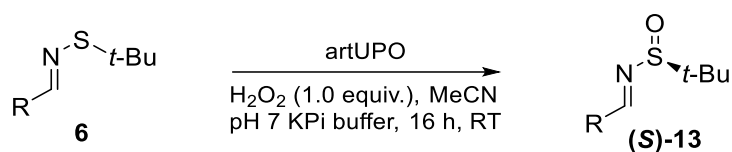

To a round bottom flask containing a magnetic stirring bar was added liquid artUPO secretate (1.0 mL, 0.8 U/mL) and KPi buffer (100 mM, pH = 7, 10 mL). The solution was diluted by the addition of deionised water (3 mL), followed by addition of the appropriate *t*-Bu *N*-sulfenylimine **6** (0.2 mmol, 1.0 equiv., final concentration 10 mM) in MeCN (4 mL). Next, 2 mL of a 100 mM H<sub>2</sub>O<sub>2</sub> solution (prepared from 22  $\mu$ L 30% H<sub>2</sub>O<sub>2</sub> in 2 mL deionised water) was added over a 10 h period, using a syringe pump. After the H<sub>2</sub>O<sub>2</sub> addition was complete, the reaction was then stirred at room temperature for a further 6 h. The reaction mixture was then extracted with ethyl acetate (3  $\times$  20 mL). The combined organic phases were then washed with brine (20 mL), dried over anhydrous MgSO<sub>4</sub> and concentrated *in vacuo* to give the crude product mixture, which was purified by flash column chromatography on silica gel (eluent: specified later for each compound) to provide the corresponding *N*-sulfinyl imine product **(S)-13**.

## 2.11 Racemic *N*-sulfinyl imine synthesis <sup>[4]</sup>

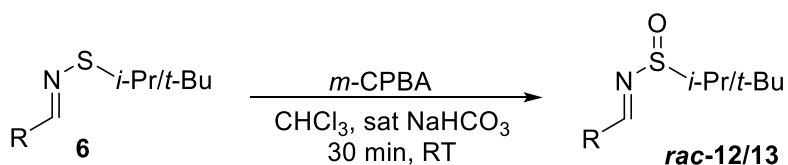

To a round bottom flask containing a magnetic stirring bar was added corresponding *N*-sulfenylimines (0.1 mmol, 1.0 equiv.) in CHCl<sub>3</sub> (3 mL), which was followed by the addition of sat NaHCO<sub>3</sub> (0.4 mL) and *m*-CPBA (25 mg, 0.11 mmol, 1.1 equiv.) in one portion and the resulting reaction mixture was stirred at room temperature for 30 min. Upon completion, the reaction mixture was quenched by adding excess neat KOH and dried over anhydrous MgSO<sub>4</sub> which was then filtered and concentrated *in vacuo* to give the crude product mixture. The

products afforded were of sufficient purity to be used as standards for HPLC analysis without additional purification.

### 3. Compound data

#### ***N*-(cyano) methyl phenyl sulfilimine (4a) <sup>[1]</sup>**

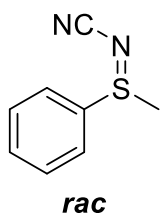

Synthesised from phenyl methyl sulfane using general procedure **2.1**.

Purification via flash chromatography on silica gel (eluent: hexane: EtOAc =

2:3). Data for **4a**: as a yellow oil (0.560 g, 84% yield); <sup>1</sup>H NMR (400 MHz,

*chloroform-d*) δ 7.82 – 7.78 (m, 2H), 7.66 – 7.58 (m, 3H), 3.02 (s, 3H); <sup>13</sup>C NMR (101 MHz,

*chloroform-d*) δ 136.3, 133.3, 130.5, 126.1, 120.4, 36.6.

#### ***N*-(cyano) methyl 4-methoxyphenyl sulfilimine (4b) <sup>[1]</sup>**

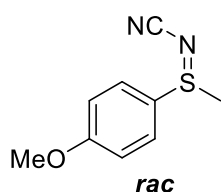

Synthesised from (4-methoxyphenyl)(methyl)sulfane using general

procedure **2.1**. Purification via flash chromatography on silica gel (eluent:

EtOAc: MeOH = 19:1). Data for **4b**: as a white solid (0.630 g, 80% yield);

<sup>1</sup>H NMR (400 MHz, *chloroform-d*) δ 7.78 – 7.69 (m, 2H), 7.11 – 7.02 (m, 2H), 3.86 (s, 3H),

3.00 (s, 3H); <sup>13</sup>C NMR (101 MHz, *chloroform-d*) δ 163.7, 128.5, 126.7, 120.6, 115.8, 55.9,

36.2; HRMS (ESI, m/z) m/z calculated for C<sub>9</sub>H<sub>10</sub>N<sub>2</sub>NaOS (MNa)<sup>+</sup> 217.0407, found 217.0412.

#### ***N*-(cyano) methyl 3-methoxyphenyl sulfilimine (4c)**

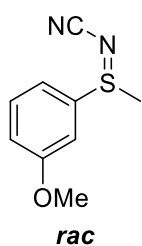

Synthesised from (3-methoxyphenyl) (methyl)sulfane using general procedure

**2.1**. Purification via flash column chromatography on silica gel (eluent: hexane:

EtOAc = 4:1); as a light yellow oil (0.500 g, 63 % Yield); <sup>1</sup>H NMR (400 MHz,

*chloroform-d*) δ 7.47 (t, *J* = 8.0 Hz, 1H), 7.37 – 7.24 (m, 2H), 7.15 – 7.08 (m, 1H),

3.87 (s, 2H), 2.99 (s, 3H); <sup>13</sup>C NMR (101 MHz, *chloroform-d*) δ 160.9, 137.4, 131.4, 120.5,

119.4, 117.9, 110.5, 55.9, 36.9; HRMS (ESI, m/z) m/z calculated for C<sub>9</sub>H<sub>10</sub>N<sub>2</sub>NaOS (MNa)<sup>+</sup>

217.0412, found 217.0399; IR film: ν<sub>max</sub>/cm<sup>-1</sup> 3007, 2141 (C≡N stretch), 1593, 1481, 1241,

1148, 1029, 760, 680.

***N*-(cyano) methyl 4-chlorophenyl sulfilimine (4d) <sup>[5]</sup>**

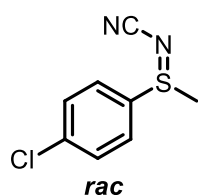

Synthesised from (4-chlorophenyl) (methyl) sulfane using general procedure

**2.1.** Purification via flash column chromatography on silica gel (eluent:

hexane: EtOAc = 3:7); as a white solid (0.320 g, 40% Yield); <sup>1</sup>H NMR (400

MHz, *chloroform-d*) δ 7.78 – 7.72 (m, 2H), 7.62 – 7.57 (m, 2H), 3.02 (s, 3H); <sup>13</sup>C NMR (101

MHz, *chloroform-d*) δ 140.0, 134.8, 130.8, 127.5, 36.8; HRMS (ESI, m/z) m/z calculated for

C<sub>8</sub>H<sub>7</sub><sup>35</sup>ClN<sub>2</sub>NaS (MNa)<sup>+</sup> 220.9916, found 220.9914.

***N*-(cyano) methyl 4-trifluorophenyl sulfilimine (4e) <sup>[6]</sup>**

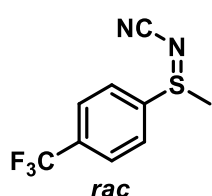

Synthesised from (4-(trifluoromethyl) phenyl) (methyl) sulfane using general

procedure **2.1.** Purification via flash chromatography on silica gel (eluent:

hexane: EtOAc = 2: 3); as a yellow oil (0.700 g, 74 % Yield); <sup>1</sup>H NMR (400

MHz, *chloroform-d*) δ 7.95 (d, *J* = 8.7 Hz, 2H), 7.89 (d, *J* = 8.7 Hz, 2H), 3.07 (s, 3H); <sup>13</sup>C

NMR (151 MHz, *Chloroform-d*) δ 140.5, 135.1 (q, *J* = 33.5 Hz), 127.4 (q, *J* = 3.8 Hz), 126.4,

123.0 (q, *J* = 273.4 Hz), 119.6, 36.8; <sup>19</sup>F NMR (376 MHz, *chloroform-d*) δ –63.09; HRMS

(ESI, m/z) m/z calculated for C<sub>9</sub>H<sub>7</sub>F<sub>3</sub>N<sub>2</sub>NaS (MNa)<sup>+</sup> 255.0180, found 255.0181.

***N*-(cyano) methyl 4-cyanophenyl sulfilimine (4f) <sup>[7]</sup>**

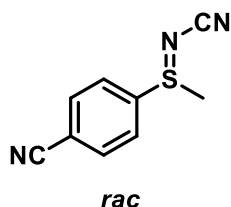

Synthesised from (4-cyanophenyl) (methyl) sulfane using general

procedure **2.1.** Purification via flash chromatography on silica gel (eluent:

hexane: EtOAc = 3:7); as a white solid (0.640 g, 83% yield); <sup>1</sup>H NMR

(400 MHz, *chloroform-d*) δ 7.96 – 7.88 (m, 4H), 3.06 (s, 3H); <sup>13</sup>C NMR

(101 MHz, *chloroform-d*) δ <sup>13</sup>C NMR (101 MHz, CHLOROFORM-D) δ 141.5, 134.0, 126.7,

119.6, 117.0, 117.0, 37.0.



#### ***N*-(cyano) methyl 4-methylphenyl sulfilimine (4g)**

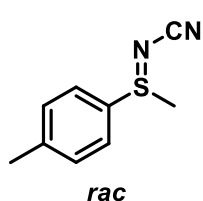

Synthesised from p-tolyl sulfane using general procedure **2.1**. Purification via flash chromatography on silica gel (eluent: hexane: EtOAc = 7:11); as a white solid (0.580 g, 80% Yield); Mp = 86 – 89 °C; <sup>1</sup>H NMR (400 MHz, *chloroform-d*) δ 7.71 – 7.64 (m, 2H), 7.43 – 7.35 (m, 2H), 3.00 (s, 3H), 2.44 (s, 3H); <sup>13</sup>C NMR (101 MHz, *chloroform-d*) δ 144.4, 133.0, 131.1, 126.2, 120.6, 36.4, 21.7; HRMS (ESI, m/z) m/z calculated for C<sub>9</sub>H<sub>10</sub>N<sub>2</sub>NaS (MNa)<sup>+</sup> 201.0462, found 201.0455; IR film: ν<sub>max</sub>/cm<sup>-1</sup> 2996, 2136, 1592, 1416, 1147, 750, 559, 501.

#### ***N*-(cyano) methyl 3-nitrophenyl sulfilimine (4h)**

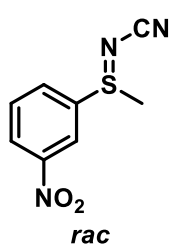

Synthesised from (3-nitrophenyl) (methyl) sulfane using general procedure **2.2**. Purification via flash chromatography on silica gel (eluent: hexane: EtOAc = 1:4); as a red oil (0.290 g, 32% Yield); <sup>1</sup>H NMR (400 MHz, *chloroform-d*) δ 8.61 (t, *J* = 2.1 Hz, 1H), 8.50 (ddd, *J* = 8.2, 2.1, 1.0 Hz, 1H), 8.26 – 8.18 (m, 1H), 7.89 (t, *J* = 8.2 Hz, 1H), 3.12 (s, 3H); <sup>13</sup>C NMR (101 MHz, *chloroform-d*) δ 149.0, 139.0, 132.0, 131.5, 127.7, 121.3, 119.5, 37.2; HRMS (ESI, m/z) m/z calculated for C<sub>8</sub>H<sub>7</sub>N<sub>3</sub>NaO<sub>2</sub>S (MNa)<sup>+</sup> 232.0157, found 232.0157; IR film: ν<sub>max</sub>/cm<sup>-1</sup> 3069, 2922, 2153, 1525, 1347, 1170, 734.

#### ***N*-(cyano) methyl 3-chlorophenyl sulfilimine (4i)**

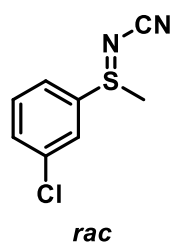

Synthesised from (3-chlorophenyl) (methyl) sulfane using general procedure **2.1**. Purification via flash chromatography on silica gel (gradient eluent: hexane: EtOAc = 1:1 to EtOAc); as a white solid (0.670 g, 84% Yield); M.p. = 79 – 81 °C; <sup>1</sup>H NMR (400 MHz, *chloroform-d*) δ 7.78 – 7.76 (m, 1H), 7.70 – 7.66 (m, 1H), 7.61 – 7.53 (m, 2H), 3.02 (s, 3H); <sup>13</sup>C NMR (101 MHz, *chloroform-d*) δ 138.2,

136.7, 133.4, 131.7, 125.9, 124.0, 37.1; HRMS (ESI, m/z) m/z calculated for  $C_8H_7^{35}ClN_2NaS$  (MNa)<sup>+</sup> 220.9916, found 220.9911.

***N*-(cyano) methyl 3-chloro-4-(trifluoromethyl)phenyl sulfilimine (4j)**

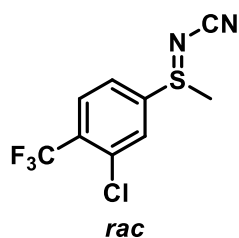

Synthesised from (3-chlorophenyl)-(methyl) sulfane using general procedure **2.1**. Purification via flash chromatography on silica gel (eluent: EtOAc); as a yellow oil (0.540 g, 82% Yield); <sup>1</sup>H NMR (400 MHz, *chloroform-d*) δ 7.96 – 7.92 (m, 2H), 7.83 – 7.79 (m, 1H), 3.07 (s, 3H); <sup>13</sup>C NMR (101 MHz, *chloroform-d*) δ 141.8, 135.1, 132.6 (q, *J* = 32.4 Hz), 129.6 (q, *J* = 4.9 Hz) 128.5, 124.1, 122.0 (q, *J* = 273.8 Hz), 37.3; <sup>19</sup>F NMR (376 MHz, *chloroform-d*) δ -63.1; HRMS (ESI, m/z) m/z calculated for  $C_9H_6^{35}ClF_3N_2NaS$  (MNa)<sup>+</sup> 288.9790, found 288.9792; IR film:  $\nu_{max}/cm^{-1}$  3043, 2149, 1606, 1403, 1321, 1168, 1126, 840, 700, 595.

***N*-(cyano) methyl 2-pyridyl sulfilimine (4k) <sup>[1]</sup>**

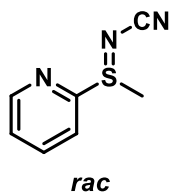

Synthesised from 2-pyridyl methyl sulfane using general procedure **2.1**. Purification via flash chromatography on silica gel (eluent: EtOAc); as a white solid (0.450 g, 66% Yield); <sup>1</sup>H NMR (400 MHz, *chloroform-d*) δ 8.67 – 8.64 (m, 1H), 8.07 (dt, *J* = 7.8, 1.1 Hz, 1H), 8.00 (td, *J* = 7.8, 1.1 Hz, 1H), 7.50 (ddd, *J* = 7.5, 4.7, 1.1 Hz, 1H), 3.15 (s, 3H); <sup>13</sup>C NMR (101 MHz, *chloroform-d*) δ 156.6, 150.6, 139.1, 126.2, 121.8, 120.1, 119.3, 33.9; HRMS (ESI, m/z) m/z calculated for  $C_7H_7N_3NaS$  (MNa)<sup>+</sup> 188.0258, found 188.0251.

***N*-(cyano) methyl (4-trifluoromethyl-2-pyridyl) sulfilimine (4l)**

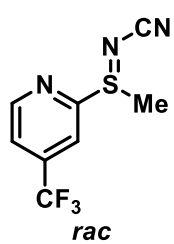

Synthesised from 2-(methylthio)-4-(trifluoromethyl) pyridine. Purification via flash chromatography (eluent: hexane: EtOAc = 2:3); as a yellow oil (0.650 g, 71% Yield);  $^1\text{H}$  NMR (400 MHz, chloroform-*d*)  $\delta$  8.89 (d,  $J$  = 5.1 Hz, 1H), 8.31 (s, 1H), 7.75 (d,  $J$  = 5.0 Hz, 1H), 3.22 (s, 3H);  $^{13}\text{C}$  NMR (101 MHz, chloroform-*d*)  $\delta$  158.8, 151.8, 141.7 (q,  $J$  = 34.7 Hz), 122.1 (q,  $J$  = 3.4 Hz), 121.9 (q,  $J$  = 274 Hz), 119.6, 118.1 (q,  $J$  = 3.4 Hz), 34.5; HRMS (ESI,  $m/z$ )  $m/z$  calculated for  $\text{C}_8\text{H}_6\text{F}_3\text{N}_3\text{NaS}$  ( $\text{MNa}^+$ ) 256.0132, found 256.0129; IR film:  $\nu_{\text{max}}/\text{cm}^{-1}$  3075, 2150, 1322, 1172, 1129, 858, 660, 460.

***N*-(cyano) methyl (5-trifluoromethyl-2-pyridyl) sulfilimine (4m)**

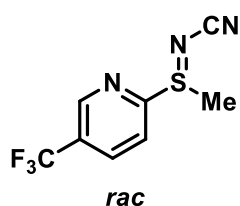

Synthesised from 2-(methylthio)-5-(trifluoromethyl) pyridine. Purification via flash chromatography (eluent: hexane: EtOAc = 2:3); as a red oil (0.450 g, 49% Yield);  $^1\text{H}$  NMR (400 MHz, chloroform-*d*)  $\delta$  8.97 – 8.92 (s, 1H), 8.27 (d,  $J$  = 1.5 Hz, 2H), 3.23 (s, 3H);  $^{13}\text{C}$  NMR (101 MHz, chloroform-*d*)  $\delta$  160.7, 147.7 (q,  $J$  = 3.5 Hz), 136.5 (q,  $J$  = 3.5 Hz), 129.2 (q,  $J$  = 33.8 Hz), 122.6 ( $J$  = 273.2 Hz), 122.1, 119.5, 34.1;  $^{19}\text{F}$  NMR (376 MHz, chloroform-*d*)  $\delta$  -62.41; HRMS (ESI,  $m/z$ )  $m/z$  calculated for  $\text{C}_8\text{H}_6\text{F}_3\text{N}_3\text{NaS}$  ( $\text{MNa}^+$ ) 256.0127, found 256.0129; IR film:  $\nu_{\text{max}}/\text{cm}^{-1}$  3014, 2152, 1713, 1592, 1324, 1101, 1071, 773, 549.

***N*-(cyano) ethyl phenyl sulfilimine (4n)**

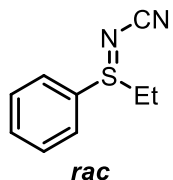

Synthesised from ethyl phenyl sulfane using general procedure 2.1. Purification via flash chromatography on silica gel (gradient eluent: hexane: EtOAc = 1:1 to EtOAc); as a colourless oil (1.26 g, 98% Yield);  $^1\text{H}$  NMR (400 MHz, chloroform-*d*)  $\delta$  7.78 – 7.74 (m, 2H), 7.65 – 7.56 (m, 3H), 3.26 (dq,  $J$  = 13.1, 7.4 Hz, 1H), 3.13 (dq,  $J$  = 13.1, 7.4 Hz, 1H), 1.37 (t,  $J$  = 7.4 Hz, 3H);  $^{13}\text{C}$  NMR (101 MHz, chloroform-*d*)  $\delta$

134.6, 133.2, 130.3, 126.5, 121.3, 46.7, 8.1; HRMS (ESI, m/z) m/z calculated for C<sub>9</sub>H<sub>10</sub>N<sub>2</sub>NaS (MNa)<sup>+</sup> 201.0462, found 201.0463; IR film:  $\nu_{\text{max}}/\text{cm}^{-1}$  3059, 2141, 1711, 1444, 1170, 686, 583.

#### ***N*-(cyano) propyl phenyl sulfilimine (4o)**

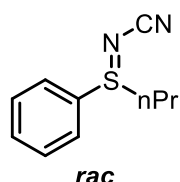

Synthesised from propyl phenyl sulfide using general procedure **2.1**. Purification via flash chromatography on silica gel (eluent: hexane: EtOAc = 2:8); as a colourless oil (0.590 g, 76% Yield); <sup>1</sup>H NMR (400 MHz, *chloroform-d*)  $\delta$  7.83 – 7.69 (m, 2H), 7.67 – 7.51 (m, 3H), 3.28 (ddd,  $J$  = 12.9, 7.9, 6.2 Hz, 1H), 2.99 (ddd,  $J$  = 12.9, 8.4, 7.3 Hz, 1H), 1.91 – 1.73 (m, 2H), 1.09 (t,  $J$  = 7.4 Hz, 3H); <sup>13</sup>C NMR (101 MHz, *chloroform-d*)  $\delta$  135.2, 133.2, 130.4, 126.4, 121.2, 54.4, 17.3, 13.0; HRMS (ESI, m/z) m/z calculated for C<sub>10</sub>H<sub>12</sub>N<sub>2</sub>NaS (MNa)<sup>+</sup> 217.0412, found 217.0407; IR film:  $\nu_{\text{max}}/\text{cm}^{-1}$  2967, 2934, 2141, 1444, 1149, 747, 668, 486.

#### ***N*-(cyano) iso-propyl phenyl sulfilimine (4p) <sup>[6]</sup>**

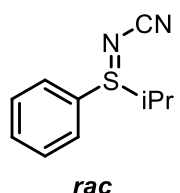

Synthesised from isopropyl phenyl sulfane using general procedure **2.1**. Purification via flash chromatography on silica gel (eluent: hexane: EtOAc = 1:4 to EtOAc); as a colourless oil (0.630 g, 81% Yield); <sup>1</sup>H NMR (400 MHz, *chloroform-d*)  $\delta$  7.76 – 7.72 (m, 2H), 7.65 – 7.55 (m, 3H), 3.34 (hept,  $J$  = 6.8 Hz, 1H), 1.35 (d,  $J$  = 6.8 Hz, 3H), 1.26 (d,  $J$  = 6.8 Hz, 3H); <sup>13</sup>C NMR (101 MHz, *chloroform-d*)  $\delta$  133.1, 132.9, 130.1, 127.2, 122.2, 54.3, 16.9, 15.6; HRMS (ESI, m/z) m/z calculated for C<sub>10</sub>H<sub>12</sub>N<sub>2</sub>NaS (MNa)<sup>+</sup> 215.0613, found 215.0613; IR film:  $\nu_{\text{max}}/\text{cm}^{-1}$  3059, 2145, 1633, 1443, 1155, 1081, 747, 483.

#### ***N*-(cyano) cyclopropyl phenyl sulfilimine (4q)**

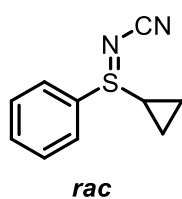

Synthesised from cyclopropyl phenyl sulfane using general procedure **2.1**.

Purification via flash chromatography on silica gel (eluent hexane: EtOAc =

3:7); as a golden oil (0.750 g, 70% yield); <sup>1</sup>H NMR (400 MHz, *chloroform-d*)

δ 7.83 – 7.73 (m, 1H), 7.66 – 7.54 (m, 2H), 2.76 – 2.64 (m, 1H), 1.49 – 1.34 (m, 1H), 1.31 –

1.14 (m, 3H); <sup>13</sup>C NMR (101 MHz, *chloroform-d*) δ 136.0, 132.9, 130.2, 128.6, 128.5, 127.3,

126.4, 121.3, 29.7, 28.5, 5.6, 4.6; HRMS (ESI, m/z) m/z calculated for C<sub>10</sub>H<sub>10</sub>N<sub>2</sub>NaS (MNa)<sup>+</sup>

213.0462, found 213.0461; IR film: ν<sub>max</sub>/cm<sup>-1</sup> 3025, 2143, 1703, 1444, 1156, 747, 685, 467.

#### ***N*-(cyano) benzyl phenyl sulfilimine (4r) <sup>[8]</sup>**

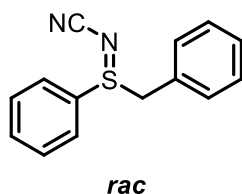

Synthesised from benzyl phenyl sulfane using general procedure **2.2**.

Purification via flash chromatography on silica gel (eluent: hexane:

EtOAc = 1:4); as a white, gum-like solid (1.08 g, 90% Yield); <sup>1</sup>H NMR

(400 MHz, *chloroform-d*) δ 7.67 – 7.56 (m, 3H), 7.56 – 7.47 (m, 2H), 7.41 – 7.21 (m, 3H), 7.18

– 7.11 (m, 2H), 4.56 (d, *J* = 12.6 Hz, 1H), 4.27 (d, *J* = 12.6 Hz, 1H); <sup>13</sup>C NMR (101 MHz,

*chloroform-d*) δ 134.3, 133.3, 130.8, 130.1, 129.8, 129.3, 127.4, 126.9, 120.9, 58.8.

#### ***N*-(cyano) phenethyl methyl sulfilimine (4s)**

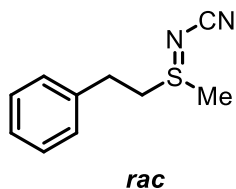

Synthesised from phenethyl methyl sulfane using general procedure **2.1**.

Purification via flash chromatography on silica gel (eluent: hexane: EtOAc

= 3:7); as a brown solid (0.400 g, 51% Yield); M.p. (°C) 68 – 70; <sup>1</sup>H NMR

(400 MHz, *chloroform-d*) δ 7.37 – 7.32 (m, 2H), 7.30 – 7.26 (m, 2H), 7.26 – 7.23 (m, 1H), 3.49

– 3.41 (m, 1H), 3.22 – 3.06 (m, 3H), 2.75 (s, 3H); <sup>13</sup>C NMR (101 MHz, *chloroform-d*) δ 136.9,

129.3, 128.7, 127.6, 119.9, 51.4, 32.8, 29.6; HRMS (ESI, m/z) m/z calculated for C<sub>10</sub>H<sub>12</sub>N<sub>2</sub>NaS

(MNa)<sup>+</sup> 215.0619, found 215.0618; IR film:  $\nu_{\text{max}}/\text{cm}^{-1}$  3028, 2130, 1602, 1454, 1154, 972, 770, 695, 556, 494

***N*-(cyano) methyl 4-nitrophenyl sulfilimine (4t)**

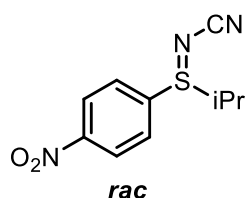

Synthesised from isopropyl 4-nitrophenyl sulfane following general procedure **2.2**. Purification via flash chromatography on silica gel (gradient eluent: hexane: EtOAc = 1:4 to EtOAc); as a red oil (0.860 g, 86% yield); <sup>1</sup>H NMR (400 MHz, *chloroform-d*)  $\delta$  8.44 – 8.33 (m, 2H), 7.98 – 7.91 (m, 2H), 3.40 (hept,  $J$  = 6.7 Hz, 1H), 1.35 (d,  $J$  = 6.7 Hz, 3H), 1.24 (d,  $J$  = 6.7 Hz, 3H); <sup>13</sup>C NMR (101 MHz, *chloroform-d*)  $\delta$  150.3, 139.6, 128.4, 128.1, 124.9, 121.5, 55.2, 16.9, 14.6; HRMS (ESI,  $m/z$ )  $m/z$  calculated for C<sub>10</sub>H<sub>12</sub>N<sub>3</sub>NaO<sub>2</sub>S (MNa)<sup>+</sup> 260.0470, found 260.0464; IR film:  $\nu_{\text{max}}/\text{cm}^{-1}$  3027, 2152, 1525, 1345, 1157, 852, 742, 492.

***N*-(cyano) methyl 4-trifluorophenyl sulfilimine (4u)**

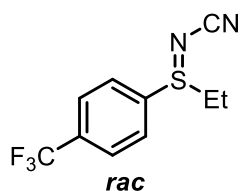

Synthesised from 4-trifluorophenyl methyl sulfane following general procedure **2.1**. Purification via flash chromatography on silica gel (eluent: EtOAc); as a yellow oil (0.660 g, 62% Yield); <sup>1</sup>H NMR (400 MHz, *chloroform-d*)  $\delta$  7.92 (d,  $J$  = 8.5 Hz, 2H), 7.87 (d,  $J$  = 8.6 Hz, 2H), 3.33 – 3.11 (m, 2H), 1.41 (t,  $J$  = 7.4 Hz, 3H); <sup>13</sup>C NMR (101 MHz, *chloroform-d*)  $\delta$  138.9, 135.02 (q,  $J$  = 32.7), 127.4 (q,  $J$  = 3.7 Hz), 126.9, 123.0 (q,  $J$  = 273 Hz) 120.7, 47.2, 7.9; <sup>19</sup>F NMR (376 MHz, *chloroform-d*)  $\delta$  -63.06; HRMS (ESI,  $m/z$ )  $m/z$  calculated for C<sub>10</sub>H<sub>10</sub>F<sub>3</sub>N<sub>2</sub>NaS (MNa)<sup>+</sup> 269.0336, found 269.0328; IR film:  $\nu_{\text{max}}/\text{cm}^{-1}$  3043, 2149, 1606, 1403, 1321, 1168, 1012, 840, 761, 595.

**(S)-N-(cyano) methyl phenyl sulfilimine ((S)-4a)** <sup>[1]</sup>

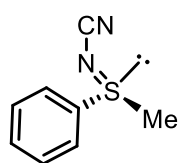

Synthesised from *N*-(cyano) methyl phenyl sulfilimine (49.0 mg, 0.300 mmol) using general procedure **2.4**. Purification via flash chromatography on silica gel (eluent: hexane: EtOAc = 2:3); as a colourless oil (20.0 mg, 35% yield);

$[\alpha]_D^{20} = -1.59$ , ( $c = 1.00$  in chloroform);  $^1\text{H}$  NMR (400 MHz, *chloroform-d*)  $\delta$  7.82 – 7.78 (m, 2H), 7.66 – 7.58 (m, 3H), 3.02 (s, 3H);  $^{13}\text{C}$  NMR (101 MHz, *chloroform-d*)  $\delta$  136.3, 133.3, 130.5, 126.1, 120.4, 36.6; HPLC Data: 32% *ee*, determined by HPLC (AS-H, flow rate: 0.8 mL/min, hexane/isopropanol: 65:35): *tr* (minor) = 27.01, *tr* (major) = 25.0. See section 4.0 for images depicting the HPLC trace.

**(S)-N-(cyano) methyl 4-methoxyphenyl sulfilimine ((S)-4b)** <sup>[1]</sup>

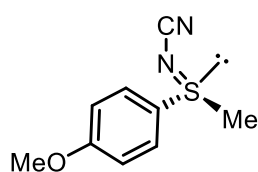

Synthesised from *N*-(cyano) methyl 4-methoxyphenyl sulfilimine (208 mg, 1.07 mmol) using general procedure **2.5**. Purification via flash chromatography on silica gel (gradient eluent: hexane: EtOAc = 1:4 to EtOAc: MeOH = 19:1); as a white solid (53.0 mg, 26% Yield);  $[\alpha]_D^{20} = -75.1$ , ( $c = 1.00$  in chloroform);  $^1\text{H}$  NMR (400 MHz, *chloroform-d*)  $\delta$  7.78 – 7.69 (m, 2H), 7.11 – 7.02 (m, 2H), 3.86 (s, 3H), 3.00 (s, 3H);  $^{13}\text{C}$  NMR (101 MHz, *chloroform-d*)  $\delta$  163.7, 128.5, 126.7, 120.6, 115.8, 55.9, 36.2; HRMS (ESI, *m/z*) *m/z* calculated for  $\text{C}_9\text{H}_{10}\text{N}_2\text{NaOS} (\text{MNa})^+$  217.0407, found 217.0412; HPLC Data: 73% *ee*, determined by HPLC (AD-H, flow rate: 0.8 mL/min, hexane/isopropanol: 80:20) *tr* (minor) = 19.47 min, *tr* (major) = 17.80 min. See section 4.0 for images depicting the HPLC trace.

**(S)-N-(cyano) methyl 3-methoxyphenyl sulfilimine ((S)-4c)**

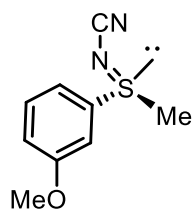

Synthesised from *N*-(cyano) methyl 3-methoxyphenyl sulfilimine (58.0 mg, 0.300 mmol) using general procedure **2.4**. Purification via flash chromatography on silica gel (gradient eluent: hexane: EtOAc = 7:3 to hexane: EtOAc = 1:1); as a yellow oil (21.0 mg, 36% Yield);  $[\alpha]_{\text{D}}^{20} = -23.34$ , ( $c = 1.00$  in chloroform);  $^1\text{H}$  NMR (400 MHz, *chloroform-d*)  $\delta$  7.47 (t,  $J = 8.0$  Hz, 1H), 7.37 – 7.24 (m, 2H), 7.15 – 7.08 (m, 1H), 3.87 (s, 2H), 2.99 (s, 3H);  $^{13}\text{C}$  NMR (101 MHz, *chloroform-d*)  $\delta$  160.9, 137.4, 131.4, 120.5, 119.4, 117.9, 110.5, 55.9, 36.9; HRMS (ESI,  $m/z$ )  $m/z$  calculated for  $\text{C}_9\text{H}_{10}\text{N}_2\text{NaOS} (\text{MNa})^+$  217.0412, found 217.0399; IR film:  $\nu_{\text{max}}/\text{cm}^{-1}$  3007, 2141 ( $\text{C}\equiv\text{N}$  stretch), 1593, 1481, 1241, 1148, 1029, 760, 680; ; HPLC Data: 38% *ee*, determined by HPLC (AD-H, flow rate: 1.0 mL/min, hexane/isopropanol: 85:15)  $t_{\text{r}}$  (minor) = 18.80 min,  $t_{\text{r}}$  (major) = 17.89 min. See section 4.0 for images depicting the HPLC trace.

**(S)-N-(cyano) methyl 4-chlorophenyl sulfilimine ((S)-4d) <sup>[2]</sup>**

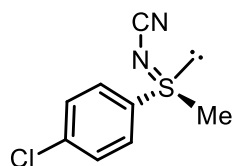

Synthesised from *N*-(cyano) methyl 4-chlorophenyl sulfilimine (99.0 mg, 0.500 mmol) using general procedure **2.4**. Purification via flash column chromatography (gradient eluent: hexane: EtOAc = 2: 3 to EtOAc); as a white solid (38.0 mg, 38% yield);  $[\alpha]_{\text{D}}^{20} = -71.75$  ( $c = 1.5$  in chloroform,);  $^1\text{H}$  NMR (400 MHz, *chloroform-d*)  $\delta$  7.78 – 7.72 (m, 2H), 7.62 – 7.57 (m, 2H), 3.02 (s, 3H);  $^{13}\text{C}$  NMR (101 MHz, *chloroform-d*)  $\delta$  140.0, 134.8, 130.8, 127.5, 36.8; HRMS (ESI,  $m/z$ )  $m/z$  calculated for  $\text{C}_8\text{H}_7\text{ClN}_2\text{NaS} (\text{MNa})^+$  220.9916, found 220.9914; [Note: The CN peak is not present in the  $^{13}\text{C}$  NMR spectra recorded. In the cited literature,<sup>[2]</sup> the CN is very weak and barely visible]; HPLC Data: 59% *ee* determined by HPLC (AD-H Chiralcel Column; flow rate: 1.0 mL/ min, hexane/isopropanol = 90:10, column temperature: 30 °C)  $t_{\text{r}}$  (minor) = 29.96 min,  $t_{\text{r}}$  (major) = 25.76 min. See section 4.0 for images depicting the HPLC trace.



**(S)-N-(cyano) methyl 4-trifluorophenyl sulfilimine ((S)-4e)** <sup>[6]</sup>

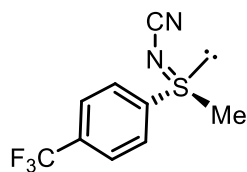

Synthesised from *N*-(cyano) methyl 4-trifluorophenyl sulfilimine (278 mg, 1.20 mmol) following general procedure **2.5**. Purification via flash chromatography on silica gel (gradient eluent: hexane: EtOAc = 7:3 to hexane: EtOAc = 2:3); as a colourless oil (119 mg, 43% Yield);  $[\alpha]_{\text{D}}^{20} = -120.24$ , ( $c = 1.00$  in chloroform);  $^1\text{H}$  NMR (400 MHz, *chloroform-d*)  $\delta$  7.95 (d,  $J = 8.7$  Hz, 2H), 7.89 (d,  $J = 8.7$  Hz, 2H), 3.07 (s, 3H);  $^{13}\text{C}$  NMR (151 MHz, Chloroform-*d*)  $\delta$  140.5, 135.1 (q,  $J = 33.5$  Hz), 127.4 (q,  $J = 3.8$  Hz), 126.4, 123.0 (q,  $J = 273.4$  Hz), 119.6, 36.8;  $^{19}\text{F}$  NMR (376 MHz, *chloroform-d*)  $\delta$  -63.09; HRMS (ESI,  $m/z$ )  $m/z$  calculated for  $\text{C}_9\text{H}_7\text{F}_3\text{N}_2\text{NaS}$  ( $\text{MNa}^+$ ) 255.0180, found 255.0181; HPLC Data: > 99% *ee* determined by HPLC (AD-H; flow rate: 0.8 mL/min, hexane/ isopropanol = 80:20)  $t_{\text{r}}$  (minor) = 12.06,  $t_{\text{r}}$  (major) = 11.34 min. See section 4.0 for images depicting the HPLC trace.

**(S)-N-(cyano) methyl 4-nitrilephenyl sulfilimine ((S)-4f)** <sup>[7]</sup>

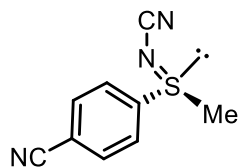

Synthesised from *N*-(cyano) methyl 4-nitrilephenyl sulfilimine (57.0 mg, 0.300 mmol) using general procedure **2.4**. Purification via flash chromatography on silica gel (eluent: hexane: EtOAc = 3:7 to EtOAc: MeOH = 9:1); as a white solid (32.0 mg, 55% yield);  $[\alpha]_{\text{D}}^{20} = -46.05$  ( $c = 1.0$  in chloroform);  $^1\text{H}$  NMR (400 MHz, *chloroform-d*)  $\delta$  7.96 – 7.88 (m, 4H), 3.06 (s, 3H);  $^{13}\text{C}$  NMR (101 MHz, *chloroform-d*)  $\delta$  141.5, 134.0, 126.7, 119.6, 117.0, 117.0, 37.0.; HPLC Data: 34% *ee* determined by HPLC (AS-H, flow rate: 1.0 mL/min, hexane/ isopropanol = 70:30, column temperature = 30 °C)  $t_{\text{r}}$  (minor) = 51.28 min,  $t_{\text{r}}$  (major) = 39.54 min. See Section 4.0 for images depicting the HPLC trace.

**(S)-N-(cyano) methyl 4-methylphenyl sulfilimine ((S)-4g)**

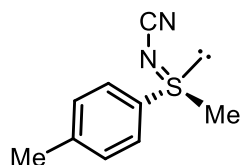

Synthesised from *N*-(cyano) methyl 4-methylphenyl sulfilimine (55.0 mg, 0.300 mmol) using general procedure **2.4**. Purification via flash chromatography on silica gel (gradient eluent: hexane: EtOAc = 3:7 to EtOAc); as a white solid (30.0 mg, 54% Yield); M.p. = 86 – 89 °C;  $[\alpha]_D^{20} = -42.94$  ( $c = 1.00$  in chloroform);  $^1\text{H}$  NMR (400 MHz, *chloroform-d*)  $\delta$  7.71 – 7.64 (m, 2H), 7.43 – 7.35 (m, 2H), 3.00 (s, 3H), 2.44 (s, 3H);  $^{13}\text{C}$  NMR (101 MHz, *chloroform-d*)  $\delta$  144.4, 133.0, 131.1, 126.2, 120.6, 36.4, 21.7; HRMS (ESI,  $m/z$ )  $m/z$  calculated for  $\text{C}_9\text{H}_{10}\text{N}_2\text{NaS} (\text{MNa})^+$  201.0462, found 201.0455 IR film:  $\nu_{\text{max}}/\text{cm}^{-1}$  2996, 2136, 1592, 1416, 1147, 750, 559, 501; HPLC Data: 46% *ee* determined by HPLC (AD-H, flow rate: 1.00 mL/ min, hexane/ isopropanol = 85:15)  $t_r$  (minor) = 18.95 min,  $t_r$  (major) = 16.02 min. See Section 4.0 for images depicting the HPLC trace.

**(S)-N-(cyano) methyl 3-nitrophenyl sulfilimine ((S)-4h)**

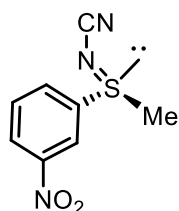

Synthesised from *N*-(cyano) methyl 3-nitrophenyl sulfilimine (63.0 mg, 0.300 mmol) using general procedure **2.4**. Purification via flash chromatography on silica gel (gradient eluent: hexane: EtOAc = 1:1 to EtOAc); as a red oil (25.0 mg, 37% Yield);  $[\alpha]_D^{20} = -45.24$  ( $c = 0.6$  in chloroform);  $^1\text{H}$  NMR (400 MHz, *chloroform-d*)  $\delta$  8.61 (t,  $J = 2.0$  Hz, 1H), 8.50 (ddd,  $J = 8.2, 2.2, 1.0$  Hz, 1H), 8.26 – 8.18 (m, 1H), 7.89 (t,  $J = 8.2$  Hz, 1H), 3.12 (s, 3H);  $^{13}\text{C}$  NMR (101 MHz, *chloroform-d*)  $\delta$  149.0, 139.0, 132.0, 131.5, 127.7, 121.3, 119.5, 37.2; HRMS (ESI,  $m/z$ )  $m/z$  calculated for  $\text{C}_8\text{H}_7\text{N}_3\text{NaO}_2\text{S} (\text{MNa})^+$  232.0157, found 232.0157; IR film:  $\nu_{\text{max}}/\text{cm}^{-1}$  3069, 2922, 2153, 1525, 1347, 1170, 734; HPLC Data: 44% *ee* determined by HPLC (AS-H, flow rate: 0.8 mL/min, hexane/ isopropanol: 60:40; column temperature: 30 °C)  $t_r$  (minor) = 43.19 min,  $t_r$  (major) = 47.35 min. See Section 4.0 for images depicting the HPLC trace.

**(S)-N-(cyano) methyl 3-chlorophenyl sulfilimine ((S)-4i)**

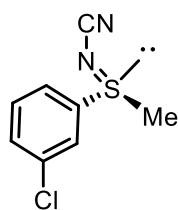

Synthesised from *N*-(cyano) methyl 3-nitrophenyl sulfilimine (59.0 mg, 0.300 mmol) using general procedure **2.4**. Purification via flash chromatography on silica gel (gradient eluent: hexane: EtOAc = 3:7 to EtOAc); as a white solid (26.0 mg, 44% Yield);  $[\alpha]_D^{20} = -66.55$  ( $c = 1.0$  in chloroform);  $^1\text{H}$  NMR (400 MHz, *chloroform-d*)  $\delta$  7.78 – 7.76 (m, 1H), 7.70 – 7.66 (m, 1H), 7.61 – 7.53 (m, 2H), 3.02 (s, 3H);  $^{13}\text{C}$  NMR (101 MHz, *chloroform-d*)  $\delta$  138.2, 136.7, 133.4, 131.7, 125.9, 124.0, 37.1; HRMS (ESI,  $m/z$ )  $m/z$  calculated for  $\text{C}_8\text{H}_7^{35}\text{ClN}_2\text{NaS}$  ( $\text{MNa}^+$ ) 220.9916, found 220.9911; HPLC Data: 44% *ee* as determined by HPLC (AS-H, flow rate: 0.8 mL/min, hexane/ isopropanol: 65:35; column temperature: 30 °C)  $t_r$  (minor) = 26.18 min,  $t_r$  (major) = 24.02 min. See Section 4.0 for images depicting the HPLC trace.

**(S)-N-cyano methyl 3-chloro-4-(trifluoromethyl)phenyl sulfilimine ((S)-4j)**

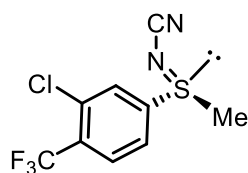

Synthesised from *N*-cyano methyl 3-chloro-4-(trifluoromethyl) phenyl sulfilimine (270 mg, 1.00 mmol) using general procedure **2.5**. Purification via flash chromatography on silica gel (gradient eluent: hexane: EtOAc = 7:3 to hexane: EtOAc = 1:4); as a colourless oil (122 mg, 45% Yield);  $[\alpha]_D^{20} = -122.51$  ( $c = 1.0$  in chloroform);  $^1\text{H}$  NMR (400 MHz, *chloroform-d*)  $\delta$  7.96 – 7.92 (m, 2H), 7.83 – 7.79 (m, 1H), 3.07 (s, 3H);  $^{13}\text{C}$  NMR (101 MHz, *chloroform-d*)  $\delta$  141.8, 135.1, 132.6 (q,  $J = 32.4$  Hz), 129.6 (q,  $J = 4.9$  Hz), 128.5, 124.1, 122.0 (q,  $J = 273.8$  Hz), 119.5, 37.3;  $^{19}\text{F}$  NMR (376 MHz, *chloroform-d*)  $\delta$  -63.1; HRMS (ESI,  $m/z$ )  $m/z$  calculated for  $\text{C}_9\text{H}_6^{35}\text{ClF}_3\text{N}_2\text{NaS}$  ( $\text{MNa}^+$ ) 288.9790, found 288.9792; IR film:  $\nu_{\text{max}}/\text{cm}^{-1}$  3043, 2149, 1606, 1403, 1321, 1168, 1126, 840, 700, 595; HPLC Data: > 99% *ee* determined

by HPLC (AS-H, flow rate: 0.80 mL/min, hexane/isopropanol: 70/30) tr (major) = 15.49. See Section 4.0 for images depicting the HPLC trace.

**(S)-N-(cyano) methyl 2-pyridyl sulfilimine ((S)-4k)** <sup>[1]</sup>

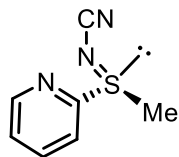

Synthesised from 2-pyridyl methyl sulfane (49.5 mg, 0.300 mmol) using general procedure 2.4. Purification via flash chromatography on silica gel (eluent: EtOAc); as a white solid (20.0 mg, 40% Yield); <sup>1</sup>H NMR (400 MHz, *chloroform-d*) δ 8.67 – 8.64 (m, 1H), 8.07 (dt, *J* = 8.0, 1.1 Hz, 1H), 8.00 (td, *J* = 7.5, 1.7 Hz, 1H), 7.50 (ddd, *J* = 7.5, 4.7, 1.1 Hz, 1H), 3.15 (s, 3H); <sup>13</sup>C NMR (101 MHz, *chloroform-d*) δ 156.6, 150.6, 139.1, 126.2, 121.8, 120.1, 119.3, 33.9; HRMS (ESI, *m/z*) *m/z* calculated for C<sub>7</sub>H<sub>7</sub>N<sub>3</sub>NaS (MNa)<sup>+</sup> 188.0258, found 188.0251.

**(S)-N-(cyano) methyl (4-trifluoromethyl-2-pyridyl) sulfilimine ((S)-4l)**

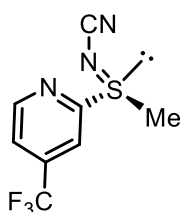

Synthesised from *N*-(cyano) methyl (4-trifluoromethyl-2-pyridyl) sulfilimine (71.0 mg, 0.300 mmol). Purification via flash chromatography (eluent: hexane: EtOAc = 2:3); as a yellow oil (35.0 mg, 50% Yield); [ $\alpha$ ]<sub>D</sub><sup>20</sup> = – 27.35 (*c* = 1.0 in chloroform, measured indirectly after oxidation with *m*-CPBA via general procedure 2.3), <sup>1</sup>H NMR (400 MHz, *chloroform-d*) δ 8.89 (d, *J* = 5.1 Hz, 1H), 8.31 (s, 1H), 7.75 (d, *J* = 5.1 Hz, 1H), 3.22 (s, 3H); <sup>13</sup>C NMR (101 MHz, *chloroform-d*) δ 158.8, 151.8, 141.7 (q, *J* = 34.7 Hz), 122.1 (q, *J* = 3.4 Hz), 121.9 (q, *J* = 274 Hz), 119.6, 118.1 (q, *J* = 3.4 Hz), 34.5; HRMS (ESI, *m/z*) *m/z* calculated for C<sub>8</sub>H<sub>6</sub>F<sub>3</sub>N<sub>3</sub>NaS (MNa)<sup>+</sup> 256.0132, found 256.0129; IR film:  $\nu_{\text{max}}/\text{cm}^{-1}$  3075, 2150, 1322, 1172, 1129, 858, 660, 460; HPLC Data: 35% *ee* determined by HPLC (AD-H, flow rate: 1.00 mL/min, hexane: isopropanol = 85:15) tr (minor) = 15.60 min, tr (major) = 14.08.

**(S)-N-(cyano) (5-trifluoromethyl-2-pyridyl) sulfilimine ((S)-4m)**

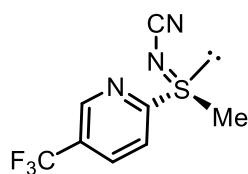

Synthesised *N*-(cyano) methyl (5-trifluoromethyl-2-pyridyl) sulfilimine (60.0 mg, 0.250 mmol) using general procedure **2.4**. Purification via flash chromatography (eluent: hexane: EtOAc = 2:3); as a red oil (30.0 mg, 53% Yield);  $[\alpha]_D^{21.5} = -32.96$  ( $c = 0.50$  in chloroform, measured indirectly after oxidation with *m*-CPBA via general procedure **2.3**);  $^1\text{H}$  NMR (400 MHz, chloroform-*d*)  $\delta$  8.97 – 8.92 (s, 1H), 8.27 (d,  $J = 1.5$  Hz, 2H), 3.23 (s, 3H);  $^{13}\text{C}$  NMR (101 MHz, chloroform-*d*)  $\delta$  160.7, 147.7 (q,  $J = 3.5$  Hz), 136.5 (q,  $J = 3.5$  Hz), 129.2 (q,  $J = 33.8$  Hz), 122.6 ( $J = 273.2$  Hz), 122.1, 119.5, 34.1;  $^{19}\text{F}$  NMR (376 MHz, chloroform-*d*)  $\delta$  –62.41; HRMS (ESI,  $m/z$ )  $m/z$  calculated for  $\text{C}_8\text{H}_6\text{F}_3\text{N}_3\text{NaS} (\text{MNa})^+$  256.0127, found 256.0129; IR film:  $\nu_{\text{max}}/\text{cm}^{-1}$  3014, 2152, 1713, 1592, 1324, 1101, 1071, 773, 549; HPLC Data: 40% *ee* determined by HPLC (AD-H, flowrate: 0.8 mL/ min, hexane: isopropanol = 85:15)  $t_r$  (minor) = 20.17 min,  $t_r$  (major) = 22.56 min. See Section 4.0 for images depicting the HPLC trace.

**(S)-N-(cyano) ethyl phenyl sulfilimine ((S)-4n)**

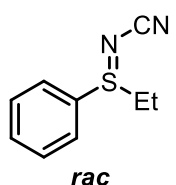

Synthesised from *N*-(cyano) ethyl phenyl sulfilimine (58.0 mg, 0.300 mmol) using general procedure **2.4**. Purification via flash chromatography on silica gel (gradient eluent: hexane: EtOAc = 2:3 to EtOAc); as a colourless oil (22.0 mg, 48% Yield);  $[\alpha]_D^{21.5} = -51.45$  ( $c = 1.00$  in chloroform);  $^1\text{H}$  NMR (400 MHz, chloroform-*d*)  $\delta$  7.78 – 7.74 (m, 2H), 7.65 – 7.56 (m, 3H), 3.26 (dq,  $J = 13.1, 7.4$  Hz, 1H), 3.13 (dq,  $J = 13.1, 7.4$  Hz, 1H), 1.37 (t,  $J = 7.4$  Hz, 3H);  $^{13}\text{C}$  NMR (101 MHz, chloroform-*d*)  $\delta$  134.6, 133.2, 130.3, 126.5, 121.3, 46.7, 8.1; HRMS (ESI,  $m/z$ )  $m/z$  calculated for  $\text{C}_9\text{H}_{10}\text{N}_2\text{NaS} (\text{MNa})^+$  201.0462, found 201.0463.; IR film:  $\nu_{\text{max}}/\text{cm}^{-1}$  3059, 2141, 1711, 1444, 1170, 686, 583; HPLC Data: 28% *ee* determined by HPLC (AD-H, flow rate: 0.8 mL/ min, hexane: isopropanol = 80:20)  $t_r$  (minor) = 14.90 min,  $t_r$  (major) = 13.90 min. See Section 4.0 for images of the HPLC trace.

**(S)-N-(cyano) propyl phenyl sulfilimine ((S)-4o)**

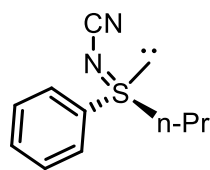

Synthesised from *N*-(cyano) propyl phenyl sulfilimine (58.0 mg, 0.300 mmol) using general procedure **2.1**. Purification via flash chromatography on silica gel (gradient eluent: hexane: EtOAc = 7:8 to EtOAc); as a golden oil (0.590 g, 59% Yield);  $[\alpha]_D^{21.5} = -33.38$  ( $c = 1.00$  in chloroform);  $^1\text{H}$  NMR (400 MHz, *chloroform-d*)  $\delta$  7.83 – 7.69 (m, 2H), 7.67 – 7.51 (m, 3H), 3.28 (ddd,  $J = 12.9, 7.9, 6.2$  Hz, 1H), 2.99 (ddd,  $J = 12.9, 8.4, 7.3$  Hz, 1H), 1.91 – 1.73 (m, 2H), 1.09 (t,  $J = 7.4$  Hz, 3H);  $^{13}\text{C}$  NMR (101 MHz, *chloroform-d*)  $\delta$  135.2, 133.2, 130.4, 126.4, 121.2, 54.4, 17.3, 13.0; IR film:  $\nu_{\text{max}}/\text{cm}^{-1}$  2967, 2934, 2141, 1444, 1149, 747, 668, 486; HRMS (ESI,  $m/z$ )  $m/z$  calculated for  $\text{C}_{10}\text{H}_{12}\text{N}_2\text{NaS}$  ( $\text{MNa}^+$ ) 217.0412, found 217.0407; HPLC Data: 12% *ee* determined by HPLC (AD-H, flowrate: 1.00 mL/min, hexane/isopropanol = 95:5, column temperature: 30 °C)  $t_r$  (minor) = 62.51 min,  $t_r$  (major) = 59.80 min. See Section 4.0 for images depicting the HPLC trace.

**(S)-N-(cyano) iso-propyl phenyl sulfilimine ((S)-4p) <sup>[6]</sup>**

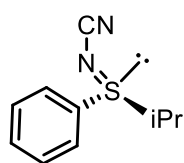

Synthesised from *N*-(cyano) iso-propyl phenyl sulfilimine (58.0 mg, 0.300 mmol) using general procedure **2.4**. Purification via flash chromatography on silica gel (eluent: hexane: EtOAc = 1:1 to hexane: EtOAc = 1:4); as a colourless oil (37.0 mg, 63% Yield);  $[\alpha]_D^{20} = -56.93$  ( $c = 1.00$  in chloroform);  $^1\text{H}$  NMR (400 MHz, *chloroform-d*)  $\delta$  7.76 – 7.72 (m, 2H), 7.65 – 7.55 (m, 3H), 3.34 (hept,  $J = 6.8$  Hz, 1H), 1.35 (d,  $J = 6.8$  Hz, 3H), 1.26 (d,  $J = 6.8$  Hz, 3H);  $^{13}\text{C}$  NMR (101 MHz, *chloroform-d*)  $\delta$  133.1, 132.9, 130.1, 127.2, 122.2, 54.3, 16.9, 15.6; HRMS (ESI,  $m/z$ )  $m/z$  calculated for  $\text{C}_{10}\text{H}_{12}\text{N}_2\text{NaS}$  ( $\text{MNa}^+$ ) 215.0613, found 215.0613; IR film:  $\nu_{\text{max}}/\text{cm}^{-1}$  3059, 2145, 1633, 1443, 1155, 1081, 747, 483; HPLC Data: 26% *ee* determined by HPLC (AS-H, flowrate: 1.00 mL/min, hexane:

isopropanol = 70:30) tr (minor) = 39.49 min, tr (major) = 28.21 min. See Section 4.0 for images depicting the HPLC trace.

**(*S*)-*N*-(cyano) cyclopropyl phenyl sulfilimine ((*S*)-4q)**

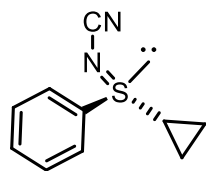

Synthesised from *N*-(cyano) cyclopropyl phenyl sulfilimine (57.0 mg, 0.300 mmol) using general procedure **2.1**. Purification via flash chromatography on silica gel (eluent hexane: EtOAc = 3:7); as a golden oil (26.0 mg, 46% yield);  $[\alpha]_D^{20} = -30.82$  (c = 1.00 in chloroform);  $^1\text{H}$  NMR (400 MHz, *chloroform-d*)  $\delta$  7.83 – 7.73 (m, 1H), 7.66 – 7.54 (m, 2H), 2.76 – 2.64 (m, 1H), 1.49 – 1.34 (m, 1H), 1.31 – 1.14 (m, 3H);  $^{13}\text{C}$  NMR (101 MHz, *chloroform-d*)  $\delta$  136.0, 132.9, 130.2, 128.6, 128.5, 127.3, 126.4, 121.3, 29.7, 28.5, 5.6, 4.6; IR film:  $\nu_{\text{max}}/\text{cm}^{-1}$  3025, 2143, 1703, 1444, 1156, 747, 685, 467; HRMS (ESI, m/z) m/z calculated for  $\text{C}_{10}\text{H}_{10}\text{N}_2\text{NaS}$  (MNa) $^+$  213.0462, found 213.0461; HPLC Data: 34% *ee*, determined by HPLC (AD-H, flowrate: 1.00 mL/ min, hexane: isopropanol = 85:15, column temperature: 30 °C) tr (minor) = 17.71 min, tr (major) = 18.58 min. The *ee* was measured by first oxidising the recovered sulfilimine to the corresponding sulfoximine using general procedure **2.3**. See Section 4.0 for images depicting the HPLC trace.

**(*S*)-*N*-(cyano) benzyl phenyl sulfilimine ((*S*)-4r) <sup>[8]</sup>**

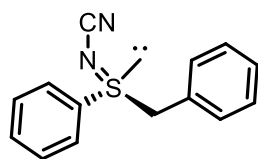

Synthesised from *N*-(cyano) benzyl phenyl sulfilimine (73.0 mg, 0.300 mmol) using general procedure **2.4**. Purification via flash chromatography on silica gel (eluent: hexane: EtOAc = 3: 7); as a white, gum-like solid (40.0 mg, 55% Yield);  $^1\text{H}$  NMR (400 MHz, *chloroform-d*)  $\delta$  7.67 – 7.56 (m, 3H), 7.56 – 7.47 (m, 2H), 7.41 – 7.21 (m, 3H), 7.18 – 7.11 (m, 2H), 4.56 (d,  $J$  = 12.6 Hz, 1H), 4.27 (d,  $J$  = 12.6 Hz, 1H);  $^{13}\text{C}$  NMR (101 MHz, *chloroform-d*)  $\delta$  134.3, 133.3, 130.8, 130.1, 129.8, 129.3, 127.4, 126.9, 120.9, 58.8; HPLC Data: 16% *ee* determined by HPLC (AS-H,

flowrate: 0.8 mL/ min, hexane: isopropanol = 65:35) tr (minor) = 34.12 min, tr (major) = 41.41 min. See Section 4.0 for images depicting the HPLC trace.

**(S)-N-(cyano) phenethyl methyl sulfilimine ((S)-4s)**

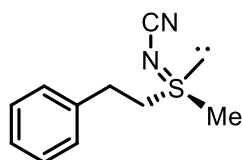

Synthesised from *N*-(cyano) phenethyl methyl sulfilimine (58.0 mg, 0.300 mmol) using general procedure **2.4**. Purification via flash chromatography on silica gel (eluent: hexane: EtOAc = 3:7); as a golden oil (19.0 mg, 31% Yield);  $[\alpha]_D^{20} = -29.16$  ( $c = 1.00$  in chloroform); M.p. (°C) 68 – 70;  $^1\text{H}$  NMR (400 MHz, *chloroform-d*)  $\delta$  7.37 – 7.32 (m, 2H), 7.30 – 7.26 (m, 2H), 7.26 – 7.23 (m, 1H), 3.49 – 3.41 (m, 1H), 3.22 – 3.06 (m, 3H), 2.75 (s, 3H);  $^{13}\text{C}$  NMR (101 MHz, *chloroform-d*)  $\delta$  136.9, 129.3, 128.7, 127.6, 119.9, 51.4, 32.8, 29.6; HRMS (ESI,  $m/z$ )  $m/z$  calculated for  $\text{C}_{10}\text{H}_{12}\text{N}_2\text{NaS} (\text{MNa})^+$  215.0619, found 215.0618; IR film:  $\nu_{\text{max}}/\text{cm}^{-1}$  3028, 2130, 1602, 1454, 1154, 972, 770, 695, 556, 494.

**(S)-N-(cyano) isopropyl 4-nitrophenyl sulfilimine ((S)-4t)**

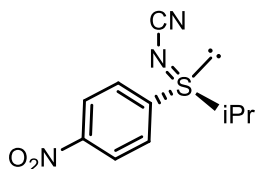

Synthesised from *N*-(cyano) isopropyl 4-nitrophenyl sulfilimine (238 mg, 1.00 mmol) following general procedure **2.5**. Purification via flash chromatography on silica gel (gradient eluent: hexane: EtOAc = 2:3 to EtOAc); as a red oil (111 mg, 47% yield);  $[\alpha]_D^{20} = -186.09$  ( $c = 1.00$  in chloroform);  $^1\text{H}$  NMR (400 MHz, *chloroform-d*)  $\delta$  8.44 – 8.33 (m, 2H), 7.98 – 7.91 (m, 2H), 3.40 (hept,  $J = 6.7$  Hz, 1H), 1.35 (d,  $J = 6.7$  Hz, 3H), 1.24 (d,  $J = 6.7$  Hz, 3H);  $^{13}\text{C}$  NMR (101 MHz, *chloroform-d*)  $\delta$  150.3, 139.6, 128.4, 128.1, 124.9, 121.5, 55.2, 16.9, 14.6; HRMS (ESI,  $m/z$ )  $m/z$  calculated for  $\text{C}_{10}\text{H}_{12}\text{N}_3\text{NaO}_2\text{S} (\text{MNa})^+$  260.0470, found 260.0464; IR film:  $\nu_{\text{max}}/\text{cm}^{-1}$  3027, 2152, 1525, 1345, 1157, 852, 742, 492; HPLC Data: 84% *ee* determined by HPLC (AD-H, flowrate: 1.00 mL/ min, hexane: isopropanol = 80:20) tr (minor) = 19.61 min, tr (major) = 17.97 min. See Section 4.0 for images depicting the HPLC trace.



**(S)-N-(cyano) ethyl 4-trifluorophenyl sulfilimine ((S)-4u)**

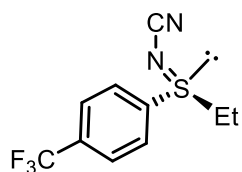

Synthesised from *N*-(cyano) ethyl 4-trifluorophenyl ethyl sulfilimine (246 mg, 1.00 mmol) using general procedure **2.5**. Purification via flash chromatography on silica gel (gradient eluent: hexane: EtOAc = 2:3 to EtOAc); as a colourless oil (109 mg, 47% Yield);  $[\alpha]_D^{20} = -194.67$  ( $c = 1.00$  in chloroform);  $^1\text{H}$  NMR (400 MHz, *chloroform-d*)  $\delta$  7.92 (d,  $J = 8.6$  Hz, 2H), 7.87 (d,  $J = 8.6$  Hz, 2H), 3.33 – 3.11 (m, 2H), 1.41 (t,  $J = 7.4$  Hz, 3H);  $^{13}\text{C}$  NMR (101 MHz, *chloroform-d*)  $\delta$  138.9, 135.02 ( $J = 32.7$ ), 127.4 (q,  $J = 3.7$  Hz), 126.9, 123.0 (q,  $J = 273$  Hz) 120.7, 47.2, 7.9;  $^{19}\text{F}$  NMR (376 MHz, *chloroform-d*)  $\delta$  –63.06; HRMS (ESI,  $m/z$ )  $m/z$  calculated for  $\text{C}_{10}\text{H}_{10}\text{F}_3\text{N}_2\text{NaS}$  ( $\text{MNa}^+$ ) 269.0336, found 269.0328; IR film:  $\nu_{\text{max}}/\text{cm}^{-1}$  3043, 2149, 1606, 1403, 1321, 1168, 1012, 840, 761, 595; HPLC Data: > 99% *ee* determined by HPLC (AS-H, flowrate: 0.80 mL/ min, hexane: isopropanol = 70:30)  $t_r$  (major) = 14.70 min,  $t_r$  (minor) = 17.29 min.

**(S)-N-(cyano) methyl phenyl sulfoximine ((S)-5a) <sup>[1]</sup>**

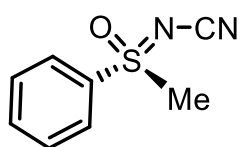

Synthesised from *N*-(cyano) methyl phenyl sulfilimine (49.0 mg, 0.300 mmol) using general procedure **2.4**. Purification via flash chromatography on silica gel (eluent: hexane: EtOAc = 2:3); as a colourless oil (16.0 mg, 22% yield);  $[\alpha]_D^{20} = +46.54$  ( $c = 1.00$  in chloroform), Lit  $[\alpha]_D = +196$  ( $c = 0.41$  in chloroform);  $^1\text{H}$  NMR (400 MHz, *chloroform-d*)  $\delta$  7.98 – 7.94 (m, 2H), 7.76 (tt,  $J = 7.8, 1.3$  Hz, 1H), 7.68 – 7.63 (dd,  $J = 8.5, 7.2$  Hz, 2H), 3.32 (s, 3H);  $^{13}\text{C}$  NMR (101 MHz, *chloroform-d*)  $\delta$  135.9, 135.5, 130.3, 127.8, 127.5, 112.0, 44.7; HPLC Data: 74% *ee*, determined by HPLC (AS-H, flow rate: 0.8 mL/min, hexane/isopropanol: 65:35):  $t_r$  (minor) = 23.51 min,  $t_r$  (major) = 26.63 min. See section 4.0 for images depicting the HPLC trace.

**(S)-N-(cyano) methyl 4-methoxyphenyl sulfoximine ((S)-5b)** <sup>[1]</sup>

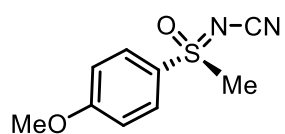

Synthesised from *N*-(cyano) methyl 4-methoxyphenyl sulfilimine (208 mg, 1.07 mmol) using general procedure **2.5**. Purification via flash chromatography on silica gel (gradient eluent: hexane: EtOAc = 1:4 to EtOAc: MeOH = 19:1); as a white solid (93.0 mg, 41% Yield);  $[\alpha]_D^{20} = +174.72$  ( $c = 1.00$  in chloroform);  $^1\text{H}$  NMR (400 MHz, *chloroform-d*)  $\delta$  7.94 – 7.85 (m, 2H), 7.12 – 7.05 (m, 2H), 3.90 (s, 3H), 3.30 (s, 3H);  $^{13}\text{C}$  NMR (101 MHz, *chloroform-d*)  $\delta$  165.2, 130.4, 126.7, 115.6, 112.3, 56.1, 45.3; HPLC Data: 90% *ee* determined by HPLC (AD-H, flow rate: 0.80 mL/min, hexane/isopropanol: 80:20) tr (minor) = 21.95 min, tr (major) = 23.20 min. See section 4.0 for images depicting the HPLC trace.

**(S)-N-(cyano) methyl 3-methoxyphenyl sulfilimine ((S)-5c)** <sup>[9]</sup>

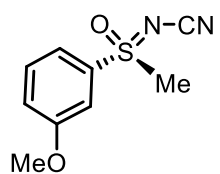

Synthesised from *N*-(cyano) methyl 3-methoxyphenyl sulfilimine (58.0 mg, 0.300 mmol) using general procedure **2.4**. Purification via flash chromatography on silica gel (gradient eluent: hexane: EtOAc = 7:3 to hexane: EtOAc = 1:1); as a colourless oil (18.0 mg, 29% Yield);  $[\alpha]_D^{20} = +75.14$  ( $c = 1.00$  in chloroform);  $^1\text{H}$  NMR (400 MHz, *chloroform-d*)  $\delta$  7.61 – 7.54 (m, 2H), 7.47 – 7.44 (m, 1H), 7.30 – 7.27 (m, 1H), 3.91 (s, 3H), 3.33 (s, 3H);  $^{13}\text{C}$  NMR (101 MHz, *chloroform-d*)  $\delta$  160.8, 137.3, 131.5, 122.0, 120.0, 112.5, 111.9, 56.1, 44.9; HPLC Data: 90% *ee* determined by HPLC (AD-H, flow-rate: 0.8 mL/min, hexane/isopropanol: 80/20) tr (minor) = 17.20 min, tr (major) = 19.24 min. See Section 4.0 for images depicting the HPLC trace.

**(S)-N-(cyano) methyl 4-chlorophenyl sulfoximine ((S)-5d)** <sup>[9]</sup>

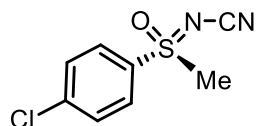

Synthesised from *N*-(cyano) methyl 4-chlorophenyl sulfilimine (99.0 mg, 0.500 mmol) using general procedure **2.4**. Purification via flash

column chromatography (gradient eluent: hexane: EtOAc = 2: 3 to EtOAc); as a colourless oil (49.0 mg, 46% yield);  $[\alpha]_{\text{D}}^{20} = +124.58$  ( $c = 1.0$  in chloroform);  $^1\text{H}$  NMR (400 MHz, *chloroform-d*)  $\delta$  7.97 – 7.89 (m, 2H), 7.69 – 7.61 (m, 2H), 3.35 (s, 3H);  $^{13}\text{C}$  NMR (101 MHz, *chloroform-d*)  $\delta$  142.7, 134.5, 130.7, 129.5, 111.6, 44.9; HRMS (ESI,  $m/z$ )  $m/z$  calculated for  $\text{C}_8\text{H}_7\text{ClN}_2\text{NaOS} (\text{MNa})^+$  236.9865, found 236.9871; HPLC Data: 90% *ee* determined by HPLC (AD-H Chiralcel Column; flow rate: 1.0 mL/ min, hexane/isopropanol = 90:10, column temperature: 30 °C)  $t_{\text{r}}$  (minor) = 32.58 min,  $t_{\text{r}}$  (major) = 40.14 min. See Section 4.0 for images depicting the HPLC trace.

**(*S*)-*N*-(cyano) methyl 4-trifluorophenyl sulfoximine ((*S*)-5e) <sup>[9]</sup>**

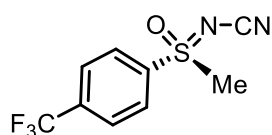

Synthesised from *N*-(cyano) methyl 4-trifluorophenyl sulfilimine (278 mg, 1.20 mmol) following general procedure **2.5**. Purification via flash chromatography on silica gel (gradient eluent: hexane: EtOAc = 7:3 to hexane: EtOAc = 2:3); as a colourless oil (147 mg, 44 % yield);  $[\alpha]_{\text{D}}^{20} = +123.75$ , ( $c = 1.00$  in chloroform);  $^1\text{H}$  NMR (400 MHz, *chloroform-d*)  $\delta$  8.16 (d,  $J = 8.2$  Hz, 2H), 7.96 (d,  $J = 8.2$  Hz, 2H), 3.39 (s, 3H;  $\text{CH}_3$ );  $^{13}\text{C}$  NMR (101 MHz, *chloroform-d*)  $\delta$  139.9, 137.2 (q,  $J = 37.2$  Hz), 128.9, 127.59 (q,  $J = 3.6$  Hz), 122.8 (q,  $J = 273$  Hz), 111.3, 44.7;  $^{19}\text{F}$  NMR (376 MHz, *chloroform-d*)  $\delta$  -63.30; HRMS (ESI,  $m/z$ )  $m/z$  calculated for  $\text{C}_9\text{H}_7\text{F}_3\text{N}_2\text{NaOS} (\text{MNa})^+$  271.0123, found 271.0123; IR film:  $\nu_{\text{max}}/\text{cm}^{-1}$  2924 (C-H stretch), 2197, 1403, 1320, 824; HPLC Data: 94% *ee* as determined by HPLC (AD-H; flow rate: 0.8 mL/ min, hexane/ isopropanol = 80:20)  $t_{\text{r}}$  (minor) = 11.40 min,  $t_{\text{r}}$  (major) = 13.12 min. See Section 4.0 for images depicting the HPLC trace.

**(*R*)-*N*-(cyano) methyl 4-trifluorophenyl sulfoximine ((*S*)-5e)**

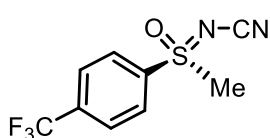

Synthesised from **4e** (119 mg, 0.513 mmol) following general procedure **2.3**. Purification via flash chromatography on silica gel

(gradient eluent: hexane: EtOAc = 7:3 to hexane: EtOAc = 2:3); as a colourless oil (108 mg, 87 % Yield);  $[\alpha]_{\text{D}}^{20} = -124.85$ , ( $c = 1.00$  in chloroform); All other spectroscopic data were identical to those above.

**(S)-N-(cyano) methyl 4-cyanophenyl sulfoximine ((S)-5f)** <sup>[8]</sup>

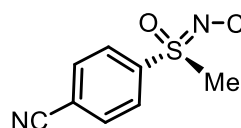

Synthesised from *N*-(cyano) methyl 4-cyanophenyl sulfilimine (57.0 mg, 0.300 mmol) using general procedure **2.4**. Purification via flash chromatography on silica gel (eluent: hexane: EtOAc = 3:7 to EtOAc: MeOH = 9:1); as a colourless oil, (20.0 mg, 33% Yield);  $[\alpha]_{\text{D}}^{20} = +119.1$ , ( $c = 1.36$  in chloroform);  $^1\text{H}$  NMR (400 MHz, *chloroform-d*)  $\delta$  8.19 – 8.10 (m, 2H), 8.05 – 7.96 (m, 2H), 3.40 (s, 3H);  $^{13}\text{C}$  NMR (101 MHz, *chloroform-d*)  $\delta$  140.5, 134.1, 128.9, 119.4, 116.6, 111.0, 44.6; HRMS (ESI,  $m/z$ )  $m/z$  calculated for  $\text{C}_9\text{H}_7\text{N}_3\text{NaOS}$  ( $\text{MNa}^+$ ) 228.0208, found 228.0208; IR film:  $\nu_{\text{max}}/\text{cm}^{-1}$  3093, 2923, 2197, 1399, 1251, 826; HPLC Data: 80% *ee* determined by HPLC (AS-H, flow rate: 1.0 mL/min, hexane/ isopropanol = 70:30, column temperature = 30 °C) *tr* (minor) = 70.64 min, *tr* (major) = 66.07 min. See Section 4.0 for pictures depicting the HPLC trace.

**(S)-N-(cyano) methyl 4-methylphenyl sulfilimine ((S)-5g)** <sup>[10]</sup>

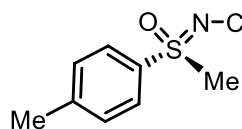

Synthesised from *N*-(cyano) methyl 4-methylphenyl sulfilimine (55.0 mg, 0.300 mmol) using general procedure **2.4**. Purification via flash chromatography on silica gel (gradient eluent: hexane: EtOAc = 3:7 to EtOAc); as a white solid (21.0 mg, 38% Yield);  $[\alpha]_{\text{D}}^{20} = +115.79$  ( $c = 1.0$  in chloroform);  $^1\text{H}$  NMR (400 MHz, *chloroform-d*)  $\delta$  7.90 – 7.83 (m, 2H), 7.51 – 7.43 (m, 2H), 3.31 (s, 3H), 2.49 (s, 3H);  $^{13}\text{C}$  NMR (101 MHz, *chloroform-d*)  $\delta$  147.1, 133.0, 1301.0, 128.1, 112.1, 45.1, 21.9; HPLC Data: 88% *ee* determined by HPLC (AD-H, flow rate: 1.00 mL/ min, hexane/ isopropanol = 85:15) *tr*

(minor) = 18.91 min, tr (major) = 22.71 min. See Section 4.0 for images depicting the HPLC trace.

**(*S*)-*N*-(cyano) methyl 3-nitrophenyl sulfoximine ((*S*)-5h) <sup>[11]</sup>**

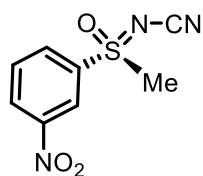

Synthesised from *N*-(cyano) methyl 3-nitrophenyl sulfilimine (63.0 mg, 0.300 mmol) using general procedure **2.4**. Purification via flash chromatography on silica gel (gradient eluent: hexane: EtOAc = 1:1 to EtOAc); as a yellow oil (25.0 mg, 38% yield),  $[\alpha]_D^{20} = +107.77$  ( $c = 0.8$  in chloroform);  $^1\text{H}$  NMR (400 MHz, *chloroform-d*)  $\delta$  8.85 (t,  $J = 1.9$  Hz, 1H), 8.65 (ddd,  $J = 8.2, 1.9, 1.0$  Hz, 1H), 8.35 (ddd,  $J = 7.9, 1.9, 1.0$  Hz, 1H), 7.96 (app. t,  $J = 8.1$  Hz, 1H), 3.45 (s, 3H);  $^{13}\text{C}$  NMR (101 MHz, *chloroform-d*)  $\delta$  149.1, 138.6, 133.5, 132.0, 130.0, 123.7, 110.8, 44.7; HRMS (ESI,  $m/z$ )  $m/z$  calculated for  $\text{C}_8\text{H}_7\text{N}_3\text{NaO}_3\text{S}$  ( $\text{MNa}^+$ ) 248.0106, found 248.0099; HPLC Data: 82% *ee* determined by HPLC (AS-H, flow rate: 0.8 mL/min, hexane/ isopropanol: 60:40; column temperature: 30 °C) tr (minor) = 34.45 min, tr (major) = 41.58 min. See Section 4.0 for images depicting the HPLC trace.

**(*S*)-*N*-(cyano) methyl 3-chlorophenyl sulfoximine ((*S*)-5i) <sup>[12]</sup>**

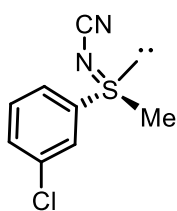

Synthesised from *N*-(cyano) methyl 3-chlorophenyl sulfilimine (59.0 mg, 0.300 mmol) using general procedure **2.4**. Purification via flash chromatography on silica gel (gradient eluent: hexane: EtOAc = 1:1 to EtOAc); as a red solid (23.0 mg, 36% Yield),  $[\alpha]_D^{20} = +103.25$  ( $c = 1.0$  in chloroform);  $^1\text{H}$  NMR (400 MHz, *chloroform-d*)  $\delta$  7.98 (t,  $J = 2.0$  Hz, 1H), 7.91 – 7.88 (m, 1H), 7.78 – 7.74 (m, 1H), 7.64 (t,  $J = 8.0$  Hz, 1H), 3.36 (s, 3H);  $^{13}\text{C}$  NMR (101 MHz, *chloroform-d*)  $\delta$  138.0, 136.8, 135.8, 131.7, 128.1, 126.2, 111.4, 44.9; HPLC Data: 80% *ee* as determined by HPLC (AS-H, flow rate: 0.8 mL/min, hexane/ isopropanol: 60:40; column temperature: 30 °C) tr (minor) = 16.57 min, tr (major) = 22.03 min. See Section 4.0 for images depicting the HPLC trace.

**(S)-N-cyano methyl 3-chloro-4-(trifluoromethyl)phenyl sulfoximine ((S)-5j)**

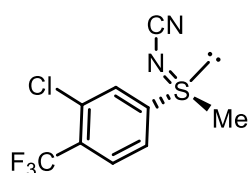

Synthesised from *N*-cyano methyl 3-chloro-4-(trifluoromethyl) phenyl sulfilimine (270 mg, 1.00 mmol) using general procedure **2.5**.

Purification via flash chromatography on silica gel (gradient eluent:

hexane: EtOAc = 7:3 to hexane: EtOAc = 1:4); as a white solid (132 mg, 47% Yield); Mp (°C) = 97 – 98;  $[\alpha]_D^{20} = 106.16$  ( $c = 1.0$  in chloroform);  $^1\text{H}$  NMR (400 MHz, chloroform-*d*)  $\delta$  8.16 – 8.14 (m, 1H), 8.05 – 7.99 (m, 2H), 3.41 (s, 3H);  $^{13}\text{C}$  NMR (101 MHz, chloroform-*d*)  $\delta$  141.04, 135.2 (q,  $J = 1.4$  Hz), 135.0 (q,  $J = 32.4$  Hz), 131.0, 129.8 (q,  $J = 5.4$  Hz), 126.4, 121.7 (q,  $J = 273.8$  Hz), 110.8, 44.7;  $^{19}\text{F}$  NMR (376 MHz, chloroform-*d*)  $\delta$  –63.40; HRMS (ESI,  $m/z$ )  $m/z$  calculated for  $\text{C}_9\text{H}_6\text{ClF}_3\text{N}_2\text{NaSO}$  (MNa) $^+$  304.9739, found 304.9737; IR film:  $\nu_{\text{max}}/\text{cm}^{-1}$  3035, 2189, 1588, 1391, 1310, 1249, 1105, 1027, 969, 827, 554, 454; HPLC Data: 98% *ee* determined by HPLC (AS-H, flow rate: 0.80 mL/min, hexane/isopropanol: 70/30)  $t_r$  (minor) = 14.77 min,  $t_r$  (major) = 16.49 min. See Section 4.0 for images depicting the HPLC trace.

**(S)-N-(cyano) methyl 2-pyridyl sulfoximine ((S)-5k) <sup>[1]</sup>**

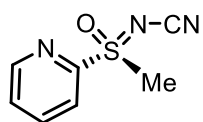

Synthesised from 2-pyridyl methyl sulfane (49.5 mg, 0.300 mmol) using general procedure **2.4**. Purification *via* flash chromatography on silica gel

(eluent: EtOAc); as a white solid (23.0 mg, 40% Yield);  $[\alpha]_D^{20} = +17.87$  ( $c = 1.0$  in chloroform);  $^1\text{H}$  NMR (400 MHz, chloroform-*d*)  $\delta$  8.79 (ddd,  $J = 4.7, 1.8, 1.0$  Hz, 1H), 8.20 (dt,  $J = 7.8, 1.0$  Hz, 1H), 8.09 (td,  $J = 7.8, 1.8$  Hz, 1H), 7.69 (ddd,  $J = 7.8, 4.7, 1.0$  Hz, 1H), 3.51 (s, 3H);  $^{13}\text{C}$  NMR (101 MHz, chloroform-*d*)  $\delta$  154.7, 150.9, 139.2, 128.9, 122.6, 111.6, 39.8; HRMS (ESI,  $m/z$ )  $m/z$  calculated for  $\text{C}_7\text{H}_7\text{N}_3\text{NaOS}$  (MNa) $^+$  204.0208, found 204.0203; HPLC Data: 64% *ee* determined by HPLC (AD-H, flow rate: 0.8 mL/min, hexane: isopropanol = 80:20),  $t_r$  (minor) = 23.24 min,  $t_r$  (major) = 21.65 min. See Section 4.0 for images depicting the HPLC trace.

**(S)-N-(cyano) methyl (4-trifluoromethyl-2-pyridyl) sulfoximine ((S)-5l)**

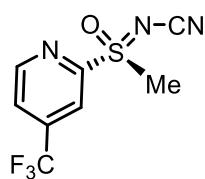

Synthesised from *N*-(cyano) (4-trifluoromethyl-2-pyridyl) sulfilimine (71.0 mg, 0.300 mmol). Purification *via* flash chromatography (eluent: hexane: EtOAc = 2:3); as a white crystalline solid (20 mg; 27% Yield); Mp (°C) = 106;  $[\alpha]_D^{20} = +34.63$  ( $c = 0.79$  in chloroform);  $^1\text{H}$  NMR (400 MHz, chloroform-*d*)  $\delta$  9.04 – 9.00 (m, 1H), 8.43 – 8.40 (m, 1H), 7.94 – 7.90 (m, 1H), 3.57 (s, 3H);  $^{13}\text{C}$  NMR (101 MHz, chloroform-*d*)  $\delta$  156.3, 152.2, 141.8 (q,  $J = 36.4$  Hz), 124.8 (q,  $J = 3.4$  Hz), 121.7 (q,  $J = 274$  Hz), 118.9 (q,  $J = 3.4$  Hz), 110.9, 40.0;  $^{19}\text{F}$  NMR (376 MHz, chloroform-*d*)  $\delta$  –64.49; HRMS (ESI,  $m/z$ )  $m/z$  calculated for  $\text{C}_8\text{H}_6\text{F}_3\text{N}_3\text{NaOS}$  (MNa) $^+$  272.0081, found 272.0079; IR film:  $\nu_{\text{max}}/\text{cm}^{-1}$  2924, 2201, 1326 (S=O), 1257, 1144, 989, 751, 662, 489; HPLC Data: 90% *ee* determined by HPLC (AD-H, flowrate: 1.00 mL/ min, hexane/ isopropanol: 85:15, column temperature: 30 °C)  $t_r$  (minor) = 14.09 min,  $t_r$  (major) = 15.67 min. See Section 4.0 depicting the HPLC trace.

**(S)-N-(cyano) methyl (5-trifluoromethyl-2-pyridyl) sulfoximine ((S)-5m)**

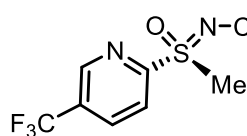

Synthesised *N*-(cyano) (5-trifluoromethyl-2-pyridyl) sulfilimine (60.0 mg, 0.250 mmol) using general procedure **2.4**. Purification *via* flash chromatography (eluent: hexane: EtOAc = 2:3); as a yellow oil (20.0 mg, 30% Yield);  $[\alpha]_D^{20} = +81.37$ , ( $c = 1.00$  in chloroform);  $^1\text{H}$  NMR (400 MHz, chloroform-*d*)  $\delta$  9.10 – 9.03 (m, 1H), 8.39 – 8.33 (m, 2H), 3.57 (s, 3H);  $^{13}\text{C}$  NMR (101 MHz, chloroform-*d*)  $\delta$  157.9, 148.0 (q,  $J = 4.0$  Hz), 136.6 (q,  $J = 3.6$  Hz), 131.5 (q,  $J = 34.5$  Hz), 122.2, 122.2 (q,  $J = 273$  Hz), 111.0, 39.6; HRMS (ESI,  $m/z$ )  $m/z$  calculated for  $[\text{C}_8\text{H}_6\text{F}_3\text{N}_3\text{NaOS}]^+$  = 272.0081, found 272.0076; IR film:  $\nu_{\text{max}}/\text{cm}^{-1}$  3015, 2923, 2199, 1594, 1327, 1140, 827; HPLC Data: 90% *ee* determined by HPLC (AD-H, flowrate: 0.8 mL/ min, hexane: isopropanol = 85:15)  $t_r$  (minor) = 22.34 min,  $t_r$  (major) = 19.94 min. See Section 4.0 for images depicting the HPLC trace.

**(S)-N-(cyano) ethyl phenyl sulfoximine ((S)-5n)** <sup>[12]</sup>

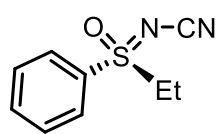

Synthesised from N-(cyano) ethyl phenyl sulfilimine (58.0 mg, 0.300 mmol) using general procedure **2.4**. Purification *via* flash chromatography on silica gel (gradient eluent: hexane: EtOAc = 2:3 to EtOAc); as a colourless oil (22.0 mg, 48% Yield);  $[\alpha]_D^{21.5} = +58.52$  ( $c = 1.00$  in chloroform);  $^1\text{H}$  NMR (400 MHz, *chloroform-d*)  $\delta$  8.00 – 7.91 (m, 2H), 7.79 (tt, 1H), 7.74 – 7.64 (m, 2H), 3.45 (dq,  $J = 14.7, 7.4$  Hz, 1H), 3.38 (dq,  $J = 14.7, 7.4$  Hz, 1H), 1.34 (t,  $J = 7.4$  Hz, 3H);  $^{13}\text{C}$  NMR (101 MHz, *chloroform-d*)  $\delta$  135.5, 134.1, 130.3, 128.8, 112.2, 51.6, 7.2; HRMS (ESI,  $m/z$ )  $m/z$  calculated for  $\text{C}_9\text{H}_{10}\text{N}_2\text{NaOS} (\text{MNa})^+$  217.0412, found 217.0407; HPLC Data: 50% *ee* determined by HPLC (AD-H, flow rate: 0.8 mL/ min, hexane: isopropanol = 80:20)  $t_r$  (minor) = 17.28 min,  $t_r$  (major) = 18.70 min. See Section 4.0 for images depicting the HPLC trace.

**(S)-N-(cyano) n-propyl phenyl sulfoximine ((S)-5o)** <sup>[12]</sup>

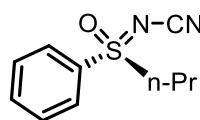

Synthesised from N-(cyano) propyl phenyl sulfilimine (58.0 mg, 0.300 mmol) using general procedure **2.1**. Purification *via* flash chromatography on silica gel (gradient eluent: hexane: EtOAc = 7:8 to EtOAc); as a colourless oil (17.0 mg, 27% Yield);  $[\alpha]_D^{21.5} = +55.75$  ( $c = 1.00$  in chloroform);  $^1\text{H}$  NMR (400 MHz, *chloroform-d*)  $\delta$  7.98 – 7.91 (m, 2H), 7.78 (tt,  $J = 7.2, 1.4$  Hz, 1H), 7.72 – 7.63 (m, 2H), 3.44 – 3.36 (m, 1H), 3.34 – 3.26 (m, 1H), 1.92 – 1.66 (m, 2H), 1.02 (t,  $J = 7.4$  Hz, 3H);  $^{13}\text{C}$  NMR (101 MHz, *chloroform-d*)  $\delta$  135.5, 134.8, 130.3, 128.6, 112.2, 58.4, 16.3, 12.6; HRMS (ESI,  $m/z$ )  $m/z$  calculated for  $\text{C}_{10}\text{H}_{12}\text{N}_2\text{NaOS} (\text{MNa})^+$  231.0568, found 231.0568; IR film:  $\nu_{\text{max}}/\text{cm}^{-1}$  2971, 2191, 1447, 1240, 1183, 1091, 824, 750, 727, 541, 473; HPLC Data: 42% *ee* determined by HPLC (AD-H, flowrate: 1.00 mL/ min, hexane: isopropanol = 90:10)  $t_r$  (minor) = 34.11 min,  $t_r$  (major) = 35.85 min. See Section 4.0 for images depicting the HPLC trace.



**(S)-N-(cyano) iso-propyl phenyl sulfoximine ((S)-5p)**

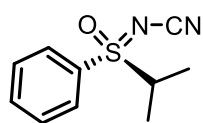

Synthesised from *N*-(cyano) iso-propyl phenyl sulfilimine (58.0 mg, 0.300 mmol) using general procedure **2.4**. Purification *via* flash chromatography on silica gel (eluent: hexane: EtOAc = 1:1 to hexane: EtOAc = 1:4); as a golden oil (22 mg, 35% Yield);  $[\alpha]_D^{20} = +71.05$  ( $c = 1.00$  in chloroform);  $^1\text{H}$  NMR (400 MHz, *chloroform-d*)  $\delta$  7.94 – 7.87 (m, 2H), 7.82 – 7.74 (m, 1H), 7.71 – 7.63 (m, 2H), 3.51 (hept,  $J = 6.8$  Hz, 1H), 1.43 (d,  $J = 6.9$  Hz, 3H), 1.32 (d,  $J = 6.9$  Hz, 3H);  $^{13}\text{C}$  NMR (101 MHz, *chloroform-d*)  $\delta$  135.4, 132.7, 130.1, 129.6, 112.6, 57.8, 15.8, 15.3; HRMS (ESI,  $m/z$ )  $m/z$  calculated for  $\text{C}_{10}\text{H}_{12}\text{N}_2\text{NaOS} (\text{MNa})^+$  231.0568, found, 231.0558; IR film:  $\nu_{\text{max}}/\text{cm}^{-1}$  2985, 2191, 1448, 1446, 1234, 1189, 1087, 826, 721, 687, 554; HPLC Data: 76% *ee* (AS-H, flowrate: 1.00 mL/min, hexane: isopropanol = 70:30)  $t_r$  (minor) = 19.65 min,  $t_r$  (major) = 21.38 min. See Section 4.0 for images depicting the HPLC trace.

**(S)-N-(cyano) cyclopropyl phenyl sulfoximine ((S)-5q) <sup>[12]</sup>**

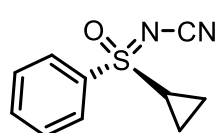

Synthesised from *N*-(cyano) cyclopropyl phenyl sulfilimine (57.0 mg, 0.300 mmol) using general procedure **2.1**. Purification *via* flash chromatography on silica gel (eluent hexane: EtOAc = 3:7); as a golden oil (13 mg, 21% Yield);  $[\alpha]_D^{21.1} = +38.23$  ( $c = 1.00$  in chloroform);  $^1\text{H}$  NMR (400 MHz, *chloroform-d*)  $\delta$  7.98 – 7.93 (m, 2H), 7.77 (tt,  $J = 7.8, 1.4$  Hz, 1H), 7.69 – 7.63 (m, 2H), 2.73 – 2.65 (m, 1H), 1.74 – 1.67 (m, 1H), 1.43 – 1.28 (m, 3H), 1.16 – 1.08 (m, 1H);  $^{13}\text{C}$  NMR (101 MHz, *chloroform-d*)  $\delta$  136.5, 135.2, 130.2, 128.1, 112.2, 33.7, 7.2, 6.1; HPLC Data: 74% *ee* determined by HPLC (AD-H, flowrate: 1.00 mL/min, hexane: isopropanol = 85:15, column temperature: 30 °C)  $t_r$  (minor) = 17.3 min,  $t_r$  (major) = 16.59 min. See Section 4.0 for images depicting the HPLC trace.

**(S)-N-(cyano) benzyl phenyl sulfoximine ((S)-5r)** <sup>[8]</sup>

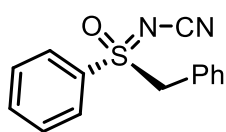

Synthesised from *N*-(cyano) benzyl phenyl sulfilimine (73.0 mg, 0.300 mmol) using general procedure **2.4**. Purification via flash chromatography on silica gel (eluent: hexane: EtOAc = 3: 7); as a white solid (21 mg, 27% Yield); <sup>1</sup>H NMR (400 MHz, *chloroform-d*)  $\delta$  7.75 – 7.69 (m, 1H), 7.65 – 7.61 (m, 2H), 7.56 – 7.51 (m, 2H), 7.40 – 7.35 (m, 1H), 7.31 – 7.27 (m, 2H), 7.06 – 7.03 (m, 2H), 4.62 (s, 2H); <sup>13</sup>C NMR (101 MHz, *chloroform-d*)  $\delta$  135.5, 133.2, 131.4, 130.1, 129.8, 129.3, 129.1, 125.6, 112.3, 63.5; HPLC Data: 56% *ee* determined by HPLC (AS-H, flowrate: 0.8 mL/ min, hexane: isopropanol = 65:35) tr (minor) = 29.58 min, tr (major) = 25.28 min. See Section 4.0 for images depicting the HPLC trace.

**(S)-N-(cyano) phenethyl methyl sulfoximine ((S)-5s)**

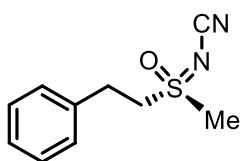

Synthesised from *N*-(cyano) phenethyl methyl sulfilimine (58.0 mg, 0.300 mmol) using general procedure **2.4**. Purification via flash chromatography on silica gel (eluent: hexane: EtOAc = 3:7); as a white solid (21 mg, 36% Yield);  $[\alpha]_D^{20} = +9.70$  (c = 1.00 in chloroform); <sup>1</sup>H NMR (400 MHz, *chloroform-d*)  $\delta$  7.39 – 7.34 (m, 2H), 7.33 – 7.26 (m, 2H), 7.26 – 7.24 (m, 1H), 3.76 – 3.67 (m, 1H), 3.65 – 3.56 (m, 1H), 3.28 – 3.22 (m, 2H), 3.04 (s, 3H); <sup>13</sup>C NMR (101 MHz, *chloroform-d*)  $\delta$  135.8, 129.4, 128.7, 127.9, 112.1, 56.5, 41.0, 28.8; C<sub>10</sub>H<sub>12</sub>N<sub>2</sub>NaOS (MNa)<sup>+</sup> 231.0568, found, 231.0564; IR film:  $\nu_{\max}/\text{cm}^{-1}$  2923, 2192, 1455, 1245, 1131, 820, 701; HPLC Data: 60% *ee* determined by HPLC (AS-H, flowrate: 1.0 mL/min, hexane: isopropanol = 70:30) tr (minor) = 29.83 min, tr (major) = 25.02 min. See Section 4.0 for images depicting the HPLC trace.

**(S)-N-(cyano) isopropyl 4-nitrophenyl sulfoximine ((S)-5t)**

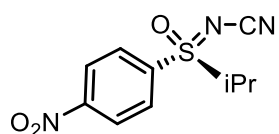

Synthesised from *N*-(cyano) isopropyl 4-nitrophenyl sulfilimine (238 mg, 1.00 mmol) following general procedure **2.5**. Purification via flash chromatography on silica gel (gradient eluent: hexane: EtOAc = 2:3 to EtOAc); as a white solid (111 mg, 44% yield); M.p. 111 – 112 °C;  $[\alpha]_D^{20} = +178.19$  ( $c = 1.00$  in chloroform);  $^1\text{H}$  NMR (400 MHz, *chloroform-d*)  $\delta$  8.54 – 8.50 (m, 2H), 8.17 – 8.13 (m, 2H), 3.59 (hept,  $J = 6.9$  Hz, 1H), 1.49 (d,  $J = 6.9$  Hz, 3H), 1.38 (d,  $J = 6.9$  Hz, 3H);  $^{13}\text{C}$  NMR (101 MHz, *chloroform-d*)  $\delta$  163.1, 151.9, 139.0, 131.2, 125.2, 111.5, 58.1, 15.8, 15.2; HRMS (ESI,  $m/z$ )  $m/z$  calculated for  $\text{C}_{10}\text{H}_{12}\text{N}_3\text{NaO}_3\text{S}$  ( $\text{MNa}^+$ ) 276.0413, found 276.0419; IR film:  $\nu_{\text{max}}/\text{cm}^{-1}$  3104, 2987, 2198, 1534, 1353, 1242, 827, 734, 493; HPLC Data: 90% *ee* determined by HPLC (AD-H, flowrate: 1.00 mL/ min, hexane: isopropanol = 80:20)  $t_r$  (minor) = 24.12 min,  $t_r$  (major) = 26.89 min. See Section 4.0 for images depicting the HPLC trace.

**(S)-N-(cyano) ethyl 4-trifluorophenyl sulfoximine ((S)-5u)**

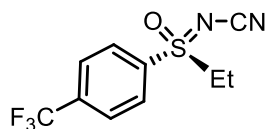

Synthesised from *N*-(cyano) ethyl 4-trifluorophenyl sulfilimine (246 mg, 1.0 mmol) using general procedure **2.5**. Purification *via* flash chromatography on silica gel (gradient eluent: hexane: EtOAc = 2:3 to EtOAc); as a colourless oil (120 mg, 46% Yield);  $[\alpha]_D^{20} = +122.51$  ( $c = 1.00$  in chloroform);  $^1\text{H}$  NMR (400 MHz, *chloroform-d*)  $\delta$  8.11 (d,  $J = 8.4$  Hz, 2H), 7.95 (d,  $J = 8.4$  Hz, 2H), 3.58 – 3.36 (m, 2H), 1.39 (t,  $J = 7.4$  Hz, 3H);  $^{13}\text{C}$  NMR (101 MHz, *chloroform-d*)  $\delta$  138.0, 137.1 (q,  $J = 33.8$ ), 129.6, 127.5 (q,  $J = 3.4$  Hz), 122.8 (q,  $J = 273.1$  Hz), 111.5, 51.6, 7.1;  $^{19}\text{F}$  NMR (376 MHz, *chloroform-d*)  $\delta$  -63.28; HRMS (ESI,  $m/z$ )  $m/z$  calculated for  $\text{C}_{10}\text{H}_{10}\text{F}_3\text{N}_2\text{NaSO}$  ( $\text{MNa}^+$ ) 285.0285, found 285.0281; IR film:  $\nu_{\text{max}}/\text{cm}^{-1}$  3051, 2196, 1404, 1321, 1174, 1091, 831, 719, 540; HPLC Data: 96% *ee* determined by HPLC (AS-H, flowrate: 0.80 mL/ min, hexane: isopropanol = 70:30)  $t_r$  (minor) = 13.79  $t_r$  (major) = 15.69 min. See Section 4.0 for images depicting the HPLC trace

### Synthesis of *S*-methyl-*S*-[4-(trifluoromethyl)phenyl]-sulfoximine ((*S*)-**9e**) <sup>[13]</sup>

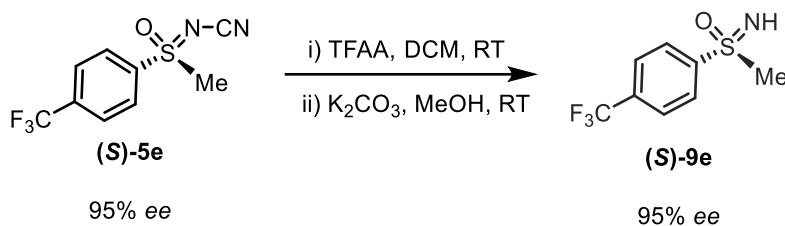

To a stirring solution of (*S*)-**5e** (144 mg, 0.580 mmol) in DCM (8.00 mL) was added TFAA (0.250 mL, 1.74 mmol) at 0 °C before the reaction temperature was raised to RT and stirred for 3 h. A further aliquot of TFAA (0.250 mL, 1.74 mmol) was added and the reaction stirred for 16 h. The solvent was removed *in vacuo* and the crude material dissolved in dry MeOH (10.0 mL) and stirred with solid K<sub>2</sub>CO<sub>3</sub> (350 mg, 2.5 mmol) for 4 h, upon which, the solvent was removed *in vacuo* and the resultant crude dissolved in H<sub>2</sub>O (10 mL). The reaction was extracted with EtOAc (3 x 30 mL), and the combined organic phase washed with saturated brine (40 mL), dried over MgSO<sub>4</sub>, filtered, and the solvent removed *in vacuo* to afford a white solid. Purification via flash column chromatography on silica gel (eluent: hexane: EtOAc = 1:4) afforded (*S*)-**9e** as white crystals (100 mg, 83% Yield).  $[\alpha]_{\text{D}}^{20.9} = +16.62$  ( $c = 1.00$  in chloroform), Lit  $[\alpha]_{\text{D}}^{25} = +16.3$  ( $c = 1.1$  in chloroform); <sup>1</sup>H NMR (400 MHz, *chloroform-d*)  $\delta$  8.14 (d,  $J = 7.6$  Hz, 2H), 7.81 (d,  $J = 7.6$  Hz, 2H), 3.11 (d,  $J = 1.5$  Hz, 3H), 2.71 (br s, 1H, N-H); <sup>13</sup>C NMR (101 MHz, *chloroform-d*)  $\delta$  147.3, 134.8 (q,  $J = 33.0$  Hz), 128.5, 126.5 (q,  $J = 3.7$  Hz), 123.3 (q,  $J = 273$  Hz), 46.1; <sup>19</sup>F NMR (376 MHz, *chloroform-d*)  $\delta$  -62.99.

### (*E*)-*N*-benzylidene-*S*-isopropylthiohydroxylamine (6a-*i*Pr)

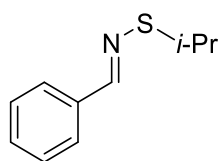

Synthesised from benzylamine (0.660 mL, 6.00 mmol) using general procedure **2.1**. Purified by flash column chromatography on silica gel (eluent: hexane : DCM = 5:1); yellow oil (270 mg, 24% yield); <sup>1</sup>H NMR (400 MHz, *Chloroform-d*)  $\delta$  8.47 (s, 1H), 7.68 – 7.57 (m, 2H), 7.42 – 7.32 (m, 3H), 3.56 (hept,

$J = 6.8$  Hz, 1H), 1.43 (d,  $J = 6.8$  Hz, 6H);  $^{13}\text{C}$  NMR (101 MHz, *Chloroform-d*)  $\delta$  156.1, 136.8, 129.8, 128.7, 127.0, 40.6, 21.7; HRMS (ESI) calcd. for  $\text{C}_{10}\text{H}_{14}\text{NS}$  ( $\text{MH}^+$ ): 180.0847, found 180.0841; IR (film):  $\nu_{\text{max}}/\text{cm}^{-1}$  2960, 1447, 1239, 749, 689.

**(*E*)-*N*-(4-fluorobenzylidene)-*S*-isopropylthiohydroxylamine (6b-*i*Pr)**

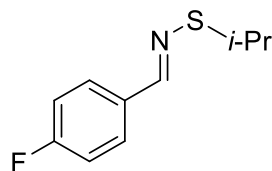

Synthesised from (4-fluorophenyl)methanamine (752 mg, 6.00 mmol) using general procedure **2.1**. Purified by flash column chromatography on silica gel (eluent: hexane : DCM = 5:1); yellow oil (70.0 mg, 7% yield);  $^1\text{H}$  NMR (400 MHz, *Chloroform-d*)  $\delta$  8.42 (s, 1H), 7.69 – 7.54 (m, 2H), 7.06 (t,  $J = 8.7$  Hz, 2H), 3.54 (pd,  $J = 6.8, 0.9$  Hz, 1H), 1.42 (d,  $J = 6.8$  Hz, 6H);  $^{13}\text{C}$  NMR (101 MHz, *Chloroform-d*)  $\delta$  164.9, 154.5, 128.7 (d,  $J = 9.1$  Hz), 115.6 (d,  $J = 22.2$  Hz), 40.6, 21.6; HRMS (ESI) calcd. for  $\text{C}_{10}\text{H}_{13}\text{FNS}$  ( $\text{MH}^+$ ): 198.0753, found 198.0747; IR (film):  $\nu_{\text{max}}/\text{cm}^{-1}$  2961, 1506, 1227, 830.

**(*E*)-*N*-(4-chlorobenzylidene)-*S*-isopropylthiohydroxylamine (6c-*i*Pr)**

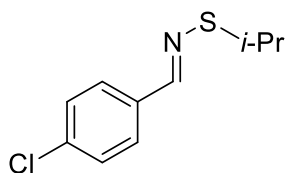

Synthesised from (4-chlorophenyl)methanamine (0.730 mL, 6.00 mmol) using general procedure **2.1**. Purified by flash column chromatography on silica gel (eluent: hexane : DCM = 5:1); yellow oil (150 mg, 15% yield);  $^1\text{H}$  NMR (400 MHz, *Chloroform-d*)  $\delta$  8.41 (s, 1H), 7.54 (d,  $J = 8.4$  Hz, 2H), 7.34 (d,  $J = 8.4$  Hz, 2H), 3.54 (dt,  $J = 13.5, 6.9$  Hz, 1H), 1.42 (d,  $J = 6.9$  Hz, 6H).  $^{13}\text{C}$  NMR (101 MHz, *Chloroform-d*)  $\delta$  154.4, 135.6, 135.2, 128.8, 128.0, 40.7, 21.5; HRMS (ESI) calcd. for  $\text{C}_{10}\text{H}_{13}^{35}\text{ClNS}$  ( $\text{MH}^+$ ): 214.0457, found 214.0452; IR (film):  $\nu_{\text{max}}/\text{cm}^{-1}$  2961, 1488, 1086, 818.

**(*E*)-*N*-(4-bromobenzylidene)-*S*-isopropylthiohydroxylamine (6d-*i*Pr)**

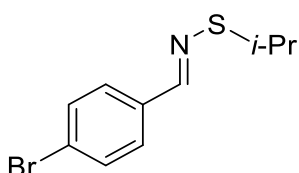

Synthesised from (4-bromophenyl)methanamine (1.10 g, 6.00 mmol) using general procedure **2.1**. Purified by flash column chromatography on silica gel (eluent: hexane : DCM = 5:1); yellow

oil (73.0 mg, 6% yield);  $^1\text{H}$  NMR (400 MHz, *Chloroform-d*)  $\delta$  8.39 (s, 1H), 7.58 – 7.39 (m, 4H), 3.54 (hept,  $J$  = 6.8 Hz, 1H), 1.42 (d,  $J$  = 6.8 Hz, 6H);  $^{13}\text{C}$  NMR (101 MHz, *Chloroform-d*)  $\delta$  154.6, 135.7, 131.9, 128.3, 124.1, 40.8, 21.6; HRMS (ESI) calcd. for  $\text{C}_{10}\text{H}_{13}^{79}\text{BrNS}$  ( $\text{MH}^+$ ): 259.9926, found 259.9932; IR (film):  $\nu_{\text{max}}/\text{cm}^{-1}$  2961, 1588, 1485, 1239, 1068, 1008, 816.

**(*E*)-*S*-isopropyl-*N*-(4-(trifluoromethyl)benzylidene)thiohydroxylamine (6e-*i*Pr)**

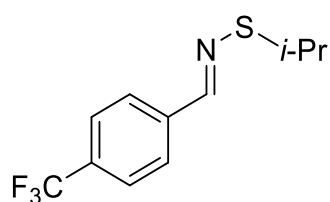

Synthesised from (4-(trifluoromethyl)phenyl)methanamine (0.860 mL, 6.00 mmol) using general procedure **2.1**. Purified by flash column chromatography on silica gel (eluent: hexane : DCM = 5:1); yellow oil (150 mg, 12% yield);  $^1\text{H}$  NMR (400 MHz, *Chloroform-d*)  $\delta$  8.47 (s, 1H), 7.79 – 7.54 (m, 4H), 3.61 – 3.47 (m, 1H), 1.42 (d,  $J$  = 7.0 Hz, 6H);  $^{13}\text{C}$  NMR (101 MHz, *Chloroform-d*)  $\delta$  154.1, 139.6, 131.2 (q,  $J$  = 40.4 Hz), 127.0, 125.6 (q,  $J$  = 3.8 Hz), 125.5 (q,  $J$  = 278.7 Hz), 40.9, 21.6; HRMS (ESI) calcd. for  $\text{C}_{11}\text{H}_{13}\text{F}_3\text{NS}$  ( $\text{MH}^+$ ): 248.0721, found 248.0725; IR (film):  $\nu_{\text{max}}/\text{cm}^{-1}$  2965, 1616, 1320, 1163, 1122, 1064, 832.

**(*E*)-*S*-isopropyl-*N*-(4-methoxybenzylidene)thiohydroxylamine (6f-*i*Pr)**

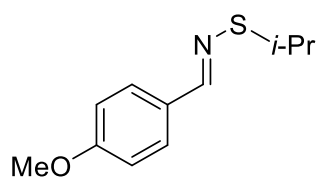

Synthesised from (4-methoxyphenyl)methanamine (0.860 mL, 6.00 mmol) using general procedure **2.1**. Purified by flash column chromatography on silica gel (eluent: hexane : DCM = 5:1); yellow oil (120 mg, 14% yield);  $^1\text{H}$  NMR (400 MHz, *Chloroform-d*)  $\delta$  8.40 (s, 1H), 7.56 (d,  $J$  = 8.8 Hz, 2H), 6.90 (d,  $J$  = 8.8 Hz, 2H), 3.83 (s, 3H), 3.54 (hept,  $J$  = 6.8 Hz, 1H), 1.41 (d,  $J$  = 6.8 Hz, 6H);  $^{13}\text{C}$  NMR (101 MHz, *Chloroform-d*)  $\delta$  161.0, 155.8, 130.1, 128.5, 114.1, 55.4, 40.5, 21.7. HRMS (ESI) calcd. for  $\text{C}_{11}\text{H}_{16}\text{ONS}$  ( $\text{MH}^+$ ): 210.0953, found 210.0950; IR (film):  $\nu_{\text{max}}/\text{cm}^{-1}$  2960, 1606, 1509, 1246, 1165, 1031, 829.

**(E)-S-isopropyl-N-(3-methoxybenzylidene)thiohydroxylamine (6g-*i*Pr)**

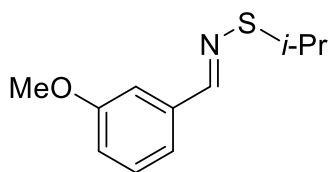

Synthesised from (3-methoxyphenyl)methanamine (0.860 mL, 6.00 mmol) using general procedure **2.1**. Purified by flash column chromatography on silica gel (eluent: hexane : DCM = 5:1); yellow oil (163 mg, 15% yield);  $^1\text{H}$  NMR (400 MHz, *Chloroform-d*)  $\delta$  8.43 (s, 1H), 7.29 (t,  $J$  = 7.9 Hz, 1H), 7.21 (dd,  $J$  = 2.7, 1.3 Hz, 1H), 7.15 (dt,  $J$  = 7.9, 1.3 Hz, 1H), 6.91 (ddd,  $J$  = 7.9, 2.7, 1.3 Hz, 1H), 3.84 (s, 3H), 3.56 (hept,  $J$  = 6.8 Hz, 1H), 1.42 (d,  $J$  = 6.8 Hz, 6H);  $^{13}\text{C}$  NMR (101 MHz, *Chloroform-d*)  $\delta$  159.8, 155.8, 138.1, 129.5, 120.0, 116.1, 110.9, 55.3, 40.5, 21.6; HRMS (ESI) calcd. for  $\text{C}_{11}\text{H}_{16}\text{ONS}$  ( $\text{MH}^+$ ): 210.0953, found 210.0937; IR (film):  $\nu_{\text{max}}/\text{cm}^{-1}$  2960, 1598, 1463, 1262, 1151, 1044, 779, 686.

**(E)-S-isopropyl-N-(naphthalen-1-ylmethylene)thiohydroxylamine (6h-*i*Pr)**

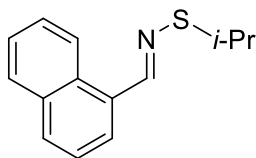

Synthesised from naphthalen-1-ylmethanamine (943 mg, 6.00 mmol) using general procedure **2.1**. Purified by flash column chromatography on silica gel (eluent: hexane : DCM = 5:1); yellow oil (29.0 mg, 3% yield);  $^1\text{H}$  NMR (400 MHz, *Chloroform-d*)  $\delta$  9.14 (s, 1H), 8.82 (d,  $J$  = 8.2 Hz, 1H), 7.87 (dd,  $J$  = 8.2, 4.3 Hz, 2H), 7.79 (d,  $J$  = 6.5 Hz, 1H), 7.59 – 7.46 (m, 3H), 3.65 (hept,  $J$  = 6.5 Hz, 1H), 1.49 (d,  $J$  = 6.5 Hz, 6H);  $^{13}\text{C}$  NMR (101 MHz, *Chloroform-d*)  $\delta$  156.1, 134.0, 132.2, 130.6, 130.5, 128.7, 127.8, 127.2, 126.1, 125.4, 124.4, 40.8, 21.9; HRMS (ESI) calcd. for  $\text{C}_{14}\text{H}_{16}\text{NS}$  ( $\text{MH}^+$ ): 230.1003, found 230.1002; IR (film):  $\nu_{\text{max}}/\text{cm}^{-1}$  2958, 1567, 1432, 1128, 854.

**(E)-S-isopropyl-N-(1-phenylethylidene)thiohydroxylamine (6i-*i*Pr)**

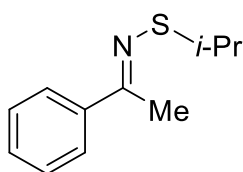

Synthesised from 1-phenylethan-1-amine (0.770 mL, 6.00 mmol) using general procedure **2.1**. Purified by flash column chromatography on silica gel (eluent: hexane : DCM = 5:1); yellow oil (240 mg, 31% yield);  $^1\text{H}$

NMR (400 MHz, *Chloroform-d*)  $\delta$  7.76 (dd,  $J$  = 8.0, 1.7 Hz, 2H), 7.45 – 7.32 (m, 3H), 3.54 (hept,  $J$  = 6.8 Hz, 1H), 2.37 (s, 3H), 1.48 (d,  $J$  = 6.8 Hz, 6H).  $^{13}\text{C}$  NMR (101 MHz, *Chloroform-d*)  $\delta$  159.8, 139.8, 128.9, 128.3, 125.9, 41.0, 21.8, 19.5; HRMS (ESI) calcd. for  $\text{C}_{11}\text{H}_{16}\text{NS}$  ( $\text{MH}^+$ ): 194.1003, found 194.0998; IR (film):  $\nu_{\text{max}}/\text{cm}^{-1}$  2960, 1444, 1363, 1238, 757, 689.

***S*-isopropyl-*N*-(1-(naphthalen-1-yl)ethylidene)thiohydroxylamine (6j-*i*Pr)**

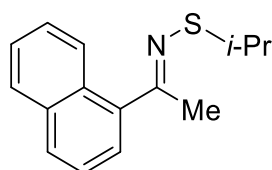

Synthesised from 1-(naphthalen-1-yl)ethan-1-amine (1.02 g, 6.00 mmol) using general procedure **2.1**. Purified by flash column chromatography on silica gel (eluent: hexane : DCM = 5:1); yellow oil (320 mg, 65% yield, *E/Z* 5:1);  $^1\text{H}$  NMR (400 MHz, *Chloroform-d*) *E* isomer:  $\delta$  8.22 – 8.17 (m, 1H), 7.89 – 7.82 (m, 2H), 7.52 – 7.44 (m, 4H), 3.58 (heptd,  $J$  = 6.8, 0.9 Hz, 1H), 2.50 (d,  $J$  = 0.9 Hz, 3H), 1.46 (dd,  $J$  = 6.8, 0.9 Hz, 6H); *Z* isomer:  $\delta$  7.93 – 7.89 (m, 1H), 7.70 – 7.64 (m, 1H), 7.56 – 7.52 (m, 4H), 7.28 (dt,  $J$  = 6.8, 1.0 Hz, 1H), 3.43 (heptd,  $J$  = 6.8, 1.0 Hz, 1H), 2.48 (d,  $J$  = 0.8 Hz, 3H), 1.32 – 1.30 (m, 6H);  $^{13}\text{C}$  NMR (101 MHz, *Chloroform-d*) *E* isomer:  $\delta$  163.3, 140.0, 134.1, 130.5, 128.9, 128.5, 126.4, 126.0, 125.9, 125.2, 125.2, 41.0, 31.7, 24.5, 22.0; *Z* isomer:  $\delta$  164.7, 139.1, 133.8, 130.5, 128.8, 128.7, 127.6, 126.7, 125.7, 124.9, 122.9, 40.6, 29.6, 22.8, 21.6; HRMS (ESI) calcd. for  $\text{C}_{15}\text{H}_{18}\text{NS}$  ( $\text{MH}^+$ ): 244.1154, found 244.1152; IR (film):  $\nu_{\text{max}}/\text{cm}^{-1}$  2960, 1508, 1237, 794, 769.

**(*E*)-*N*-(3,4-dihydronaphthalen-1(2H)-ylidene)-*S*-isopropylthiohydroxylamine (6k-*i*Pr)**

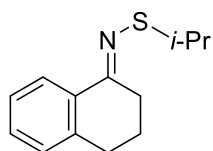

Synthesised from 1,2,3,4,4a,8a-hexahydronaphthalen-1-amine (0.900 mL, 6.00 mmol) using general procedure **2.1**. Purified by flash column chromatography on silica gel (eluent: hexane : DCM = 5:1); red oil (135 mg, 15% yield);  $^1\text{H}$  NMR (400 MHz, *Chloroform-d*)  $\delta$  8.13 – 8.00 (m, 1H), 7.24 – 7.19 (m, 2H), 7.14 – 7.09 (m, 1H), 3.49 (heptd,  $J$  = 6.8, 1.8 Hz, 1H), 2.78 (t,  $J$  = 6.8 Hz, 2H), 2.59 (td,  $J$  =



6.8, 1.8 Hz, 2H), 2.01 – 1.90 (m, 2H), 1.44 (dd,  $J = 6.8, 1.8$  Hz, 6H);  $^{13}\text{C}$  NMR (101 MHz, *Chloroform-d*)  $\delta$  159.6, 138.7, 134.2, 128.8, 128.3, 126.3, 125.0, 40.8, 31.9, 29.7, 22.2, 21.7; HRMS (ESI) calcd. for  $\text{C}_{13}\text{H}_{18}\text{NS}$  ( $\text{MH}^+$ ): 220.1154, found 220.1152; IR (film):  $\nu_{\text{max}}/\text{cm}^{-1}$  2928, 1451, 1237, 759.

**(*E*)-*S*-isopropyl-*N*-(pyridin-2-ylmethylene)thiohydroxylamine (6l-*i*Pr)**

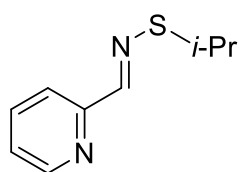

Synthesised from pyridin-2-ylmethanamine (0.620 mL, 6.00 mmol) using general procedure **2.1**. Purified by flash column chromatography on silica gel (eluent: DCM : MeOH = 50:1); brown oil (320 mg, 44% yield);  $^1\text{H}$

NMR (400 MHz, *Chloroform-d*)  $\delta$  8.59 – 8.58 (m, 1H), 8.54 (s, 1H), 7.88 (d,  $J = 7.8$  Hz, 1H), 7.70 (d,  $J = 7.8$  Hz, 1H), 7.26 – 7.21 (m, 1H), 3.59 (hept,  $J = 6.8$  Hz, 1H), 1.43 (d,  $J = 6.8$  Hz, 6H);  $^{13}\text{C}$  NMR (101 MHz, *Chloroform-d*)  $\delta$  156.3, 149.3, 136.3, 123.8, 120.2, 40.6, 21.4; HRMS (ESI) calcd. for  $\text{C}_9\text{H}_{13}\text{N}_2\text{S}$  ( $\text{MH}^+$ ): 181.0799, found 181.0792; IR (film):  $\nu_{\text{max}}/\text{cm}^{-1}$  2961, 1464, 1432, 768.

**(*E*)-*N*-benzylidene-*S*-(*tert*-butyl)thiohydroxylamine (6a-*t*Bu) <sup>[14]</sup>**

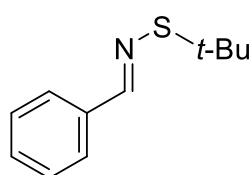

Synthesised from benzylamine (1.30 mL, 10.0 mmol) using general procedure **2.2**. Purified by flash column chromatography on silica gel (eluent: hexane : DCM = 5:1); yellow oil (350 mg, 36% yield over two

steps);  $^1\text{H}$  NMR (400 MHz, *Chloroform-d*)  $\delta$  8.47 (s, 1H), 7.68 – 7.58 (m, 2H), 7.44 – 7.32 (m, 3H), 1.47 (s, 9H);  $^{13}\text{C}$  NMR (101 MHz, *Chloroform-d*)  $\delta$  155.3, 137.0, 129.6, 128.5, 126.8, 47.0, 29.2.

**(E)-S-(tert-butyl)-N-(4-fluorobenzylidene)thiohydroxylamine (6b-*t*Bu)**

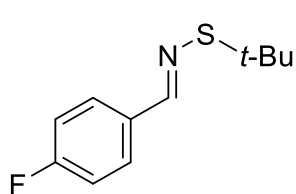

Synthesised from (4-fluorophenyl)methanamine (1.10 mL, 10.0 mmol) using general procedure **2.2**. Purified by flash column chromatography on silica gel (eluent: DCM : MeOH = 50:1); yellow oil (528 mg, 50% yield over two steps);  $^1\text{H}$  NMR (400 MHz, *Chloroform-d*)  $\delta$  8.43 (s, 1H), 7.62 (dd,  $J$  = 8.7, 5.6 Hz, 2H), 7.06 (t,  $J$  = 8.7 Hz, 2H), 1.46 (s, 9H);  $^{13}\text{C}$  NMR (101 MHz, *Chloroform-d*)  $\delta$  163.7 (d,  $J$  = 242.4 Hz), 154.0, 133.5 (d,  $J$  = 10.1 Hz), 128.7 (d,  $J$  = 10.1 Hz), 115.7 (d,  $J$  = 20.2 Hz), 47.1, 29.3; HRMS (ESI) calcd. for  $\text{C}_{11}\text{H}_{15}\text{FNS}$  ( $\text{MH}^+$ ): 212.0909, found 212.0904; IR (film):  $\nu_{\text{max}}/\text{cm}^{-1}$  2961, 1599, 1507, 1228, 1151, 832.

**(E)-S-(tert-butyl)-N-(4-chlorobenzylidene)thiohydroxylamine (6c-*t*Bu)**

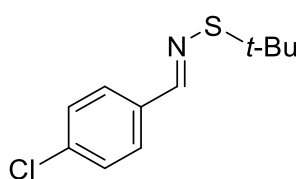

Synthesised from (4-chlorophenyl)methanamine (1.20 mL, 10.0 mmol) using general procedure **2.2**. Purified by flash column chromatography on silica gel (eluent: Hexane : DCM = 5:1); yellow oil (530 mg, 47% yield over two steps);  $^1\text{H}$  NMR (400 MHz, *Chloroform-d*)  $\delta$  8.40 (s, 1H), 7.54 (d,  $J$  = 8.6 Hz, 2H), 7.32 (d,  $J$  = 8.6 Hz, 2H), 1.44 (s, 9H);  $^{13}\text{C}$  NMR (101 MHz, *Chloroform-d*)  $\delta$  153.9, 135.5, 128.9, 128.0, 47.3, 29.3; HRMS (ESI) calcd. for  $\text{C}_{11}\text{H}_{15}^{35}\text{ClNS}$  ( $\text{MH}^+$ ): 228.0614, found 228.0608; IR (film):  $\nu_{\text{max}}/\text{cm}^{-1}$  2960, 1488, 1360, 1165, 1086, 818.

**(E)-N-(4-bromobenzylidene)-S-(tert-butyl)thiohydroxylamine (6d-*t*Bu)**

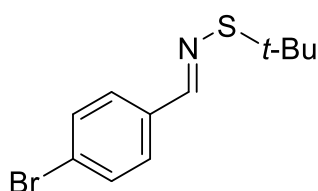

Synthesised from (4-bromophenyl)methanamine (1.80 g, 10.0 mmol) using general procedure **2.2**. Purified by flash column chromatography on silica gel (eluent: Hexane : DCM = 5:1); yellow oil (408 mg, 30% yield over two steps);  $^1\text{H}$  NMR (400 MHz, *Chloroform-d*)  $\delta$  8.40 (s, 1H), 7.52 – 7.47 (m, 4H), 1.46 (s, 9H);  $^{13}\text{C}$  NMR (101 MHz, *Chloroform-d*)  $\delta$  153.9, 135.9, 131.8,

128.2, 123.9, 47.3, 29.3; HRMS (ESI) calcd. for  $C_{11}H_{15}^{79}BrNS$  ( $MH^+$ ): 272.0109 and 274.0088, found 272.0103 and 274.0082; IR (film):  $\nu_{max}/cm^{-1}$  2959, 1485, 1360, 1165, 1069, 1008, 814.

**(E)-S-(tert-butyl)-N-(4-(trifluoromethyl)benzylidene)thiohydroxylamine (6e-*t*Bu)**

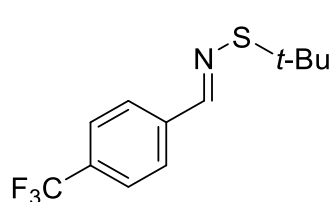

Synthesised from (4-(trifluoromethyl)phenyl)methanamine (1.40 mL, 10.0 mmol) using general procedure **2.2**. Purified by flash column chromatography on silica gel (eluent: hexane : DCM = 5:1); yellow oil (385 mg, 30% yield over two steps);  $^1H$  NMR (400 MHz, *Chloroform-d*)  $\delta$  8.49 (s, 1H), 7.73 (d,  $J$  = 8.1 Hz, 2H), 7.63 (d,  $J$  = 8.1 Hz, 2H), 1.47 (s, 9H);  $^{13}C$  NMR (101 MHz, *Chloroform-d*)  $\delta$  153.4, 139.8, 131.1 (q,  $J$  = 32.5 Hz), 126.9, 125.7 (q,  $J$  = 273.7 Hz), 125.62 (q,  $J$  = 3.8 Hz), 47.5, 29.3; HRMS (ESI) calcd. for  $C_{12}H_{15}F_3NS$  ( $MH^+$ ): 262.0877, found 262.0876; IR (film):  $\nu_{max}/cm^{-1}$  2963, 1616, 1320, 1163, 1122, 1064, 831.

**(E)-S-(tert-butyl)-N-(4-methoxybenzylidene)thiohydroxylamine (6f-*t*Bu)**

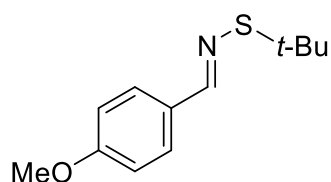

Synthesised from (4-methoxyphenyl)methanamine (1.30 mL, 10.0 mmol) using general procedure **2.2**. Purified by flash column chromatography on silica gel (eluent: hexane : DCM = 5:1); yellow oil (220 mg, 20% yield over two steps);  $^1H$  NMR (400 MHz, *Chloroform-d*)  $\delta$  8.41 (s, 1H), 7.58 (d,  $J$  = 8.8 Hz, 2H), 6.90 (d,  $J$  = 8.8 Hz, 2H), 3.83 (s, 3H), 1.45 (s, 9H);  $^{13}C$  NMR (101 MHz, *Chloroform-d*)  $\delta$  160.9, 155.0, 130.3, 128.3, 113.9, 55.3, 46.8, 29.2; HRMS (ESI) calcd. for  $C_{12}H_{18}NOS$  ( $MH^+$ ): 224.1103, found 224.1104; IR (film):  $\nu_{max}/cm^{-1}$  2959, 1606, 1509, 1246, 1163, 828.

**(E)-S-(tert-butyl)-N-(3-methoxybenzylidene)thiohydroxylamine (6g-*t*Bu)**

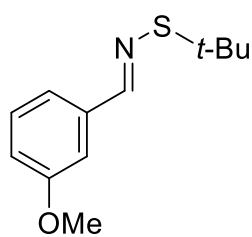

Synthesised from (3-methoxyphenyl)methanamine (1.30 mL, 10.0 mmol) using general procedure **2.2**. Purified by flash column chromatography on silica gel (eluent: hexane : DCM = 5:1); yellow oil (669 mg, 60% yield over two steps); <sup>1</sup>H NMR (400 MHz, *Chloroform-d*)

δ 8.42 (s, 1H), 7.32 – 7.12 (m, 3H), 6.95 – 6.84 (m, 1H), 3.82 (s, 3H), 1.45 (s, 9H); <sup>13</sup>C NMR (101 MHz, *Chloroform-d*) δ 159.9, 155.2, 138.4, 129.6, 120.0, 115.8, 111.2, 55.4, 47.1, 29.3; HRMS (ESI) calcd. for C<sub>12</sub>H<sub>18</sub>NOS (MH<sup>+</sup>): 224.1103, found 224.1096; IR (film): ν<sub>max</sub>/cm<sup>-1</sup> 2959, 1601, 1457, 1262, 1043, 779, 686.

**(E)-S-(tert-butyl)-N-(naphthalen-1-ylmethylene)thiohydroxylamine (6h-*t*Bu)**

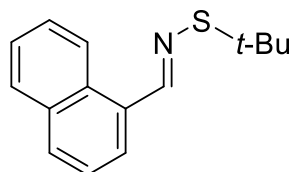

Synthesised from naphthalen-1-ylmethanamine (1.40 mL, 10.0 mmol) using general procedure **2.2**. Purified by flash column chromatography on silica gel (eluent: hexane : DCM = 5:1); yellow

oil (480 mg, 40% yield over two steps); <sup>1</sup>H NMR (400 MHz, *Chloroform-d*) δ 9.14 (s, 1H), 9.00 – 8.85 (m, 1H), 7.93 – 7.75 (m, 3H), 7.63 – 7.43 (m, 3H), 1.55 (s, 9H); <sup>13</sup>C NMR (101 MHz, *Chloroform-d*) δ 155.6, 134.0, 132.3, 130.6, 130.4, 128.7, 127.9, 127.2, 126.1, 125.4, 124.6, 47.3, 29.5; HRMS (ESI) calcd. for C<sub>15</sub>H<sub>18</sub>NS (MH<sup>+</sup>): 244.1154, found 244.1157; IR (film): ν<sub>max</sub>/cm<sup>-1</sup> 2959, 1454, 1360, 1164, 769.

**(E)-S-(tert-butyl)-N-(1-phenylethylidene)thiohydroxylamine (6i-*t*Bu)**

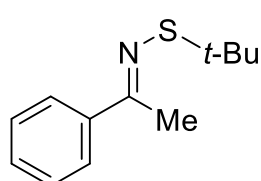

Synthesised from 1-phenylethan-1-amine (1.30 mL, 10.0 mmol) using general procedure **2.2**. Purified by flash column chromatography on silica gel (eluent: hexane : DCM = 5:1); yellow oil (1.00 g, 96% yield

over two steps); <sup>1</sup>H NMR (400 MHz, *Chloroform-d*) δ 7.86 – 7.68 (m, 2H), 7.47 – 7.30 (m,

3H), 2.34 (s, 3H), 1.49 (s, 9H);  $^{13}\text{C}$  NMR (101 MHz, *Chloroform-d*)  $\delta$  158.8, 139.9, 128.8, 128.3, 125.8, 46.8, 29.4, 19.5; HRMS (ESI) calcd. for  $\text{C}_{12}\text{H}_{18}\text{NS}$  ( $\text{MH}^+$ ): 208.1160, found 208.1157; IR (film):  $\nu_{\text{max}}/\text{cm}^{-1}$  2959, 1337, 800, 774.

**(*E*)-*S*-(*tert*-butyl)-*N*-(3,4-dihydronaphthalen-1(2H)-ylidene)thiohydroxylamine (6k-*t*Bu)**

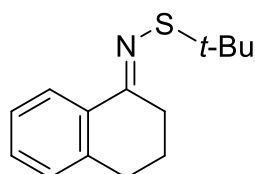

Synthesised from 1,2,3,4-tetrahydronaphthalen-1-amine (1.40 mL, 10.0 mmol) using general procedure **2.2**. Purified by flash column chromatography on silica gel (eluent: hexane : DCM = 5:1); yellow oil (620 mg, 53% yield over two steps);  $^1\text{H}$  NMR (400 MHz, *Chloroform-d*)  $\delta$  8.16 – 7.99 (m, 1H), 7.25 – 7.19 (m, 2H), 7.12 – 7.09 (m, 1H), 2.82 – 2.73 (m, 2H), 2.58 (t,  $J$  = 6.6 Hz, 2H), 2.00 – 1.88 (m, 2H), 1.48 (s, 9H);  $^{13}\text{C}$  NMR (101 MHz, *Chloroform-d*)  $\delta$  158.8, 138.8, 134.5, 128.8, 128.4, 126.4, 125.1, 46.7, 32.1, 29.8, 29.4, 22.3, 14.2; HRMS (ESI) calcd. for  $\text{C}_{14}\text{H}_{20}\text{NS}$  ( $\text{MH}^+$ ): 234.1311, found 234.1316; IR (film):  $\nu_{\text{max}}/\text{cm}^{-1}$  2957, 1453, 1359, 1163, 759, 730.

**(*E*)-*S*-(*tert*-butyl)-*N*-(pyridin-2-ylmethylene)thiohydroxylamine (6l-*t*Bu)**

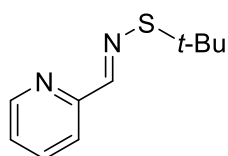

Synthesised from pyridin-2-ylmethanamine (1.10 g, 10.0 mmol) using general procedure **2.2**. Purified by flash column chromatography on silica gel (eluent: DCM : MeOH = 50:1); yellow oil (420 mg, 43% yield over two steps);  $^1\text{H}$  NMR (400 MHz, *Chloroform-d*)  $\delta$  8.58 – 8.53 (m, 2H), 7.94 – 7.91 (m, 1H), 7.71 – 7.67 (m, 1H), 7.25 – 7.20 (m, 1H), 1.46 (s, 9H);  $^{13}\text{C}$  NMR (101 MHz, *Chloroform-d*)  $\delta$  156.0, 154.8, 149.2, 136.3, 123.8, 120.0, 47.4, 29.2; HRMS (ESI) calcd. for  $\text{C}_{10}\text{H}_{14}\text{N}_2\text{NaS}$  ( $\text{MNa}^+$ ): 217.0770, found 217.0771; IR (film):  $\nu_{\text{max}}/\text{cm}^{-1}$  2960, 1567, 1461, 1432, 1361, 1164, 767.

***S*-(*tert*-butyl)-*N*-(thiophen-2-ylmethylene)thiohydroxylamine (6m-*t*Bu)**

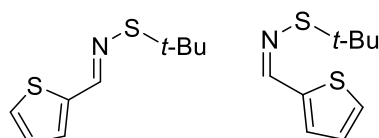

Synthesised from thiophen-2-ylmethanamine (1.00 mL, 10.0 mmol) using general procedure **2.2**. Purified by flash column

chromatography on silica gel (eluent: hexane : DCM = 5:1); yellow oil (650 mg, 65% yield over two steps, *E/Z* 10:3); *E* isomer:  $^1\text{H}$  NMR (400 MHz, *Chloroform-d*)  $\delta$  8.54 (s, 1H), 7.33 (dd,  $J$  = 5.0, 1.2 Hz, 1H), 7.12 (ddd,  $J$  = 3.6, 1.2, 0.6 Hz, 1H), 7.03 (ddd,  $J$  = 5.0, 3.6, 0.6 Hz, 1H), 1.44 (s, 9H); *Z* isomer:  $^1\text{H}$  NMR (400 MHz, *Chloroform-d*)  $\delta$  8.49 (s, 1H), 7.62 (ddd,  $J$  = 5.0, 1.2, 0.5 Hz, 1H), 7.47 (ddd,  $J$  = 3.8, 1.2, 0.5 Hz, 1H), 7.16 (dd,  $J$  = 5.0, 3.8 Hz, 1H), 1.48 (s, 9H); *E* isomer:  $^{13}\text{C}$  NMR (101 MHz, *Chloroform-d*)  $\delta$  149.3, 139.2, 128.1, 127.6, 127.3, 47.3, 29.2; *Z* isomer:  $^{13}\text{C}$  NMR (101 MHz, *Chloroform-d*)  $\delta$  145.8, 143.9, 131.6, 130.6, 48.3, 29.0; HRMS (ESI) calcd. for  $\text{C}_9\text{H}_{14}\text{NS}_2$  ( $\text{MH}^+$ ): 200.0562, found 200.0570; IR (film):  $\nu_{\text{max}}/\text{cm}^{-1}$  2959, 1360, 1163, 701.

***N*-((*E*)-((3*r*,5*r*,7*r*)-adamantan-1-yl)methylene)-*S*-(*tert*-butyl)thiohydroxylamine (6*n-t*Bu)**

Synthesised from ((3*r*,5*r*,7*r*)-adamantan-1-yl)methanamine (1.65 g, 10.0 mmol) using general

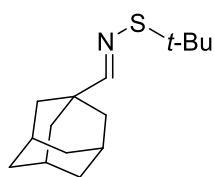

procedure **2.2**. Purified by flash column chromatography on silica gel (eluent: hexane : DCM = 5:1); yellow waxy solid (1.00 g, 81% yield over two steps);  $^1\text{H}$  NMR (400 MHz, *Chloroform-d*)  $\delta$  7.62 (s, 1H), 2.01 – 1.99

(m, 3H), 1.73 – 1.64 (m, 12H), 1.37 (s, 9H);  $^{13}\text{C}$  NMR (101 MHz, *Chloroform-d*)  $\delta$  167.9, 46.3, 40.8, 39.5, 36.9, 31.7, 30.7, 29.1, 28.2; HRMS (ESI) calcd. for  $\text{C}_{15}\text{H}_{26}\text{NS}$  ( $\text{MH}^+$ ): 252.1780, found 252.1782; IR (film):  $\nu_{\text{max}}/\text{cm}^{-1}$  2902, 2848, 1452, 1360, 1165, 739.

**(*R,E*)-*N*-benzylidenepropane-2-sulfinamide ((*R*)-12a) <sup>[15]</sup>**

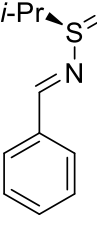 Synthesised from (*E*)-*N*-benzylidene-*S*-isopropylthiohydroxylamine (36.0 mg, 0.200 mmol) using general procedure **2.3**. Purified by flash column chromatography on silica gel (eluent: hexane : EtOAc = 10:1); yellow oil (20.0 mg, 51% yield);  $[\alpha]_{\text{D}}^{20} = -72.23$  ( $c = 1.0$ ,  $\text{CHCl}_3$ ), Lit.  $[\alpha]_{\text{D}}^{20} = -112$  ( $c = 1$ ,  $\text{CHCl}_3$ );  $^1\text{H}$  NMR (400 MHz, *Chloroform-d*)  $\delta$  8.59 (s, 1H), 7.88 – 7.82 (m, 2H), 7.56 – 7.44 (m, 3H), 2.98 (hept,  $J = 6.9$  Hz, 1H), 1.31 (d,  $J = 6.9$  Hz, 3H), 1.23 (d,  $J = 6.9$  Hz, 3H);  $^{13}\text{C}$  NMR (101 MHz, *Chloroform-d*)  $\delta$  162.5, 133.9, 132.5, 129.4, 128.9, 53.9, 14.7, 13.5; HRMS (ESI) calcd. for  $\text{C}_{10}\text{H}_{14}\text{NOS}$  ( $\text{MH}^+$ ): 196.0796, found 196.0791; IR (film):  $\nu_{\text{max}}/\text{cm}^{-1}$  2933, 1581, 1185, 802; HPLC data: 98% *ee*, determined by HPLC (IBN5 column, flow rate: 1.0 mL/min, hexane/propanol: 95:5):  $t_{\text{r}}(\text{minor}) = 9.01$  min,  $t_{\text{r}}(\text{major}) = 10.24$  min. See Section 4 for images depicting the HPLC traces.

**(*R,E*)-*N*-(4-fluorobenzylidene)propane-2-sulfinamide ((*R*)-12b)**

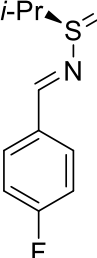 Synthesised from (*E*)-*N*-(4-fluorobenzylidene)-*S*-isopropylthiohydroxylamine (40.0 mg, 0.200 mmol) using general procedure **2.3**. Purified by flash column chromatography on silica gel (eluent: hexane : EtOAc = 10:1); yellow oil (30.0 mg, 70% yield);  $[\alpha]_{\text{D}}^{20} = -29.92$  ( $c = 1.0$ ,  $\text{CHCl}_3$ );  $^1\text{H}$  NMR (400 MHz, *Chloroform-d*)  $\delta$  8.54 (s, 1H), 7.96 – 7.79 (m, 2H), 7.25 – 7.09 (m, 2H), 2.96 (hept,  $J = 6.9$  Hz, 1H), 1.25 (dd,  $J = 35.1, 6.9$  Hz, 6H);  $^{13}\text{C}$  NMR (101 MHz, *Chloroform-d*)  $\delta$  165.4 (d,  $J = 254.3$  Hz), 161.2, 131.7 (d,  $J = 9.1$  Hz), 130.5 (d,  $J = 3.1$  Hz), 116.3 (d,  $J = 22.1$  Hz), 54.0, 14.8, 13.6;  $^{19}\text{F}$  NMR (376 MHz, *Chloroform-d*)  $\delta$  -105.69; HRMS (ESI) calcd. for  $\text{C}_{10}\text{H}_{12}\text{FNONaS}$  ( $\text{MNa}^+$ ): 236.0521, found 236.0514; IR (film):  $\nu_{\text{max}}/\text{cm}^{-1}$  2930, 1582, 1508, 1231, 1086; HPLC data: 99% *ee*, determined by HPLC (IBN5 column, flow rate: 1.0 mL/min,

hexane/propanol: 95:5): tr(minor)= 7.50 min, tr(major)= 10.54 min. See Section 4 for images depicting the HPLC traces.

**(*R,E*)-*N*-(4-chlorobenzylidene)propane-2-sulfinamide ((*R*)-12c)**

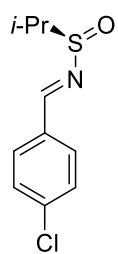

Synthesised from (*E*)-*S*-isopropyl-*N*-(4-chlorobenzylidene)thiohydroxylamine (43.0 mg, 0.200 mmol) using general procedure **2.3**. Purified by flash column chromatography on silica gel (eluent: hexane : EtOAc = 10:1); yellow oil (37.0 mg, 80% yield);  $[\alpha]_{\text{D}}^{20} = -56.37$  ( $c = 1.5$ ,  $\text{CHCl}_3$ );  $^1\text{H}$  NMR (400 MHz, *Chloroform-d*)  $\delta$  8.54 (s, 1H), 7.79 (d,  $J = 8.5$  Hz, 2H), 7.45 (d,  $J = 8.5$  Hz, 2H), 2.97 (hept,  $J = 6.9$  Hz, 1H), 1.30 (d,  $J = 6.9$  Hz, 3H), 1.22 (d,  $J = 6.8$  Hz, 3H);  $^{13}\text{C}$  NMR (101 MHz, *Chloroform-d*)  $\delta$  161.4, 138.8, 132.5, 130.6, 129.4, 54.0, 14.9, 13.7; HRMS (ESI) calcd. for  $\text{C}_{10}\text{H}_{13}^{35}\text{ClNOS}$  ( $\text{MH}^+$ ): 230.0406, found 230.0401; IR (film):  $\nu_{\text{max}}/\text{cm}^{-1}$  2924, 1591, 1085, 825; HPLC data: 98% *ee*, determined by HPLC (IBN5 column, flow rate: 1.0 mL/min, hexane/propanol: 95:5): tr(minor) = 7.81 min, tr(major) = 11.51 min. See Section 4 for images depicting the HPLC traces.

**(*R,E*)-*N*-(4-bromobenzylidene)propane-2-sulfinamide ((*R*)-12d)**

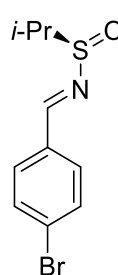

Synthesised from (*E*)-*N*-(4-bromobenzylidene)-*S*-isopropylthiohydroxylamine (26.0 mg, 0.100 mmol) using general procedure **2.3**. Purified by flash column chromatography on silica gel (eluent: hexane : EtOAc = 10:1); yellow oil (17.0 mg, 62% yield);  $[\alpha]_{\text{D}}^{20} = -13.57$  ( $c = 1.0$ ,  $\text{CHCl}_3$ );  $^1\text{H}$  NMR (400 MHz, *Chloroform-d*)  $\delta$  8.53 (s, 1H), 7.72 (d,  $J = 8.6$  Hz, 2H), 7.62 (d,  $J = 8.6$  Hz, 2H), 2.98 (hept,  $J = 6.9$  Hz, 1H), 1.31 (d,  $J = 6.9$  Hz, 3H), 1.22 (d,  $J = 6.9$  Hz, 3H);  $^{13}\text{C}$  NMR (101 MHz, *Chloroform-d*)  $\delta$  161.5, 132.9, 132.4, 130.8, 127.4, 54.0, 14.9, 13.7; HRMS (ESI) calcd. for  $\text{C}_{10}\text{H}_{12}^{79}\text{BrNONaS}$  ( $\text{MNa}^+$ ): 297.9700 and 295.9721, found 297.9694 and 295.9718; IR (film):  $\nu_{\text{max}}/\text{cm}^{-1}$  2924, 1608, 1088, 821; HPLC data: 99% *ee*, determined by HPLC (IBN5 column, flow rate: 1.0



mL/min, hexane/propanol: 95:5): tr(minor)= 8.44 min, tr(major)= 12.79 min. See Section 4 for images depicting the HPLC traces.

**(*R,E*)-*N*-(4-(trifluoromethyl)benzylidene)propane-2-sulfinamide ((*R*)-12e)**

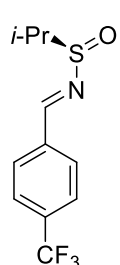

Synthesised from (*E*)-*S*-isopropyl-*N*-(4-trifluoromethylbenzylidene)thiohydroxylamine (50.0 mg, 0.200 mmol) using general procedure **2.3**. Purified by flash column chromatography on silica gel (eluent: hexane : EtOAc = 10:1); yellow oil (31 mg, 60% yield);  $[\alpha]_{\text{D}}^{20} = -100.14$  ( $c = 1.0$ ,  $\text{CHCl}_3$ );  $^1\text{H}$  NMR (400 MHz, *Chloroform-d*)  $\delta$  8.63 (s, 1H), 7.96 (d,  $J = 8.1$  Hz, 2H), 7.73 (d,  $J = 8.1$  Hz, 2H), 3.01 (hept,  $J = 6.9$  Hz, 1H), 1.32 (d,  $J = 6.9$  Hz, 3H), 1.23 (d,  $J = 6.9$  Hz, 3H);  $^{13}\text{C}$  NMR (101 MHz, *Chloroform-d*)  $\delta$  161.4, 136.8, 133.8 (q,  $J = 32.6$  Hz), 129.6, 126.1 (q,  $J = 3.8$  Hz), 123.2 (q,  $J = 274.2$  Hz), 54.1, 14.9, 13.7;  $^{19}\text{F}$  NMR (376 MHz, *Chloroform-d*)  $\delta$  -62.94; HRMS (ESI) calcd. for  $\text{C}_{11}\text{H}_{12}\text{F}_3\text{NONaS}$  ( $\text{MNa}^+$ ): 286.0489, found 286.0486; IR (film):  $\nu_{\text{max}}/\text{cm}^{-1}$  2933, 1322, 1121, 1065; HPLC data: 98% *ee*, determined by HPLC (IBN5 column, flow rate: 1.0 mL/min, hexane/propanol: 95:5): tr(minor) = 7.42 min, tr(major) = 15.36 min. See Section 4 for images depicting the HPLC traces.

**(*R,E*)-*N*-(4-methoxybenzylidene)propane-2-sulfinamide ((*R*)-12f) <sup>[15]</sup>**

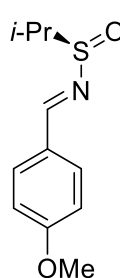

Synthesised from (*E*)-*S*-isopropyl-*N*-(4-methoxybenzylidene)thiohydroxylamine (23.0 mg, 0.100 mmol) using general procedure **2.3**. Purified by flash column chromatography on silica gel (eluent: hexane : EtOAc = 10:1); yellow oil (18.0 mg, 74% yield);  $[\alpha]_{\text{D}}^{20} = -34.84$  ( $c = 1.0$ ,  $\text{CHCl}_3$ ), Lit.  $[\alpha]_{\text{D}}^{20} = 71$  for the opposite *S* isomer ( $c = 1$ ,  $\text{CHCl}_3$ );  $^1\text{H}$  NMR (400 MHz, *Chloroform-d*)  $\delta$  8.51 (s, 1H), 7.80 (d,  $J = 8.7$  Hz, 2H), 6.97 (d,  $J = 8.7$  Hz, 2H), 3.87 (s, 3H), 2.94 (hept,  $J = 6.9$  Hz, 1H), 1.30 (d,  $J = 6.9$  Hz, 3H), 1.21 (d,  $J = 6.9$  Hz, 3H);  $^{13}\text{C}$  NMR (101 MHz, *Chloroform-d*)  $\delta$  163.1, 161.6, 131.3, 127.2, 114.4, 55.5, 53.9, 14.8, 13.5; HRMS (ESI) calcd. for  $\text{C}_{11}\text{H}_{16}\text{NO}_2\text{S}$  ( $\text{MH}^+$ ): 226.0902, found

226.0897; IR (film):  $\nu_{\text{max}}/\text{cm}^{-1}$  2965, 1594, 1568, 1511, 1253, 1028; HPLC data: 98% *ee*, determined by HPLC (IBN5 column, flow rate: 1.0 mL/min, hexane/propanol: 95:5):  $t_{\text{r}}(\text{minor}) = 10.05$  min,  $t_{\text{r}}(\text{major}) = 12.57$  min. See Section 4 for images depicting the HPLC traces.

**(*R,E*)-*N*-(3-methoxybenzylidene)propane-2-sulfinamide ((*R*)-12g)<sup>[16]</sup>**

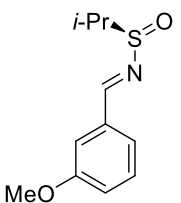 Synthesised from (*E*)-*S*-isopropyl-*N*-(3-methoxybenzylidene)thiohydroxylamine (42.0 mg, 0.200 mmol) using general procedure **2.3**. Purified by flash column chromatography on silica gel (eluent: hexane : EtOAc = 10:1); yellow oil (25.0 mg, 56% yield);  $[\alpha]_{\text{D}}^{20} = -47.78$  ( $c = 1.0$ ,  $\text{CHCl}_3$ ), Lit.  $[\alpha]_{\text{D}}^{20} = -74.8$  ( $c = 1$ ,  $\text{CHCl}_3$ );  $^1\text{H}$  NMR (400 MHz, *Chloroform-d*)  $\delta$  8.55 (s, 1H), 7.42 – 7.34 (m, 3H), 7.07 (dt,  $J = 6.9, 2.7$  Hz, 1H), 3.86 (s, 3H), 2.98 (hept,  $J = 6.9$  Hz, 1H), 1.31 (d,  $J = 6.9$  Hz, 3H), 1.22 (d,  $J = 6.9$  Hz, 3H);  $^{13}\text{C}$  NMR (101 MHz, *Chloroform-d*)  $\delta$  162.4, 160.0, 135.2, 130.0, 122.6, 119.0, 112.9, 55.4, 53.8, 14.8, 13.5; HRMS (ESI) calcd. for  $\text{C}_{11}\text{H}_{15}\text{NO}_2\text{NaS}$  ( $\text{MNa}^+$ ): 248.0721, found 248.0717; IR (film):  $\nu_{\text{max}}/\text{cm}^{-1}$  2965, 1607, 1577, 1266, 1085; HPLC data: 94% *ee*, determined by HPLC (IBN5 column, flow rate: 1.0 mL/min, hexane/propanol: 95:5):  $t_{\text{r}}(\text{minor}) = 9.14$  min,  $t_{\text{r}}(\text{major}) = 11.22$  min. See Section 4 for images depicting the HPLC traces.

**(*R,E*)-*N*-(naphthalen-1-ylmethylene)propane-2-sulfinamide ((*R*)-12h)**

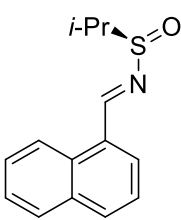 Synthesised from (*E*)-*S*-isopropyl-*N*-(naphthalen-1-ylmethylene)thiohydroxylamine (23.0 mg, 0.100 mmol) using general procedure **2.3**. Purified by flash column chromatography on silica gel (eluent: hexane : EtOAc = 10:1); yellow oil (11.0 mg, 45% yield);  $[\alpha]_{\text{D}}^{20} = -2.08$  ( $c = 1.0$ ,  $\text{CHCl}_3$ );  $^1\text{H}$  NMR (400 MHz, *Chloroform-d*)  $\delta$  9.17 (s, 1H), 9.02 (dd,  $J = 8.5, 1.1$  Hz, 1H),

8.13 – 7.99 (m, 2H), 7.93 (d,  $J = 8.5$  Hz, 1H), 7.71 – 7.56 (m, 3H), 3.06 (hept,  $J = 6.9$  Hz, 1H), 1.37 (d,  $J = 6.9$  Hz, 3H), 1.29 (d,  $J = 6.9$  Hz, 3H);  $^{13}\text{C}$  NMR (101 MHz, *Chloroform-d*)  $\delta$  162.4, 134.0, 133.4, 132.0, 131.3, 129.4, 128.9, 128.1, 126.6, 125.3, 124.5, 54.1, 14.9, 13.8; HRMS (ESI) calcd. for  $\text{C}_{14}\text{H}_{15}\text{NONaS}$  ( $\text{MNa}^+$ ): 268.0772, found 268.0768; IR (film):  $\nu_{\text{max}}/\text{cm}^{-1}$  2927, 1582, 1087, 774; HPLC data: 93% *ee*, determined by HPLC (IC column, flow rate: 1.0 mL/min, hexane/propanol: 95:5):  $\text{tr}(\text{minor}) = 24.51$  min,  $\text{tr}(\text{major}) = 22.23$  min. See Section 4 for images depicting the HPLC traces.

**(*R,E*)-*N*-(1-phenylethylidene)propane-2-sulfinamide ((*R*)-12i)**

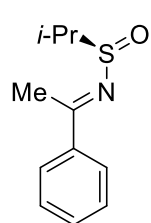

Synthesised from (*E*)-*S*-isopropyl-*N*-(1-phenylethylidene)thiohydroxylamine (40.0 mg, 0.200 mmol) using general procedure **2.3**. Purified by flash column chromatography on silica gel (eluent: hexane : EtOAc = 10:1); yellow oil (31.0 mg, 74% yield);  $[\alpha]_{\text{D}}^{20} = -6.4$  ( $c = 1.0$ ,  $\text{CHCl}_3$ );  $^1\text{H}$  NMR (400 MHz, *Chloroform-d*)  $\delta$  7.89 (d,  $J = 7.3$  Hz, 2H), 7.52 – 7.39 (m, 3H), 3.01 (hept,  $J = 6.9$  Hz, 1H), 2.76 (s, 3H), 1.35 (d,  $J = 4.1$  Hz, 1H), 1.34 (d,  $J = 4.1$  Hz, 1H);  $^{13}\text{C}$  NMR (101 MHz, *Chloroform-d*)  $\delta$  176.2, 138.6, 131.7, 128.5, 127.2, 54.7, 19.8, 14.7, 14.4; HRMS (ESI) calcd. for  $\text{C}_{11}\text{H}_{15}\text{NNaOS}$  ( $\text{MNa}^+$ ): 232.0772, found 232.0767; IR (film):  $\nu_{\text{max}}/\text{cm}^{-1}$  2985, 1565, 1460, 1224, 785; HPLC data: 97% *ee*, determined by HPLC (IBN5 column, flow rate: 1.0 mL/min, hexane/propanol: 95:5):  $\text{tr}(\text{minor}) = 12.07$  min,  $\text{tr}(\text{major}) = 10.51$  min. See Section 4 for images depicting the HPLC traces.

**(*R*)-*N*-(1-(naphthalen-1-yl)ethylidene)propane-2-sulfinamide ((*R*)-12j)**

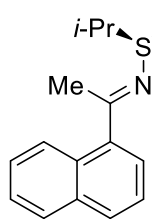

Synthesised from *S*-isopropyl-*N*-(1-(naphthalen-1-yl)ethylidene)thiohydroxylamine (122 mg, 0.500 mmol) using general procedure **2.3**. Purified by flash column chromatography on silica gel (eluent: hexane : EtOAc = 10:1); yellow oil (45.0 mg, 35% yield, *E/Z* 2:1);  $[\alpha]_{\text{D}}^{20} = -40.3$  ( $c = 1.0$ ,

CHCl<sub>3</sub>); <sup>1</sup>H NMR (400 MHz, *Chloroform-d*) δ 8.23 – 8.15 (m, 1H, *Z* isomer), 7.91 – 7.89 (m, 3H, *E+Z* isomer), 7.60 – 7.42 (m, 6H, *E+Z* isomer), 3.06 (hept, *J* = 6.9 Hz, 1H, *E* isomer), 2.87 (s, 3H, *E* isomer), 2.79 (p, *J* = 7.4 Hz, 3H, *Z* isomer), 2.64 (s, 3H, *Z* isomer), 1.36 (d, *J* = 1.9 Hz, 3H, *E* isomer), 1.34 (d, *J* = 1.9 Hz, 3H, *E* isomer), 1.23 (d, *J* = 7.0 Hz, 3H, *Z* isomer), 1.16 (d, *J* = 7.0 Hz, 3H, *Z* isomer); <sup>13</sup>C NMR (101 MHz, *Chloroform-d*) *E* isomer: δ 181.1, 139.0, 133.8, 130.2, 128.6, 126.9, 126.2, 125.1, 125.0, 124.9, 54.4, 24.9, 14.9, 14.1; *Z* isomer: δ 133.2, 129.4, 129.3, 129.0, 126.4, 123.9, 123.6, 122.4, 53.6, 30.7, 13.9 (two peaks missing from this isomer); HRMS (ESI) calcd. for C<sub>15</sub>H<sub>17</sub>NONaS (MNa<sup>+</sup>): 282.0929, found 282.0926; IR (film): ν<sub>max</sub>/cm<sup>-1</sup> 2926, 1738, 1237, 1045, 730; HPLC data: 99% *ee*, determined by HPLC (IBN5 column, flow rate: 1.0 mL/min, hexane/propanol: 95:5): tr(minor) = 15.86 min, tr(major) = 14.54 min. See Section 4 for images depicting the HPLC traces.

**(*R,E*)-*N*-(3,4-dihydronaphthalen-1(2H)-ylidene)propane-2-sulfinamide ((*R*)-12k)**

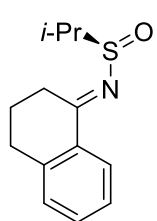

Synthesised from (*E*)-*N*-(3,4-dihydronaphthalen-1(2H)-ylidene)-*S*-isopropylthiohydroxylamine (22.0 mg, 0.100 mmol) using general procedure

**2.3.** Purified by flash column chromatography on silica gel (eluent: hexane : EtOAc = 10:1); yellow oil (21.0 mg, 89% yield); [α]<sub>D</sub><sup>20</sup> = 1.94 (c = 0.5, CHCl<sub>3</sub>);

<sup>1</sup>H NMR (400 MHz, *Chloroform-d*) δ 8.18 (dd, *J* = 7.8, 1.4 Hz, 1H), 7.39 (td, *J* = 7.8, 1.4 Hz, 1H), 7.28 – 7.23 (m, 2H), 7.19 (dd, *J* = 7.8, 1.4 Hz, 1H), 3.28 (ddd, *J* = 17.4, 9.0, 4.9 Hz, 1H), 3.07 – 2.96 (m, 2H), 2.90 – 2.85 (m, 2H), 2.09 – 1.92 (m, 2H), 1.36 (d, *J* = 4.8 Hz, 3H), 1.34 (d, *J* = 4.8 Hz, 3H); <sup>13</sup>C NMR (101 MHz, *Chloroform-d*) δ 176.8, 142.3, 132.9, 132.1, 129.0, 127.2, 126.6, 54.7, 32.4, 29.6, 22.7, 14.7, 14.6; HRMS (ESI) calcd. for C<sub>13</sub>H<sub>17</sub>NONaS (MNa<sup>+</sup>): 258.0929, found 258.0926; IR (film): ν<sub>max</sub>/cm<sup>-1</sup> 2927, 1583, 1509, 1231, 1087; HPLC data: 93% *ee*, determined by HPLC (IC column, flow rate: 1.0 mL/min, hexane/propanol: 95:5):

tr(minor)= 14.70 min, tr(major)= 10.75 min. See Section 4 for images depicting the HPLC traces.

**(*R,E*)-*N*-(pyridin-2-ylmethylene)propane-2-sulfinamide ((*R*)-12l)**

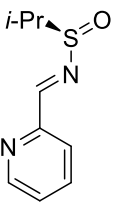 Synthesised from (*E*)-*S*-isopropyl-*N*-(pyridin-2-ylmethylene)thiohydroxylamine (36.0 mg, 0.200 mmol) using general procedure **2.3**. Purified by flash column chromatography on silica gel (eluent: DCM : MeOH = 25:1); brown oil (28.0 mg, 71% yield);  $[\alpha]_{\text{D}}^{20} = -67.66$  ( $c = 1.0$ ,  $\text{CHCl}_3$ );  $^1\text{H}$  NMR (400 MHz, *Chloroform-d*)  $\delta$  8.75 (ddd,  $J = 4.8, 1.2, 0.9$  Hz, 1H), 8.69 (s, 1H), 7.98 (dt,  $J = 7.7, 1.2$  Hz, 1H), 7.87 – 7.77 (m, 1H), 7.40 (ddd,  $J = 7.7, 4.8, 1.2$  Hz, 1H), 3.05 (hept,  $J = 6.9$  Hz, 1H), 1.33 (d,  $J = 6.9$  Hz, 3H), 1.21 (d,  $J = 6.9$  Hz, 3H);  $^{13}\text{C}$  NMR (101 MHz, *Chloroform-d*)  $\delta$  163.4, 152.3, 150.4, 136.9, 126.1, 123.7, 53.8, 15.2, 13.4; HRMS (ESI) calcd. for  $\text{C}_9\text{H}_{13}\text{N}_2\text{OS}$  ( $\text{MH}^+$ ): 197.0749, found 197.0743; IR (film):  $\nu_{\text{max}}/\text{cm}^{-1}$  2988, 1587, 1464, 1124, 785; HPLC data: 90% *ee*, determined by HPLC (IBN5 column, flow rate: 1.0 mL/min, hexane/propanol: 95:5): tr(minor) = 15.75 min, tr(major) = 18.34 min. See Section 4 for images depicting the HPLC traces.

**(*S,E*)-*N*-benzylidene-2-methylpropane-2-sulfinamide ((*S*)-13a) <sup>[17]</sup>**

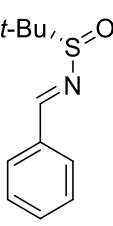 Synthesised from (*E*)-*N*-benzylidene-*S*-(*tert*-butyl)thiohydroxylamine (40.0 mg, 0.200 mmol) using general procedure **2.4**. Purified by flash column chromatography on silica gel (eluent: hexane : EtOAc = 10:1); yellow oil (37.0 mg, 88% yield);  $[\alpha]_{\text{D}}^{20} = 75.62$  ( $c = 1$ ,  $\text{CHCl}_3$ ), Lit.  $[\alpha]_{\text{D}}^{20} = 122.38$  ( $c = 1$ ,  $\text{CHCl}_3$ );  $^1\text{H}$  NMR (400 MHz, *Chloroform-d*)  $\delta$  8.59 (s, 1H), 7.85 (dt,  $J = 6.7, 1.6$  Hz, 2H), 7.57 – 7.43 (m, 3H), 1.26 (s, 9H);  $^{13}\text{C}$  NMR (101 MHz, *Chloroform-d*)  $\delta$  162.8, 134.2, 132.5, 129.5, 129.0, 57.9, 22.7; HPLC data: 99% *ee*, determined by HPLC (IC column, flow rate: 1.0 mL/min, hexane/propanol: 95:5): tr(minor) = 14.45 min, tr(major) = 13.60 min. See Section 4 for images depicting the HPLC traces.

**(*S,E*)-*N*-(4-fluorobenzylidene)-2-methylpropane-2-sulfinamide ((*S*)-13b)** <sup>[18]</sup>

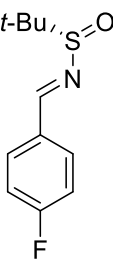 Synthesised from (*E*)-*S*-(*tert*-butyl)-*N*-(4-fluorobenzylidene)thiohydroxylamine (43.0 mg, 0.200 mmol) using general procedure 2.4. Purified by flash column chromatography on silica gel (eluent: hexane : EtOAc = 10:1); colourless oil (32.0 mg, 70% yield);  $[\alpha]_{\text{D}}^{20} = 117.66$  ( $c = 1.0$ ,  $\text{CHCl}_3$ );  $^1\text{H}$  NMR (400 MHz, *Chloroform-d*)  $\delta$  8.54 (s, 1H), 7.86 (dd,  $J = 8.7, 5.4$  Hz, 2H), 7.15 (t,  $J = 8.7$  Hz, 2H), 1.25 (s, 9H);  $^{13}\text{C}$  NMR (101 MHz, *Chloroform-d*)  $\delta$  165.3 (d,  $J = 254.0$  Hz), 161.4, 131.6 (d,  $J = 9.1$  Hz), 130.6 (d,  $J = 2.9$  Hz), 116.3 (d,  $J = 22.2$  Hz), 57.9, 22.7;  $^{19}\text{F}$  NMR (376 MHz, *Chloroform-d*)  $\delta$  -105.8; HPLC data: 94% *ee*, determined by HPLC (IC column, flow rate: 1.0 mL/min, hexane/propanol: 95:5):  $\text{tr}(\text{minor}) = 14.49$  min,  $\text{tr}(\text{major}) = 13.39$  min. See Section 4 for images depicting the HPLC traces.

**(*S,E*)-*N*-(4-chlorobenzylidene)-2-methylpropane-2-sulfinamide ((*S*)-13c)** <sup>[17]</sup>

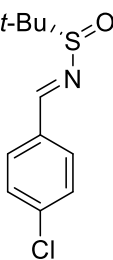 Synthesised from (*E*)-*S*-(*tert*-butyl)-*N*-(4-chlorobenzylidene)thiohydroxylamine (45.0 mg, 0.200 mmol) using general procedure 2.4. Purified by flash column chromatography on silica gel (eluent: hexane : EtOAc = 10:1); colourless oil (39.0 mg, 80% yield);  $[\alpha]_{\text{D}}^{20} = 67.17$  ( $c = 1.0$ ,  $\text{CHCl}_3$ ), Lit.  $[\alpha]_{\text{D}}^{20} = 77.1$  ( $c = 1$ ,  $\text{CHCl}_3$ );  $^1\text{H}$  NMR (400 MHz, *Chloroform-d*)  $\delta$  8.54 (s, 1H), 7.78 (d,  $J = 8.6$  Hz, 2H), 7.44 (d,  $J = 8.6$  Hz, 2H), 1.25 (s, 9H);  $^{13}\text{C}$  NMR (101 MHz, *Chloroform-d*)  $\delta$  161.4, 138.6, 132.5, 130.5, 129.3, 129.3, 57.9, 22.6; HPLC data: 98% *ee*, determined by HPLC (IC column, flow rate: 1.0 mL/min, hexane/propanol: 95:5):  $\text{tr}(\text{minor}) = 15.02$  min,  $\text{tr}(\text{major}) = 13.78$  min. See Section 4 for images depicting the HPLC traces.

**(*S,E*)-*N*-(4-bromobenzylidene)-2-methylpropane-2-sulfinamide ((*S*)-13d)** <sup>[19]</sup>

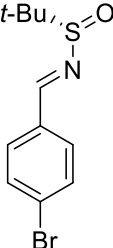 Synthesised from (*E*)-*S*-(*tert*-butyl)-*N*-(4-bromobenzylidene)thiohydroxylamine (55.0 mg, 0.200 mmol) using general procedure 2.4. Purified by flash column chromatography on silica gel (eluent: hexane : EtOAc = 10:1); colourless oil (38.0 mg, 66% yield);  $[\alpha]_{\text{D}}^{20} = 74.58$  ( $c = 1.0$ ,  $\text{CHCl}_3$ );  $^1\text{H}$  NMR (400 MHz, *Chloroform-d*)  $\delta$  8.53 (s, 1H), 7.71 (d,  $J = 8.5$  Hz, 2H), 7.61 (d,  $J = 8.5$  Hz, 2H), 1.26 (s, 9H);  $^{13}\text{C}$  NMR (101 MHz, *Chloroform-d*)  $\delta$  161.7, 133.0, 132.4, 130.8, 127.3, 58.0, 22.7; HPLC data: 99% *ee*, determined by HPLC (IC column, flow rate: 1.0 mL/min, hexane/propanol: 95:5):  $\text{tr}(\text{minor}) = 13.46$  min,  $\text{tr}(\text{major}) = 14.60$  min. See Section 4 for images depicting the HPLC traces.

**(*S,E*)-2-methyl-*N*-(4-(trifluoromethyl)benzylidene)propane-2-sulfinamide ((*S*)-13e)** <sup>[20]</sup>

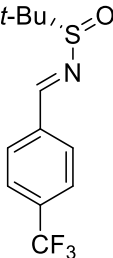 Synthesised from (*E*)-*S*-(*tert*-butyl)-*N*-(4-trifluoromethylbenzylidene)thiohydroxylamine (53.0 mg, 0.200 mmol) using general procedure 2.4. Purified by flash column chromatography on silica gel (eluent: hexane : EtOAc = 10:1); colourless oil (30.0 mg, 54% yield);  $[\alpha]_{\text{D}}^{20} = 77.42$  ( $c = 1.0$ ,  $\text{CHCl}_3$ ), Lit.  $[\alpha]_{\text{D}}^{20} = 74.9$  ( $c = 1$ ,  $\text{CHCl}_3$ );  $^1\text{H}$  NMR (400 MHz, *Chloroform-d*)  $\delta$  8.63 (s, 1H), 7.97 (d,  $J = 8.0$  Hz, 2H), 7.74 (d,  $J = 8.0$  Hz, 2H), 1.28 (s, 9H);  $^{13}\text{C}$  NMR (101 MHz, *Chloroform-d*)  $\delta$  161.6, 136.9, 133.7 (q,  $J = 32.8$  Hz), 129.6, 126.0 (q,  $J = 3.8$  Hz), 125.8 (q,  $J = 273.7$  Hz), 58.3, 22.7;  $^{19}\text{F}$  NMR (376 MHz, *Chloroform-d*)  $\delta$  -62.9; HPLC data: 98% *ee*, determined by HPLC (IC column, flow rate: 1.0 mL/min, hexane/propanol: 95:5):  $\text{tr}(\text{minor}) = 11.01$  min,  $\text{tr}(\text{major}) = 9.44$  min. See Section 4 for images depicting the HPLC traces.

**(*S,E*)-*N*-(4-methoxybenzylidene)-2-methylpropane-2-sulfinamide ((*S*)-13f)** <sup>[21]</sup>

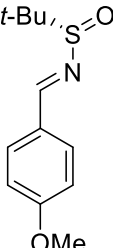 Synthesised from (*E*)-*S*-(*tert*-butyl)-*N*-(4-methoxybenzylidene)thiohydroxylamine (45.0 mg, 0.200 mmol) using general procedure 2.4. Purified by flash column chromatography on silica gel (eluent: hexane : EtOAc = 10:1); yellow oil (40.0 mg, 83% yield);  $[\alpha]_{\text{D}}^{20} = 92.11$  ( $c = 1$ ,  $\text{CHCl}_3$ ), Lit.  $[\alpha]_{\text{D}}^{20} = 45.4$  ( $c = 1$ ,  $\text{CH}_2\text{Cl}_2$ );  $^1\text{H}$  NMR (400 MHz, *Chloroform-d*)  $\delta$  8.50 (s, 1H), 7.80 (d,  $J = 9.0$  Hz, 2H), 6.96 (d,  $J = 9.0$  Hz, 2H), 3.86 (s, 3H), 1.24 (s, 9H);  $^{13}\text{C}$  NMR (101 MHz, *Chloroform-d*)  $\delta$  163.0, 161.7, 131.2, 127.3, 114.3, 57.5, 55.5, 22.5; HPLC data: 96% *ee*, determined by HPLC (AD-H column, flow rate: 1.0 mL/min, hexane/propanol: 95:5):  $\text{tr}(\text{minor}) = 14.92$  min,  $\text{tr}(\text{major}) = 15.61$  min. See Section 4 for images depicting the HPLC traces.

**(*S,E*)-*N*-(3-methoxybenzylidene)-2-methylpropane-2-sulfinamide ((*S*)-13g)** <sup>[17]</sup>

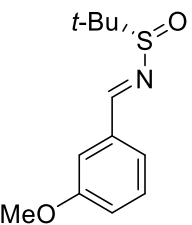 Synthesised from (*E*)-*S*-(*tert*-butyl)-*N*-(3-methoxybenzylidene)thiohydroxylamine (45.0 mg, 0.200 mmol) using general procedure 2.4. Purified by flash column chromatography on silica gel (eluent: hexane : EtOAc = 10:1); yellow oil (35.0 mg, 72% yield);  $[\alpha]_{\text{D}}^{20} = 86.70$  ( $c = 1$ ,  $\text{CHCl}_3$ ), Lit.  $[\alpha]_{\text{D}}^{20} = 76.7$  ( $c = 1$ ,  $\text{CHCl}_3$ );  $^1\text{H}$  NMR (400 MHz, *Chloroform-d*)  $\delta$  8.55 (s, 1H), 7.43 – 7.35 (m, 3H), 7.12 – 7.03 (m, 1H), 3.86 (s, 3H), 1.26 (s, 9H);  $^{13}\text{C}$  NMR (101 MHz, *Chloroform-d*)  $\delta$  162.6, 160.0, 135.4, 130.0, 122.5, 118.8, 113.1, 57.8, 55.4, 22.6; HPLC data: 96% *ee*, determined by HPLC (AD-H column, flow rate: 1.0 mL/min, hexane/propanol: 95:5):  $\text{tr}(\text{minor}) = 10.40$  min,  $\text{tr}(\text{major}) = 9.59$  min. See Section 4 for images depicting the HPLC traces.



**(*S,E*)-2-methyl-*N*-(naphthalen-1-ylmethylene)propane-2-sulfinamide ((*S*)-13h)** <sup>[22]</sup>

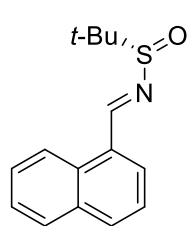

Synthesised from (*E*)-*S*-(*tert*-butyl)-*N*-(naphthalen-1-ylmethylene)thiohydroxylamine (50.0 mg, 0.200 mmol) using general procedure **2.4**. Purified by flash column chromatography on silica gel (eluent: hexane : EtOAc = 10:1); colourless oil (28.0 mg, 55% yield);  $[\alpha]_{\text{D}}^{20} = 6.02$  ( $c = 1.0$ ,  $\text{CHCl}_3$ ), Lit.  $[\alpha]_{\text{D}}^{20} = 1.45$  ( $c = 1$ ,  $\text{CHCl}_3$ );  $^1\text{H}$  NMR (400 MHz, *Chloroform-d*)  $\delta$  9.16 (s, 1H), 9.04 (d,  $J = 8.5$  Hz, 1H), 8.05 (d,  $J = 7.4$  Hz, 1H), 8.02 (d,  $J = 8.5$  Hz, 1H); 7.93 (d,  $J = 7.7$  Hz, 1H), 7.67 – 7.62 (m, 1H), 7.61 – 7.56 (m, 2H), 1.33 (s, 9H);  $^{13}\text{C}$  NMR (101 MHz, *Chloroform-d*)  $\delta$  162.6, 134.0, 133.4, 132.1, 131.3, 129.5, 128.9, 128.1, 126.6, 125.3, 124.5, 57.8, 22.7; HPLC data: 95% *ee*, determined by HPLC (IBN5 column, flow rate: 1.0 mL/min, hexane/propanol: 95:5):  $t_{\text{r}}(\text{minor}) = 9.74$  min,  $t_{\text{r}}(\text{major}) = 7.79$  min. See Section 4 for images depicting the HPLC traces.

**(*S,E*)-2-methyl-*N*-(1-phenylethylidene)propane-2-sulfinamide ((*S*)-13i)** <sup>[23]</sup>

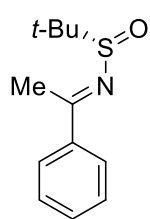

Synthesised from (*E*)-*S*-(*tert*-butyl)-*N*-(1-phenylethylidene)thiohydroxylamine (42.0 mg, 0.200 mmol) using general procedure **2.4**. Purified by flash column chromatography on silica gel (eluent: hexane : EtOAc = 10:1); colourless oil (27.0 mg, 61% yield);  $[\alpha]_{\text{D}}^{20} = 5.19$  ( $c = 1.0$ ,  $\text{CHCl}_3$ ), Lit.  $[\alpha]_{\text{D}}^{20} = 13$  ( $c = 1.03$ ,  $\text{CH}_2\text{Cl}_2$ );  $^1\text{H}$  NMR (400 MHz, *Chloroform-d*)  $\delta$  7.89 (d,  $J = 7.3$  Hz, 2H), 7.54 – 7.39 (m, 3H), 2.77 (s, 3H), 1.32 (s, 9H);  $^{13}\text{C}$  NMR (101 MHz, *Chloroform-d*)  $\delta$  176.5, 138.9, 131.8, 128.6, 127.3, 57.5, 22.6, 19.9; HPLC data: 98% *ee*, determined by HPLC (IC column, flow rate: 1.0 mL/min, hexane/propanol: 95:5):  $t_{\text{r}}(\text{minor}) = 34.77$  min,  $t_{\text{r}}(\text{major}) = 41.62$  min. See Section 4 for images depicting the HPLC traces.

**(*S,E*)-*N*-(3,4-dihydronaphthalen-1(2H)-ylidene)-2-methylpropane-2-sulfinamide ((*S*)-13k)<sup>[23]</sup>**

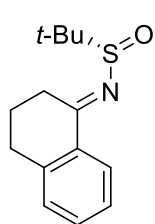

Synthesised from (*E*)-*S*-(*tert*-butyl)-*N*-(3,4-dihydronaphthalen-1(2H)-ylidene)thiohydroxylamine (47.0 mg, 0.200 mmol) using general procedure **2.4**.

Purified by flash column chromatography on silica gel (eluent: hexane : EtOAc = 10:1); colourless oil (21.0 mg, 42% yield);  $[\alpha]_{\text{D}}^{20} = 20.08$  ( $c = 1.00$ ,  $\text{CHCl}_3$ ),

Lit.  $[\alpha]_{\text{D}}^{20} = 27$  ( $c = 0.84$ ,  $\text{CH}_2\text{Cl}_2$ );  $^1\text{H}$  NMR (400 MHz, *Chloroform-d*)  $\delta$  8.17 (dd,  $J = 7.9, 1.4$  Hz, 1H), 7.38 (td,  $J = 7.9, 1.4$  Hz, 1H), 7.27 – 7.22 (m, 1H), 7.21 – 7.13 (m, 1H), 3.32 – 3.22 (m, 1H), 3.09 – 3.02 (m, 1H), 2.89 – 2.86 (m, 2H), 2.07 – 1.91 (m, 2H), 1.32 (s, 9H);  $^{13}\text{C}$  NMR (101 MHz, *Chloroform-d*)  $\delta$  177.1, 142.3, 133.2, 132.1, 129.0, 127.1, 126.6, 57.3, 32.5, 29.6, 22.8, 22.6; HPLC data: 97% *ee*, determined by HPLC (IC column, flow rate: 1.0 mL/min, hexane/propanol: 95:5):  $t_{\text{r}}(\text{minor}) = 35.41$  min,  $t_{\text{r}}(\text{major}) = 38.59$  min. See Section 4 for images depicting the HPLC traces.

**(*S,E*)-2-methyl-*N*-(pyridin-2-ylmethylene)propane-2-sulfinamide ((*S*)-13l)<sup>[24]</sup>**

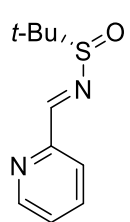

Synthesised from (*E*)-*S*-(*tert*-butyl)-*N*-(pyridin-2-ylmethylene)thiohydroxylamine (39.0 mg, 0.200 mmol) using general procedure **2.4**. Purified by flash column

chromatography on silica gel (eluent: DCM : MeOH = 50:1); black oil (34.0 mg, 81% yield);  $[\alpha]_{\text{D}}^{20} = 142.59$  ( $c = 1.0$ ,  $\text{CHCl}_3$ );  $^1\text{H}$  NMR (400 MHz, *Chloroform-d*)

$\delta$  8.74 (ddd,  $J = 4.8, 1.5, 0.8$  Hz, 1H), 8.69 (s, 1H), 8.01 (dt,  $J = 7.9, 1.5$  Hz, 1H), 7.81 (tdd,  $J = 7.9, 1.5, 0.8$  Hz, 1H), 7.40 (ddd,  $J = 7.9, 4.8, 1.5$  Hz, 1H), 1.28 (s, 9H);  $^{13}\text{C}$  NMR (101 MHz, *Chloroform-d*)  $\delta$  163.8, 152.5, 150.3, 136.9, 126.0, 123.2, 58.2, 22.8; HPLC data: 92% *ee*, determined by HPLC (IC column, flow rate: 1.0 mL/min, hexane/propanol: 95:5):  $t_{\text{r}}(\text{minor}) = 14.93$  min,  $t_{\text{r}}(\text{major}) = 11.54$  min. See Section 4 for images depicting the HPLC traces.

**(*S,E*)-2-methyl-*N*-(thiophen-2-ylmethylene)propane-2-sulfinamide (*S*)-13m** <sup>[24]</sup>

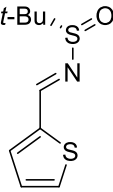 Synthesised from *S*-(*tert*-butyl)-*N*-(thiophen-2-ylmethylene)thiohydroxylamine (40.0 mg, 0.200 mmol) using general procedure 2.4. Purified by flash column chromatography on silica gel (eluent: hexane : EtOAc = 10:1); black solid (26.0 mg, 60% yield);  $[\alpha]_{\text{D}}^{20} = 5.06$  ( $c = 1.0$ ,  $\text{CHCl}_3$ );  $^1\text{H}$  NMR (400 MHz, *Chloroform-d*)  $\delta$  8.67 (d,  $J = 1.1$  Hz, 1H), 7.58 (dt,  $J = 5.0, 1.1$  Hz, 1H), 7.53 (dd,  $J = 3.7, 1.1$  Hz, 1H), 7.14 (dd,  $J = 5.0, 3.7$  Hz, 1H), 1.24 (s, 9H);  $^{13}\text{C}$  NMR (101 MHz, *Chloroform-d*)  $\delta$  155.5, 140.6, 133.9, 132.4, 128.2, 58.0, 22.6; HPLC data: 90% *ee*, determined by HPLC (IC column, flow rate: 1.0 mL/min, hexane/propanol: 95:5):  $t_{\text{r}}(\text{minor}) = 17.83$  min,  $t_{\text{r}}(\text{major}) = 16.53$  min. See Section 4 for images depicting the HPLC traces.

**(*S*)-*N*-((*E*)-((1*s*,3*R*)-adamantan-1-yl)methylene)-2-methylpropane-2-sulfinamide ((*S*)-13n)** <sup>[25]</sup>

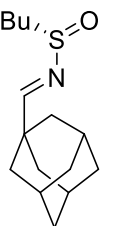 Synthesised from *N*-((*E*)-((3*r*,5*r*,7*r*)-adamantan-1-yl)methylene)-*S*-(*tert*-butyl)thiohydroxylamine (50.0 mg, 0.200 mmol) using general procedure 2.4. Purified by flash column chromatography on silica gel (eluent: hexane : EtOAc = 10:1); white solid (5.00 mg, 10% yield);  $[\alpha]_{\text{D}}^{20} = 112.74$  ( $c = 0.25$   $\text{CHCl}_3$ ), Lit.  $[\alpha]_{\text{D}}^{20} = -163.2$  ( $c = 0.5$ ,  $\text{CHCl}_3$ ) for *R* isomer;  $^1\text{H}$  NMR (400 MHz, *Chloroform-d*)  $\delta$  7.78 (s, 1H), 2.06 (s, 3H), 1.79 – 1.68 (m, 12H), 1.18 (s, 9H);  $^{13}\text{C}$  NMR (101 MHz, *Chloroform-d*)  $\delta$  175.2, 56.5, 40.2, 39.2, 36.7, 27.9, 22.4; HPLC data: 80% *ee*, determined by HPLC (IC column, flow rate: 1.0 mL/min, hexane/propanol: 95:5):  $t_{\text{r}}(\text{minor}) = 11.22$  min,  $t_{\text{r}}(\text{major}) = 10.53$  min. See Section 4 for images depicting the HPLC traces.

## Cinacalcet synthesis [26 – 29]

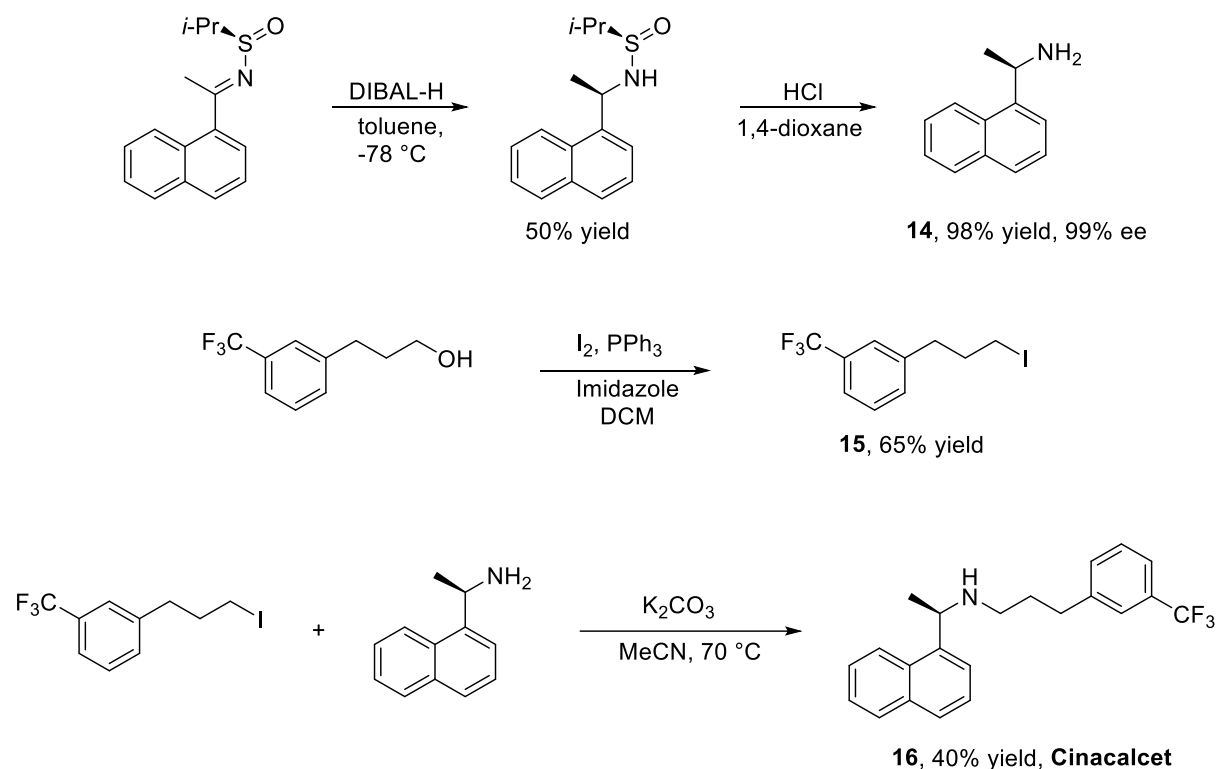

To a flame dried round bottom flask containing a magnetic stirring bar was added ((*R,E*)-*N*-(1-(naphthalen-1-yl)ethylidene)propane-2-sulfinamide (25.0 mg, 0.100 mmol, 1.0 equiv.) in dry toluene (1 mL). The solution was then cool down to  $-78\text{ }^{\circ}\text{C}$ , which was followed by the addition of 1.0 M DIBAL-H in toluene (0.200 mL, 0.200 mmol, 2.0 equiv.) dropwise and the remaining mixture was stirred at the same temperature for 1 h. Upon completion, the reaction mixture was quenched by adding sat. aq.  $\text{NH}_4\text{Cl}$  (5 mL) and then extracted with ethyl acetate ( $3 \times 5\text{ mL}$ ). The combined organic phases were then washed with brine (10 mL), dried over anhydrous  $\text{MgSO}_4$  and concentrated *in vacuo* to give the crude product mixture, which was purified by flash column chromatography on silica gel (eluent: hexane : EtOAc 10:4) to provide the (*R*)-*N*-((*R*)-1-(naphthalen-1-yl)ethyl)propane-2-sulfinamide (13.0 mg, 50% yield).

To a flame dried round bottom flask containing a magnetic stirring bar was added (*R*)-*N*-((*R*)-1-(naphthalen-1-yl)ethyl)propane-2-sulfinamide (13.0 mg, 0.050 mmol, 1.0 equiv.) in MeOH (50.0  $\mu\text{L}$ ). which was followed by the addition of 4.0 M HCl in 1,4-dioxane (25.0  $\mu\text{L}$ , 0.100

mmol, 2.0 equiv.) dropwise and the remain mixture was stirred at the room temperature for 30 min. Upon completion, the reaction was concentrated in *vacuo* and the remain residue was dissolved in water (10 mL) and the solution was washed with Et<sub>2</sub>O (10 mL). The aqueous phase was then adjusted to pH 11 by using sat aq. NaOH solution which was then extracted with ethyl acetate (3 × 5 mL) The combined organic phases were then washed with brine (10 mL), dried over anhydrous MgSO<sub>4</sub> and concentrated *in vacuo* to give the (*R*)-1-(naphthalen-1-yl)ethan-1-amine **14** (8.4 mg, 98% yield) which was pure enough for next step.

To a flame dried round bottom flask containing a magnetic stirring bar was added 3-(3-(trifluoromethyl)phenyl)propan-1-ol (204 mg, 1.00 mmol, 1.0 equiv.) in DCM (5.00 mL), which was followed by the addition of imidazole (8.20 mg, 0.100 mmol, 0.1 equiv.) and triphenylphosphine (289 mg, 1.10 mmol, 1.1 equiv.). at room temperature. The I<sub>2</sub> (254 mg, 1.00 mmol, 1.0 equiv.) was added portionwise and the mixture was then stirred at room temperature for 1 h. Upon finished, the reaction was quenched by sat Na<sub>2</sub>S<sub>2</sub>O<sub>3</sub> (10 mL) and extracted with DCM (3 × 10 mL). The combined organic phases were then washed with brine (10 mL), dried over anhydrous MgSO<sub>4</sub> and concentrated *in vacuo* to give the crude product mixture, which was purified by flash column chromatography on silica gel (eluent: hexane : EtOAc 20: 1) to provide 1-(3-iodopropyl)-3-(trifluoromethyl)benzene **15** (204 mg, 65% yield).

To a small vial containing a magnetic stirring bar was added (*R*)-1-(naphthalen-1-yl)ethan-1-amine (8.40 mg, 0.050 mmol, 1.0 equiv.), K<sub>2</sub>CO<sub>3</sub> (8.30 mg, 0.060 mmol, 1.2 equiv.) and 1-(3-iodopropyl)-3-(trifluoromethyl)benzene (20.0 mg, 0.060, 1.2 equiv.) in MeCN (2 mL). The vial was then sealed and the mixture was stirred at 70 °C overnight. Upon completion, the reaction was cool down to room temperature and concentrated *in vacuo* to give the crude product mixture, which was purified by flash column chromatography on silica gel (eluent: hexane : EtOAc 1:1) to provide Cinacalcet **16** as white solid (7.00 mg, 40% yield, 20% yield over three steps); [ $\alpha$ ]<sub>D</sub><sup>20</sup> = 13.85 (c = 0.7, CHCl<sub>3</sub>), Lit. [ $\alpha$ ]<sub>D</sub><sup>20</sup> = 20 (c = 1.03, CHCl<sub>3</sub>); <sup>1</sup>H NMR (400 MHz,

*Chloroform-d*)  $\delta$  8.23 – 8.11 (m, 1H), 7.88 (dd,  $J$  = 8.0, 1.6 Hz, 1H), 7.76 (dt,  $J$  = 8.0, 1.6 Hz, 1H), 7.66 (d,  $J$  = 7.1 Hz, 1H), 7.55 – 7.29 (m, 7H), 4.64 (q,  $J$  = 6.6 Hz, 1H), 2.77 – 2.54 (m, 4H), 1.85 (p,  $J$  = 7.4 Hz, 2H), 1.51 (d,  $J$  = 6.6 Hz, 3H);  $^{13}\text{C}$  NMR (101 MHz, *Chloroform-d*)  $\delta$  143.1, 134.1, 131.8, 131.4, 130.5, 129.1, 128.7, 127.3, 125.9, 125.8, 125.4, 125.1, 125.1, 123.0, 122.8, 122.7, 53.8, 47.3, 33.5, 31.9, 23.7 some peaks missing like  $\text{CF}_3$ ; the NMR spectra is matched with literature;  $^{19}\text{F}$  NMR (376 MHz, *Chloroform-d*)  $\delta$  -62.4.

### Large scale synthesis and further transformation <sup>[26,27, 30]</sup>

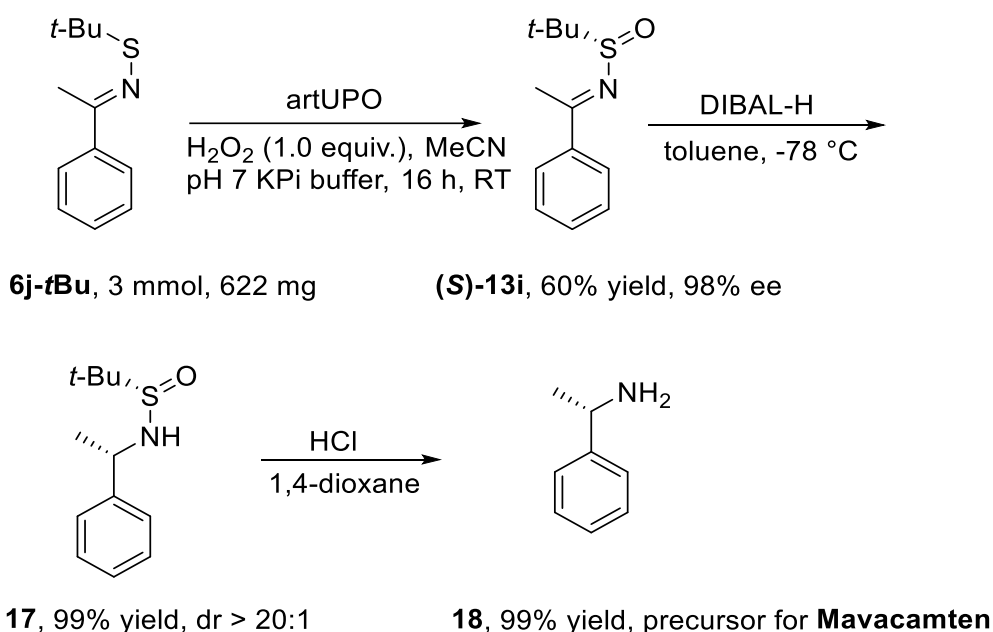

To a round bottom flask containing a magnetic stirring bar was added artUPO 15 mL (final concentration 0.25 g/mL) and KPi buffer (100 mM, pH = 7, 180 mL). The solution was diluted by the addition of deionised water (57 mL), followed by addition of the (*E*)-*S*-(*tert*-butyl)-*N*-(1-phenylethylidene)thiohydroxylamine (622 mg, 3.0 mmol, 1.0 equiv., final concentration 10 mM) in MeCN (72 mL). Next, 36 mL of an 83 mM  $\text{H}_2\text{O}_2$  solution (prepared from 400  $\mu\text{L}$  30%  $\text{H}_2\text{O}_2$  in 36 mL deionised water) was added over a 10 h period, using a syringe pump. After the  $\text{H}_2\text{O}_2$  addition was complete, the reaction was then stirred at room temperature for a further 6 h. The reaction mixture was then extracted with ethyl acetate ( $3 \times 50$  mL). The combined organic phases were then washed with brine (50 mL), dried over anhydrous  $\text{MgSO}_4$  and

concentrated *in vacuo* to give the crude product mixture, which was purified by flash column chromatography on silica gel (eluent: hexane : EtOAc 10:1) to provide the (*S,E*)-2-methyl-*N*-(1-phenylethylidene)propane-2-sulfonamide (**S**)-**13j** (400 mg, 60% yield).

To a flame dried round bottom flask containing a magnetic stirring bar was added (*S,E*)-2-methyl-*N*-(1-phenylethylidene)propane-2-sulfonamide (270 mg, 1 mmol, 1.0 equiv.) in dry toluene (10 mL). The solution was then cool down to  $-78\text{ }^{\circ}\text{C}$ , which was followed by the addition of 1.0 M DIBAL-H in toluene (2 mL, 2 mmol, 2.0 equiv.) dropwise and the remain mixture was stirred at the same temperature for 1 h. Upon completion, the reaction mixture was quenched by adding sat  $\text{NH}_4\text{Cl}$  (20 mL) and then extracted with ethyl acetate ( $3 \times 20\text{ mL}$ ). The combined organic phases were then washed with brine (10 mL), dried over anhydrous  $\text{MgSO}_4$  and concentrated *in vacuo* to give the crude product mixture, which was purified by flash column chromatography on silica gel (eluent: hexane : EtOAc 10: 4) to provide the (*S*)-2-methyl-*N*-((*S*)-1-phenylethyl)propane-2-sulfonamide **17** (225 mg, 99% yield).

To a flame dried round bottom flask containing a magnetic stirring bar was added (*S*)-2-methyl-*N*-((*S*)-1-phenylethyl)propane-2-sulfonamide (225 mg, 1.0 mmol, 1.0 equiv.) in MeOH (10 mL). which was followed by the addition of 4.0 M HCl in 1,4-dioxane (0.5 mL, 2 mmol, 2.0 equiv.) dropwise and the remain mixture was stirred at the room temperature for 30 min. Upon completion, the reaction was concentrated *in vacuo* and the remain residue was dissolved in water (20 mL) and the solution was washed with EtO<sub>2</sub> (20 mL). The aqueous phase was then adjusted to pH 11 by using sat aq. NaOH solution which was then extracted with ethyl acetate ( $3 \times 20\text{ mL}$ ) The combined organic phases were then washed with brine (10 mL), dried over anhydrous  $\text{MgSO}_4$  and concentrated *in vacuo* to give (*S*)-1-phenylethan-1-amine **18** (107 mg, 99% yield) without any purification as light yellow oil (107 mg, 59% yield over three steps);  $[\alpha]_{\text{D}}^{20} = -26.53$  ( $c = 1.0$ ,  $\text{CHCl}_3$ ), Lit.  $[\alpha]_{\text{D}}^{20} = -30.6$  ( $c = 1.0$ ,  $\text{CHCl}_3$ );  $^1\text{H}$  NMR (400 MHz, *Chloroform-d*)  $\delta$  7.35 – 7.28 (m, 4H), 7.25 – 7.19 (m, 1H), 4.09 (q,  $J = 7.0\text{ Hz}$ , 1H), 1.48 (s,

2H), 1.37 (d,  $J = 6.6$  Hz, 3H);  $^{13}\text{C}$  NMR (101 MHz, *Chloroform-d*)  $\delta$  147.9, 128.6, 126.9, 125.8, 51.4, 25.8.

HPLC Data: >99 % *ee* determined by HPLC (IBN5, flow rate: 1.0 mL/ min, hexane/ isopropanol = 95:5)  $t_r$  (minor) = 12.51 min,  $t_r$  (major) = 10.99 min. See Section 4.0 for images depicting the HPLC trace.

#### **4) Enzyme production**

Production of rAaeUPO-PaDa-I-H and artUPO used in this manuscript: The cloning and expression of rAaeUPO-PaDa-I-H and artUPO and their preparation from fermentations of *Pichia pastoris* was done described previously.<sup>[31,32]</sup>



## 5) HPLC Data

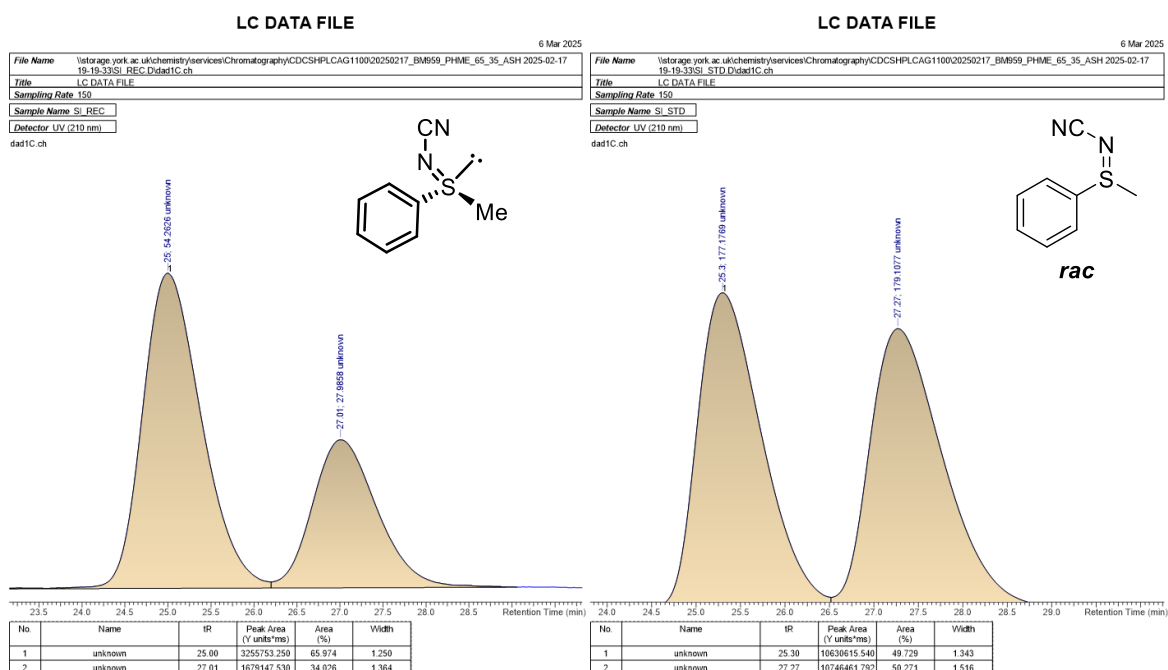

Figure S1. HPLC trace for **(S)-4a**

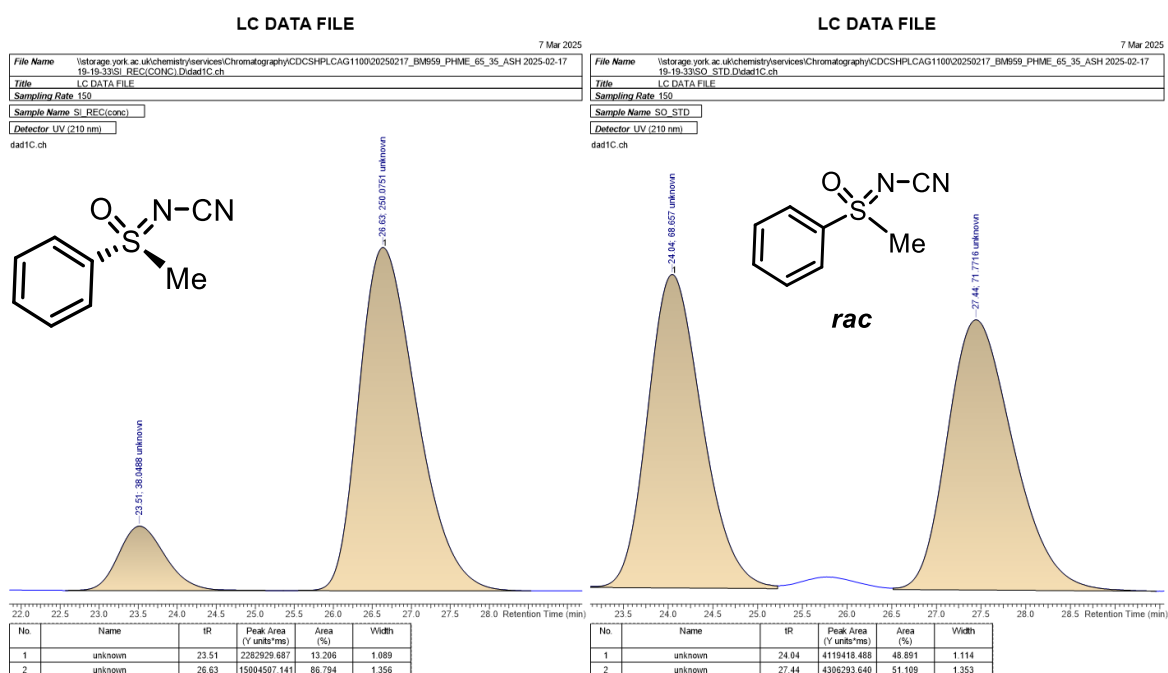

Figure S2. HPLC trace for **(S)-5a**

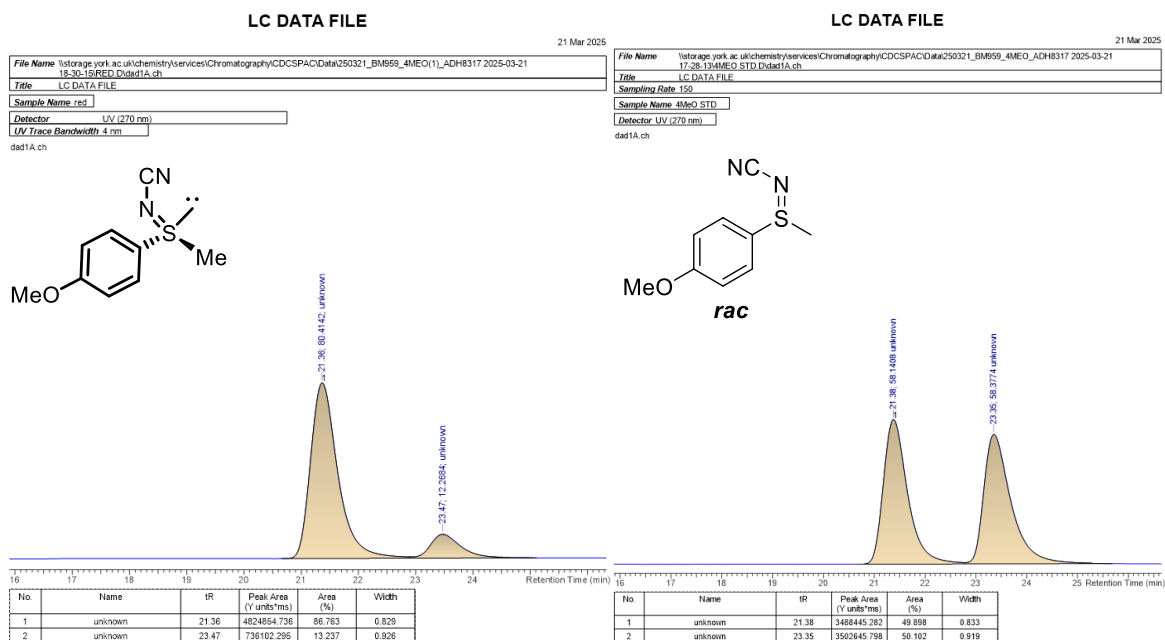

Figure S3. HPLC Data for (S)-4b

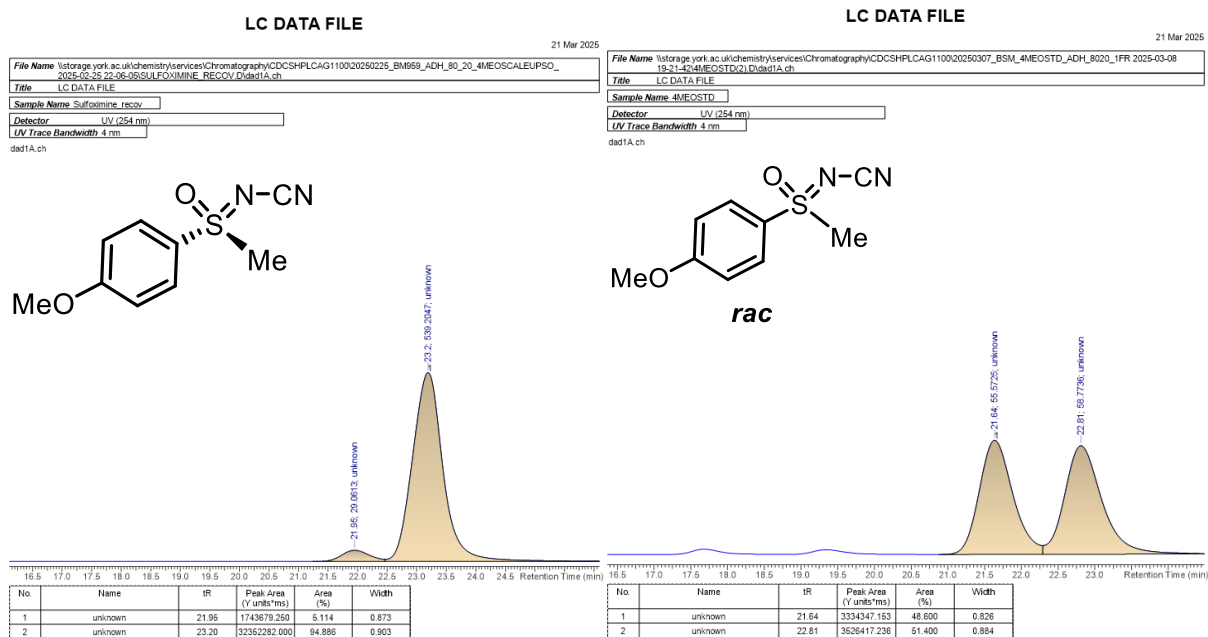

Figure S4. HPLC Data for (S)-5b

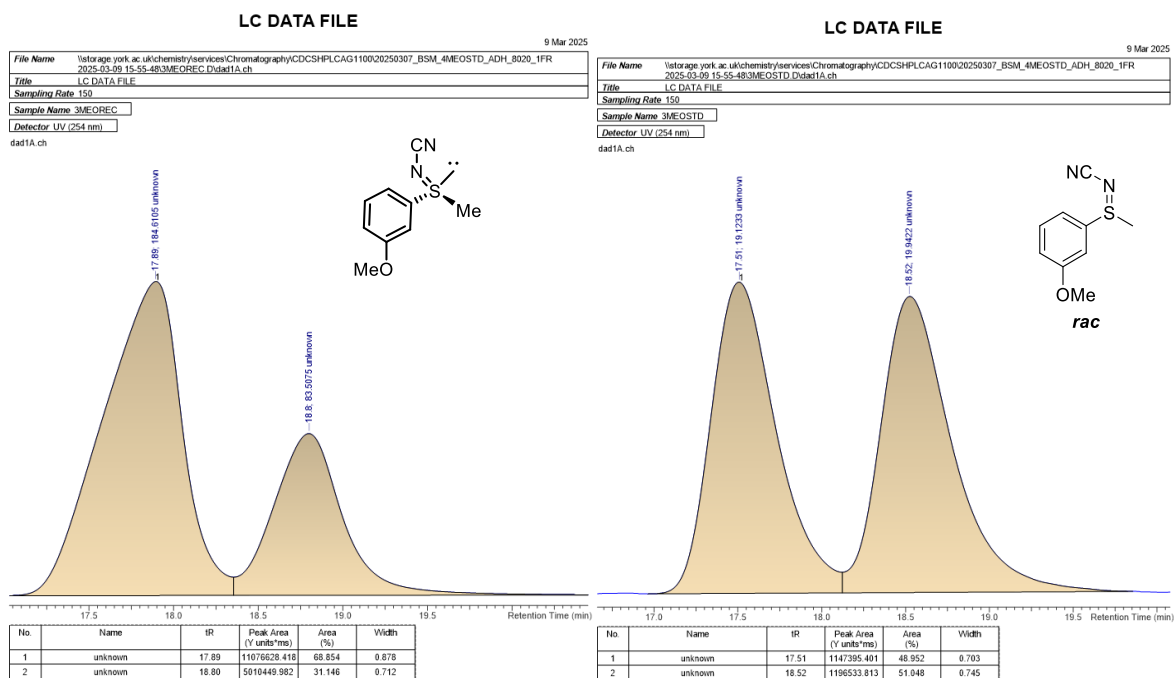

Figure S5. HPLC Data for (S)-4c

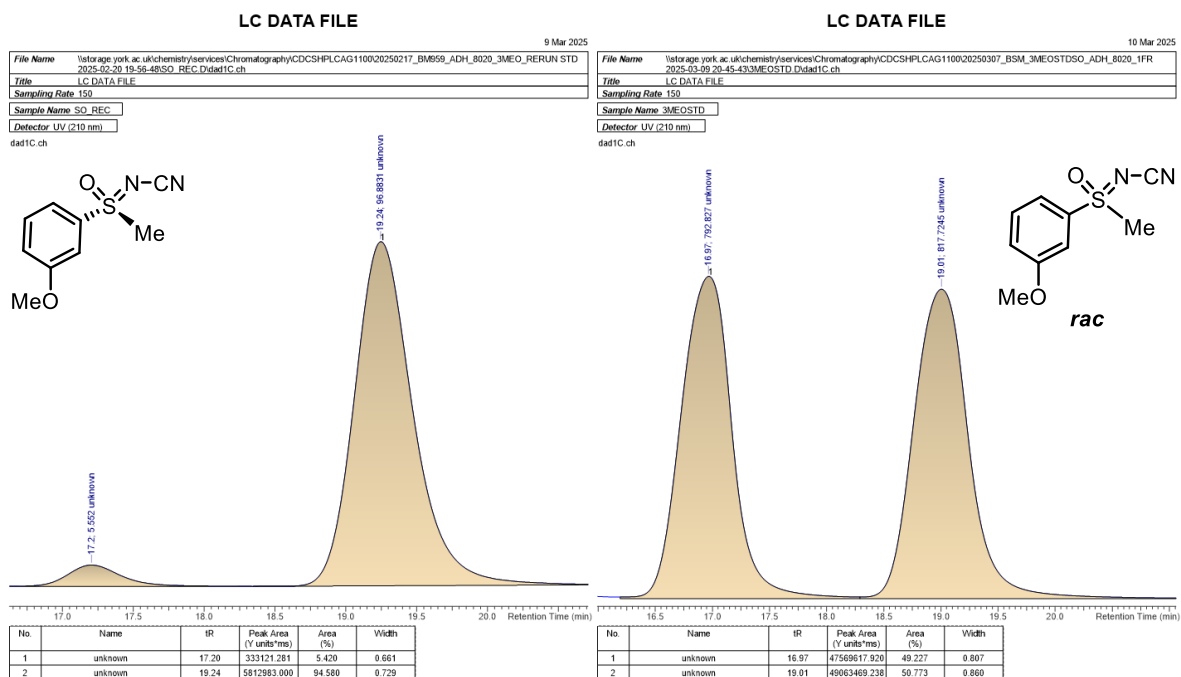

Figure S6. HPLC Data for (S)-5c

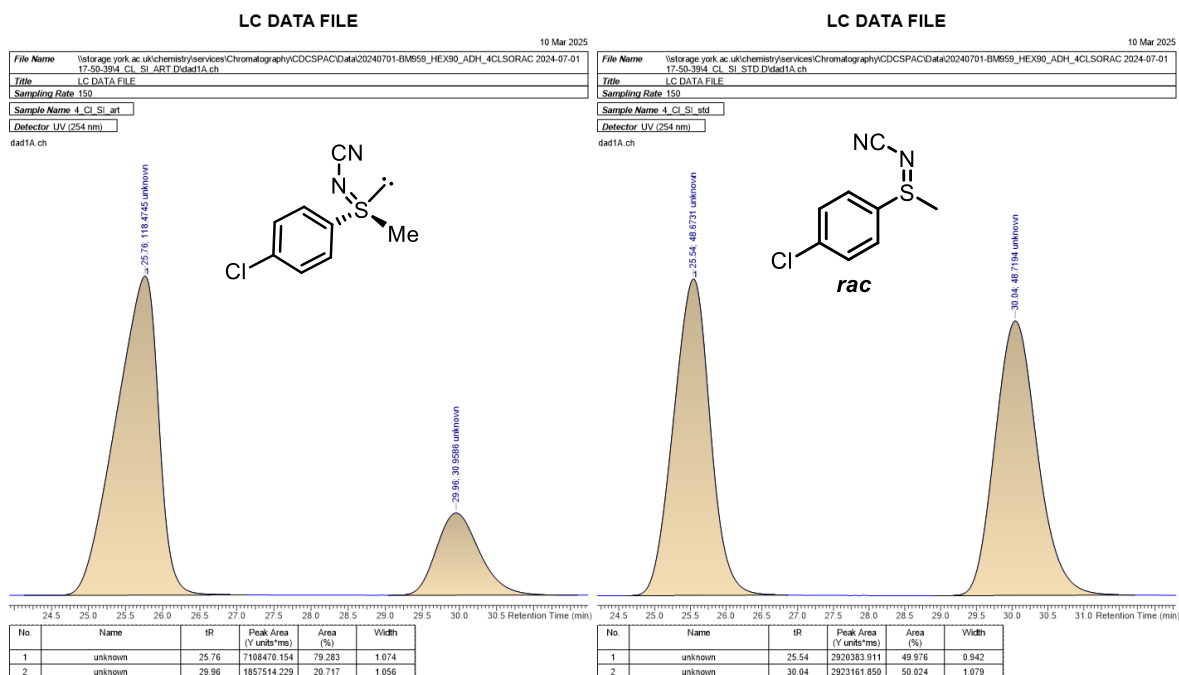

Figure S7. HPLC Data for (*S*)-4d

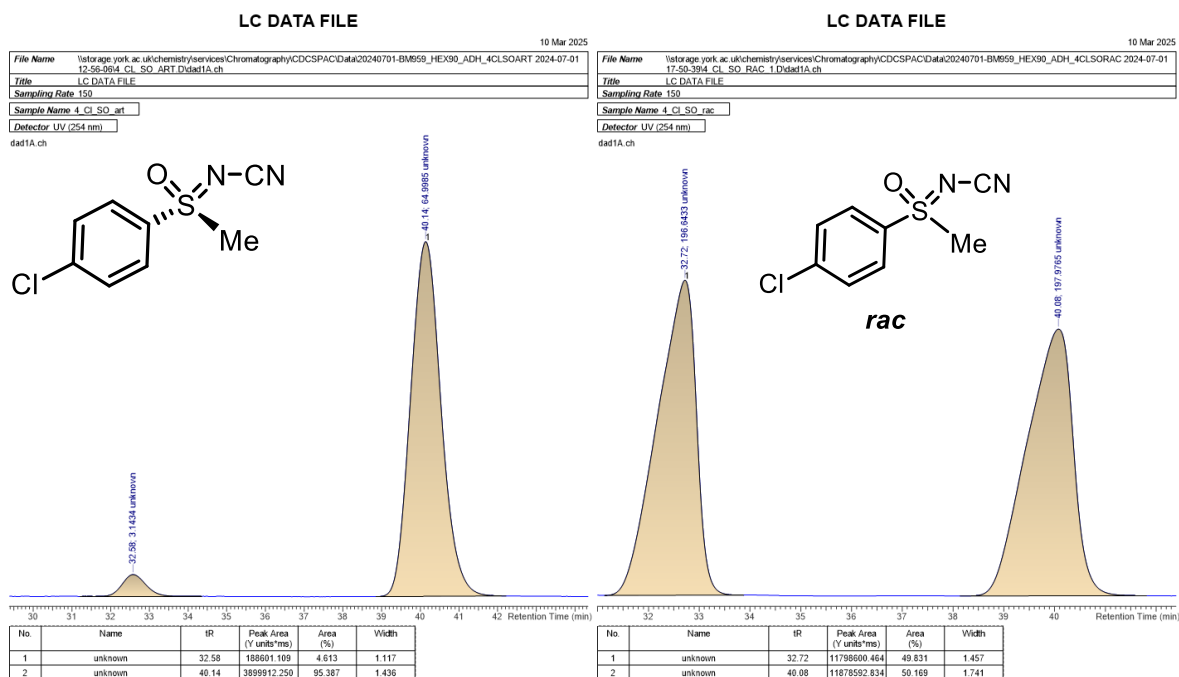

Figure S8. HPLC Data for (*S*)-5d

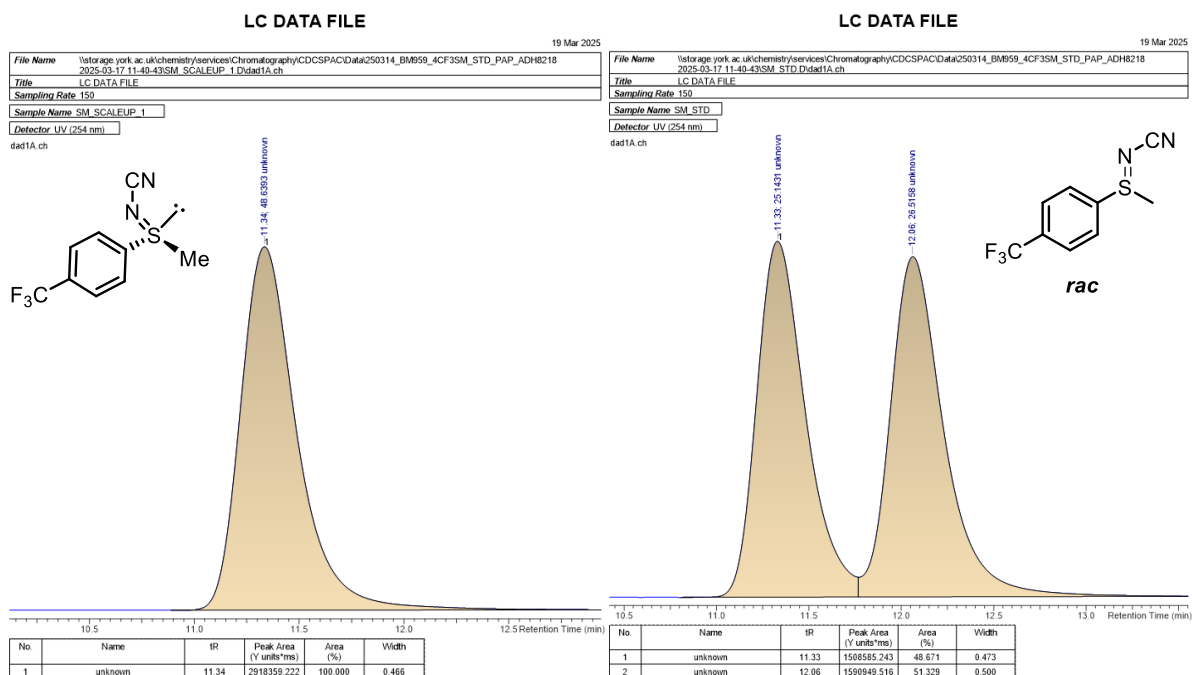

Figure S9. HPLC Data for (*S*)-4e

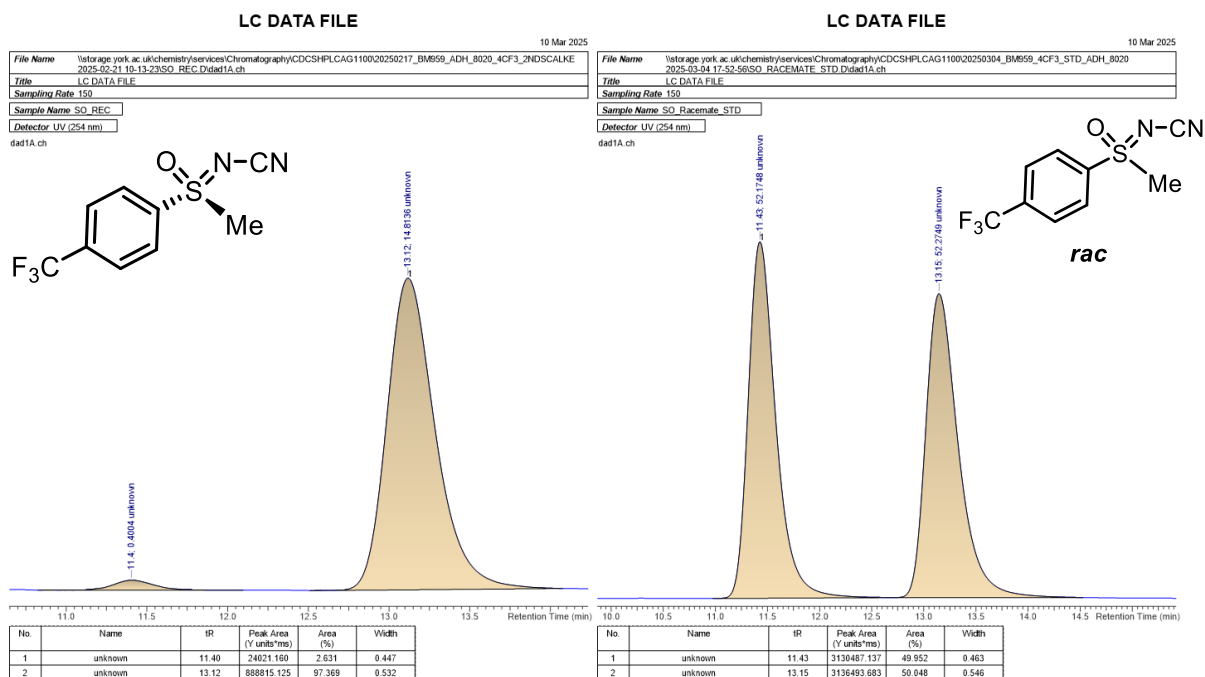

Figure S10. HPLC Data for (*S*)-5e

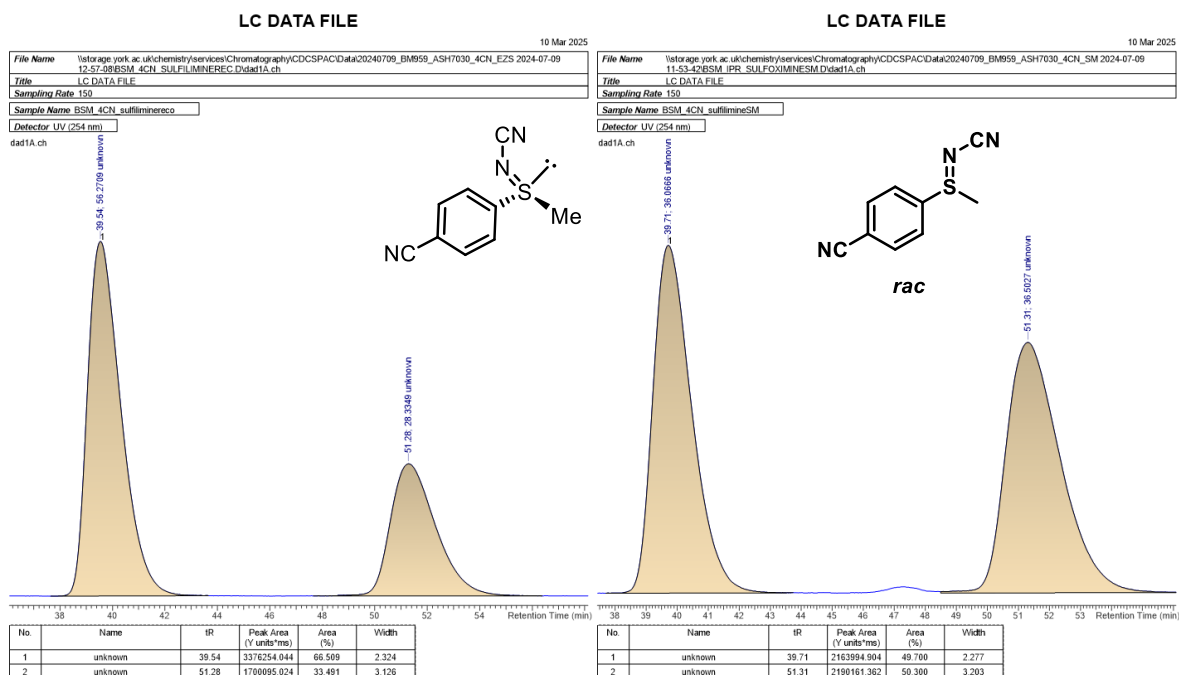

Figure 12. HPLC Data for **(S)-4f**

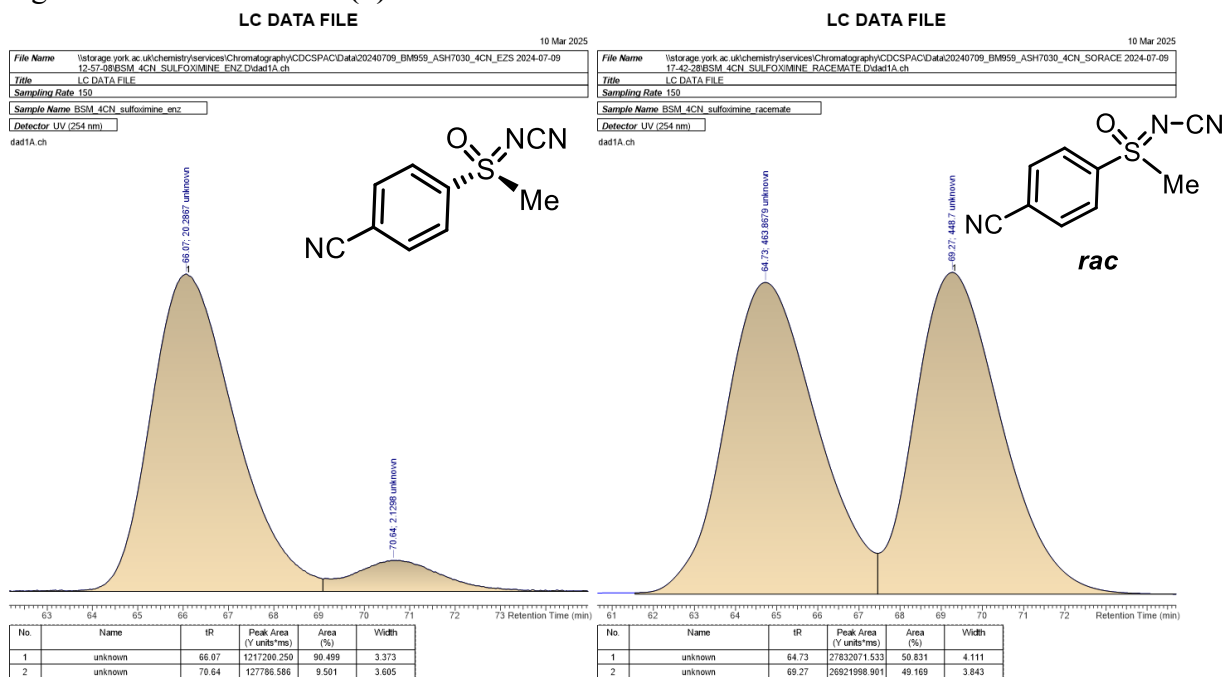

Figure S13. HPLC Data for **(S)-5f**

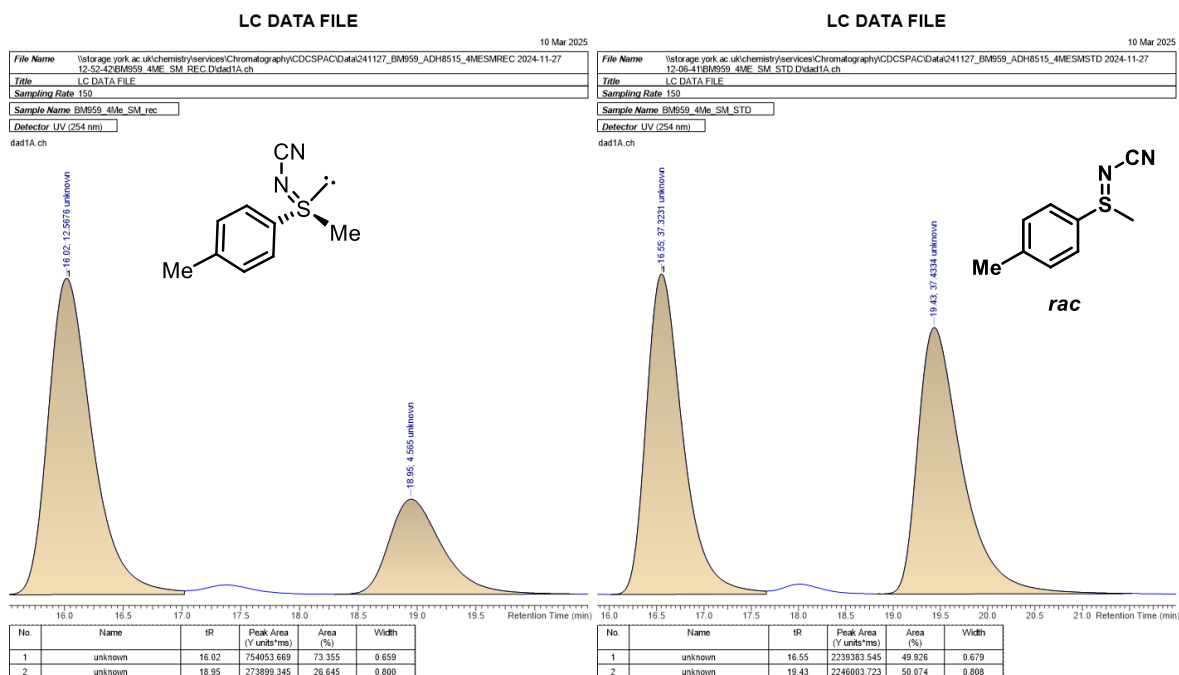

Figure S14. HPLC Data for **(S)-4g**

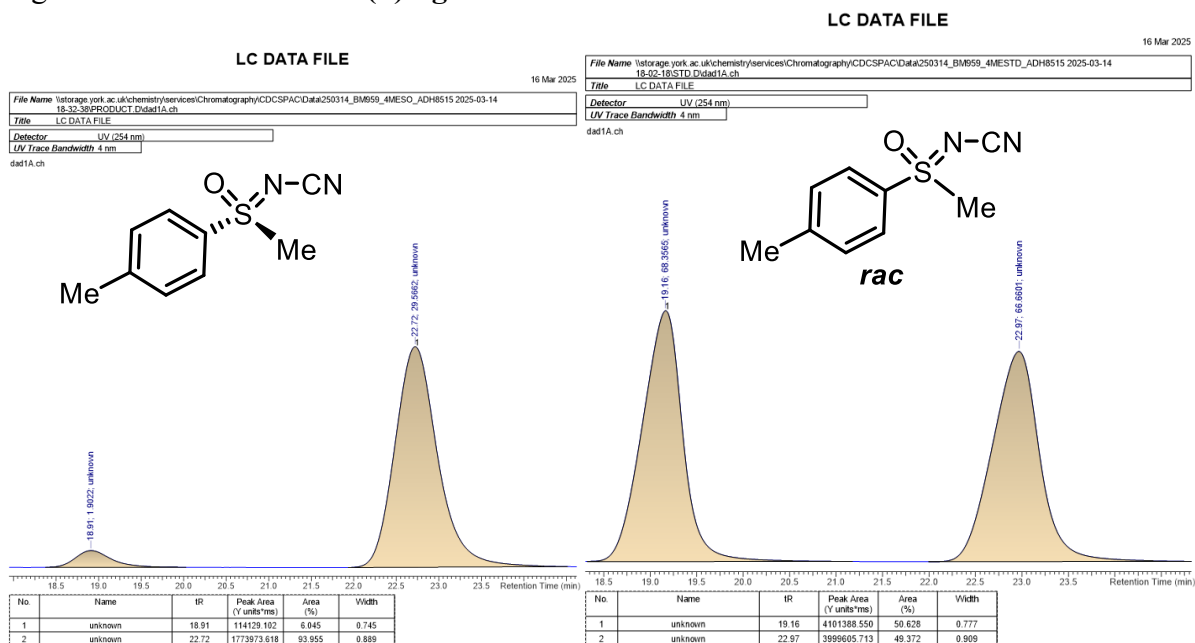

Figure S15. HPLC Data for **(S)-5g**

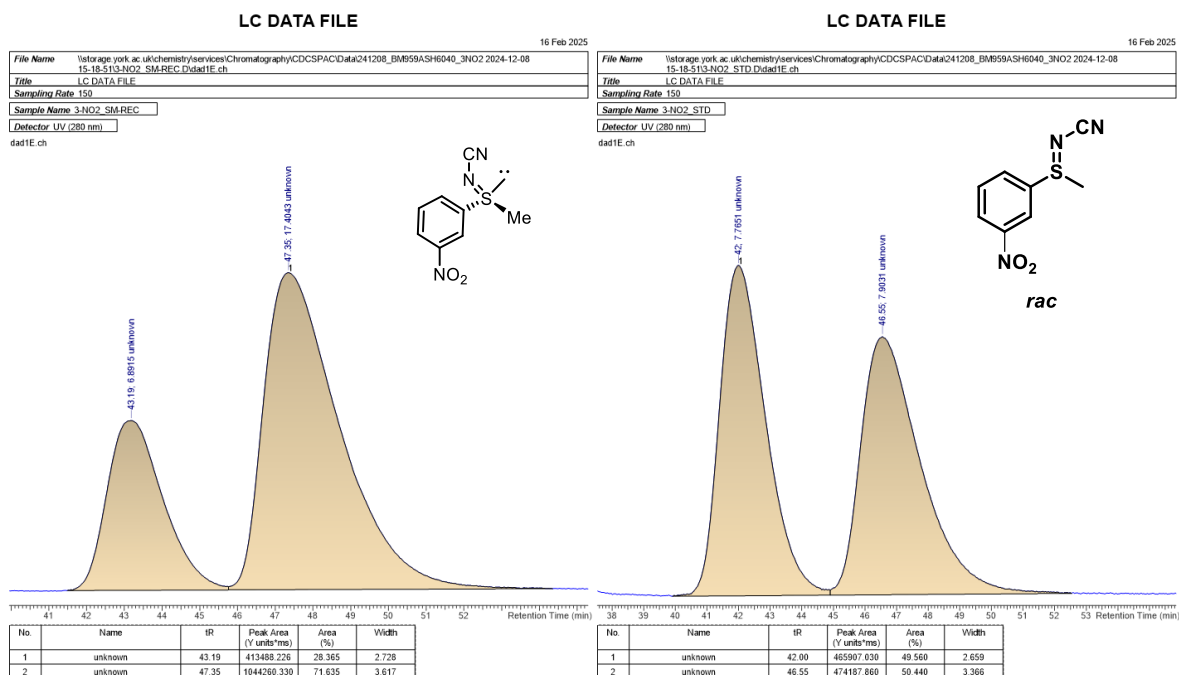

Figure S16. HPLC Data for **(S)-4h**

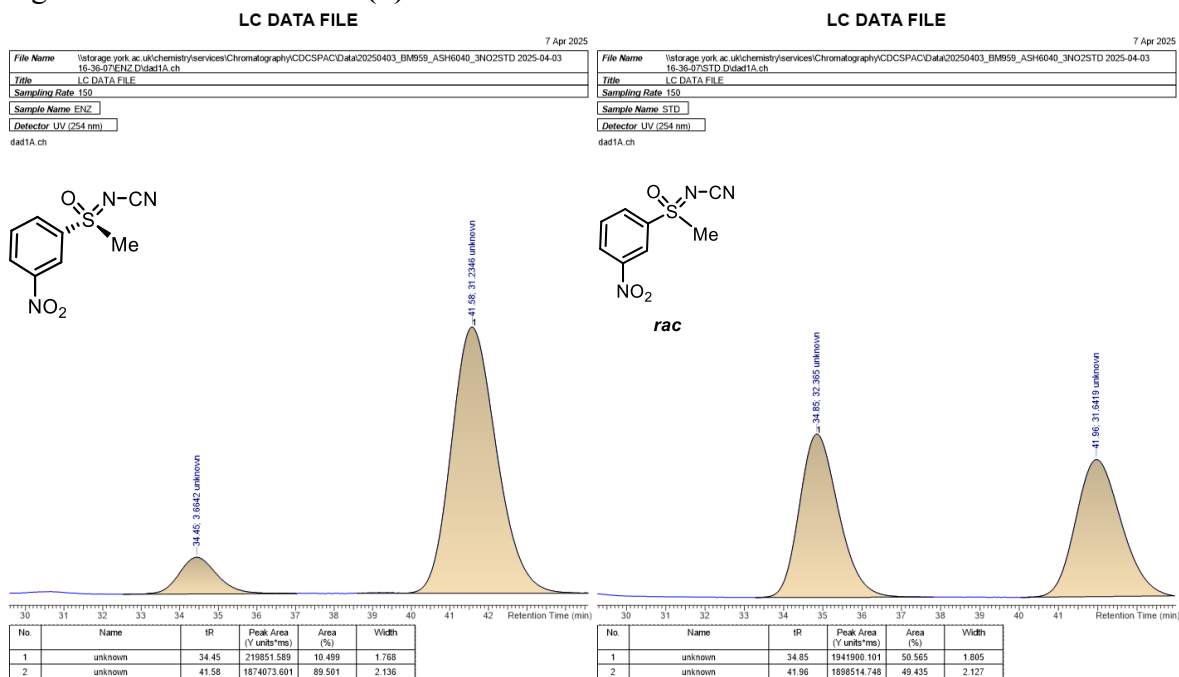

Figure S17. HPLC Data for **(S)-5h**



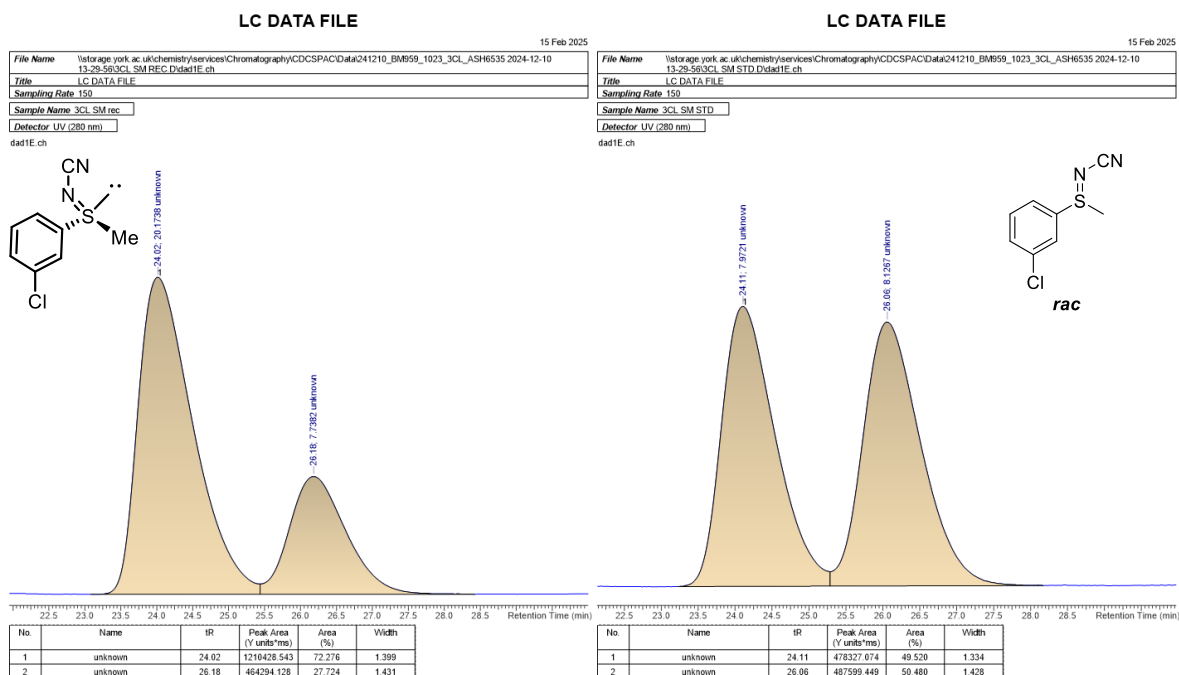

Figure S18. HPLC Data for **(S)-4i**

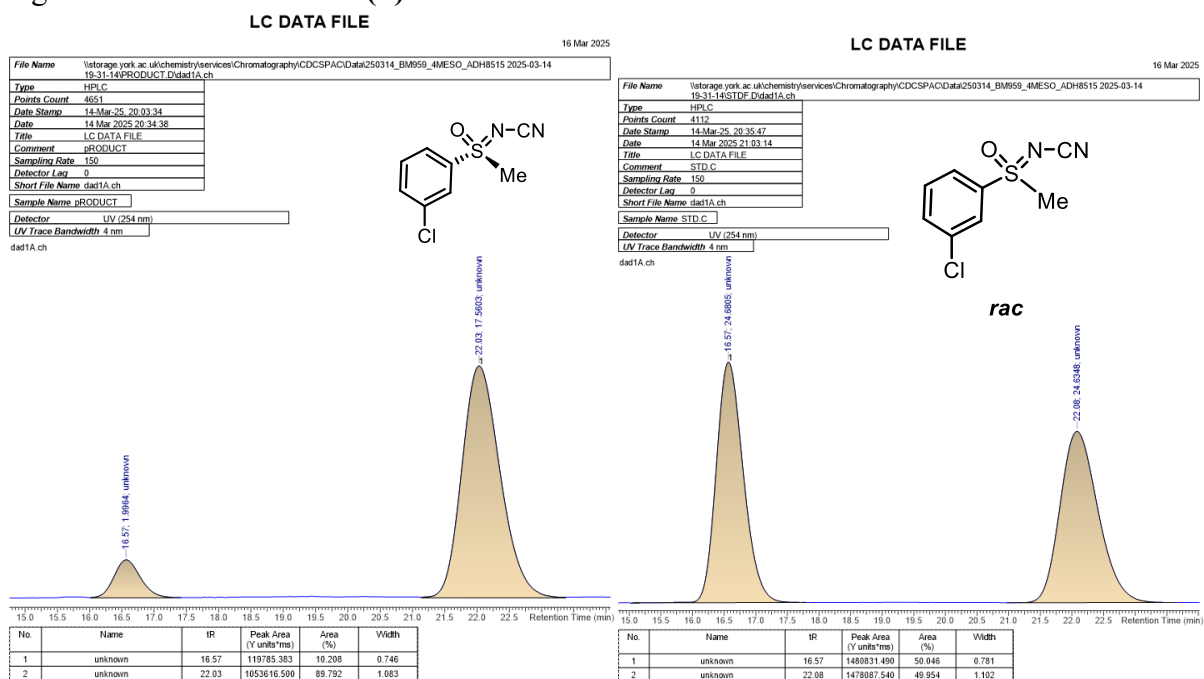

Figure S19. Data for **(S)-5i**

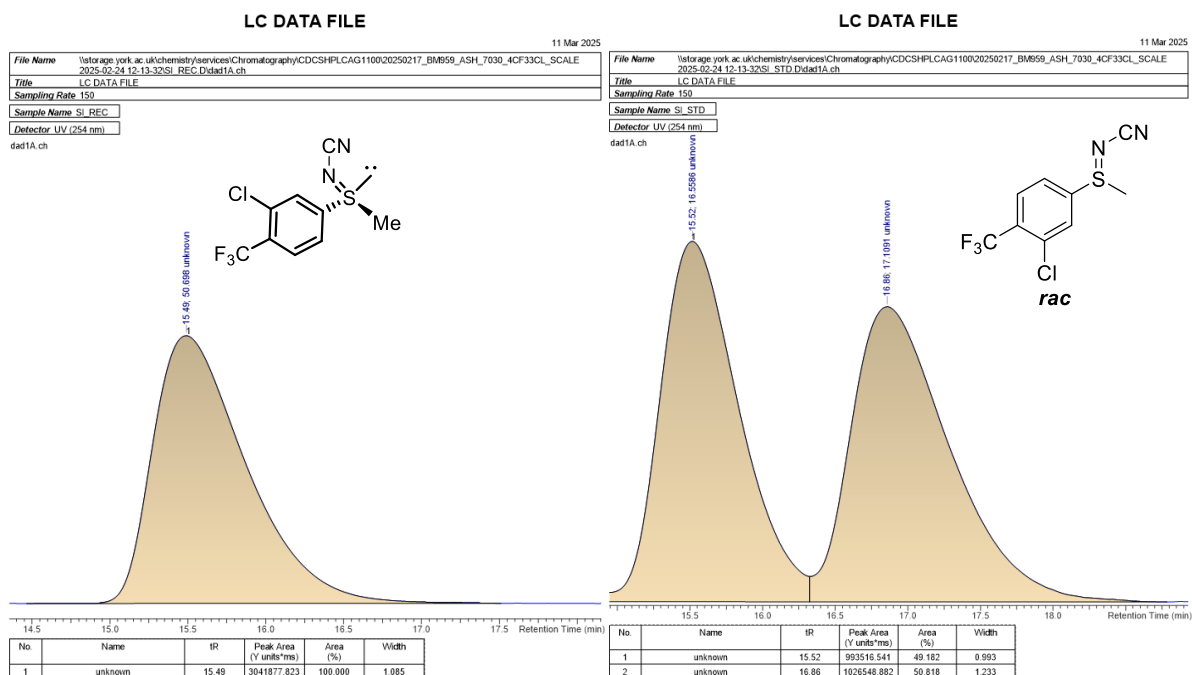

Figure S20. HPLC Data for **(S)-4j**

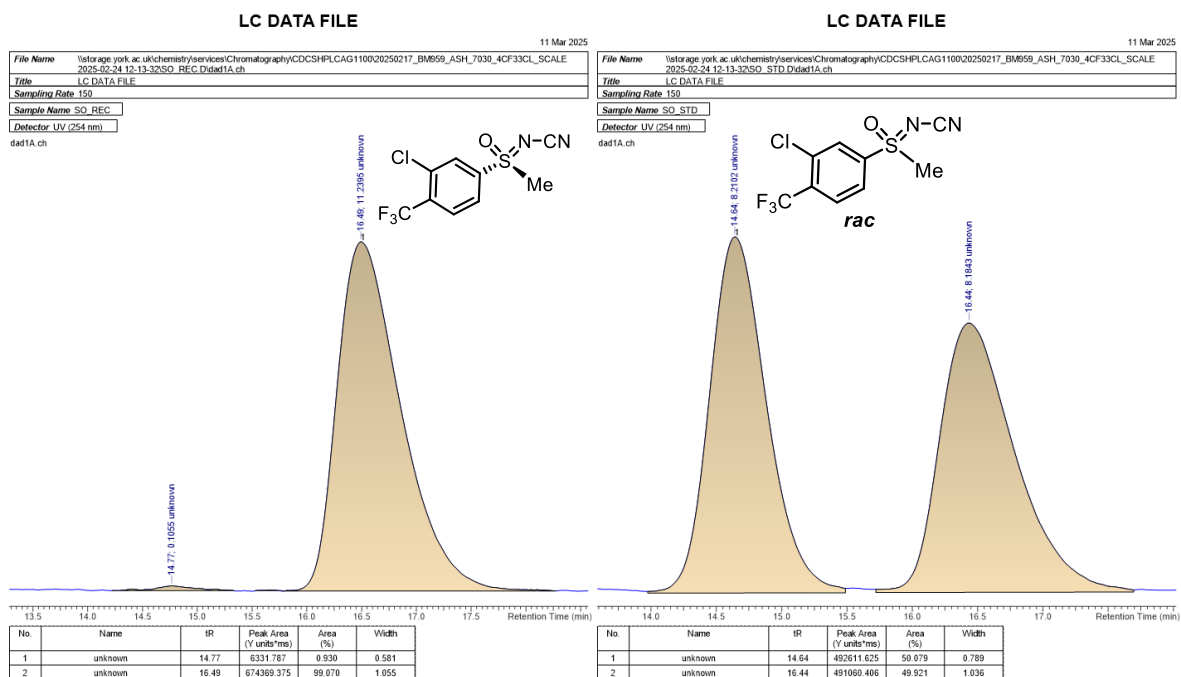

Figure S21. HPLC Data for **(S)-5j**

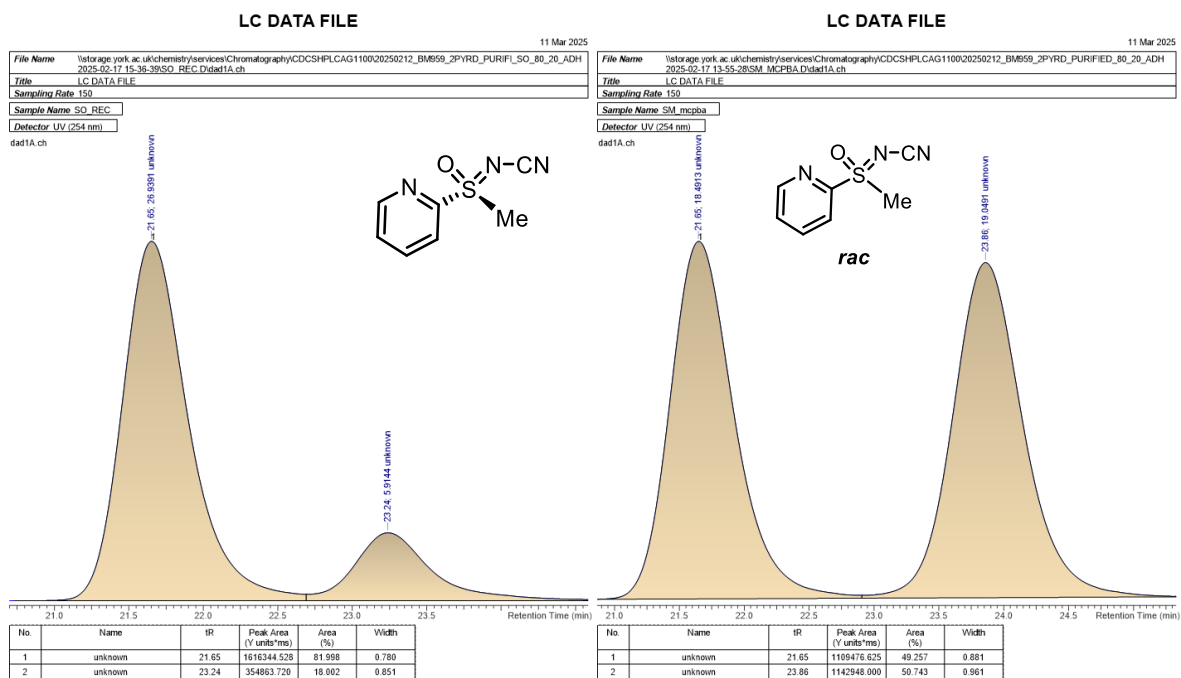

Figure S22. HPLC Data for **(S)-5k**

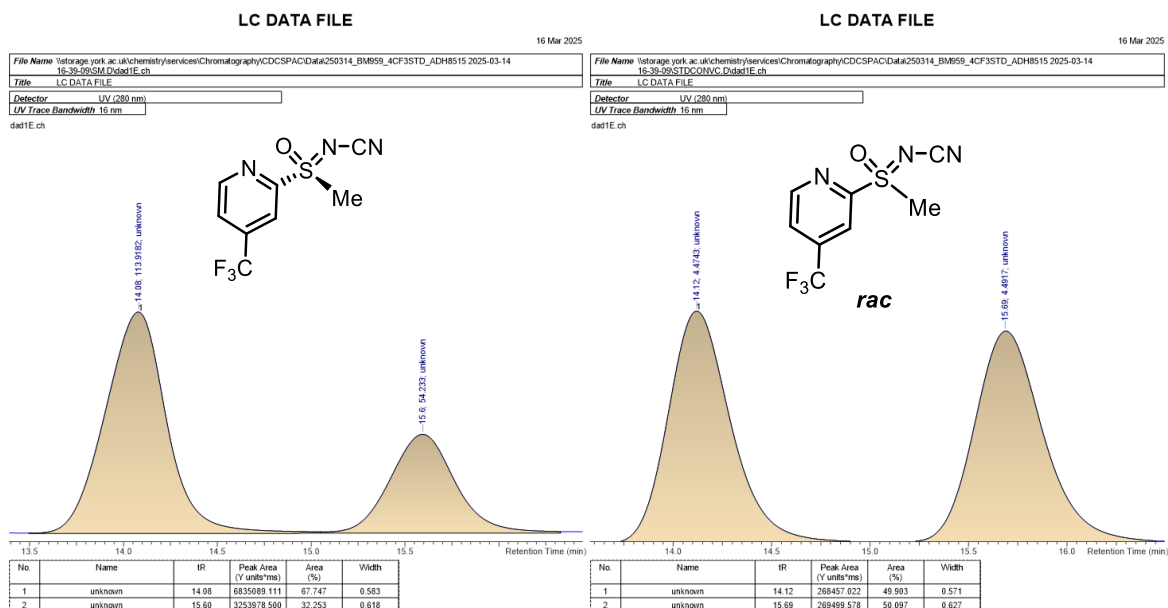

Figure S23. HPLC Data for **(S)-4I**

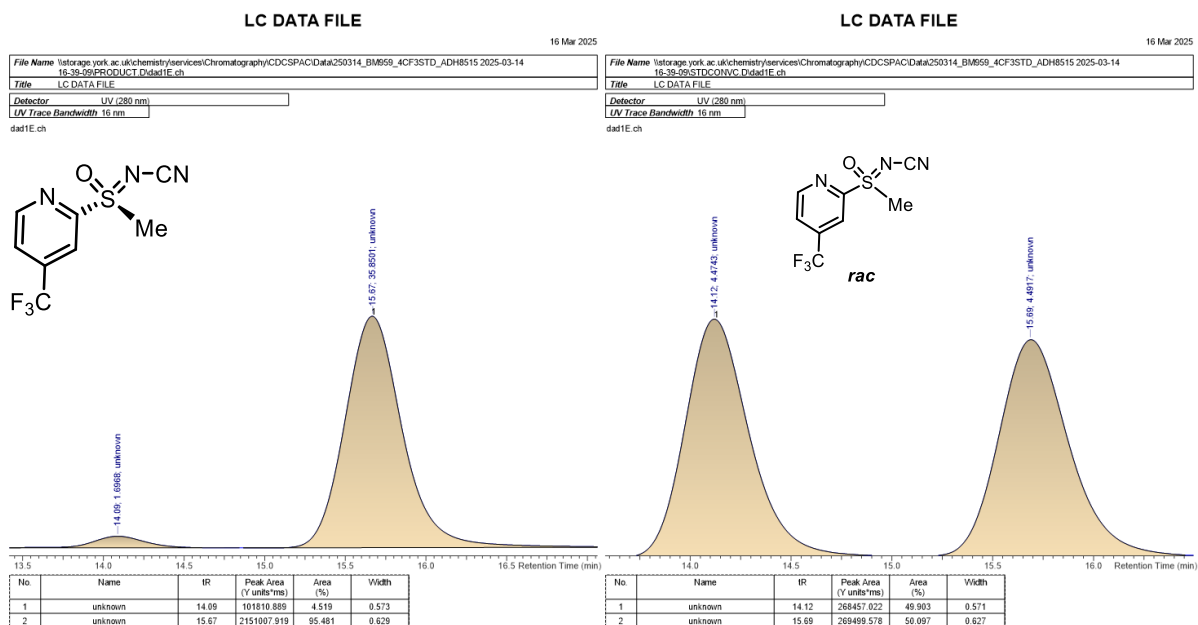

Figure S24. HPLC Data for **(S)-5I**

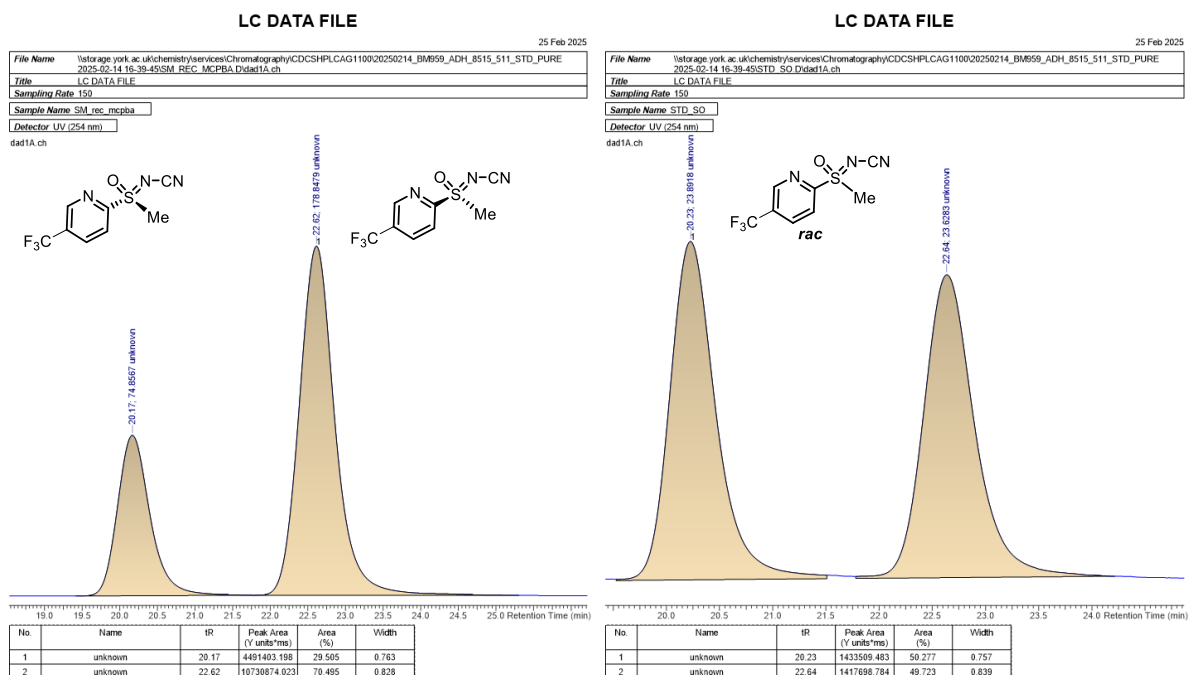

Figure S25. HPLC Data for **(S)-4m** following m-CPBA Oxidation

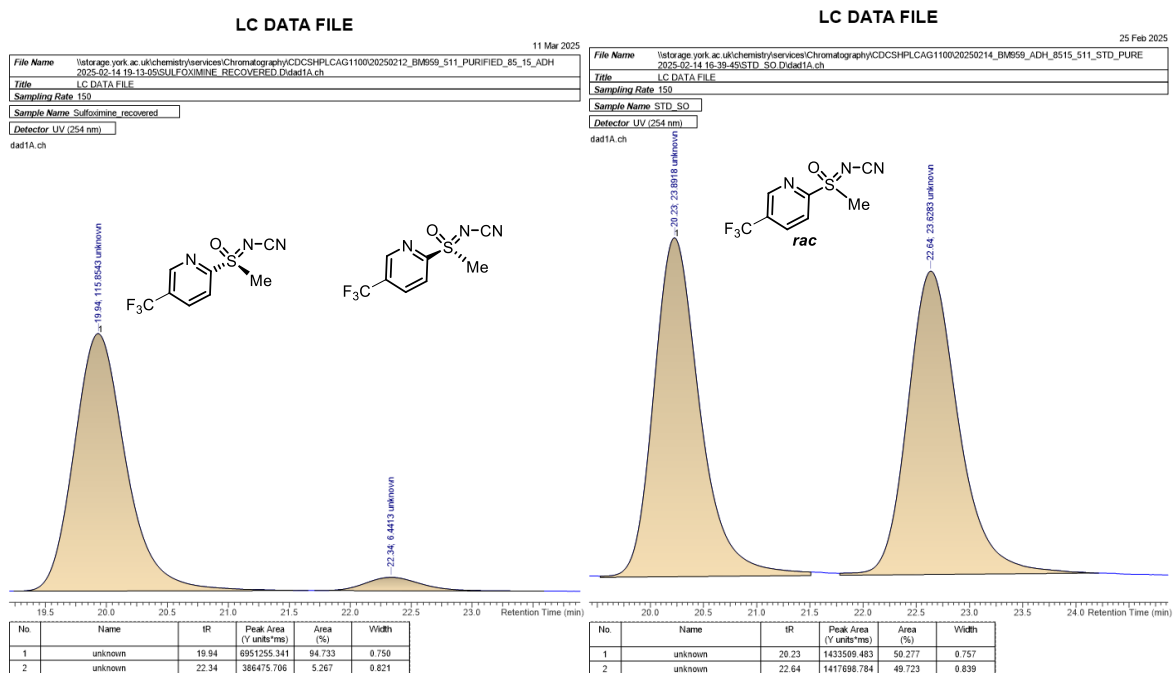

Figure S26. HPLC Data for **(S)-5m**

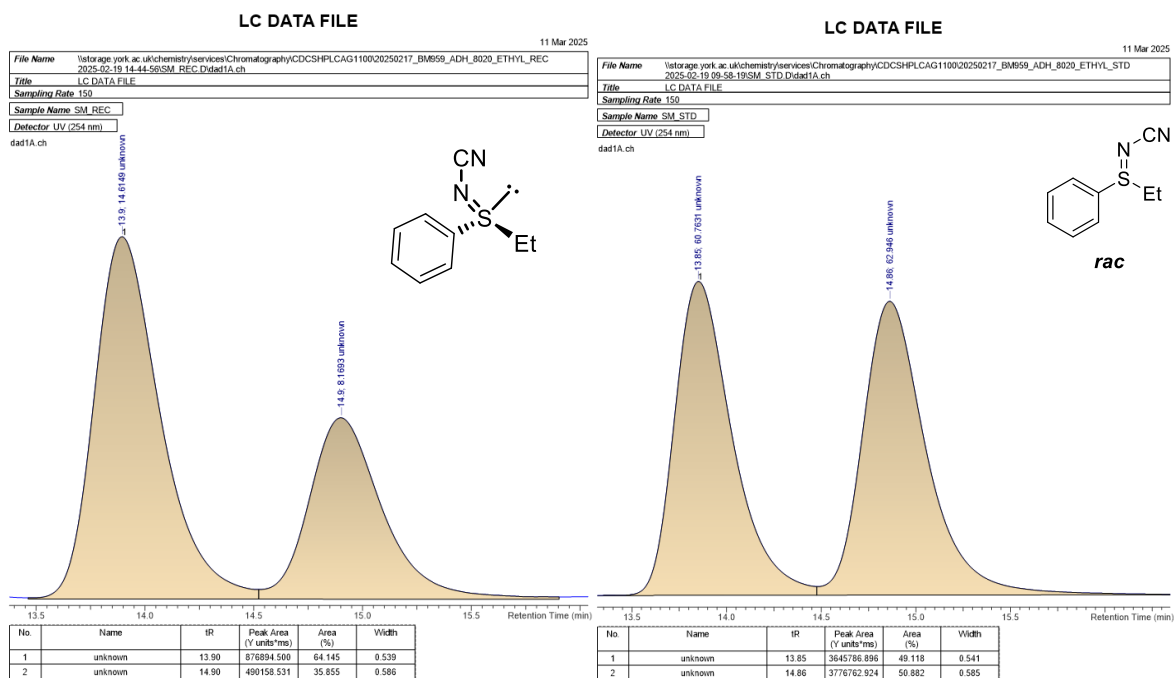

Figure S27. HPLC Data for **(S)-4n**

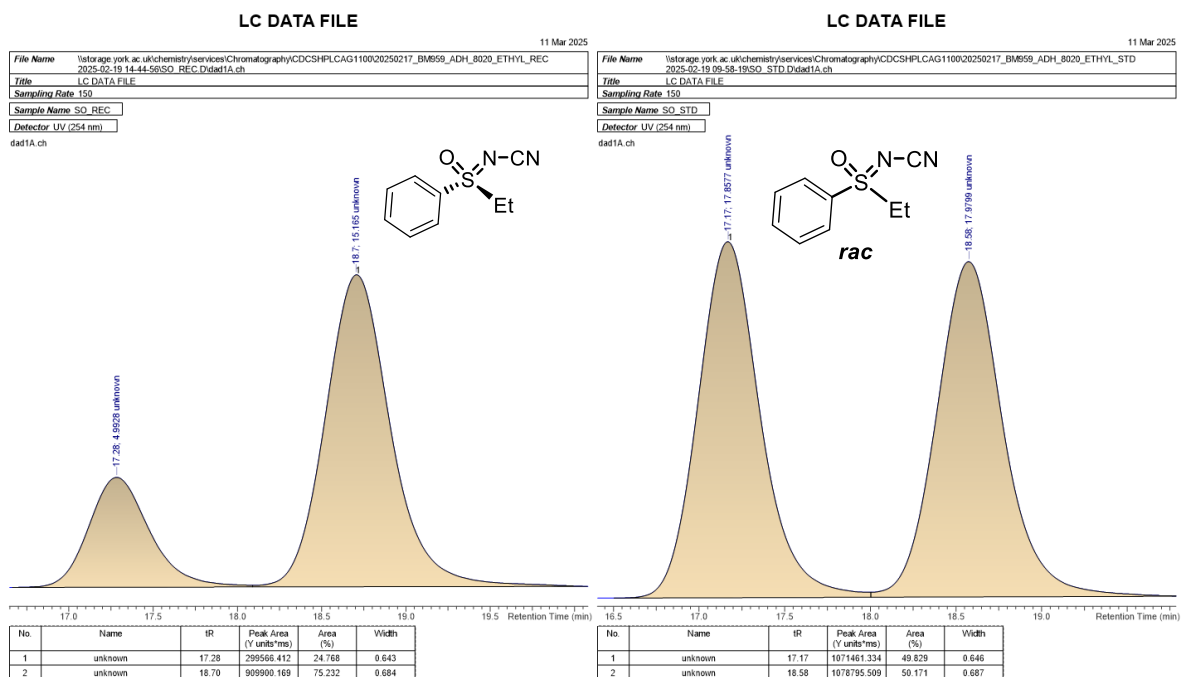

Figure S28. HPLC Data for **(S)-5n**

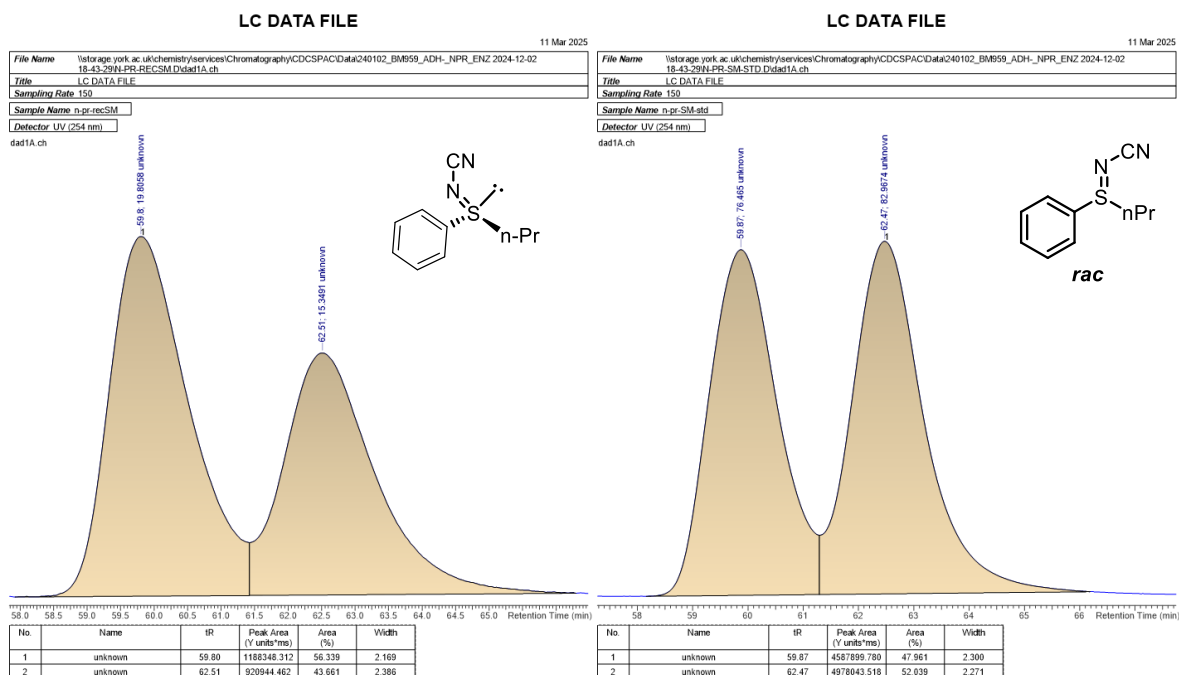

Figure S29. HPLC Data for (*S*)-4o

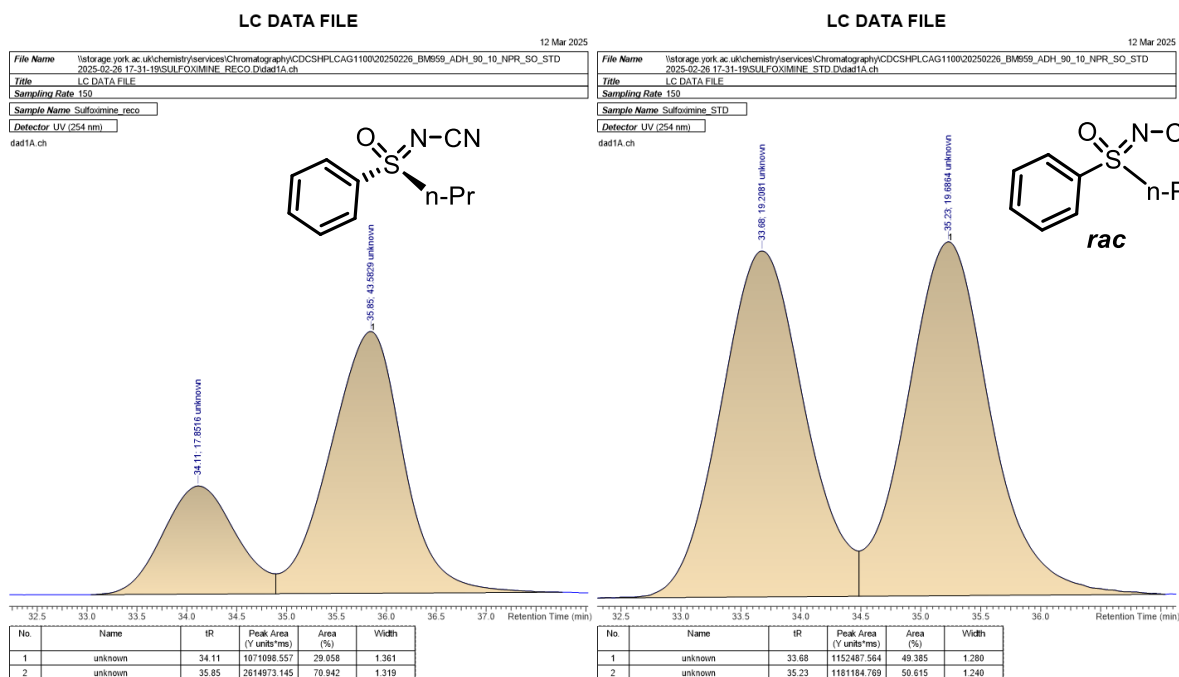

Figure S30. HPLC Data for (*S*)-5o

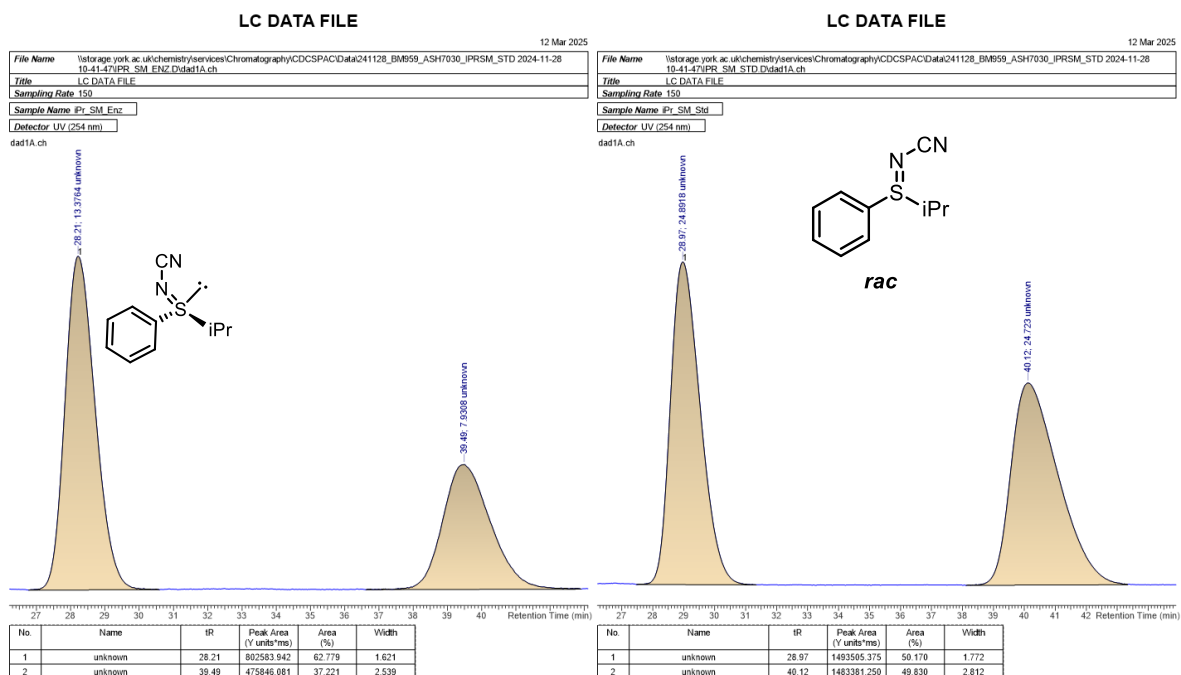

Figure S31. HPLC Data for **(S)-4p**

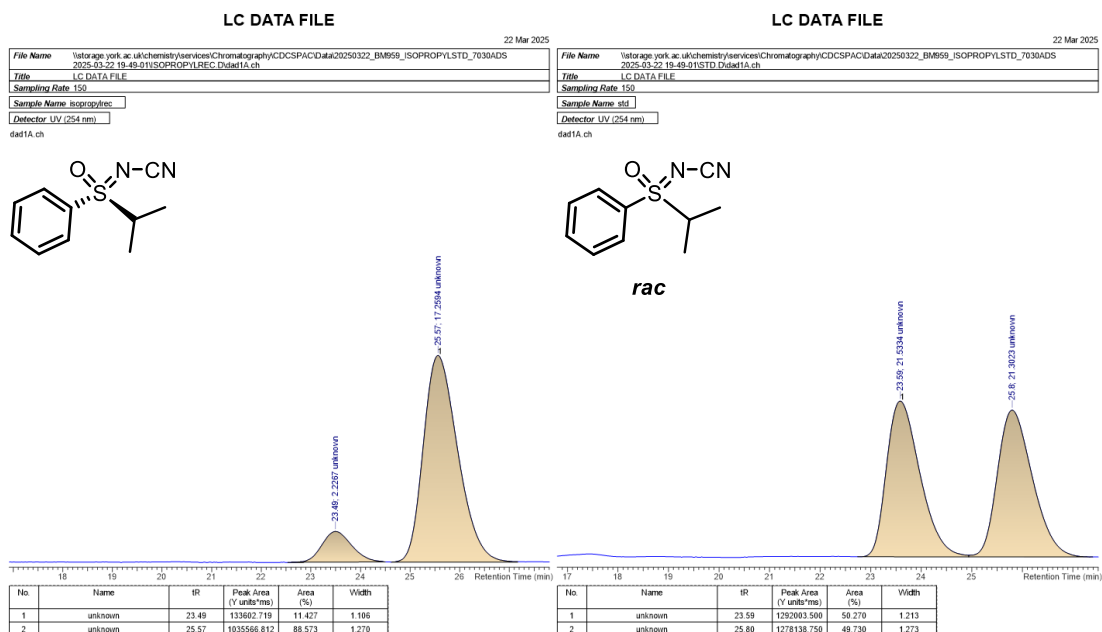

Figure S32. HPLC Data for **(S)-5p**



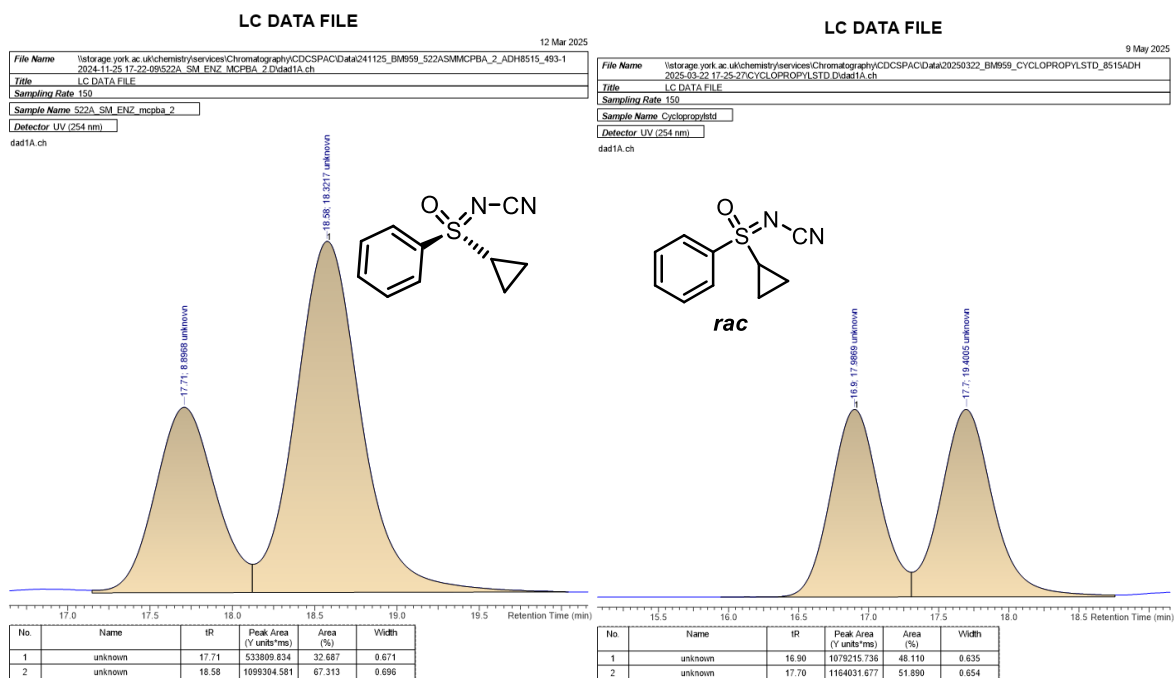

Figure S33. HPLC Data for (S)-4q

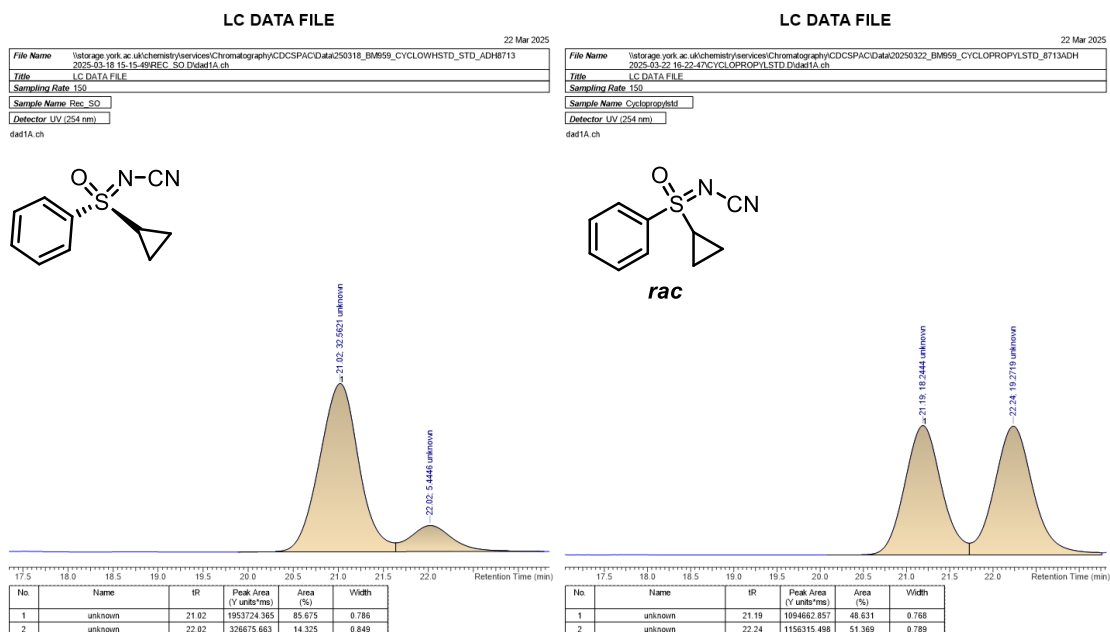

Figure S34. HPLC Data for (S)-5q

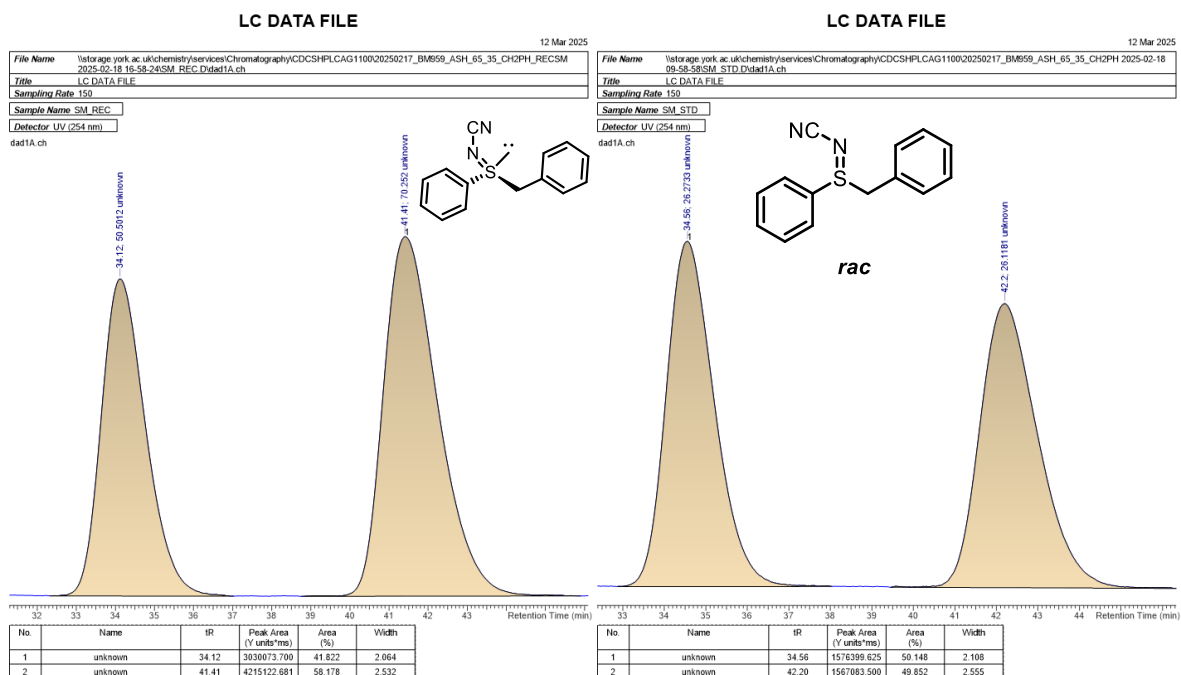

Figure S35. HPLC Data for **(S)-4r**

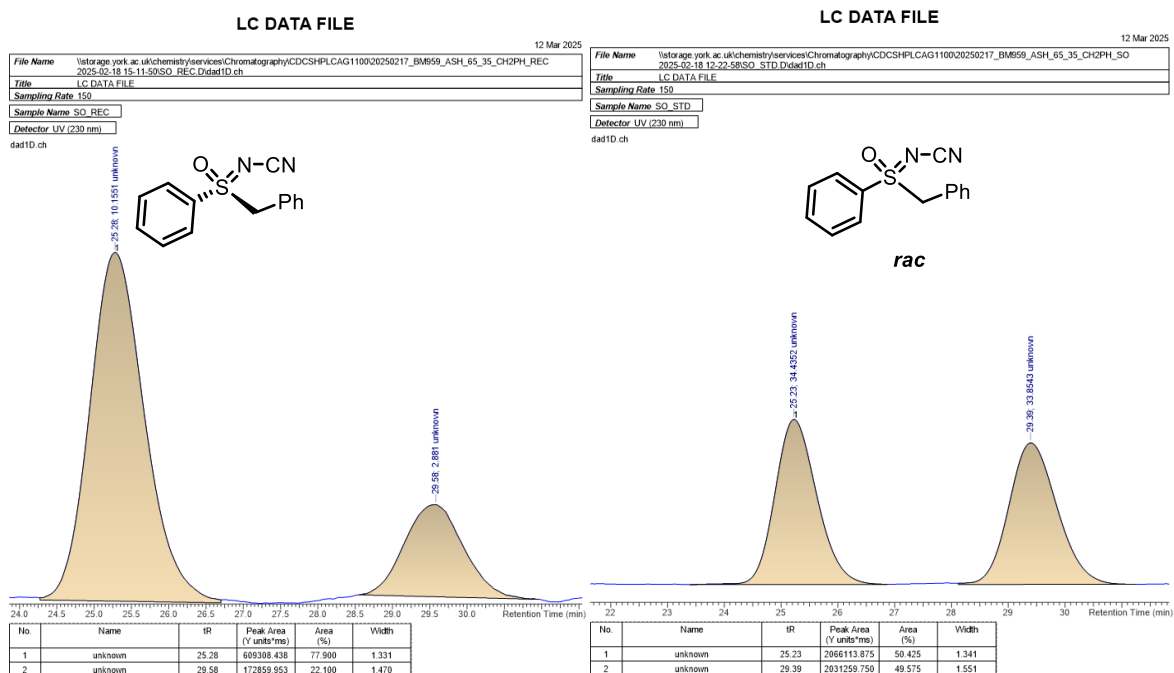

Figure S36. HPLC Data for **(S)-5r**

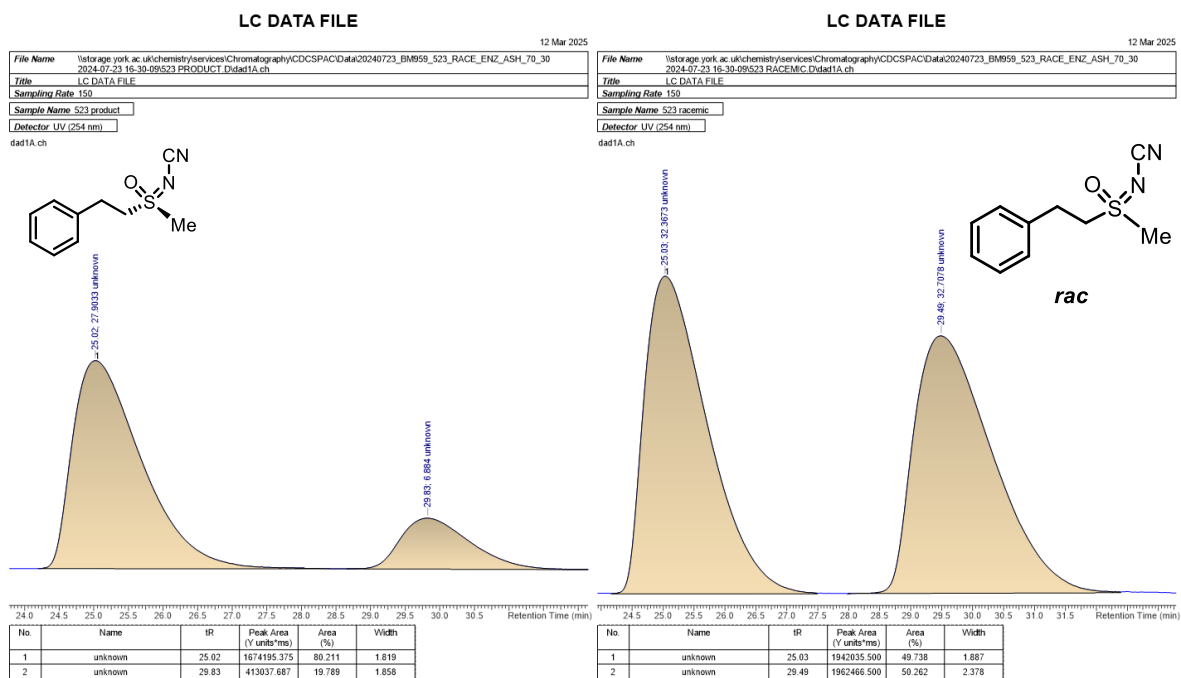

Figure S37. HPLC Data for **(S)-5s**

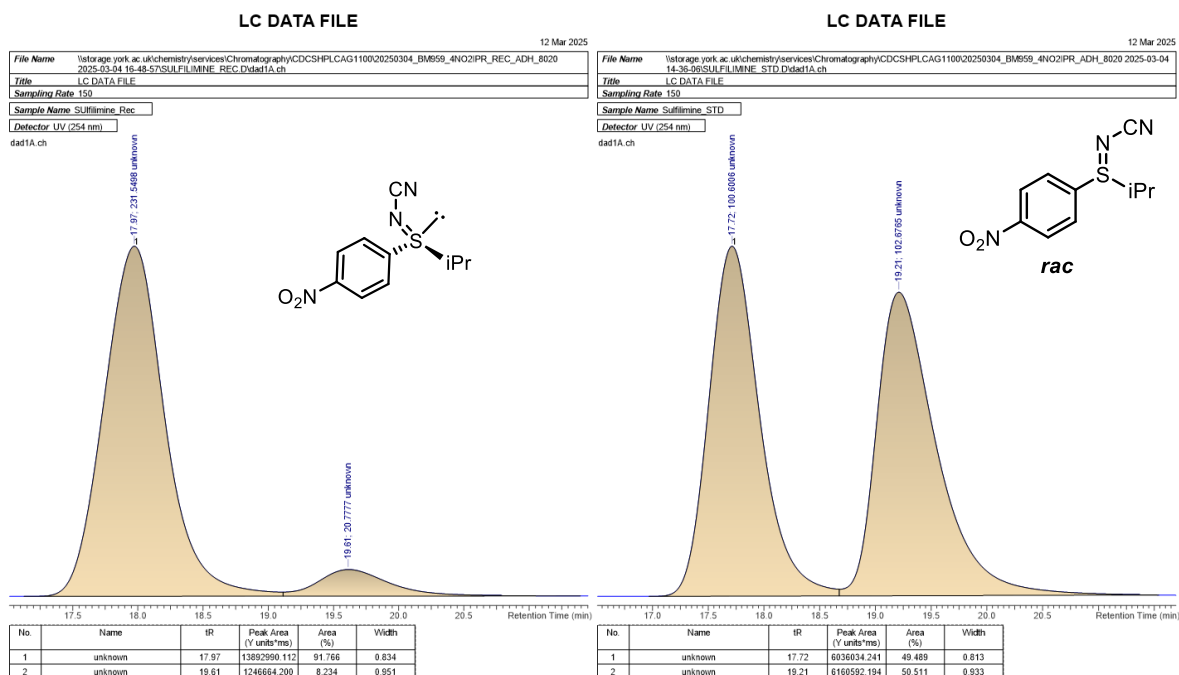

Figure S38. HPLC trace for **(S)-4t**

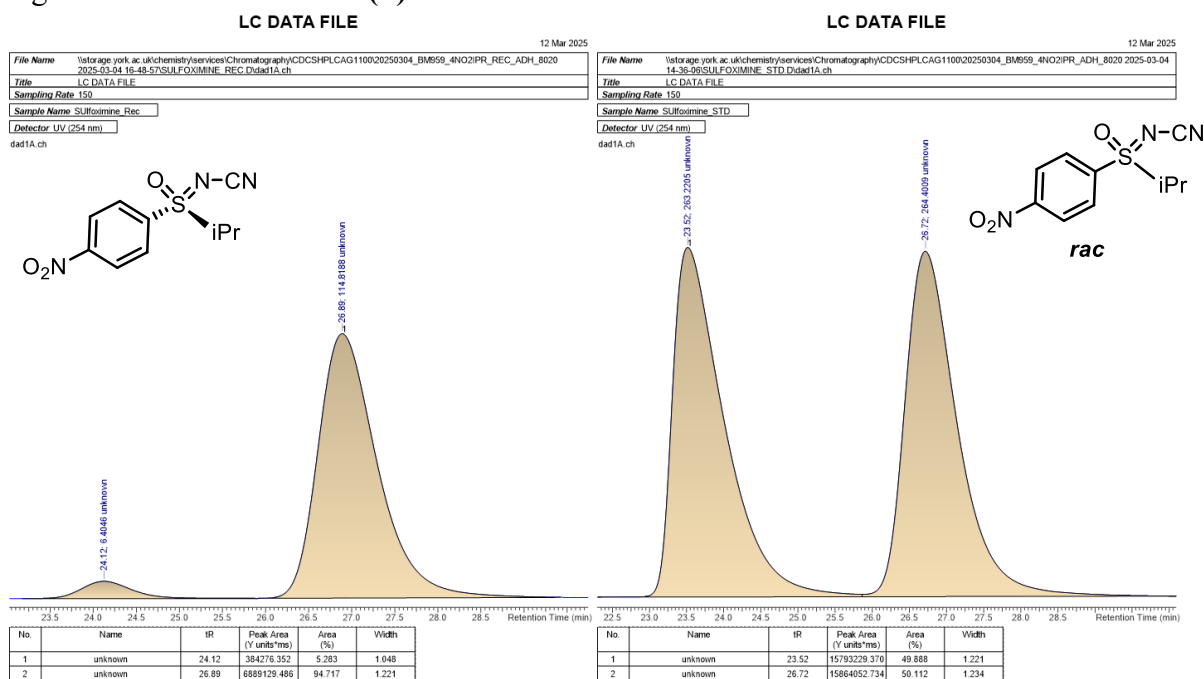

Figure S39. HPLC trace for **(S)-5t**

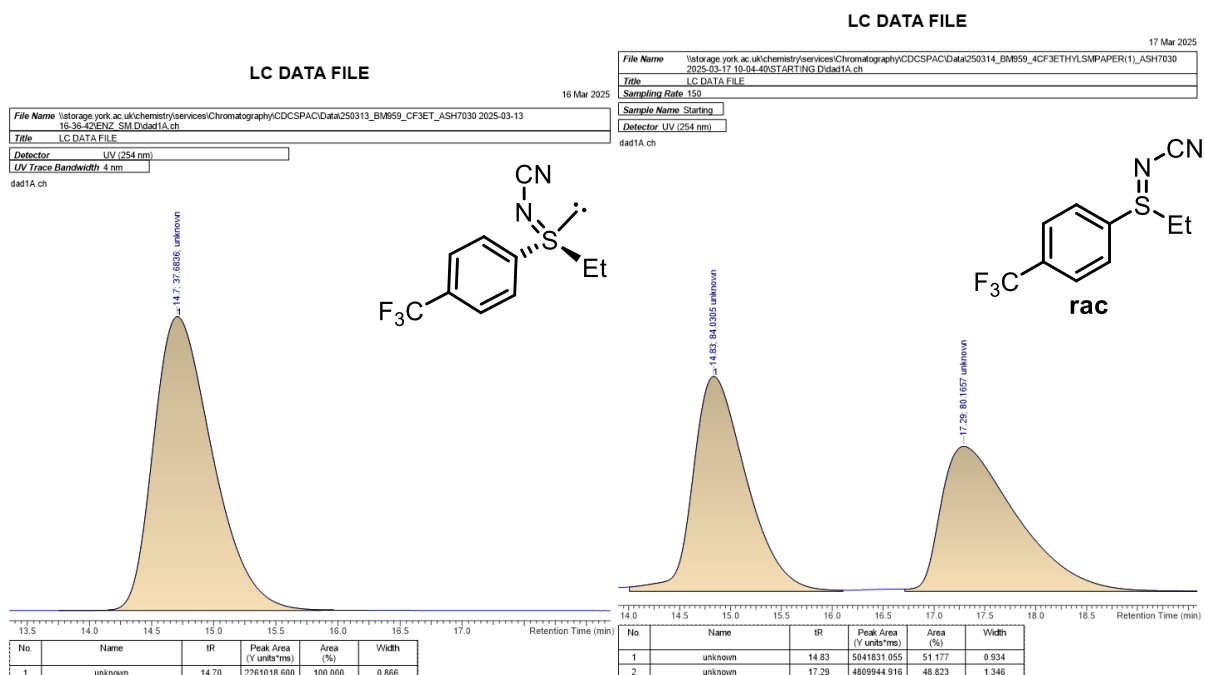

Figure S40. HPLC Data for **(S)-4u**

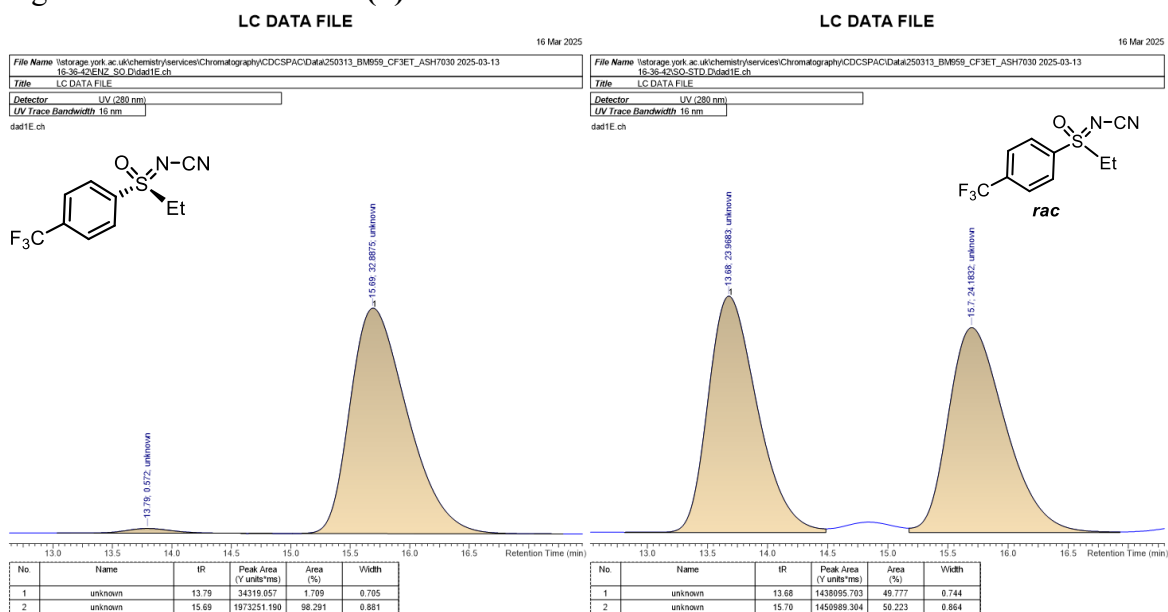

Figure S41. HPLC Data for **(S)-5u**

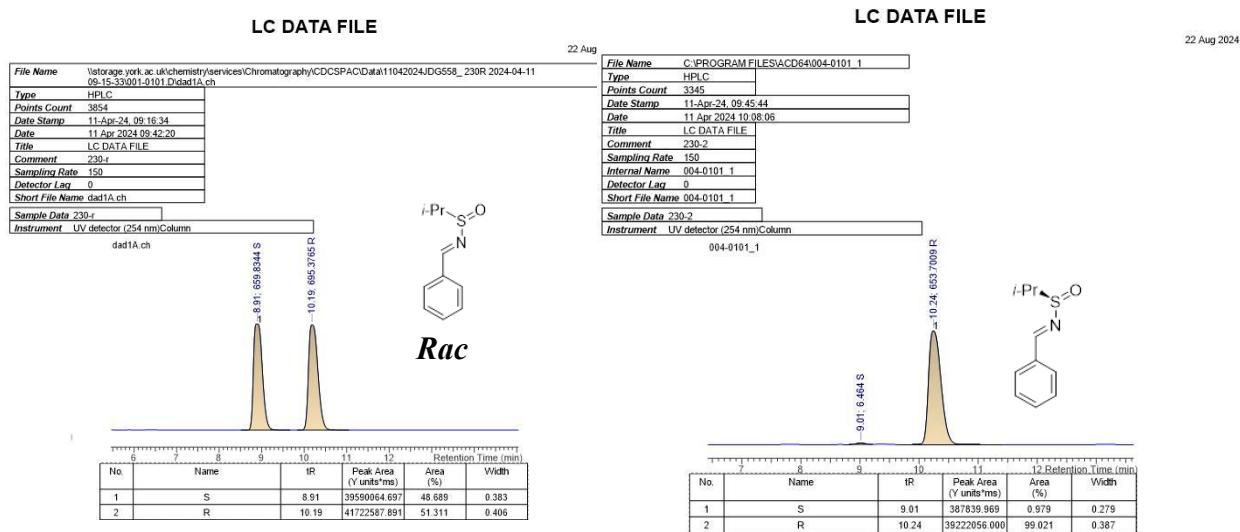

Figure S42. HPLC Data for **(R)-12a**

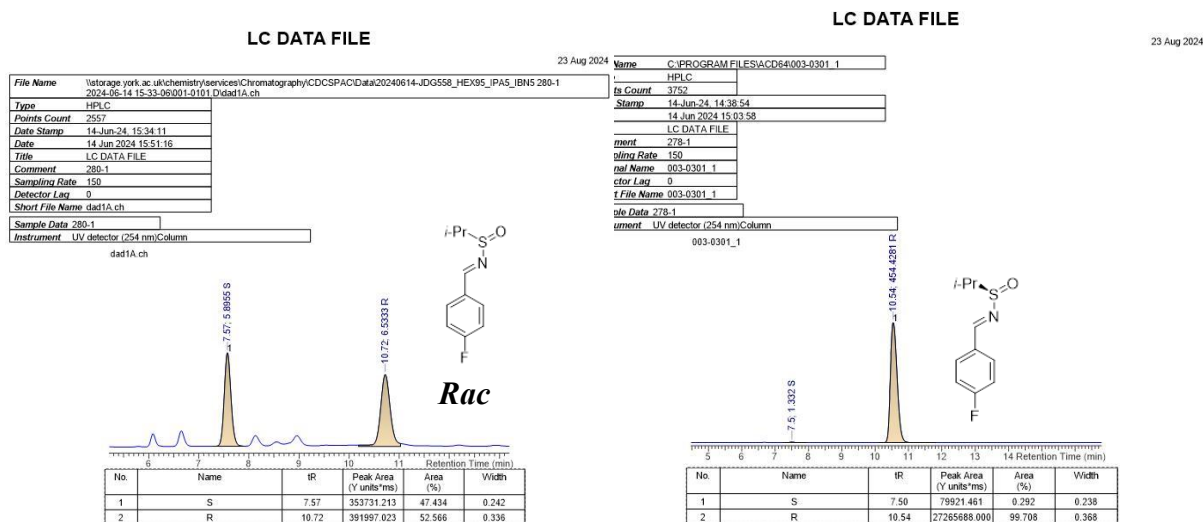

Figure S43. HPLC Data for **(R)-12b**

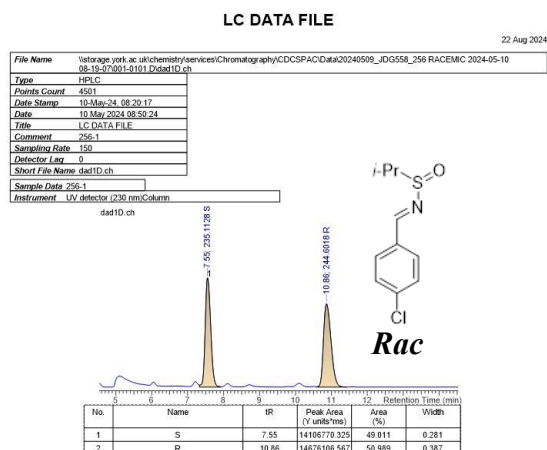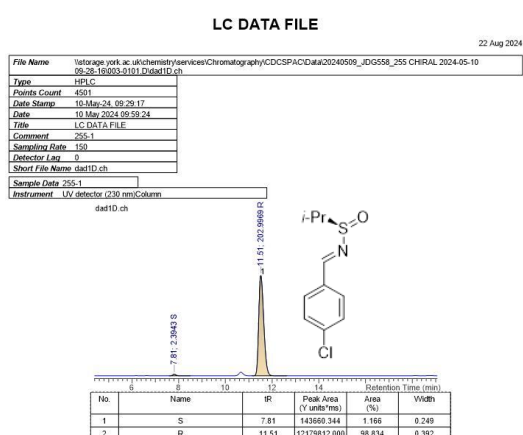

Figure S44. HPLC Data for **(R)-12c**

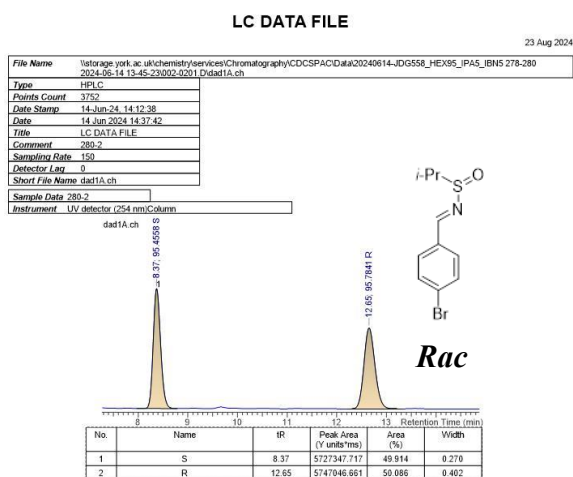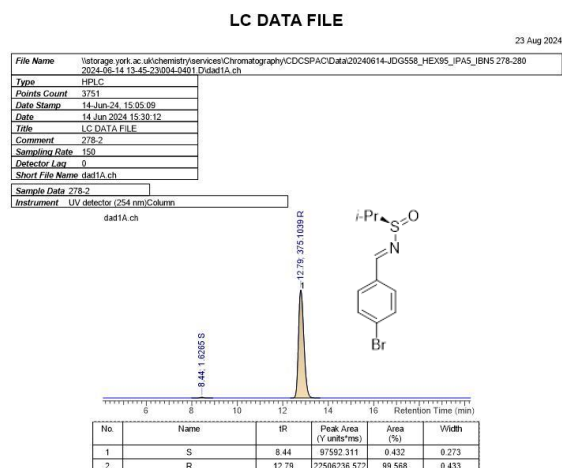

Figure S45. HPLC Data for **(R)-12d**

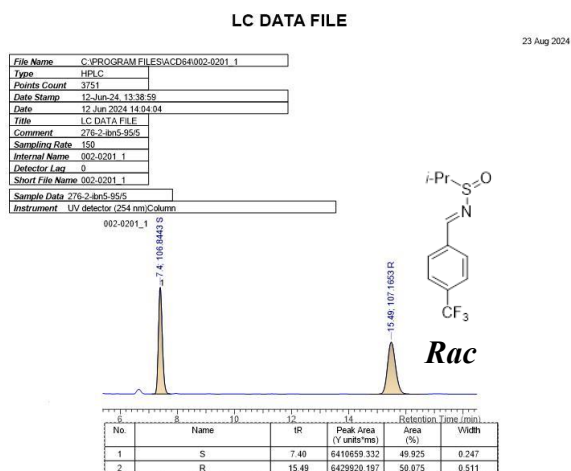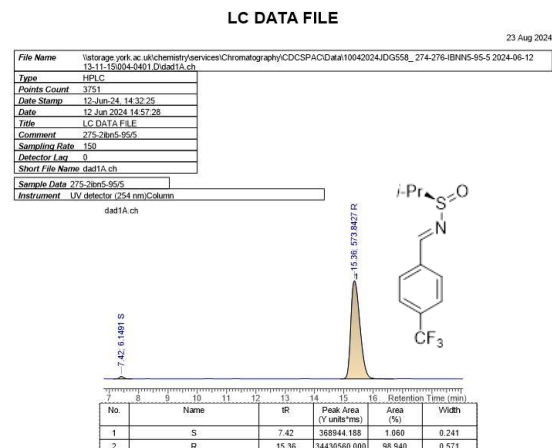

Figure S46. HPLC Data for **(R)-12e**

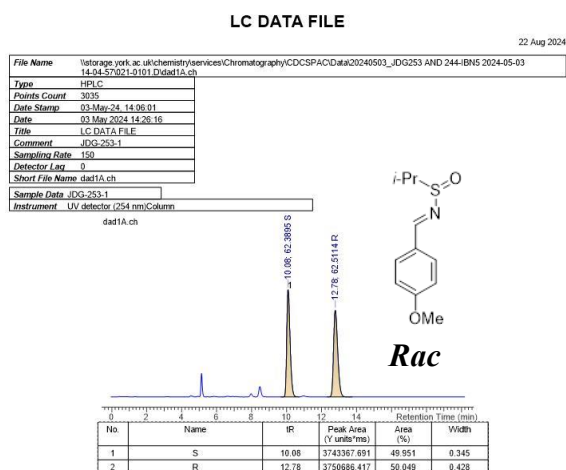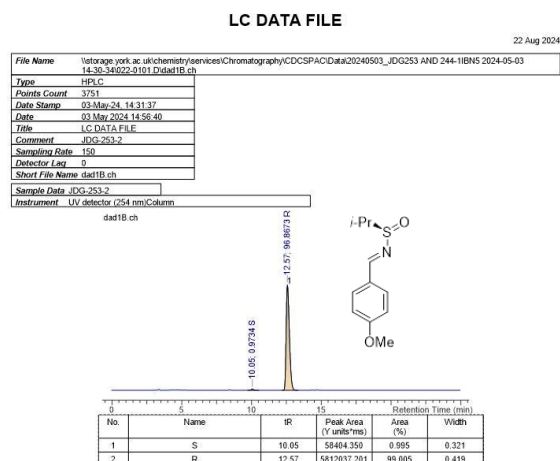

Figure S47. HPLC Data for **(R)-12f**

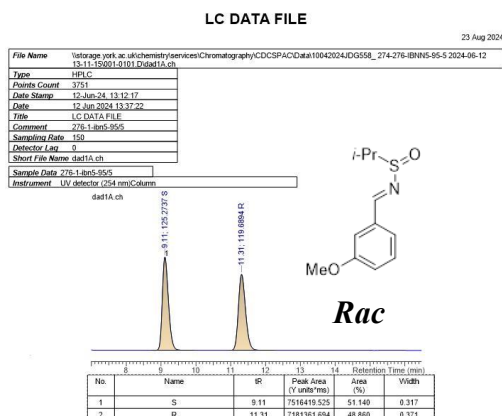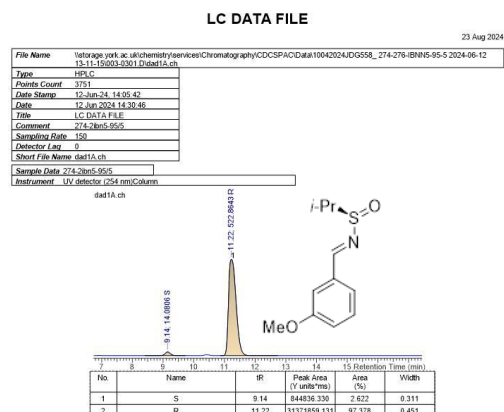



Figure S48. HPLC Data for (*R*)-12g

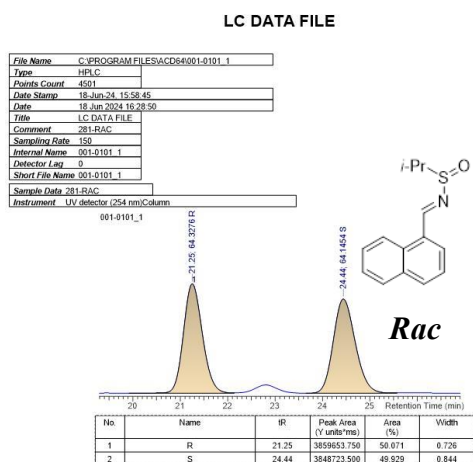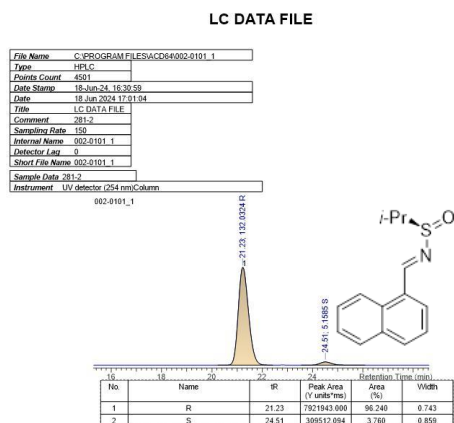

Figure S49. HPLC Data for (*R*)-12h

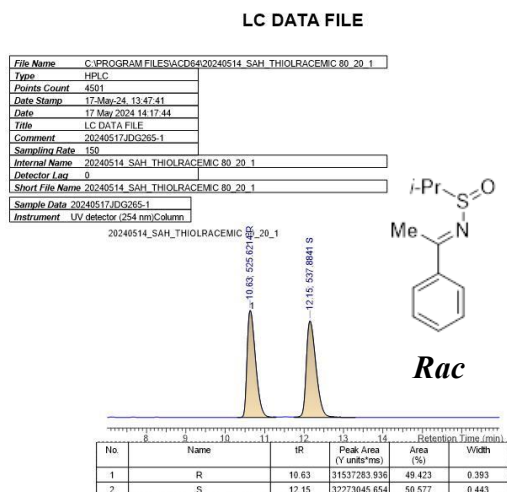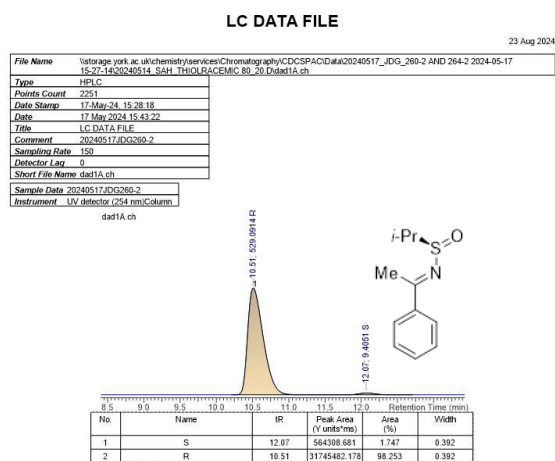

Figure S50. HPLC Data for (*R*)-12i

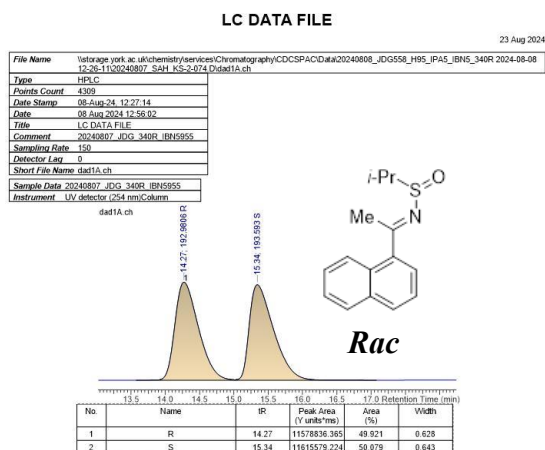

Figure S51. HPLC Data for **(R)-12j**

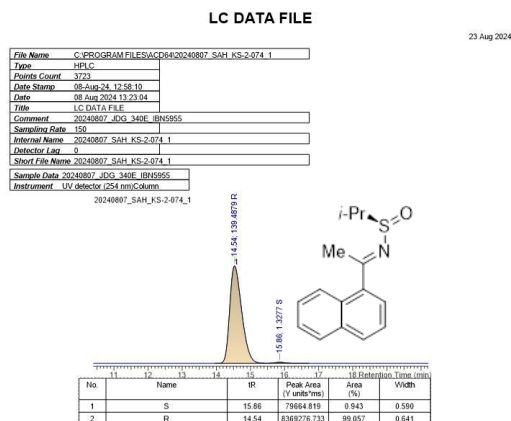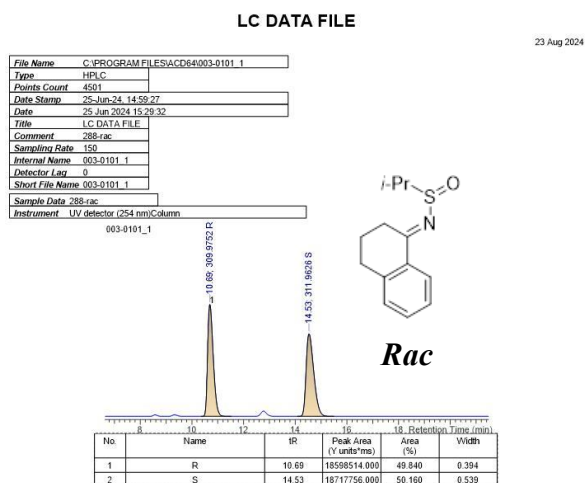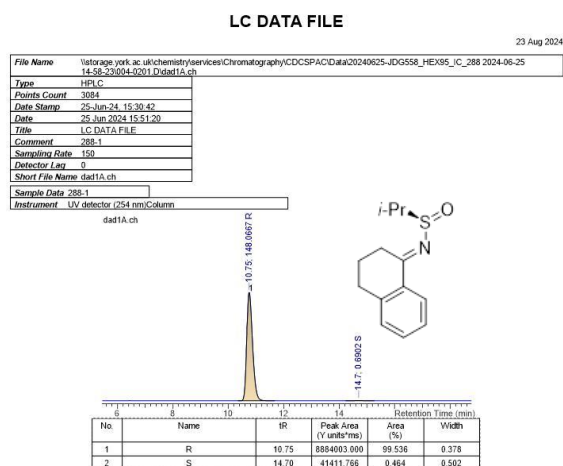

Figure S52. HPLC Data for **(R)-12k**

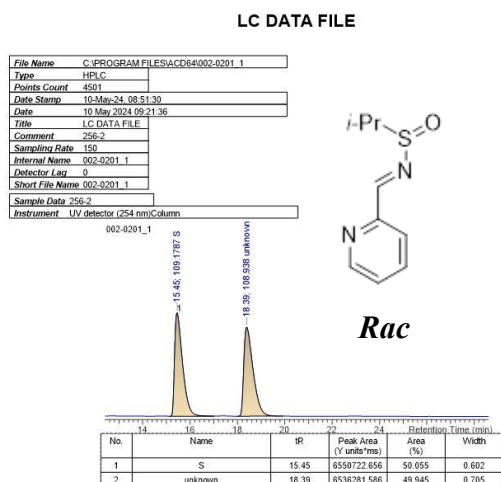

Figure S53. HPLC Data for **(R)-121**

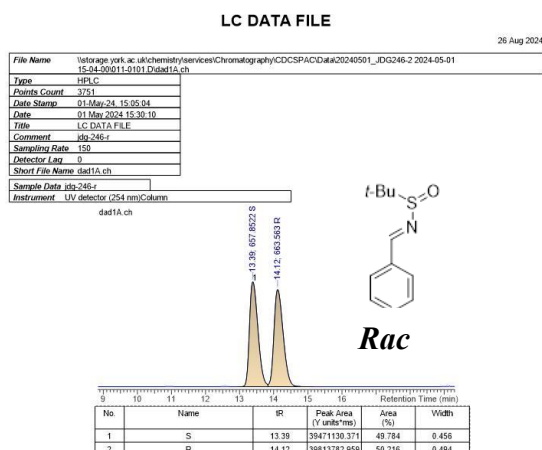

Figure S54. HPLC Data for **(S)-13a**

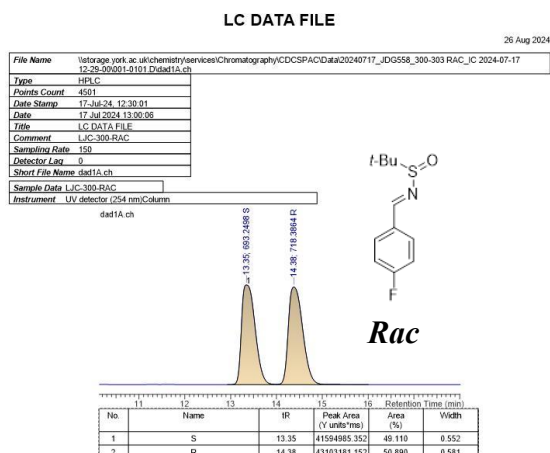

Figure S55. HPLC Data for **(S)-13b**

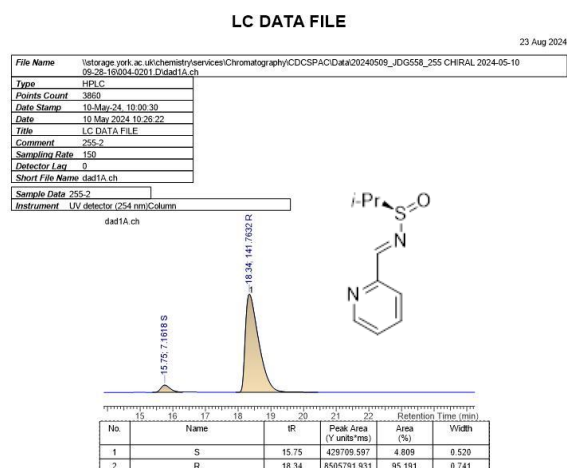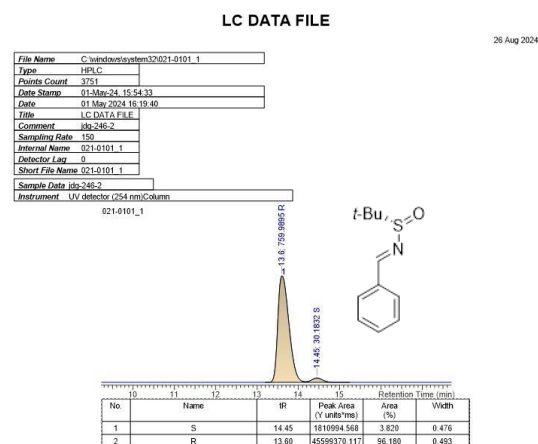

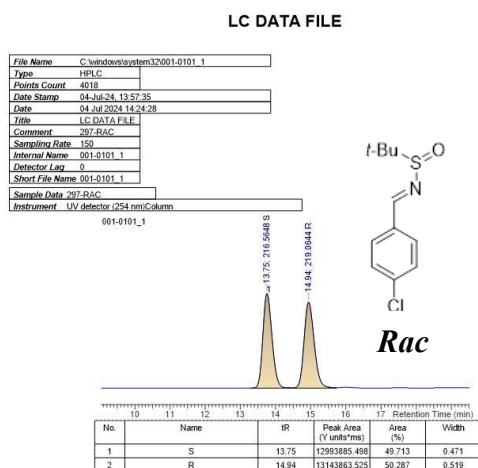

Figure S56. HPLC Data for **(S)-13c**

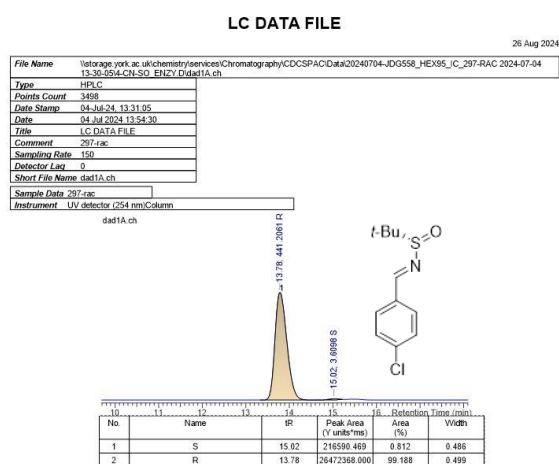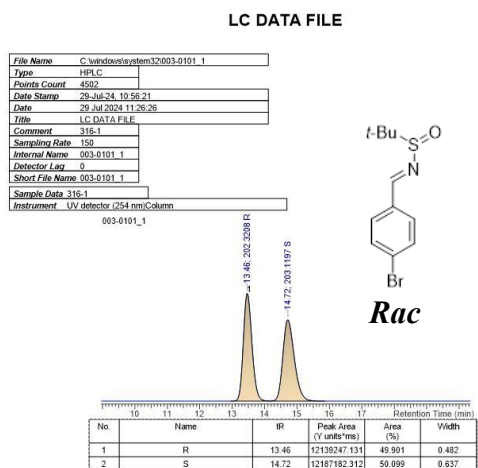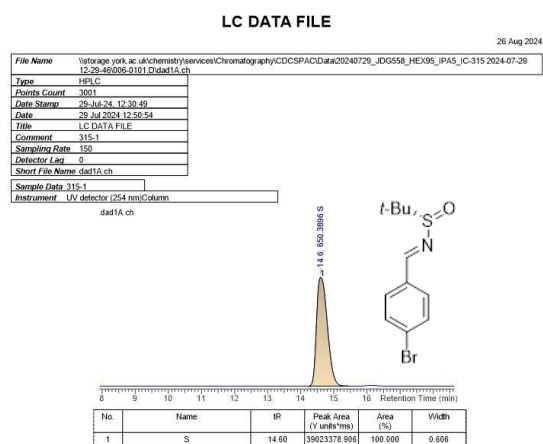

Figure S57. HPLC Data for **(S)-13d**

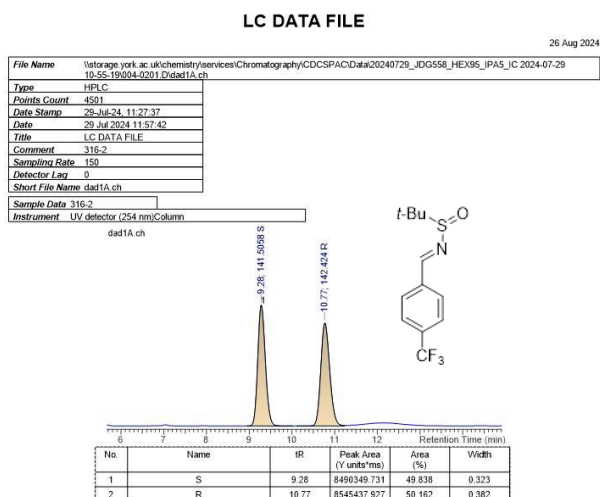

Figure S58. HPLC Data for (S)-13e

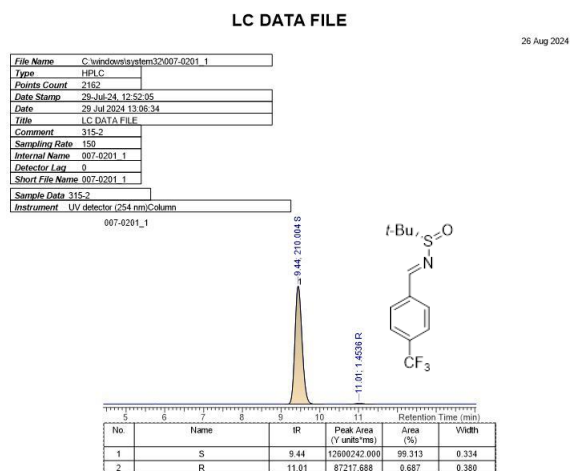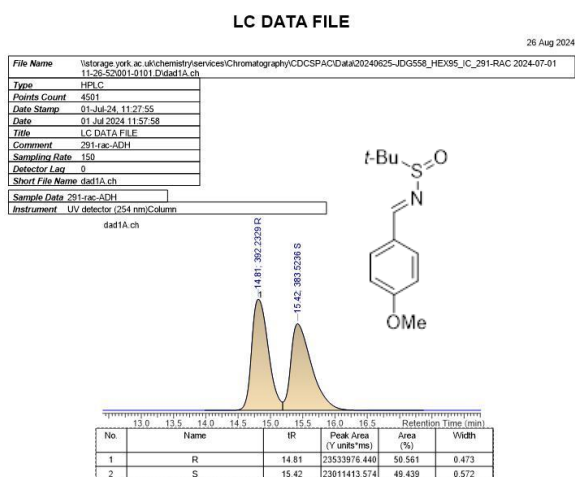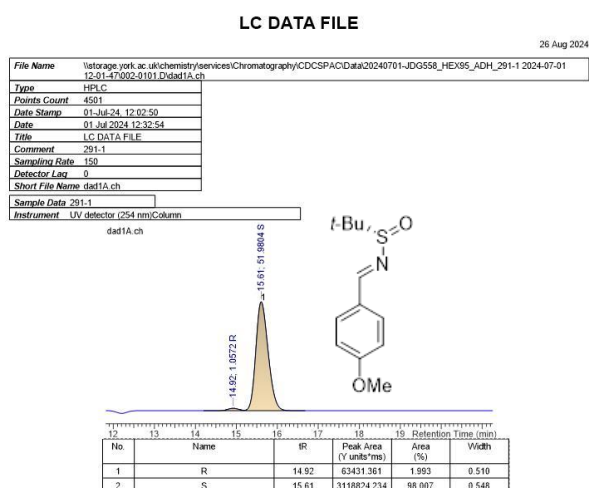

Figure S59. HPLC Data for (S)-13f

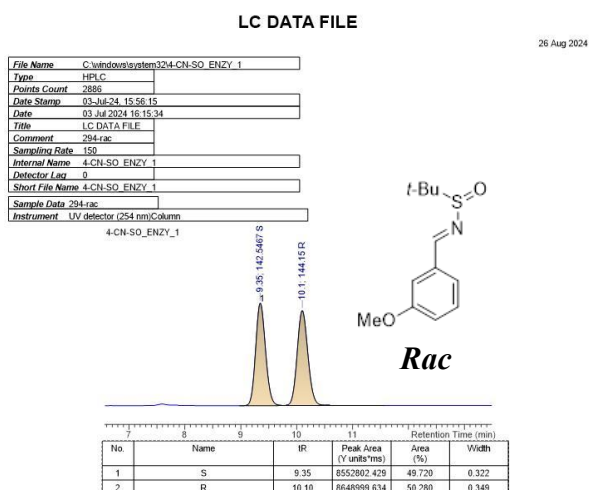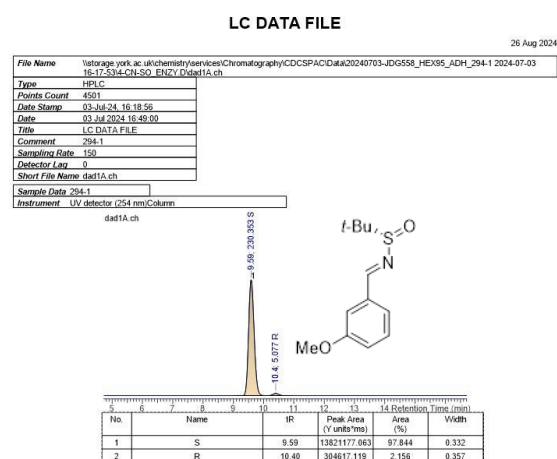

Figure S60. HPLC Data for(S)-13g

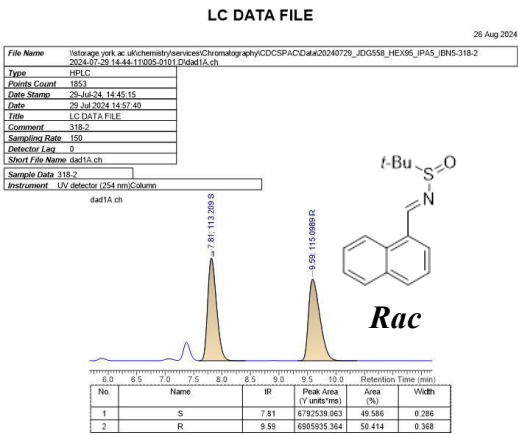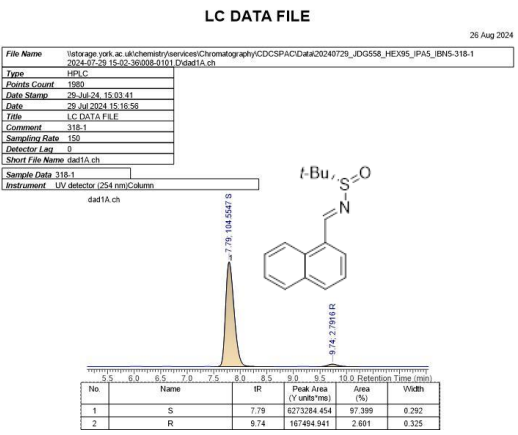

Figure S61. HPLC Data for (S)-13h

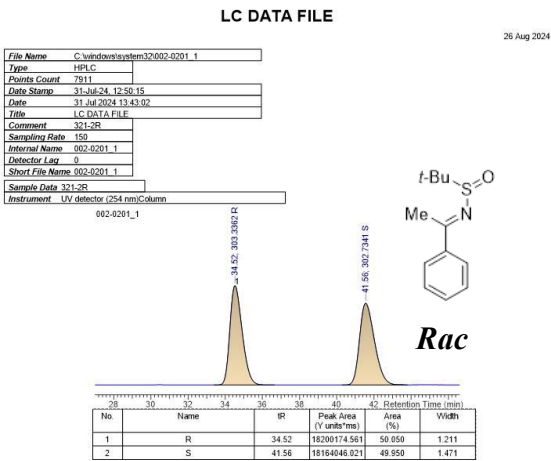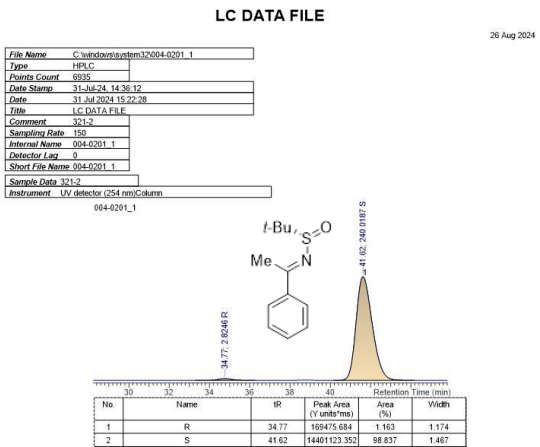

Figure S62. HPLC Data for (S)-13i

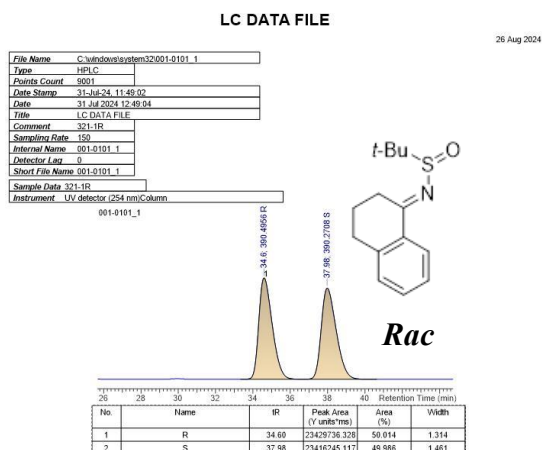

Figure S63. HPLC Data for (S)-13k

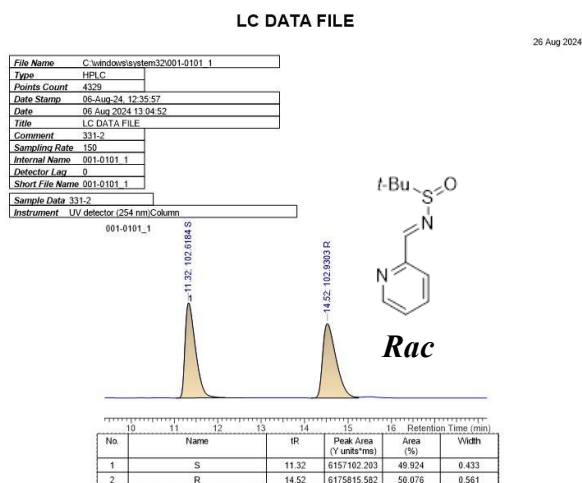

Figure S64. HPLC Data for (S)-13l

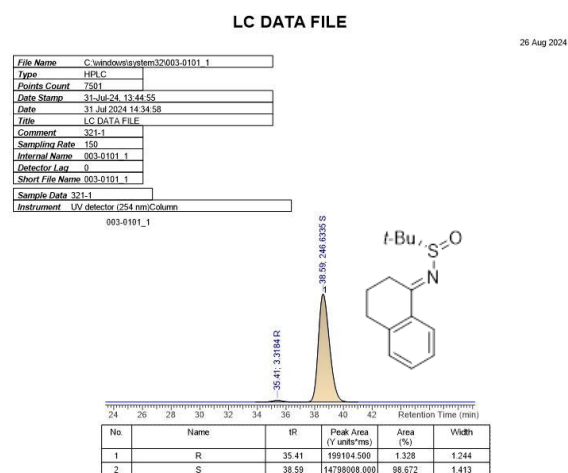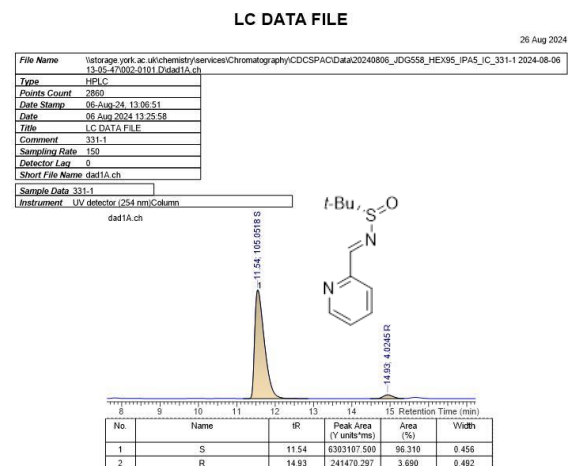



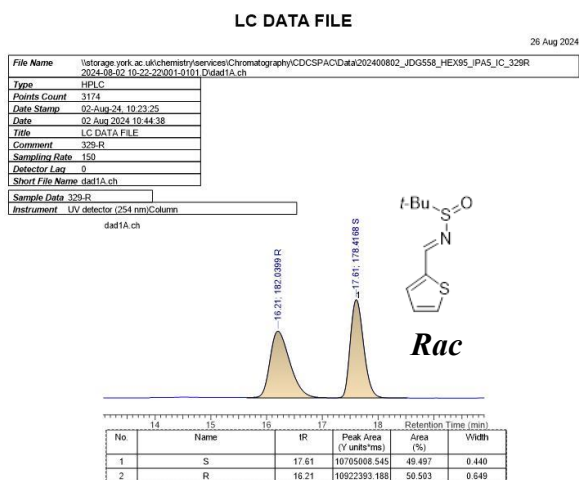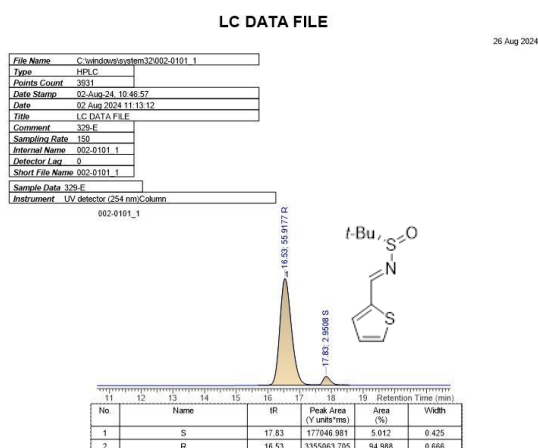

Figure S65. HPLC Data for (S)-13m

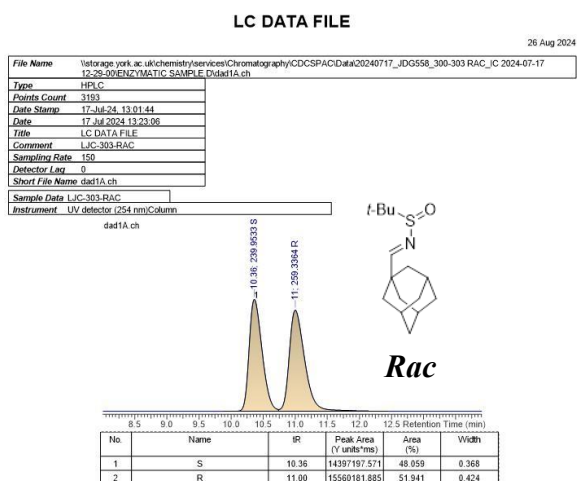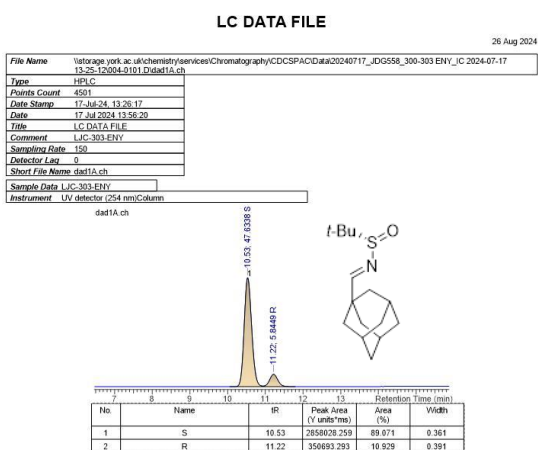

Figure S66. HPLC Data for (S)-13n

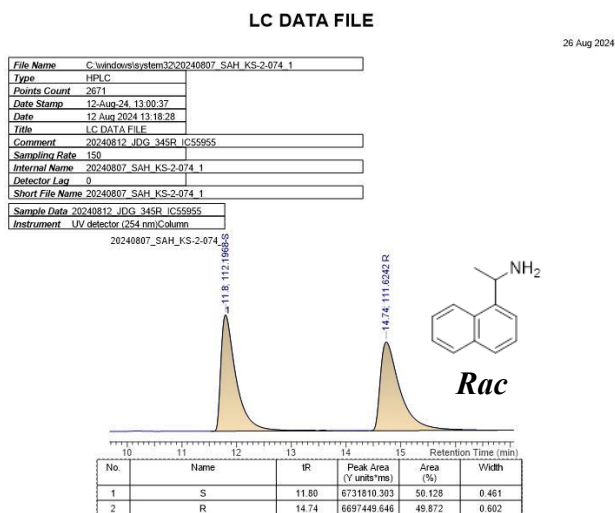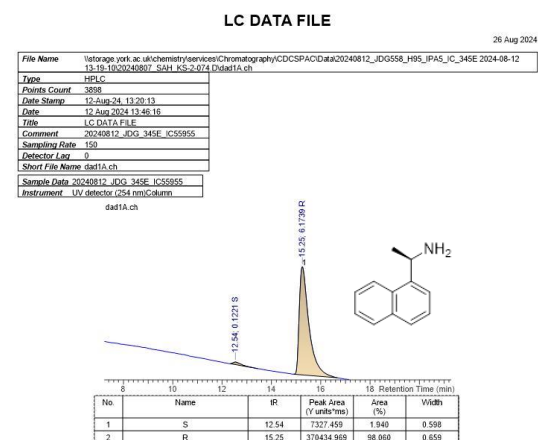

Figure S67. HPLC Data for 14



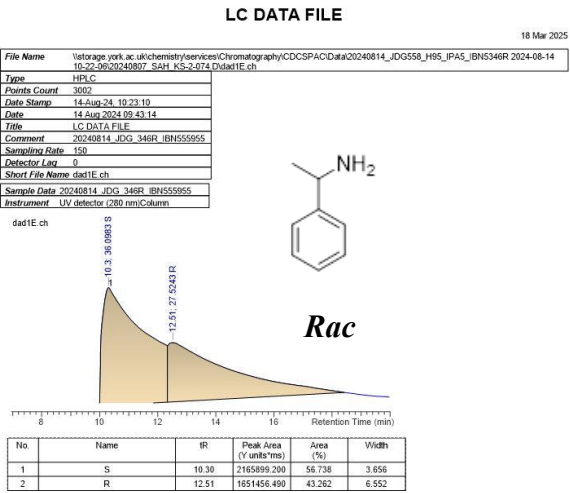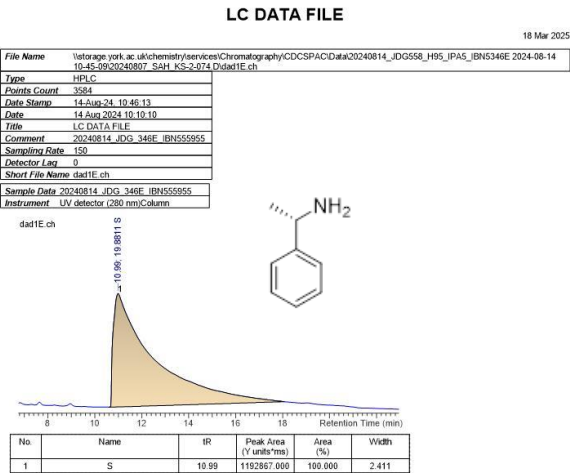

Figure S68. HPLC Data for **18**

## 6) Molecular Docking

Automated docking was performed using AUTODOCK VINA 1.1.2.<sup>[33]</sup> Coordinates for the ligands (*R*)-**4e** and **6** were prepared using ELBOW<sup>[34]</sup> in PHENIX.<sup>[35]</sup> The appropriate pdbqt files for the models of artUPO and *rAae*UPO-Pada-I-H and the ligands were prepared in AUTODOCK Tools from structures with PDB codes 7ZNM<sup>[32]</sup> and 6EL0<sup>[36]</sup> respectively and into each of which had been modelled heme with Compound I from P450 structure 1DZ9.<sup>[37]</sup> The active site of artUPO was contained in a grid size of 34 Å × 34 Å × 34 Å (corresponding to x, y, z) with 1 Å spacing, centred around the catalytic centre at positions -2.55 Å × 5.28 Å × -27.21 Å (corresponding to x, y, z). The active site of *rAae*UPO-PaDa-I was contained in grid sizes of 34 Å × 34 Å × 34 Å (corresponding to x, y, z) with 1 Å spacing, centred around the catalytic centre at positions -2.26 Å × 4.29 Å × -25.20 Å (corresponding to x, y, z). These values were generated using AutoGrid in the AUTODOCK Tools interface. The dockings were performed by VINA, therefore the posed dockings were below 2 Å r.m.s.d. The results generated by VINA were visualised in AUTODOCK Tools 1.5.6 where the ligand conformations were assessed based upon lowest VINA energy. Figure SXA shows the active site of artUPO with substrate (*R*)-**4e**; Figure SXB shows a superimposition of the active sites of artUPO and *rAae*UPO-PaDa-I-H with substrate **6**.

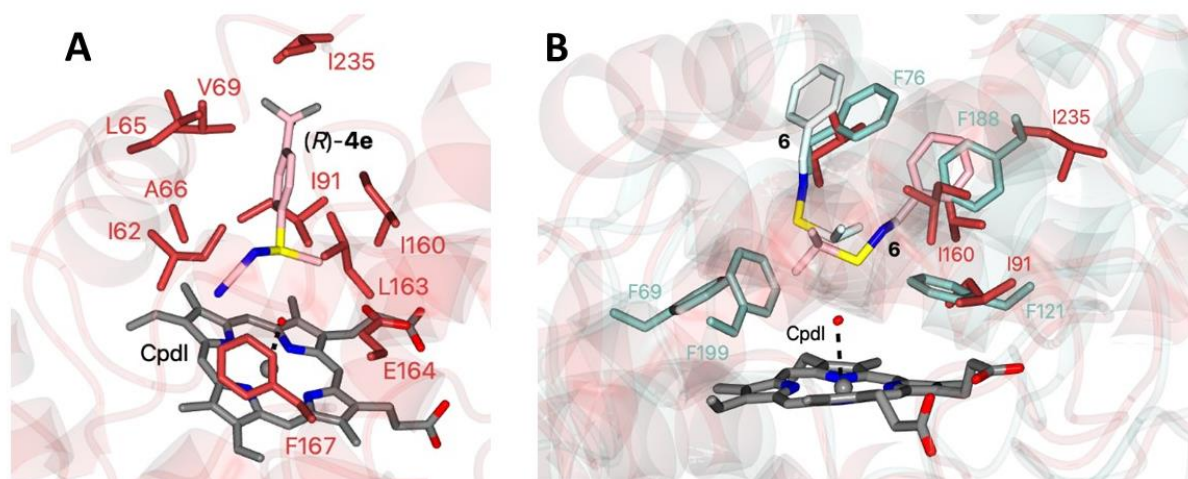

**Figure S69.** A. Active site of artUPO (from 7ZNM; carbon atoms in red) with (*R*)-**4e** modelled using Autodock VINA.<sup>[33]</sup> B. Superimposition of active sites of artUPO (from 7ZNM; carbon atoms in red) and *Aae*UPO-PaDa-I (from 6EL0; blue) with **6** (pink for artUPO and light blue for *Aae*UPO-PaDa-I) modelled using Autodock VINA.<sup>[33]</sup>

# 7) $^1\text{H}$ , $^{13}\text{C}$ and $^{19}\text{F}$ NMR spectra

Data for **4a**

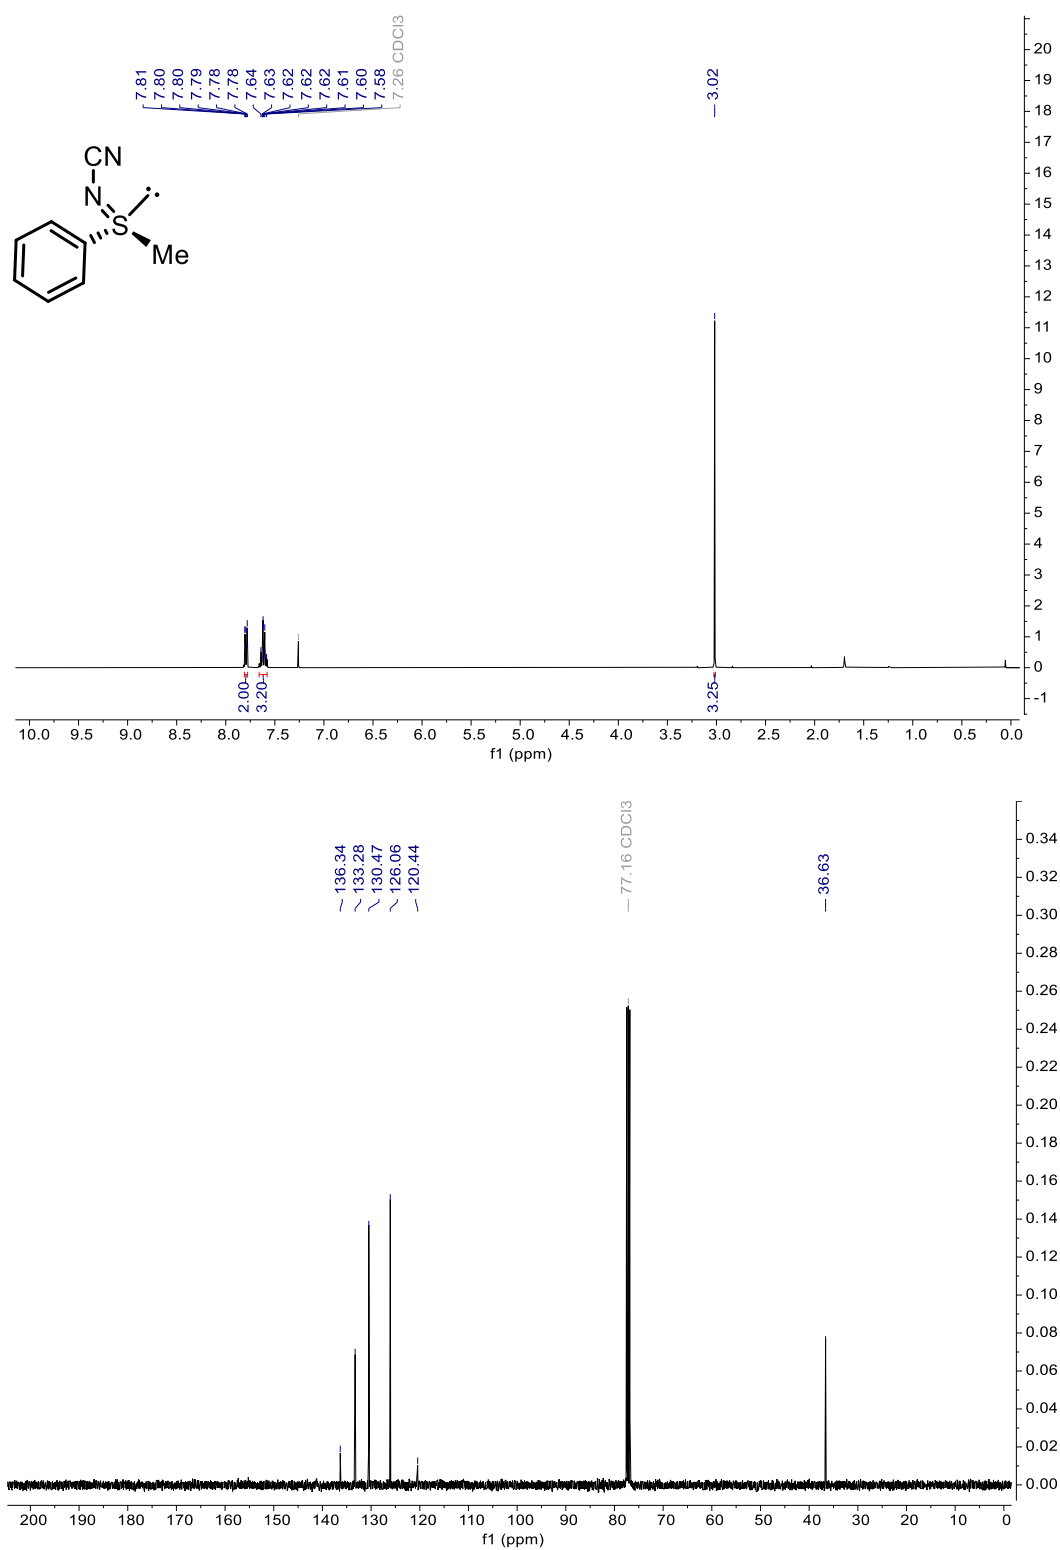

# Data for **4b**

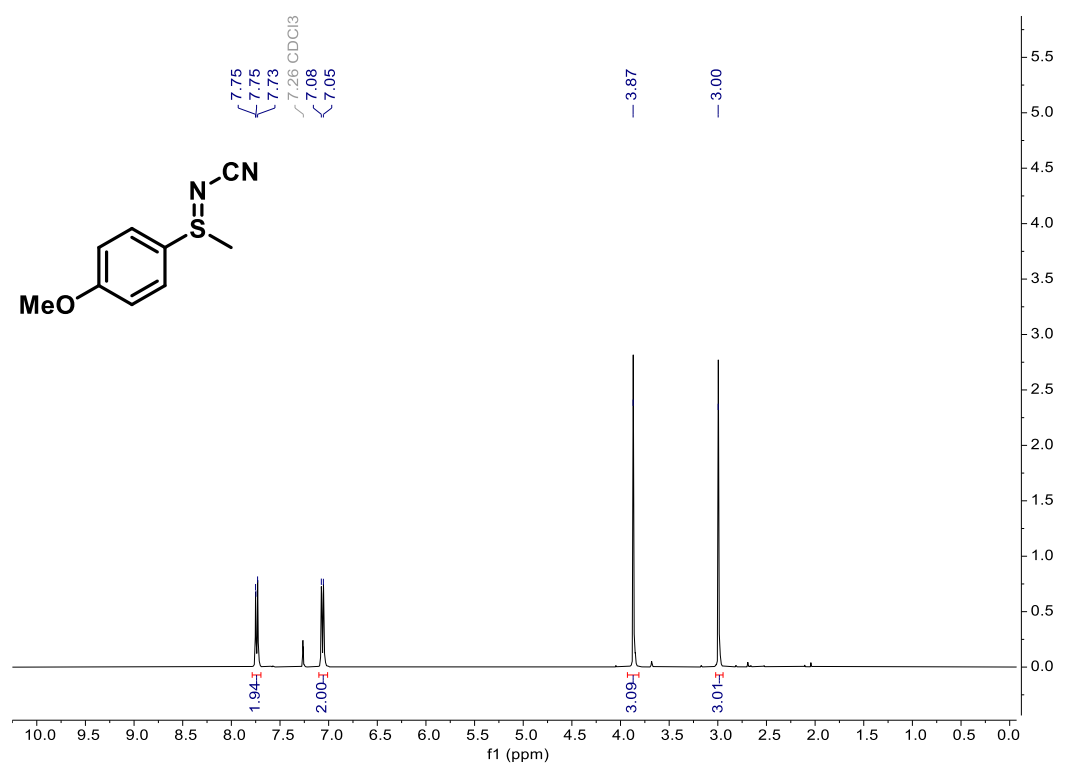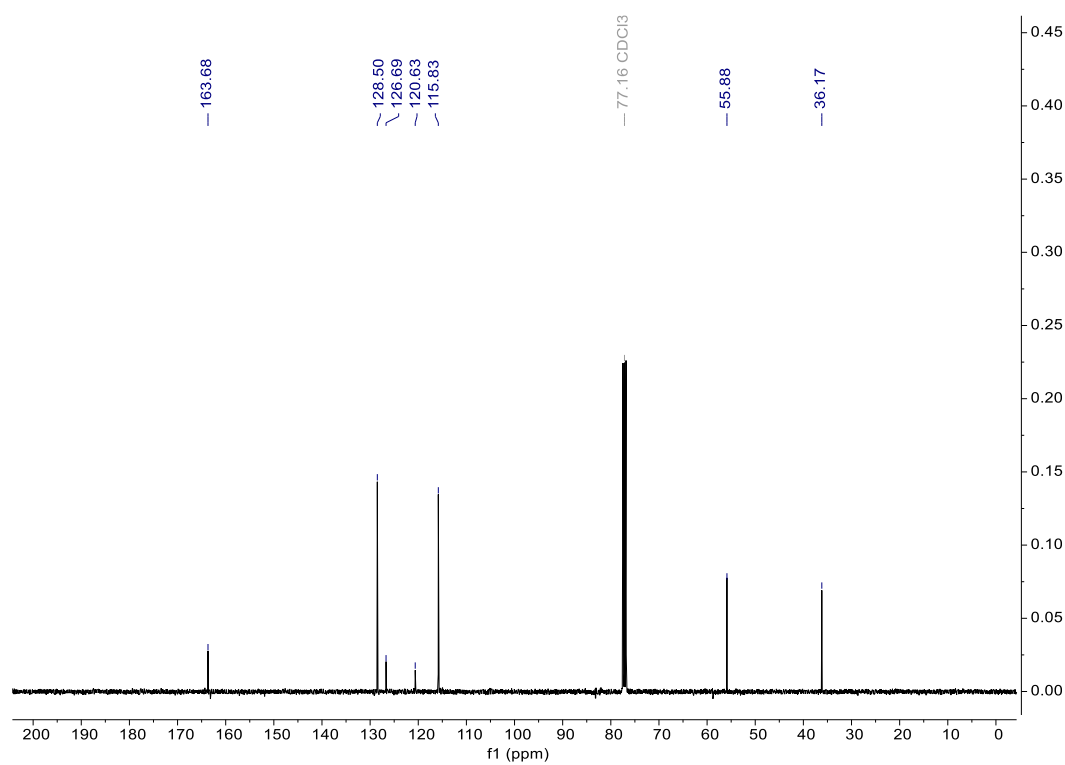

Data for **4c**:

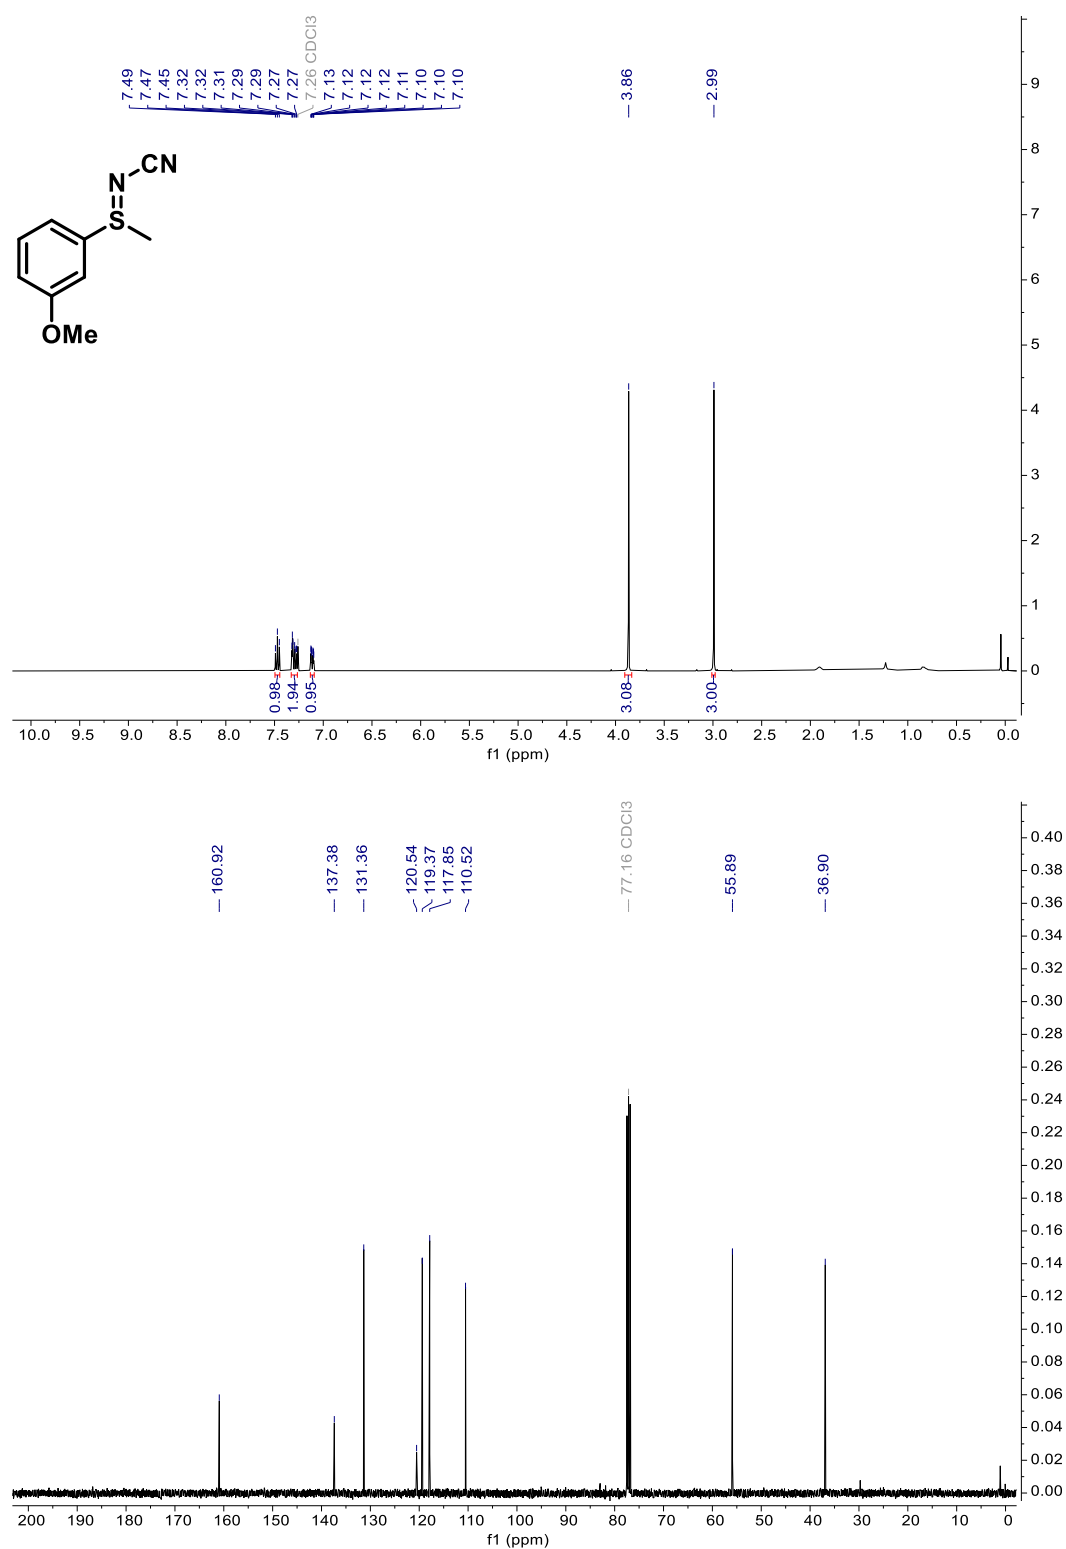

Data for **4d**:

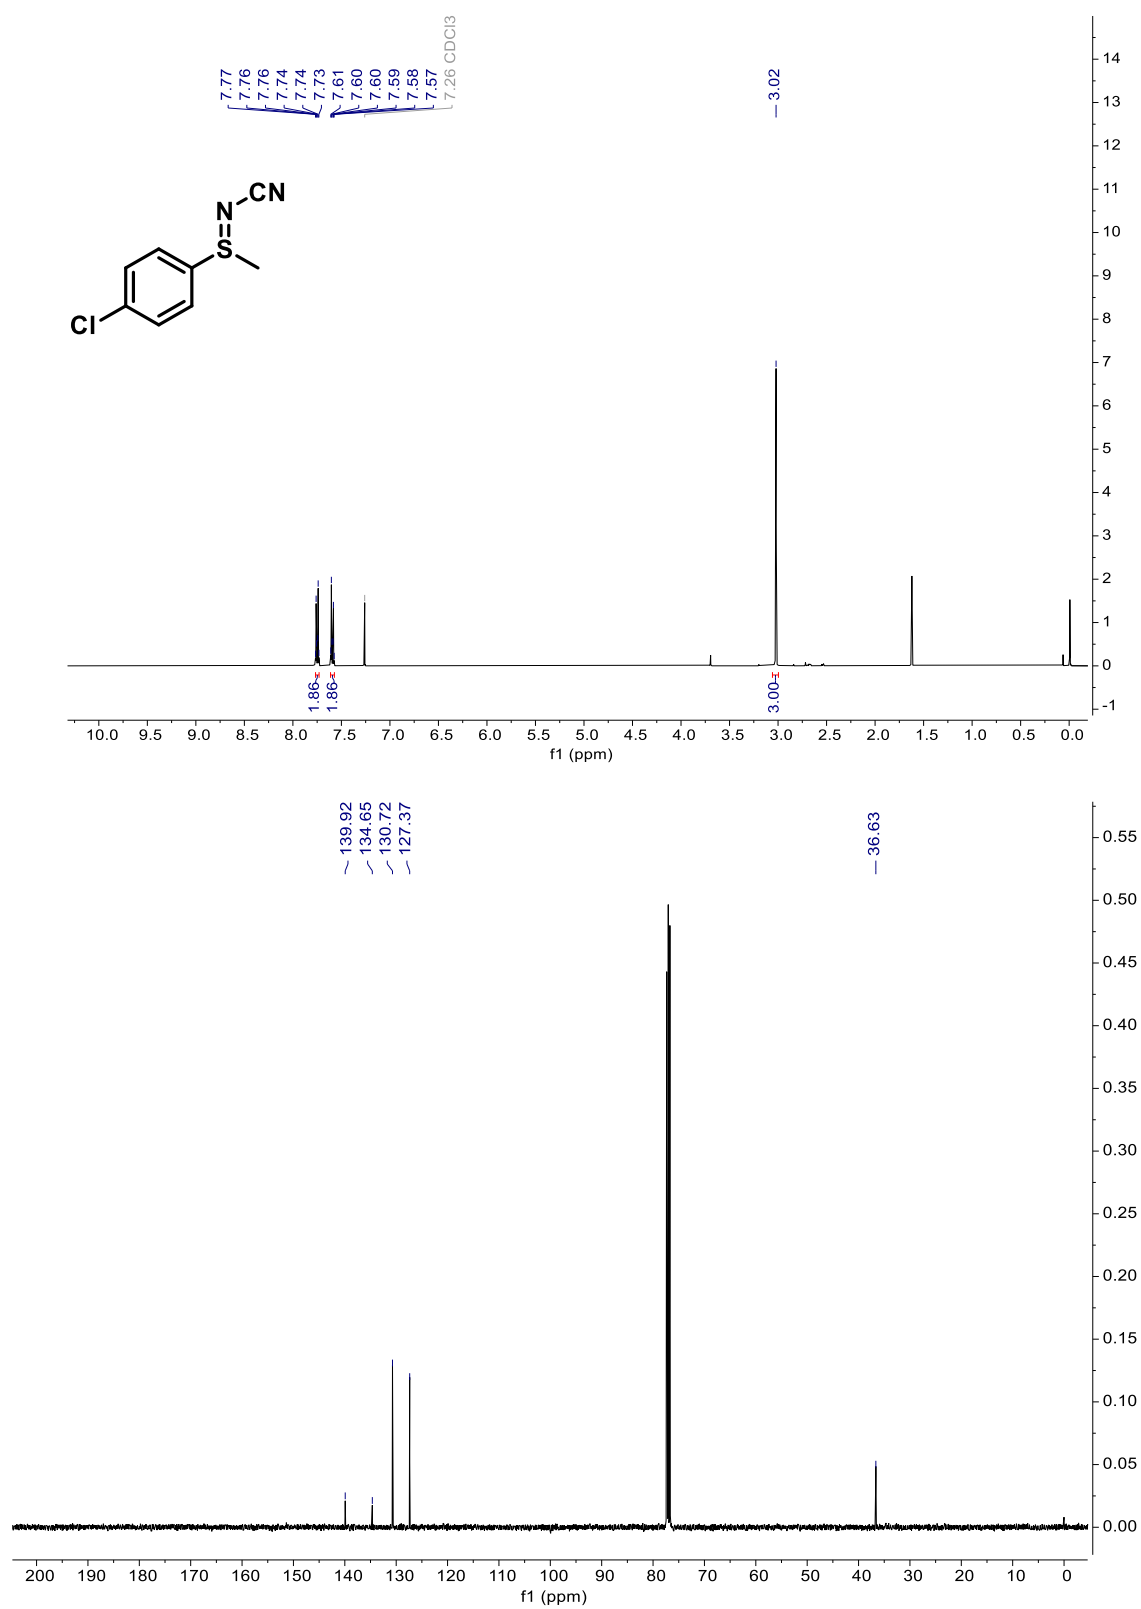

Data for **4e**

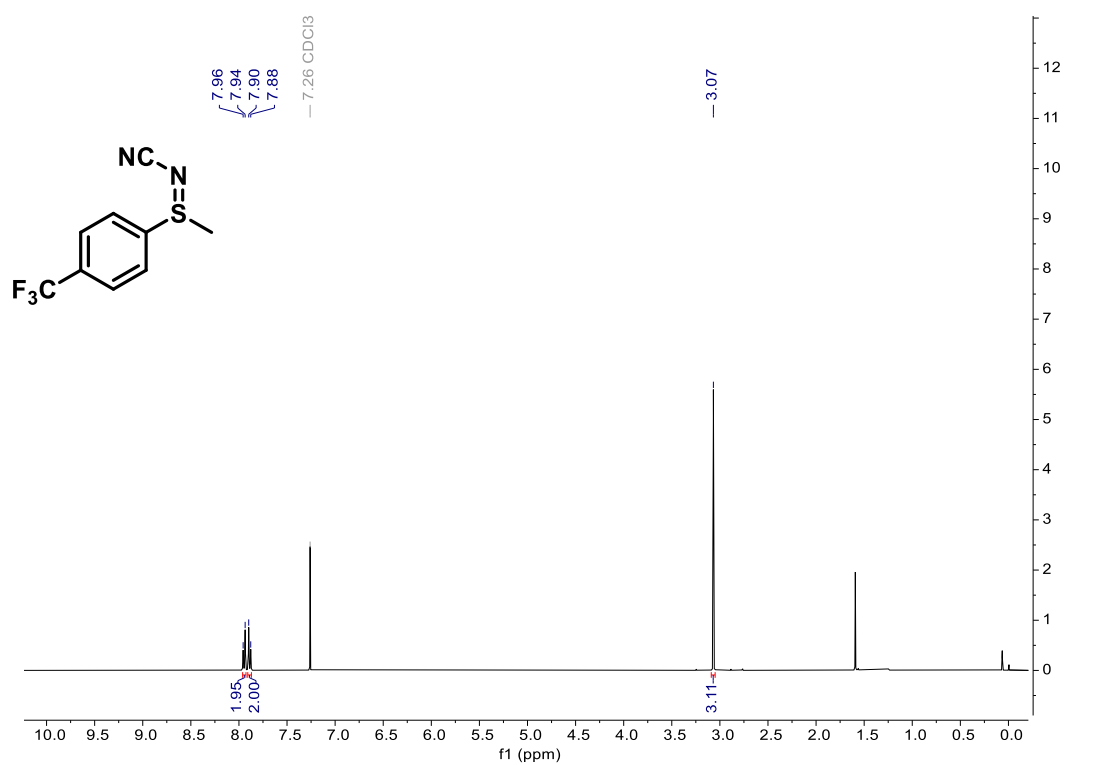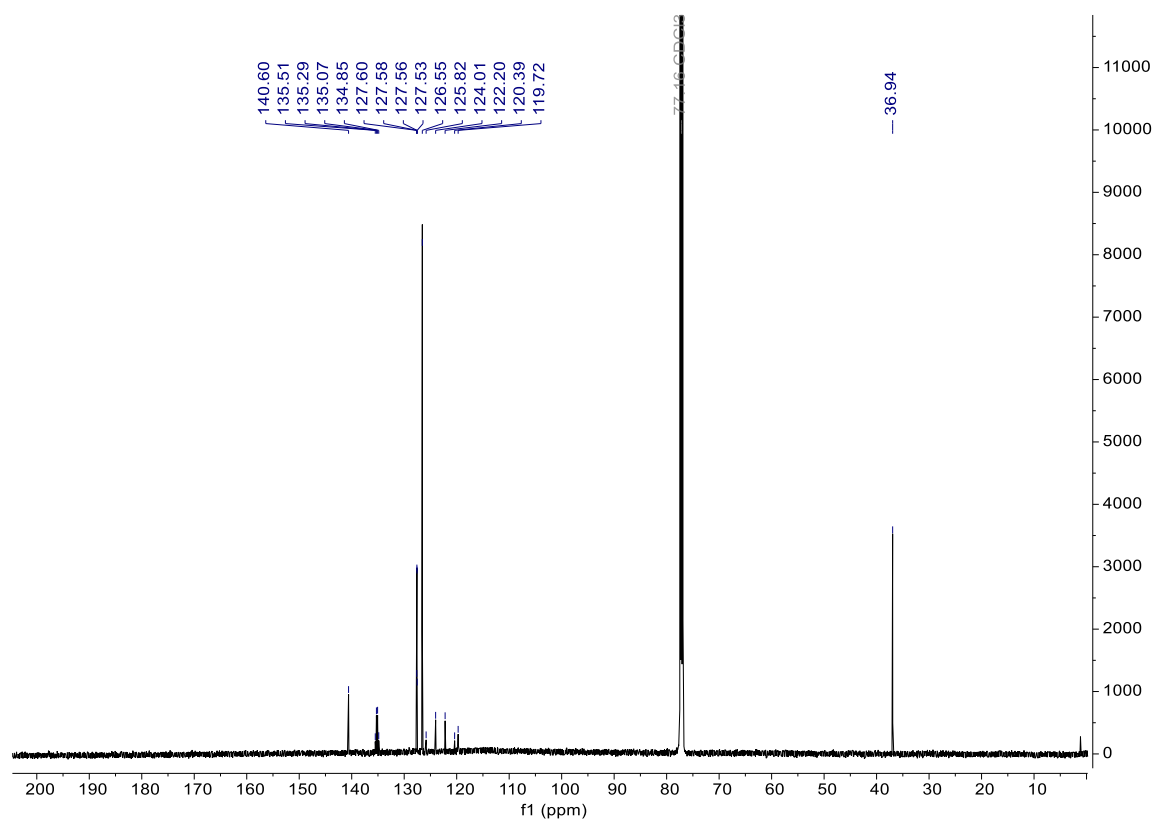

Data for **4f**:

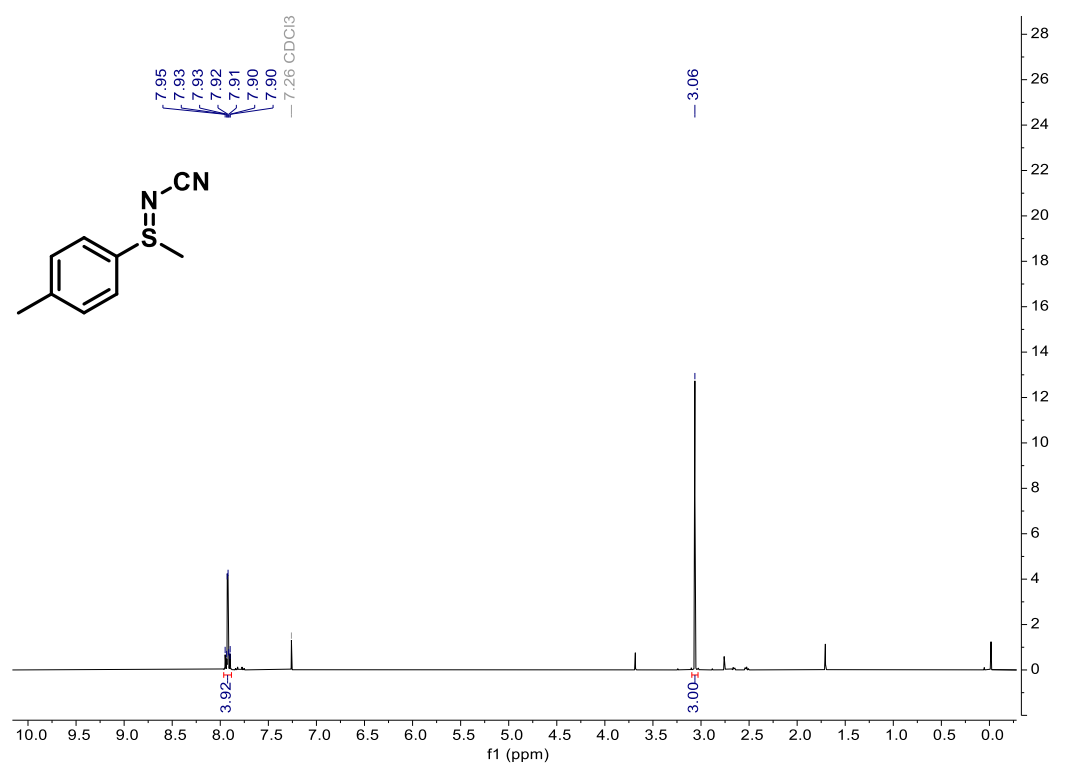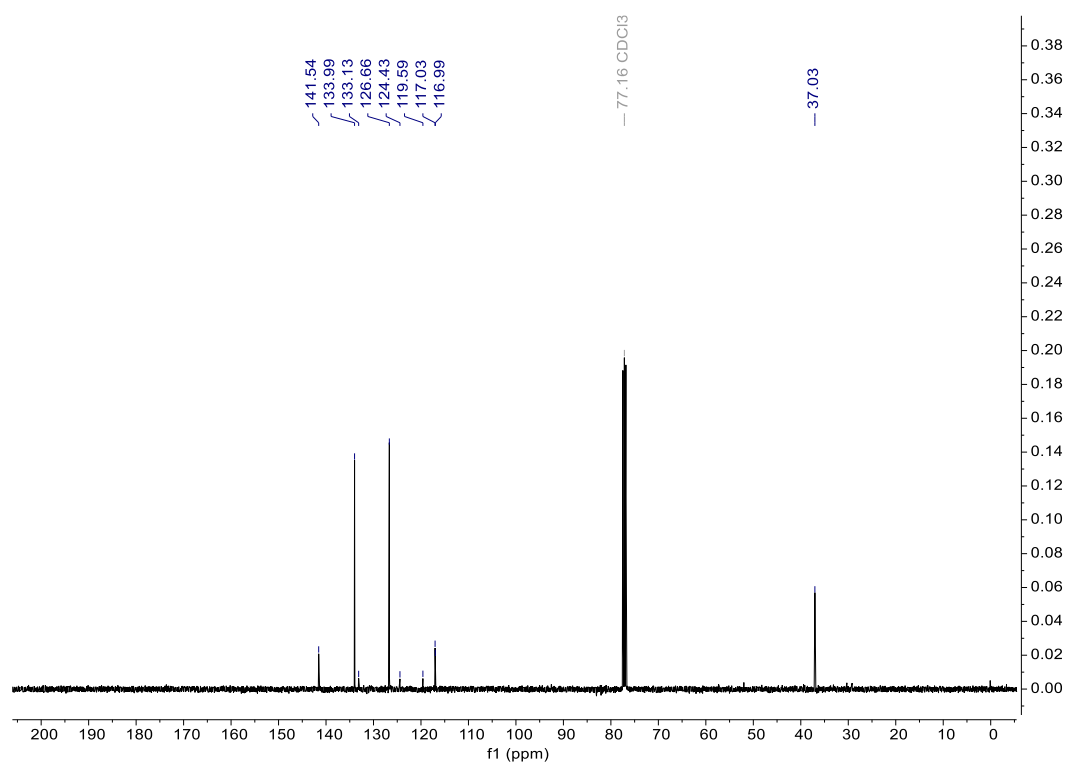



# Data for **4g**

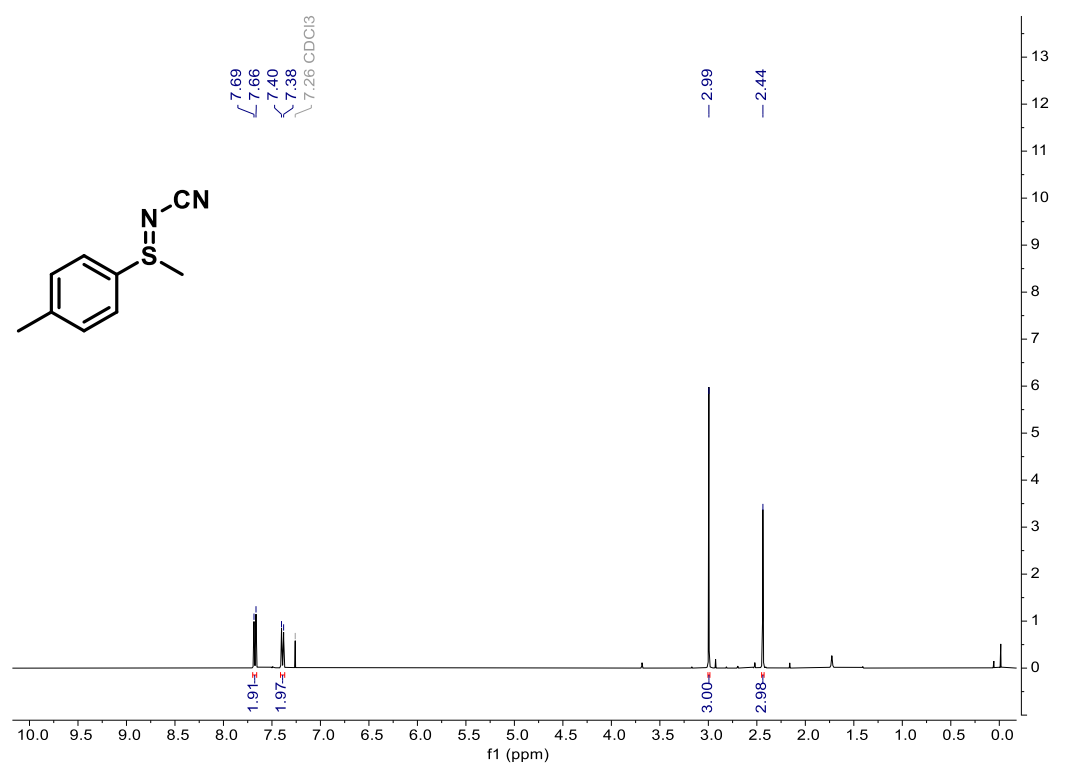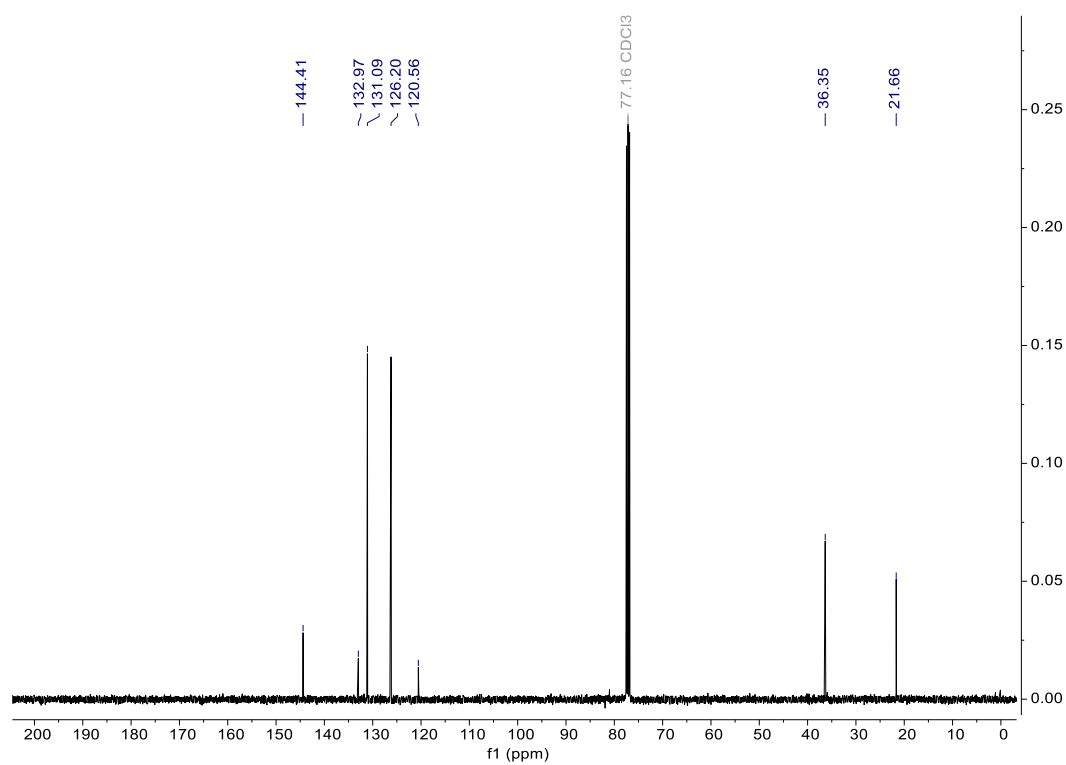

# Data for **4h**

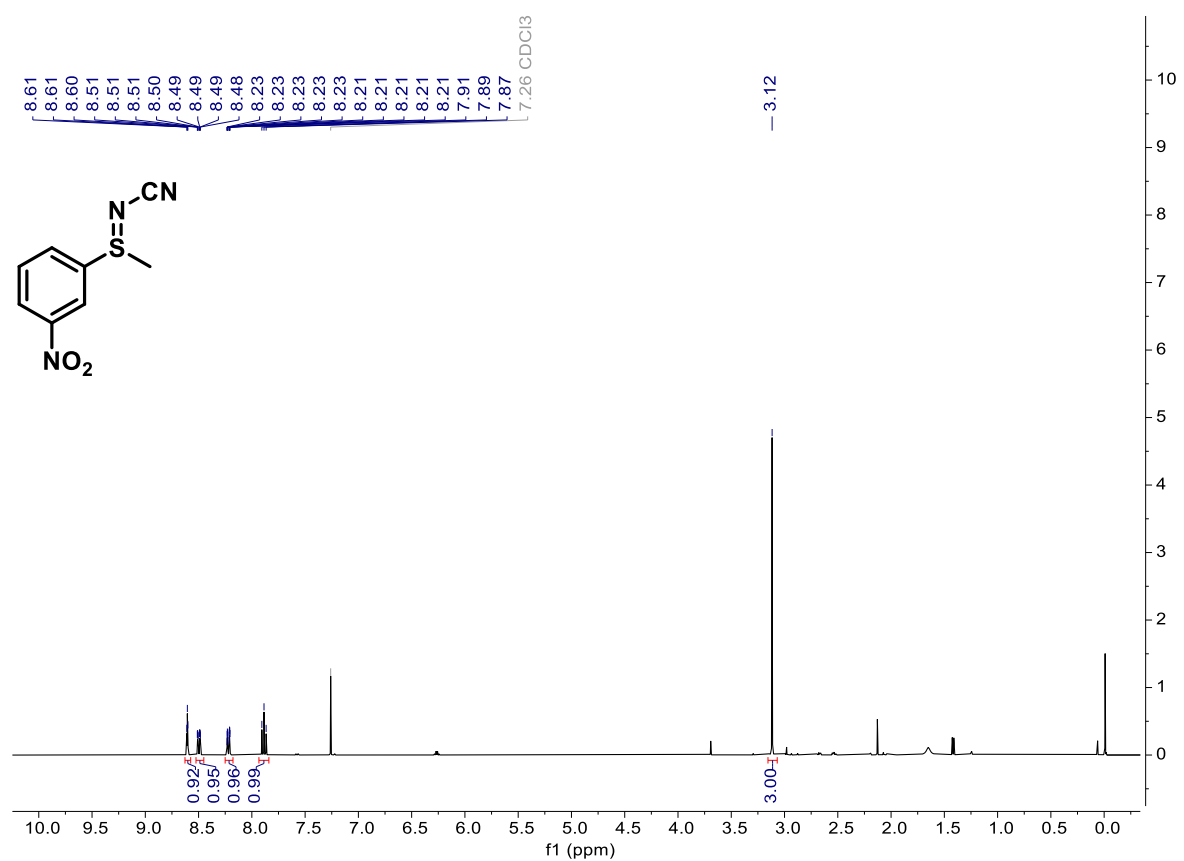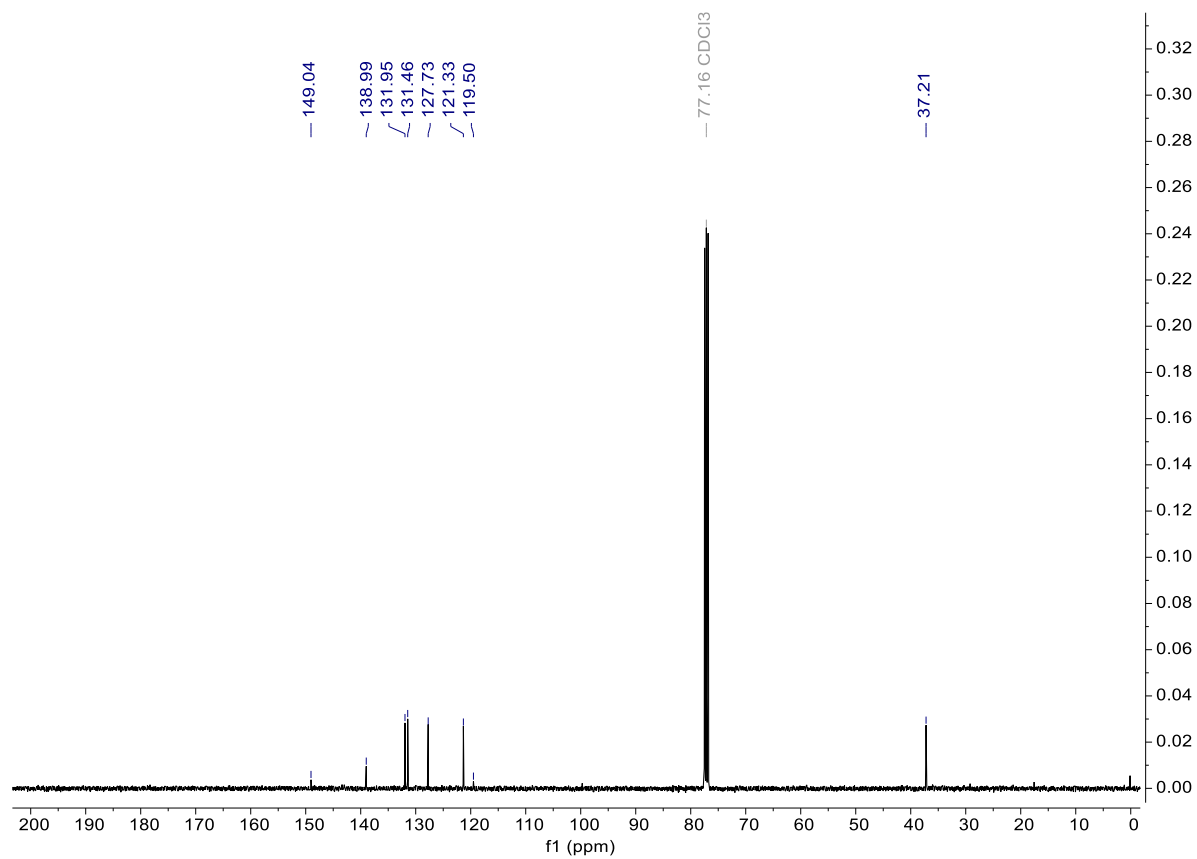

# Data for **4i**

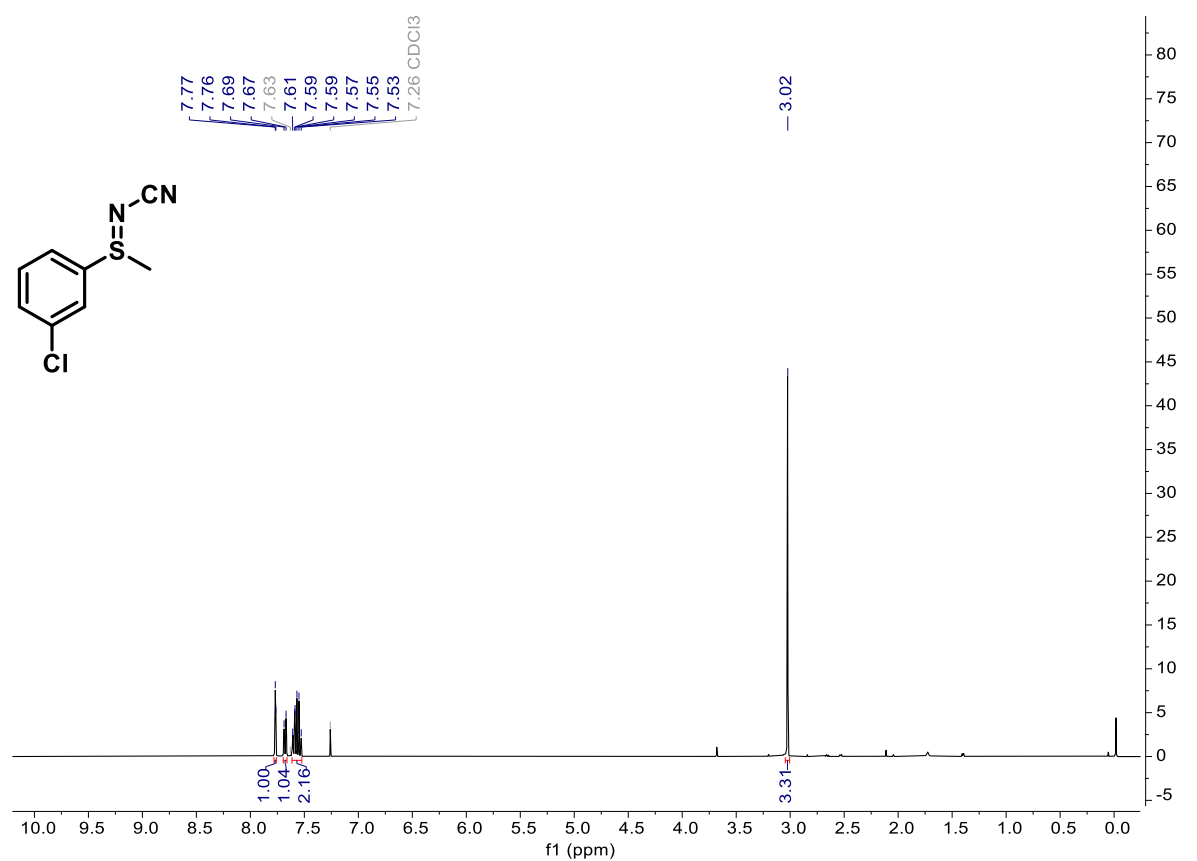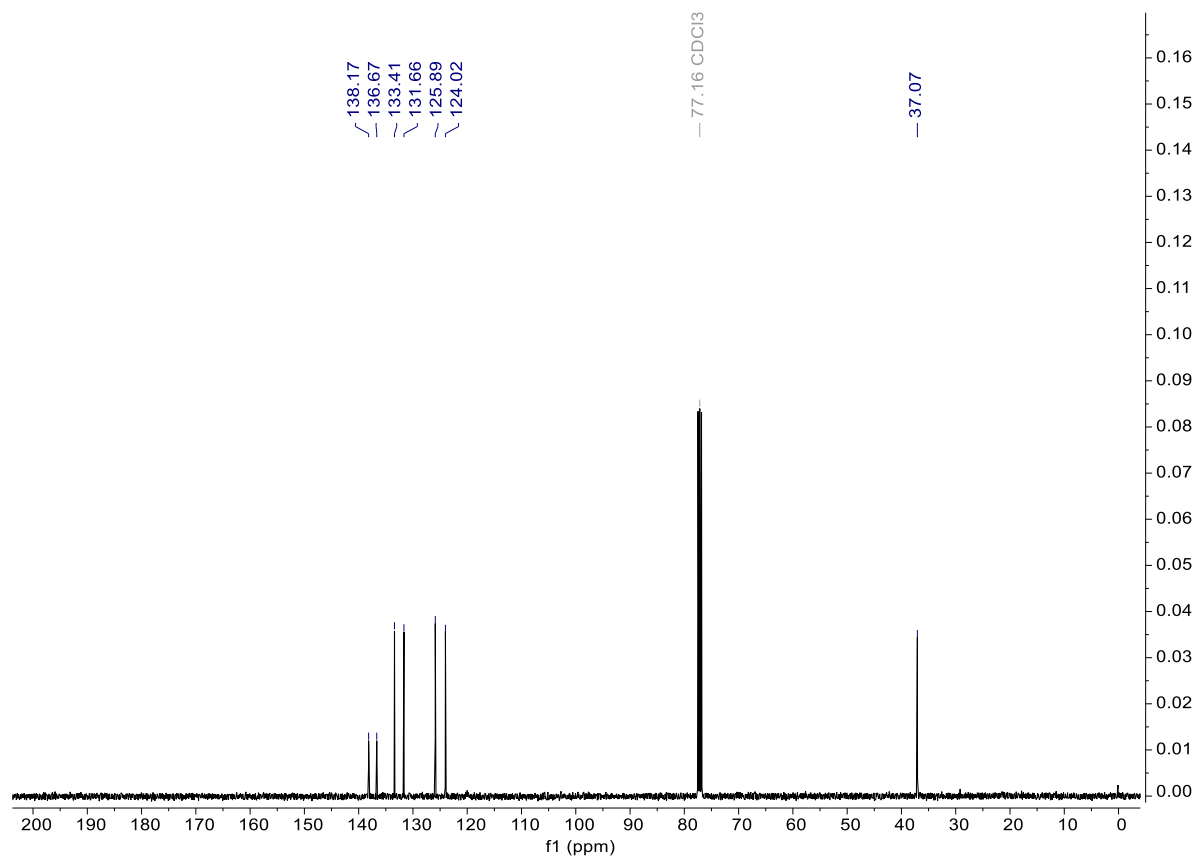

Data for **4j**:

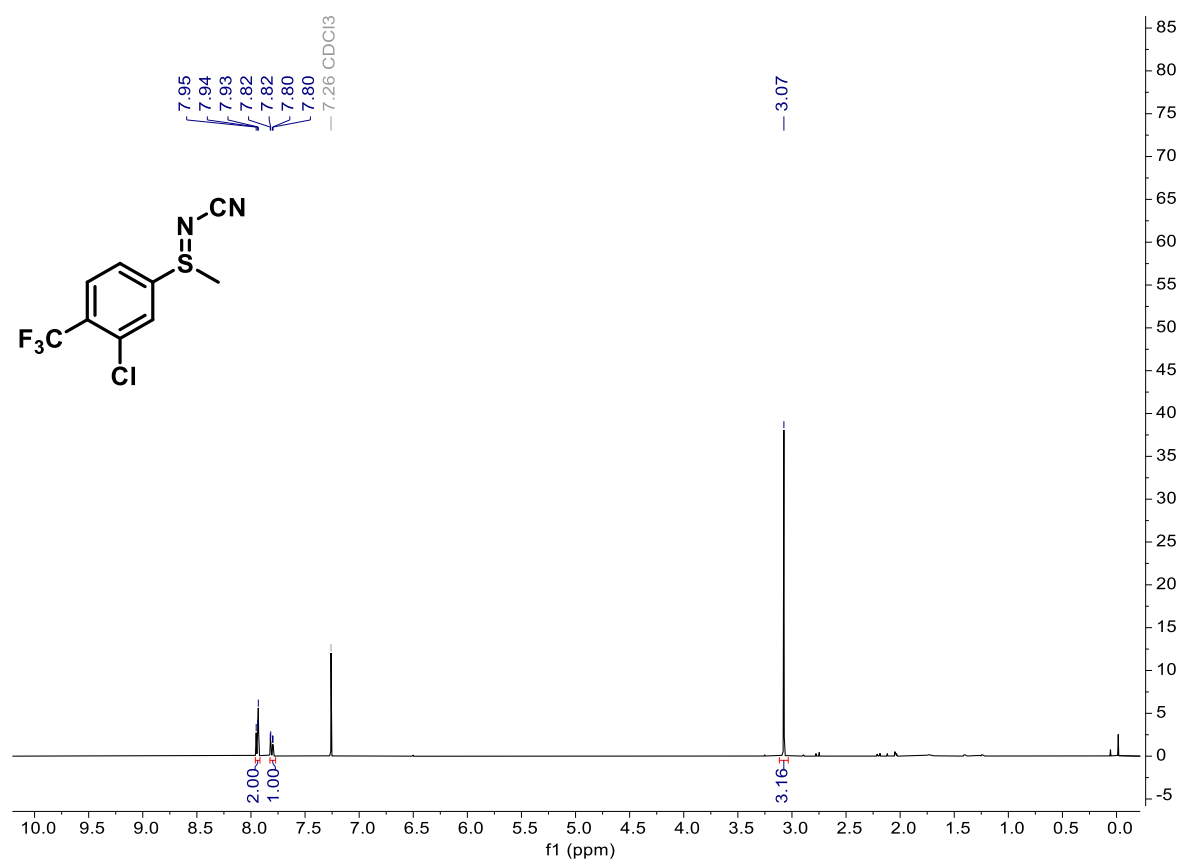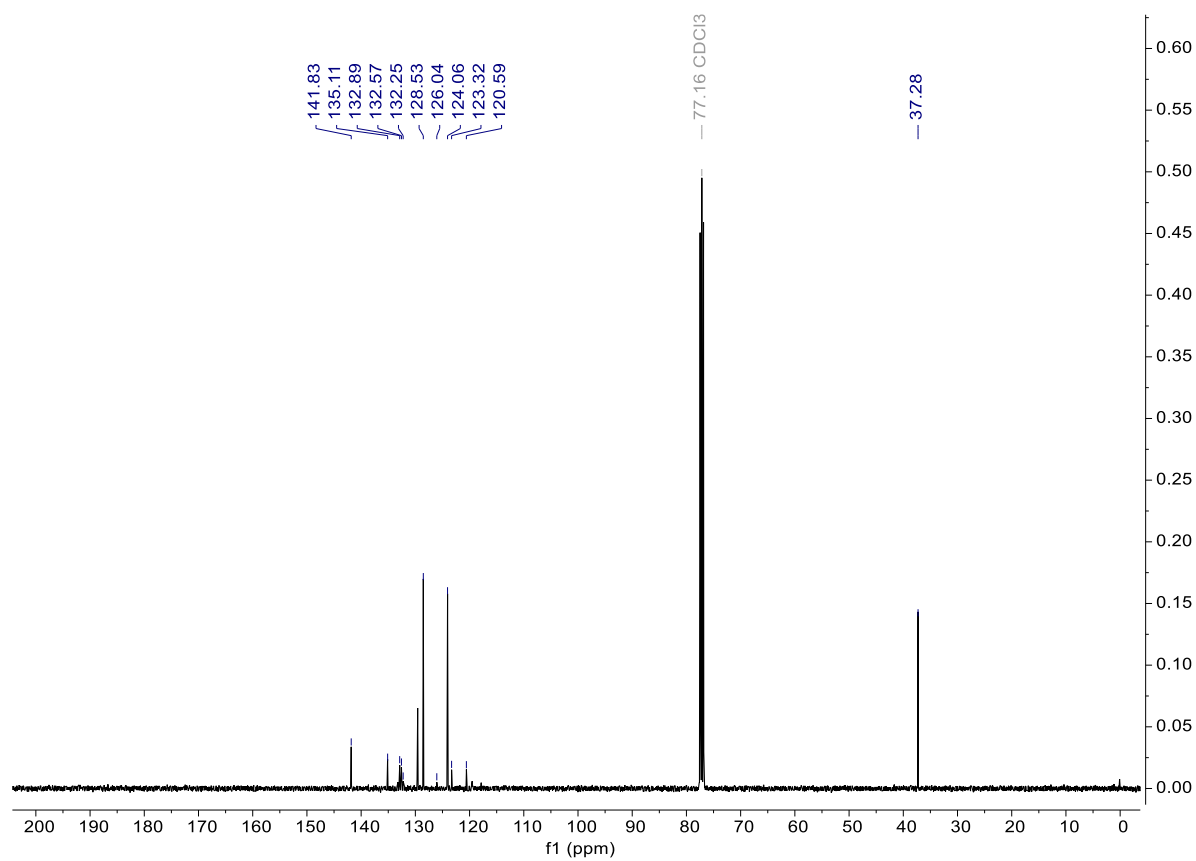

# Data for **4k**

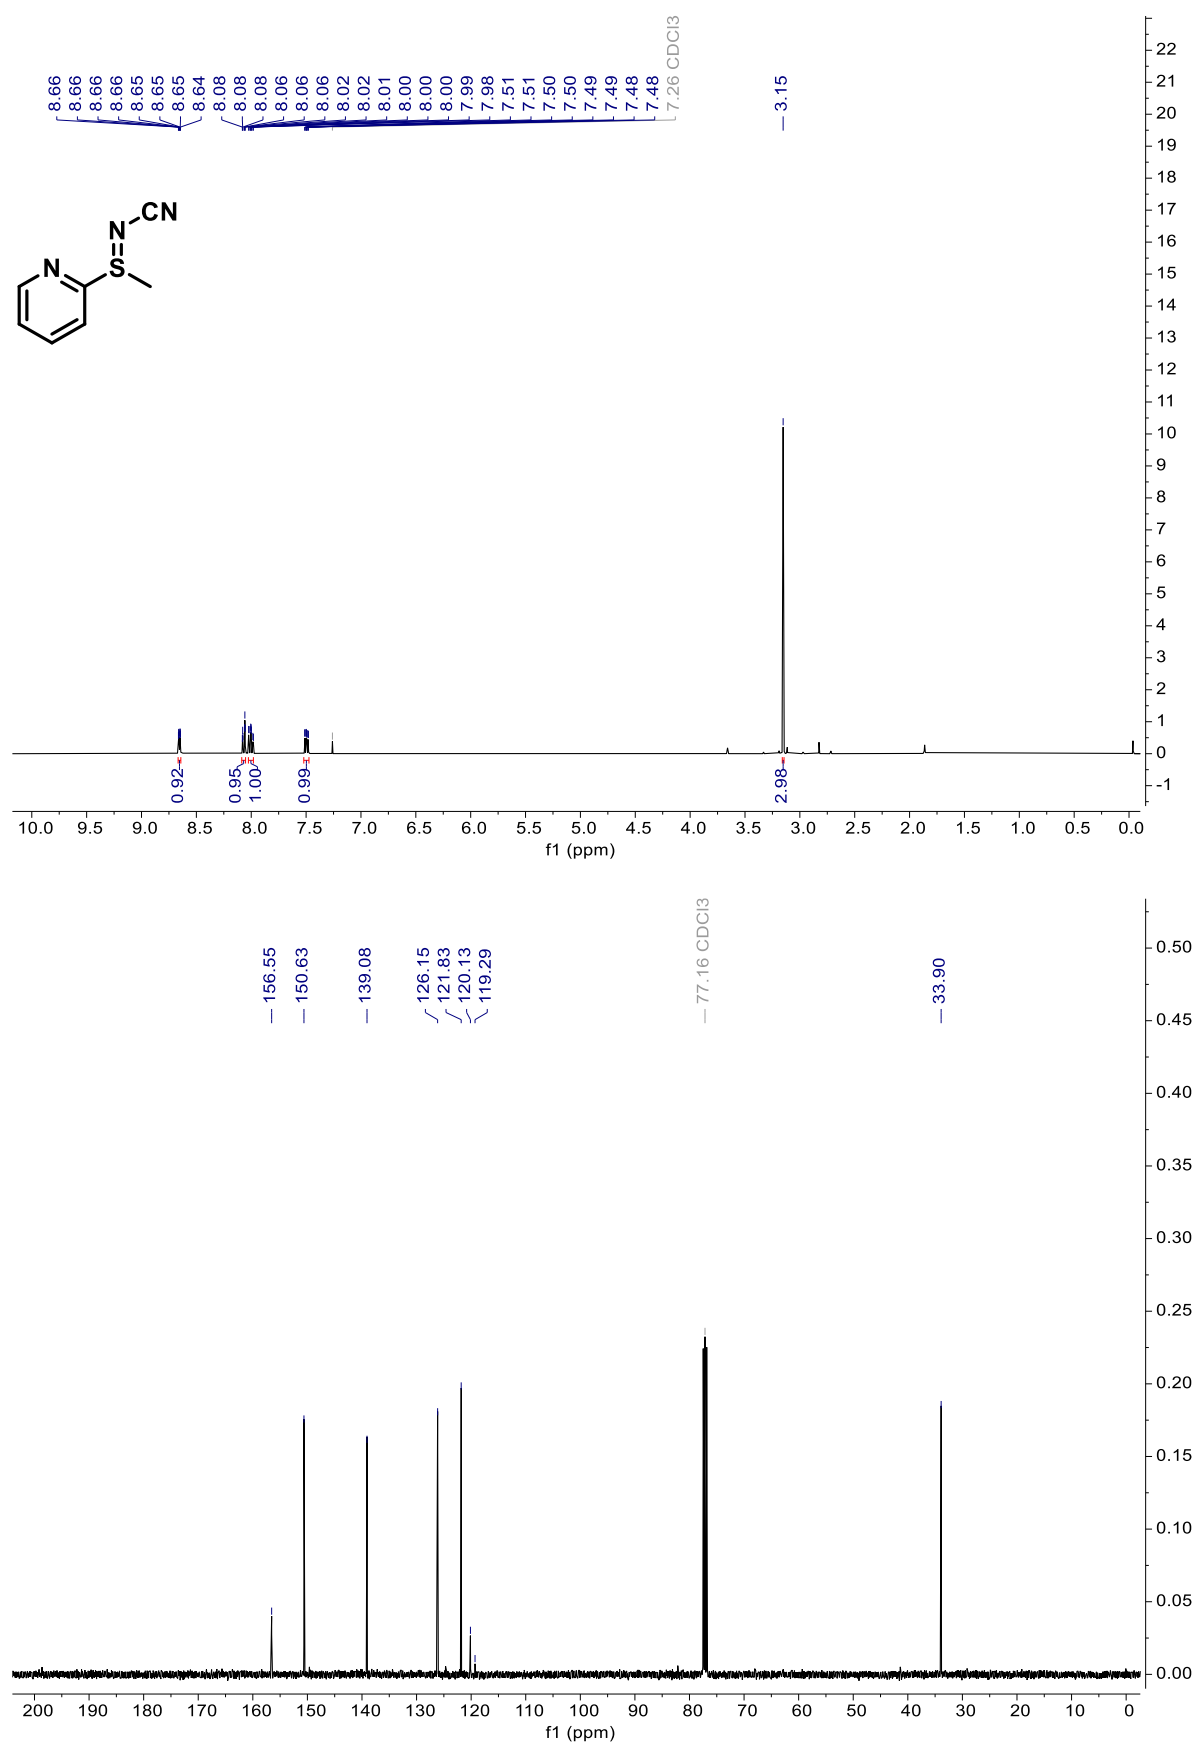

# Data for **4I**

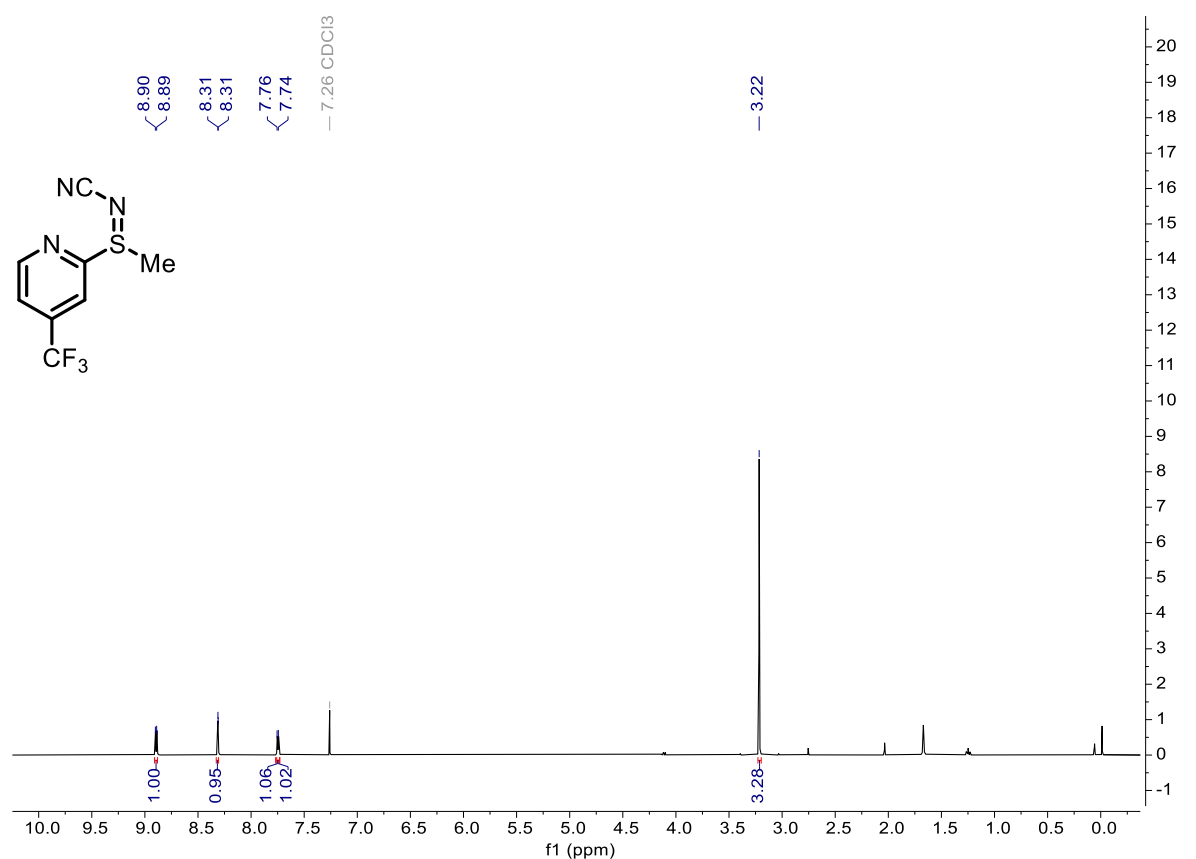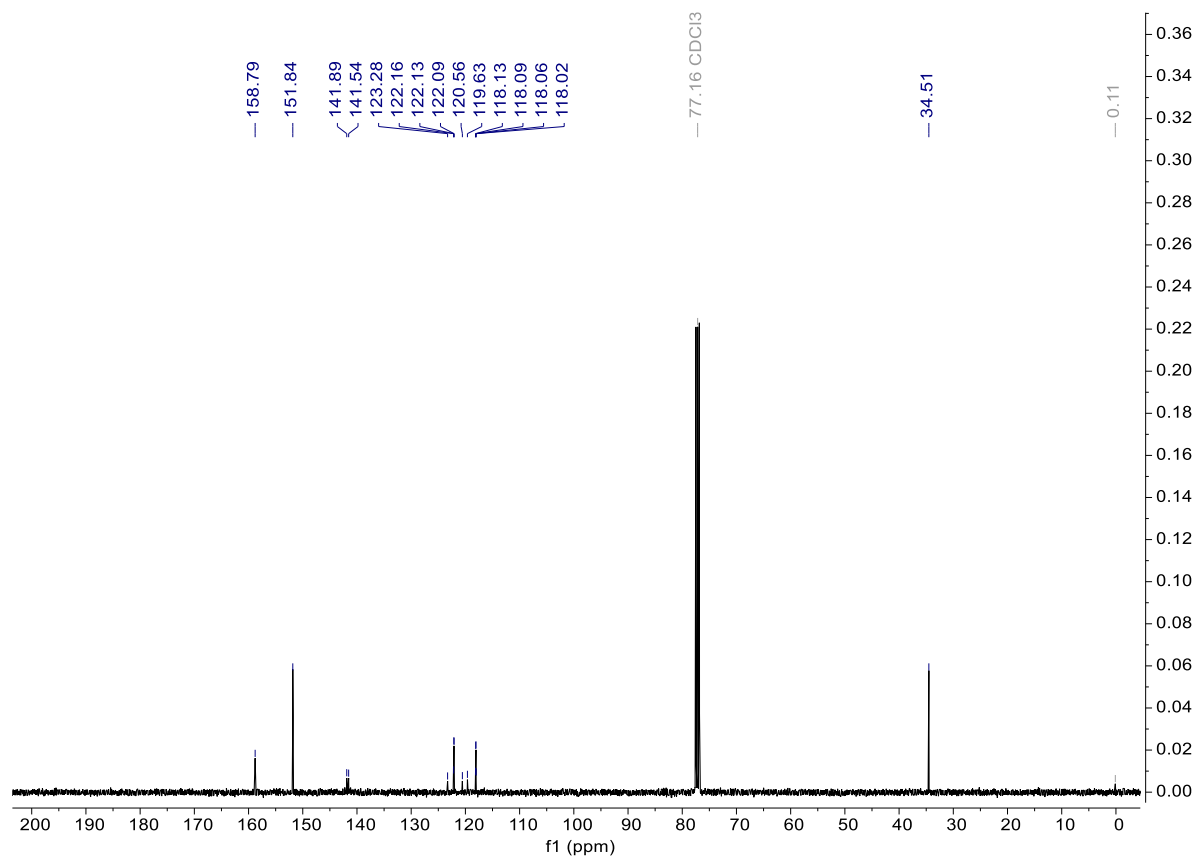

# Data for **4m**

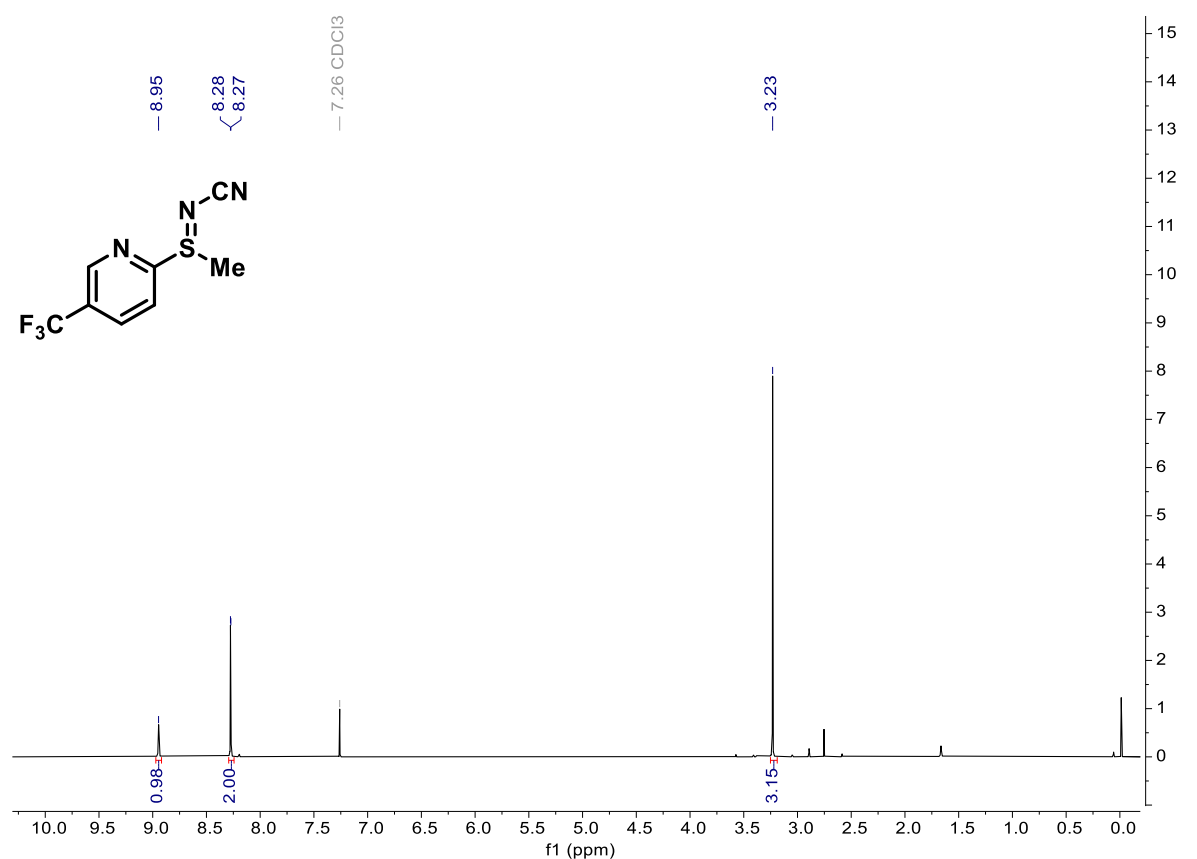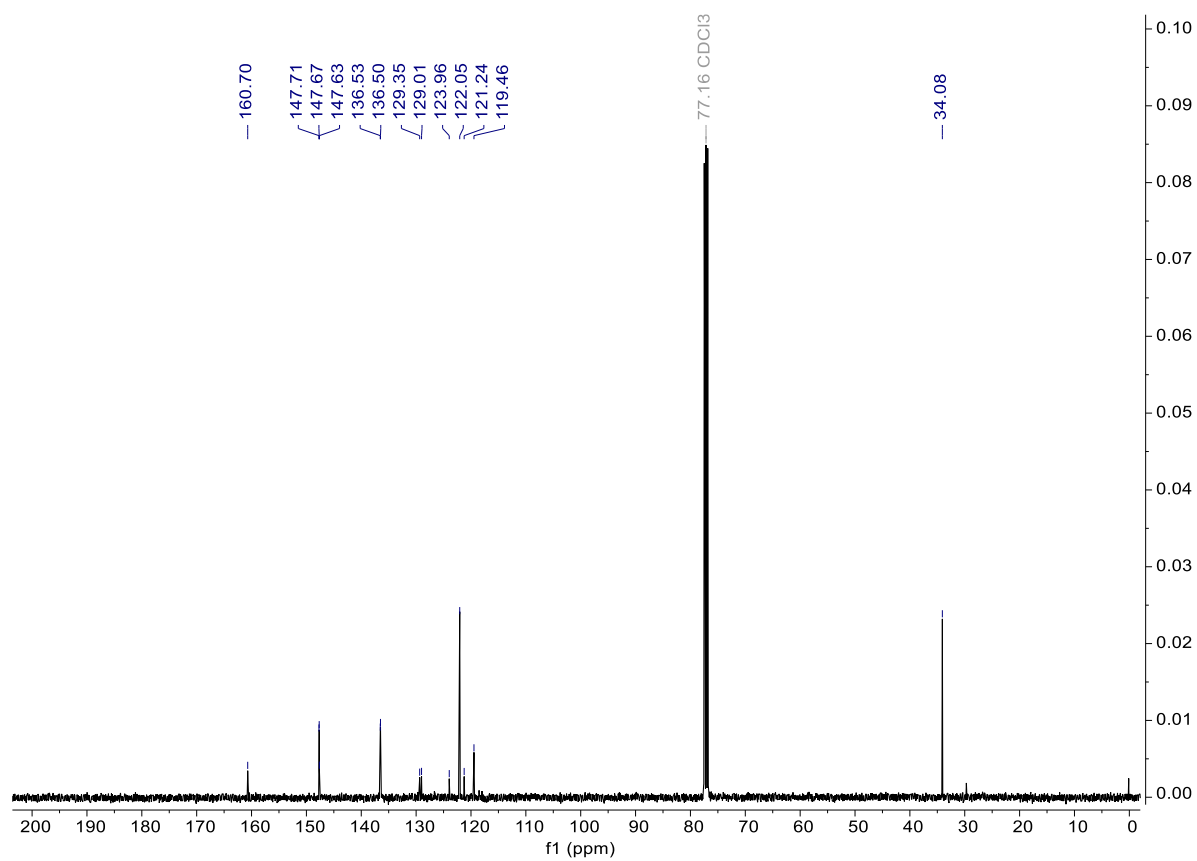

# Data for **4n**

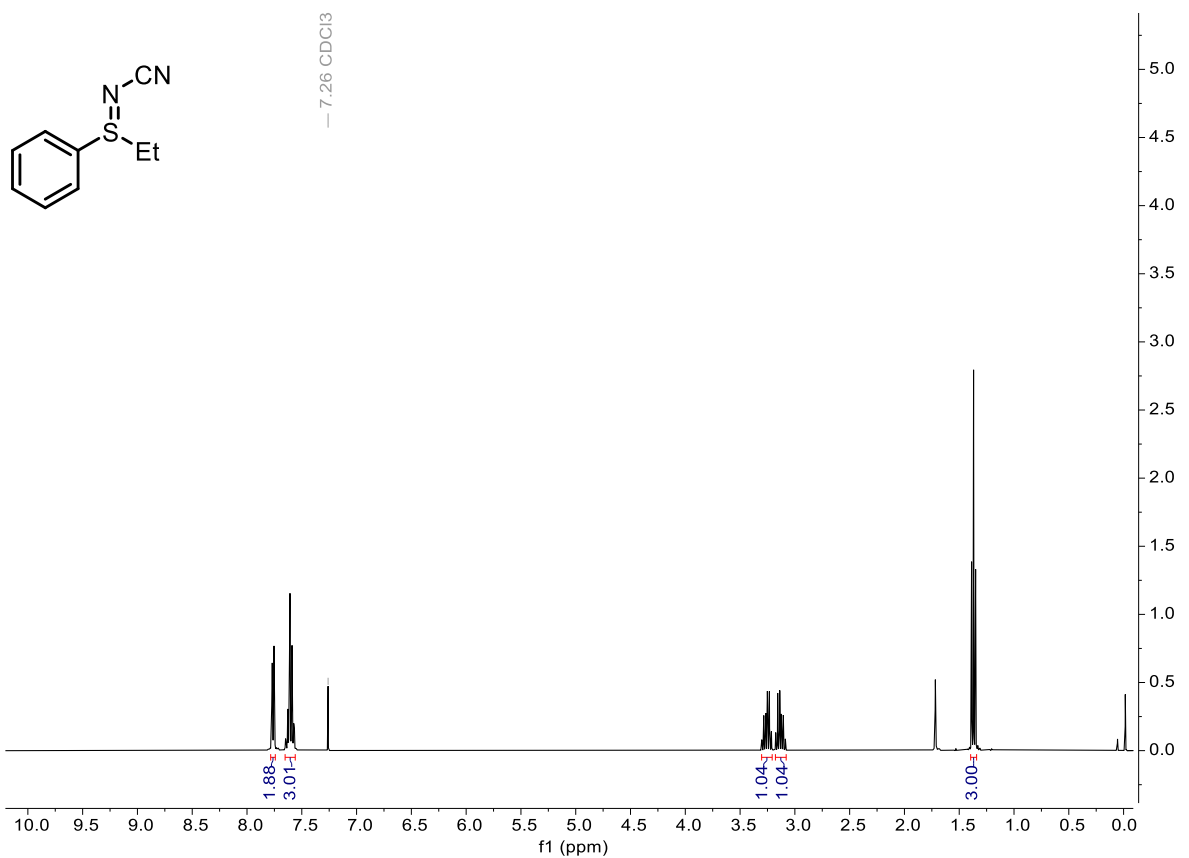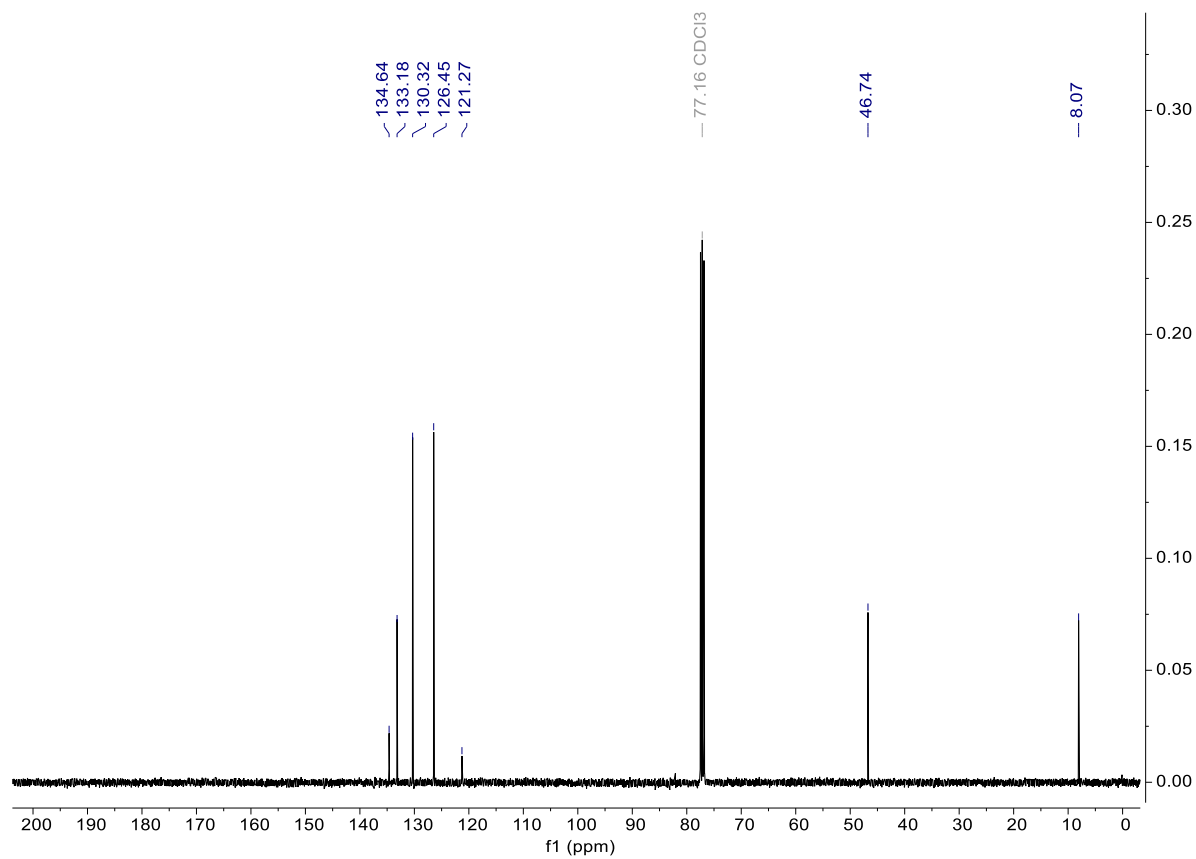



# Data for **4o**

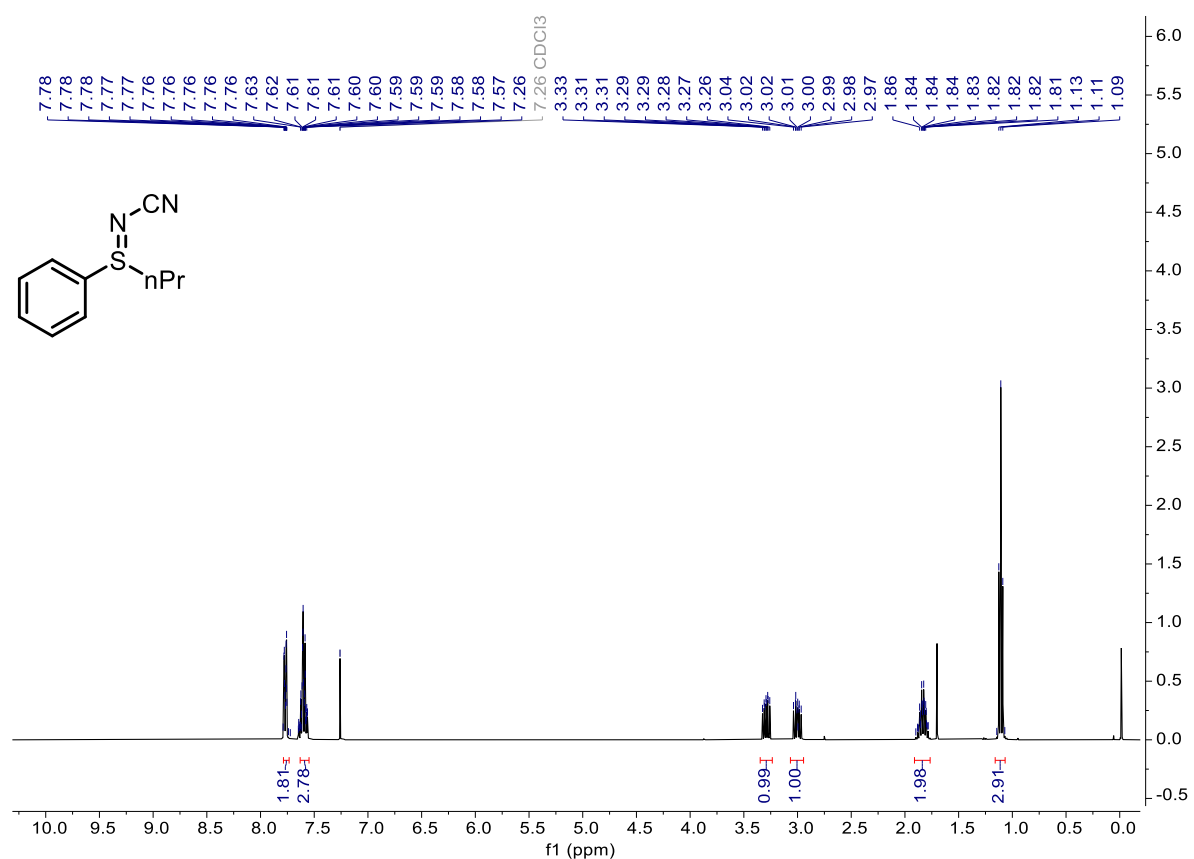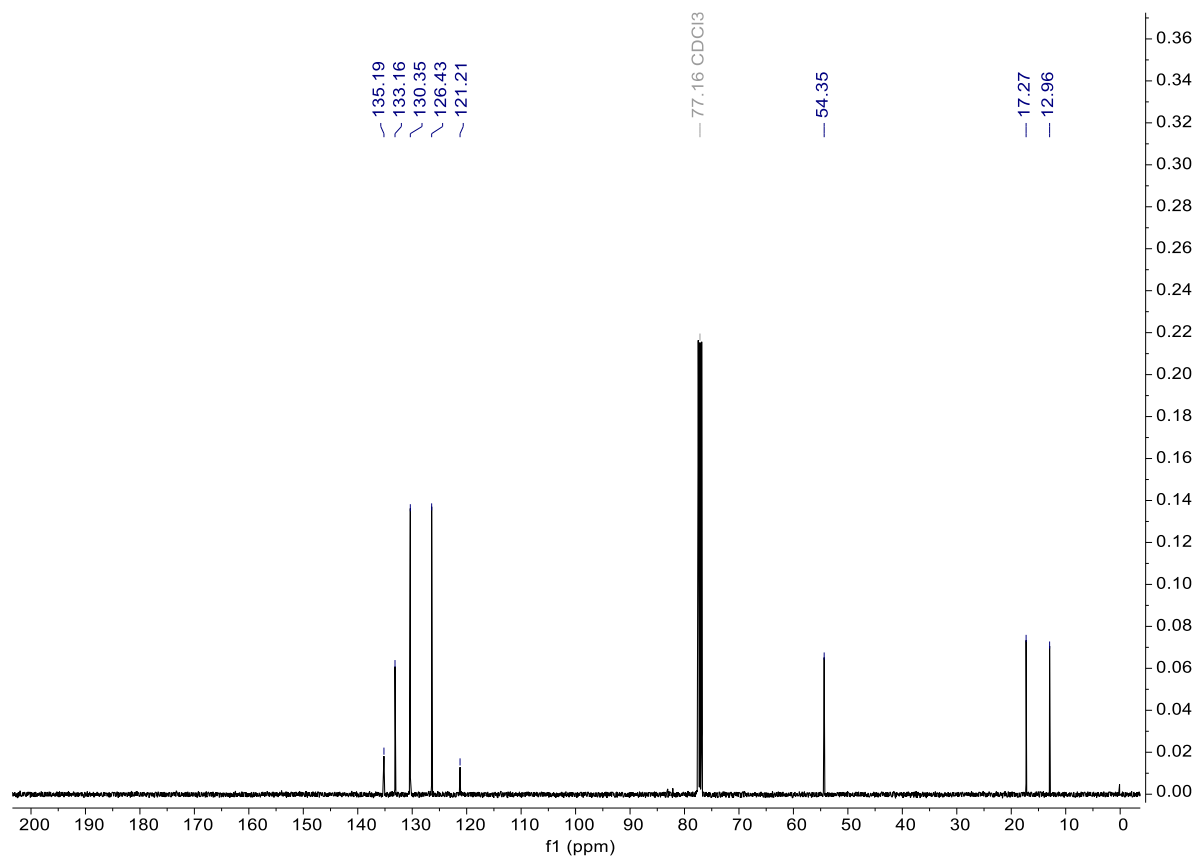

# Data for **4p**

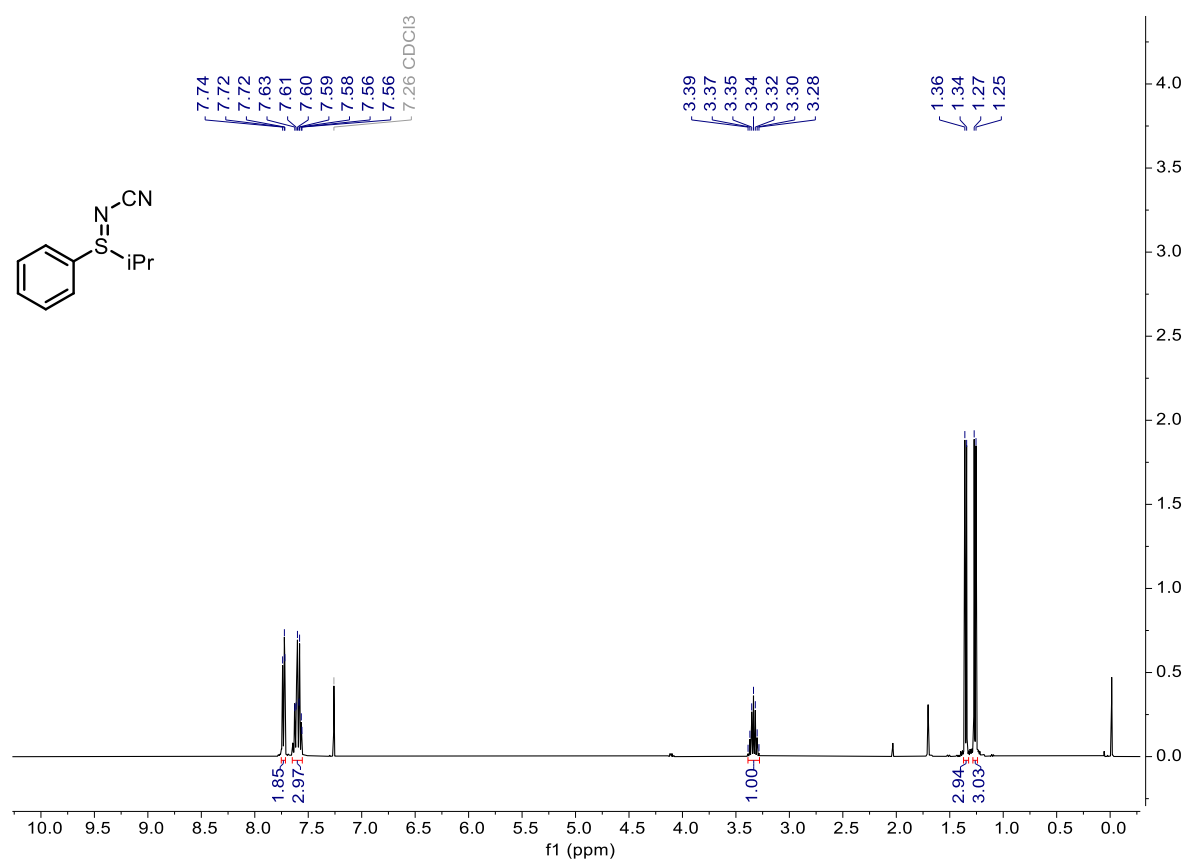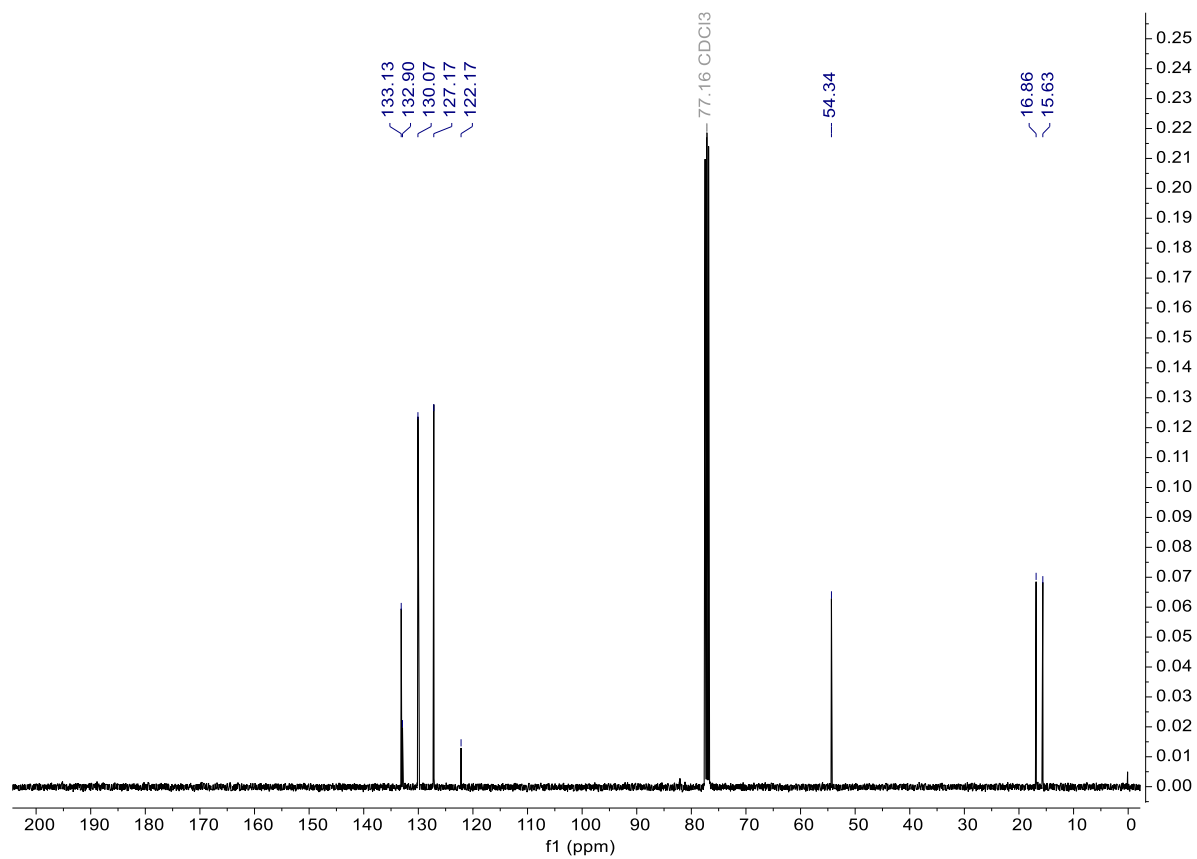

# Data for **4q**

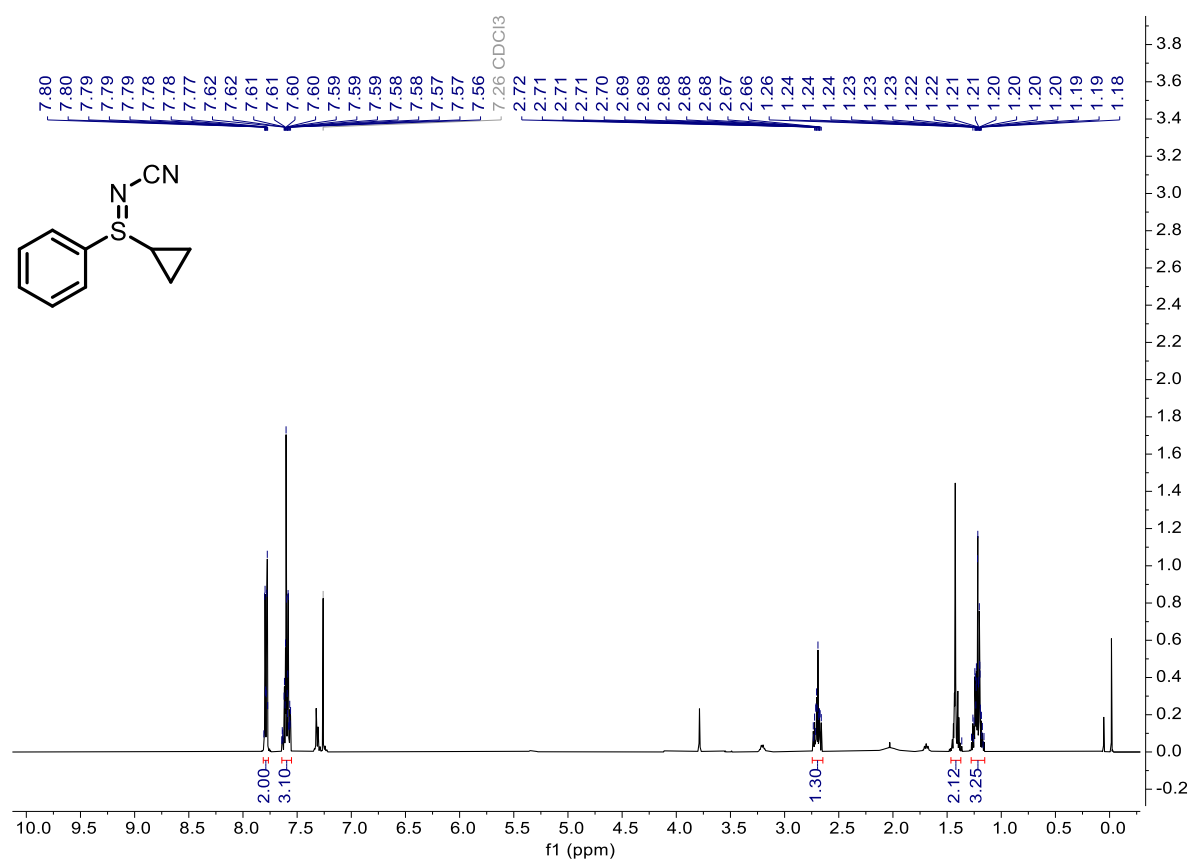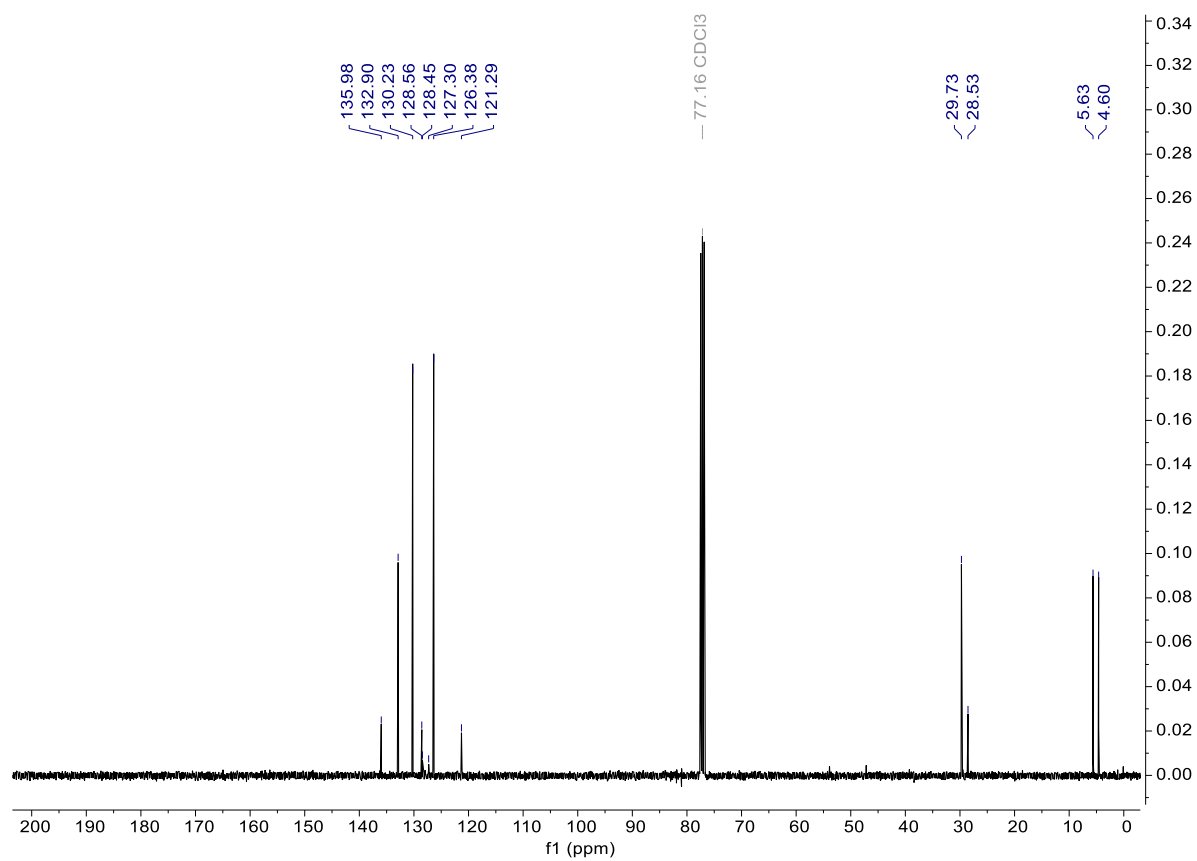

# Data for **4r**

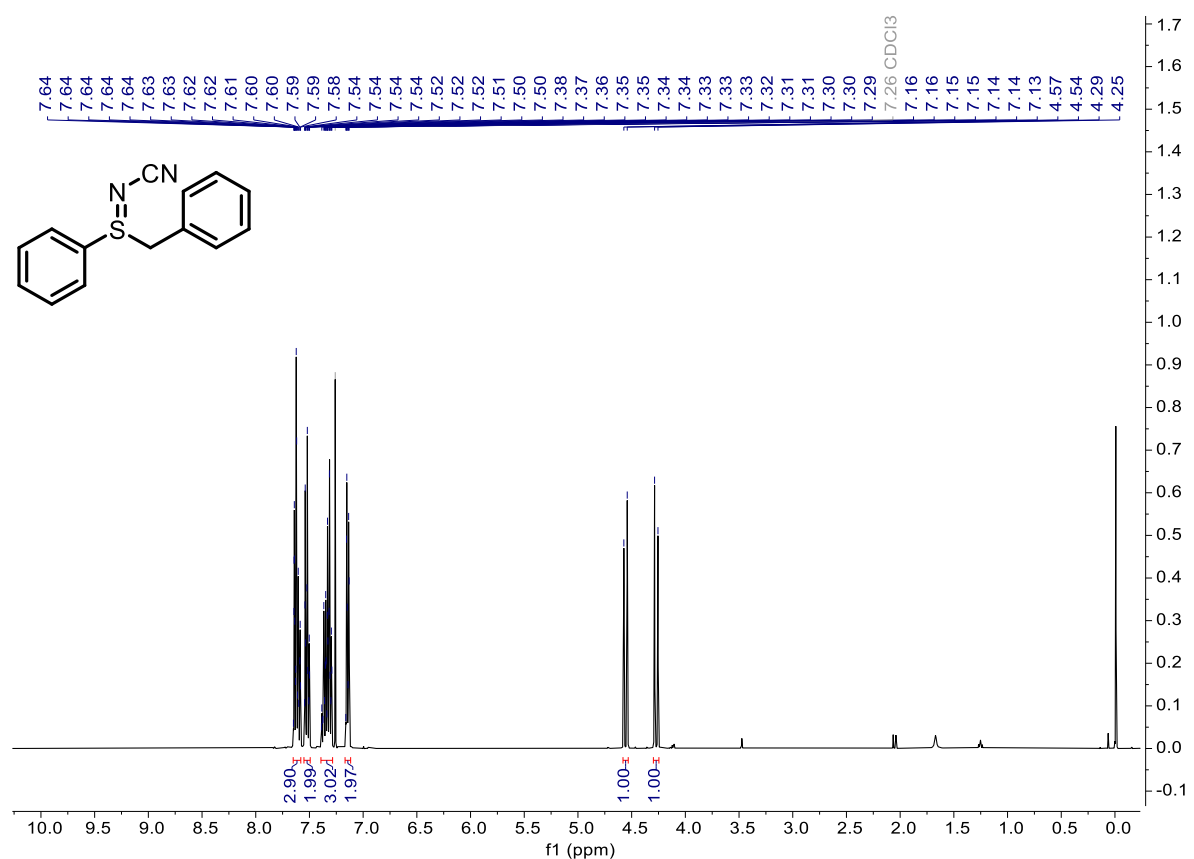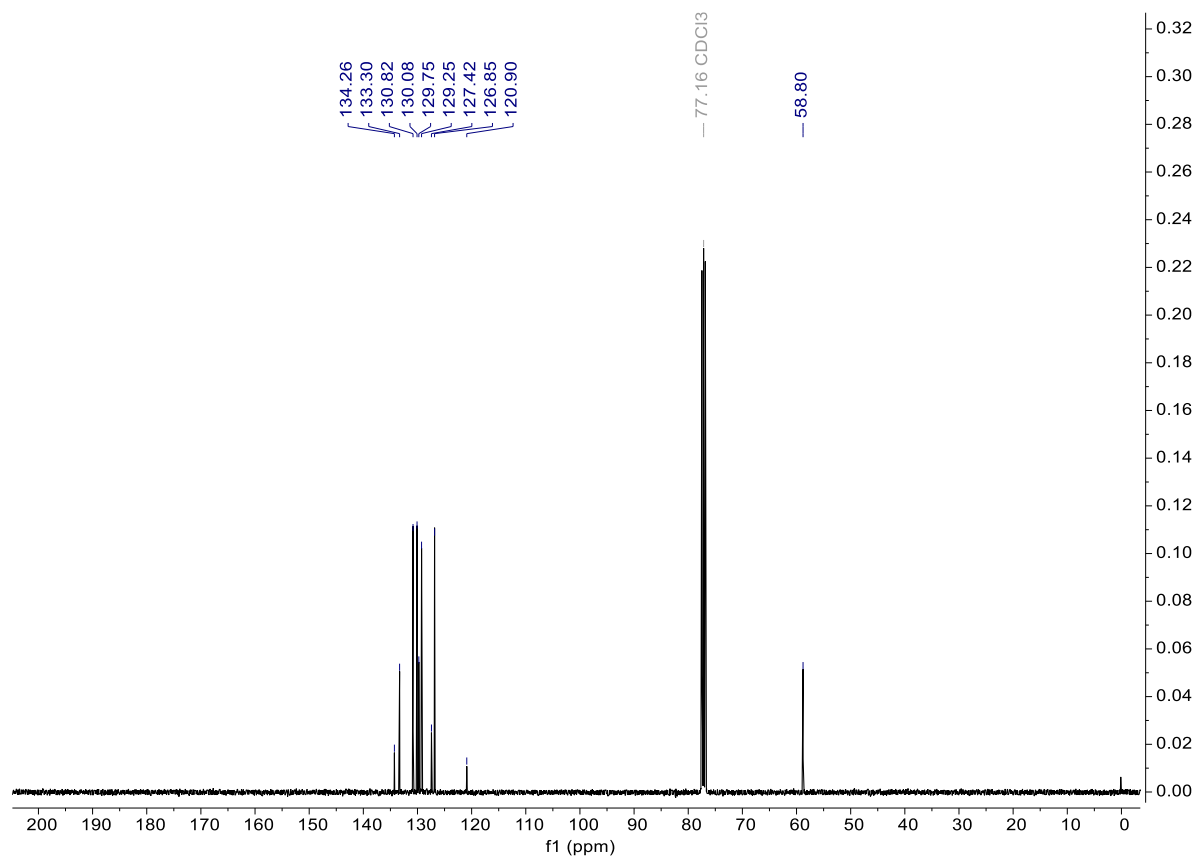

# Data for **4s**

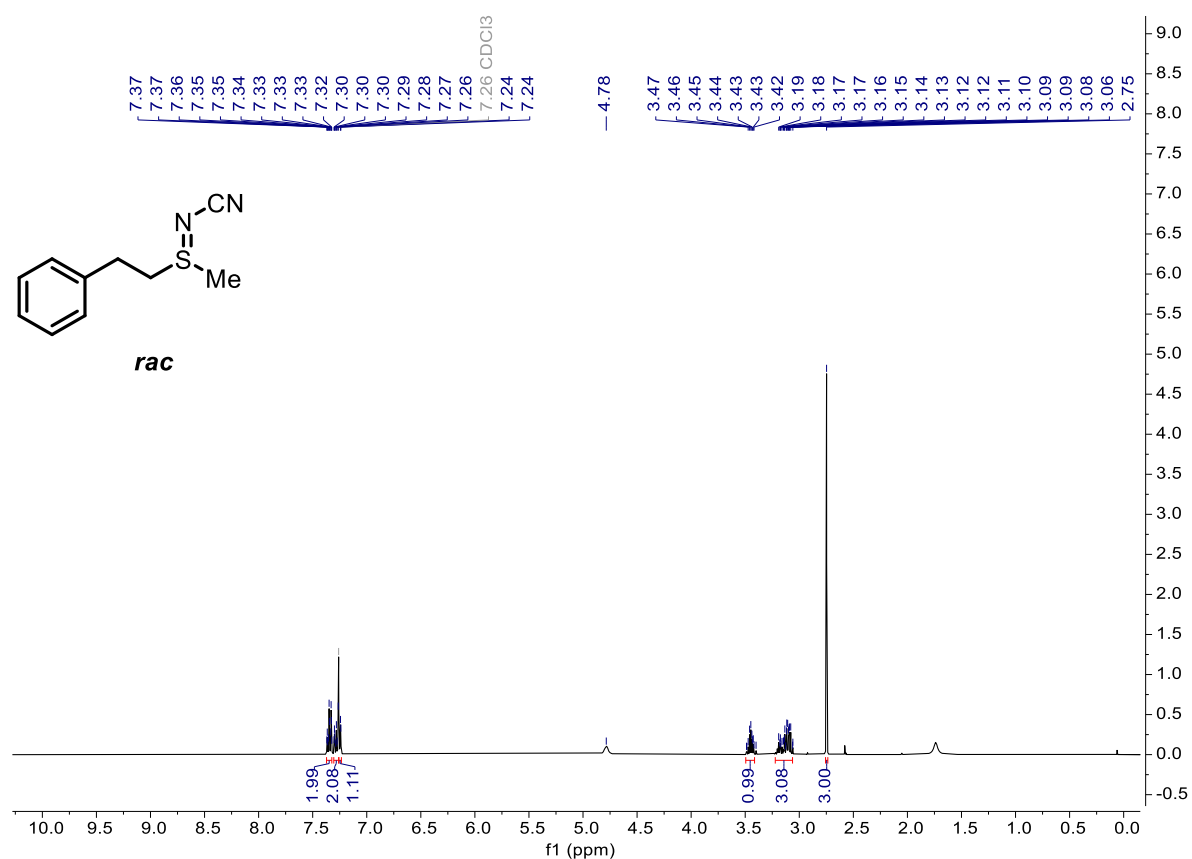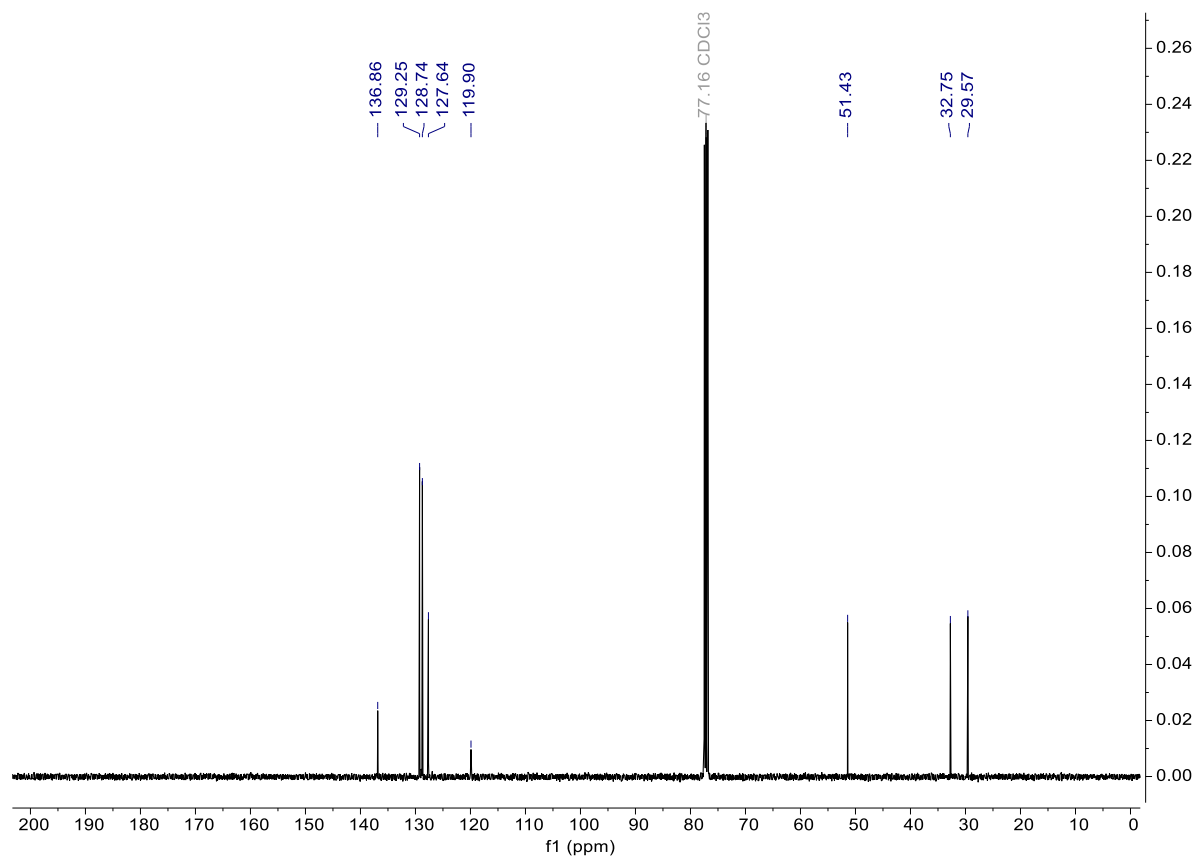

# Data for **4t**

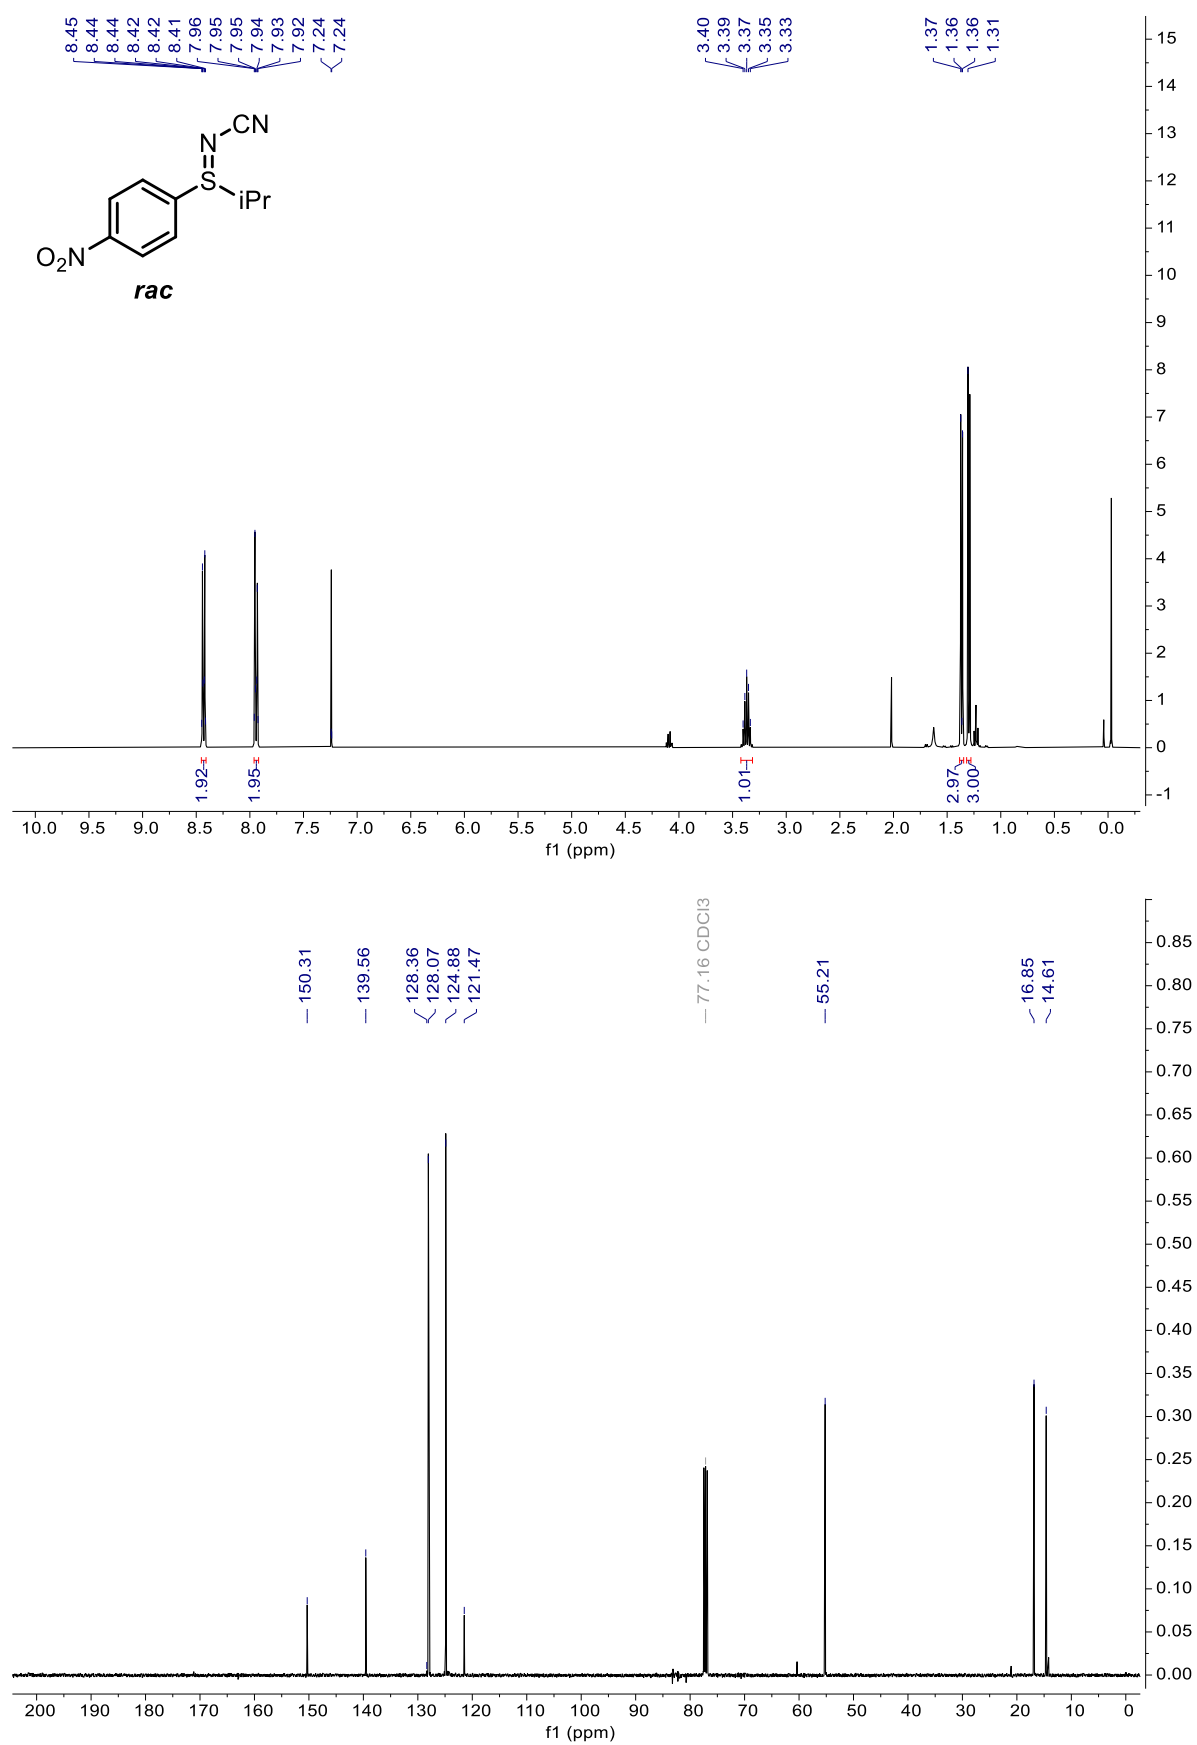

# Data for **4u**

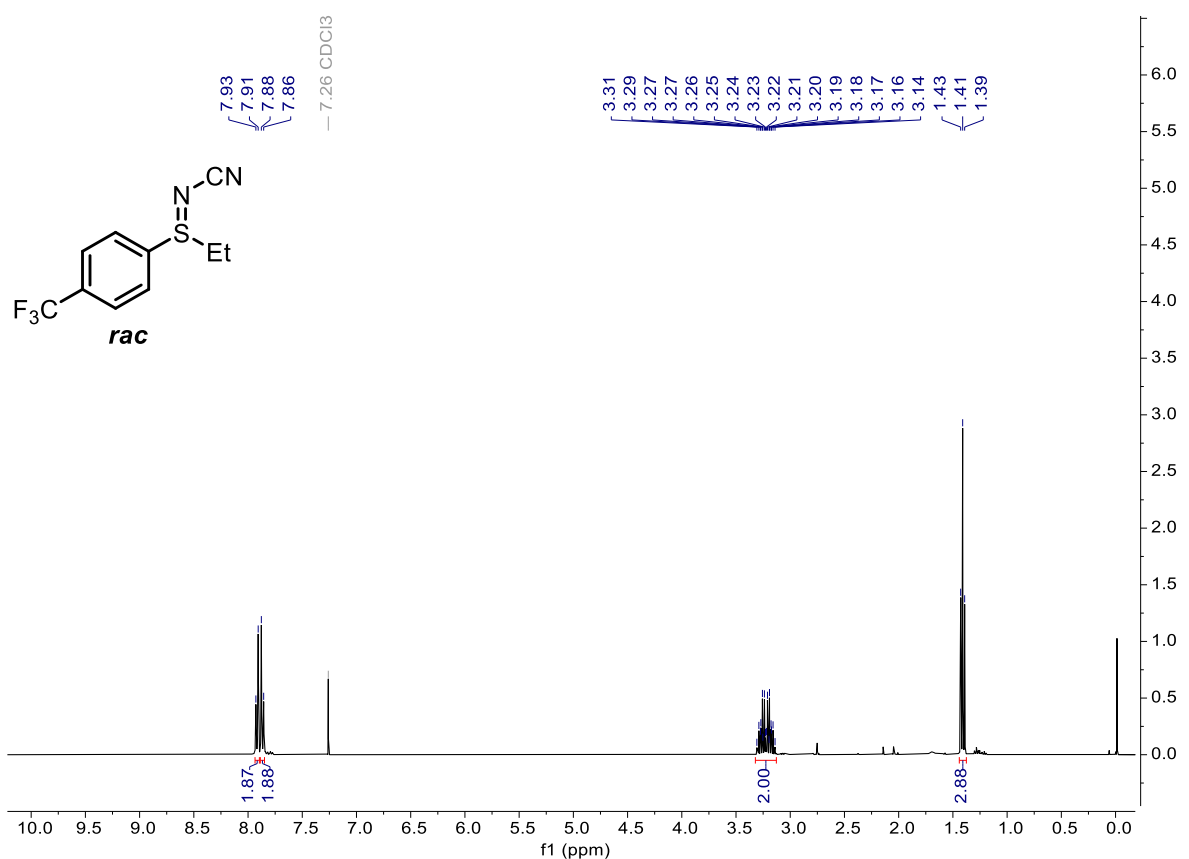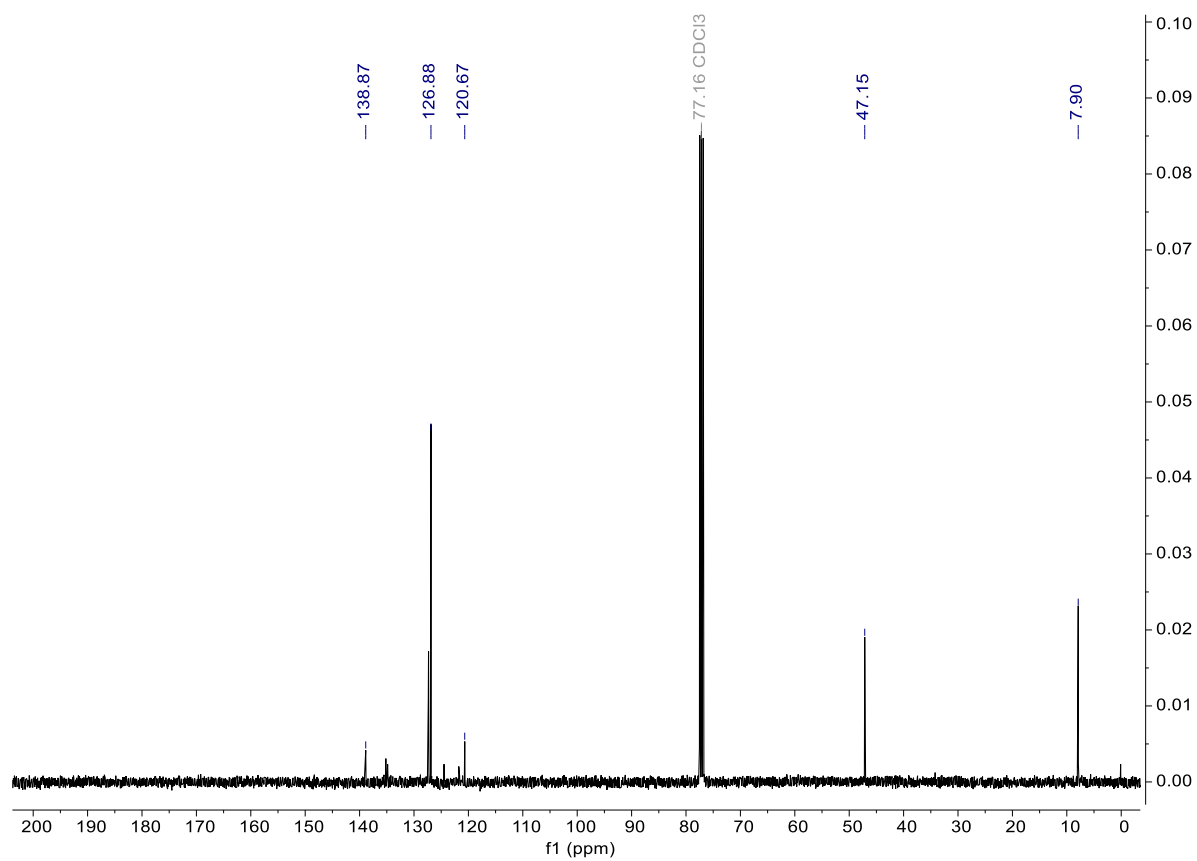

# Data for **5a**

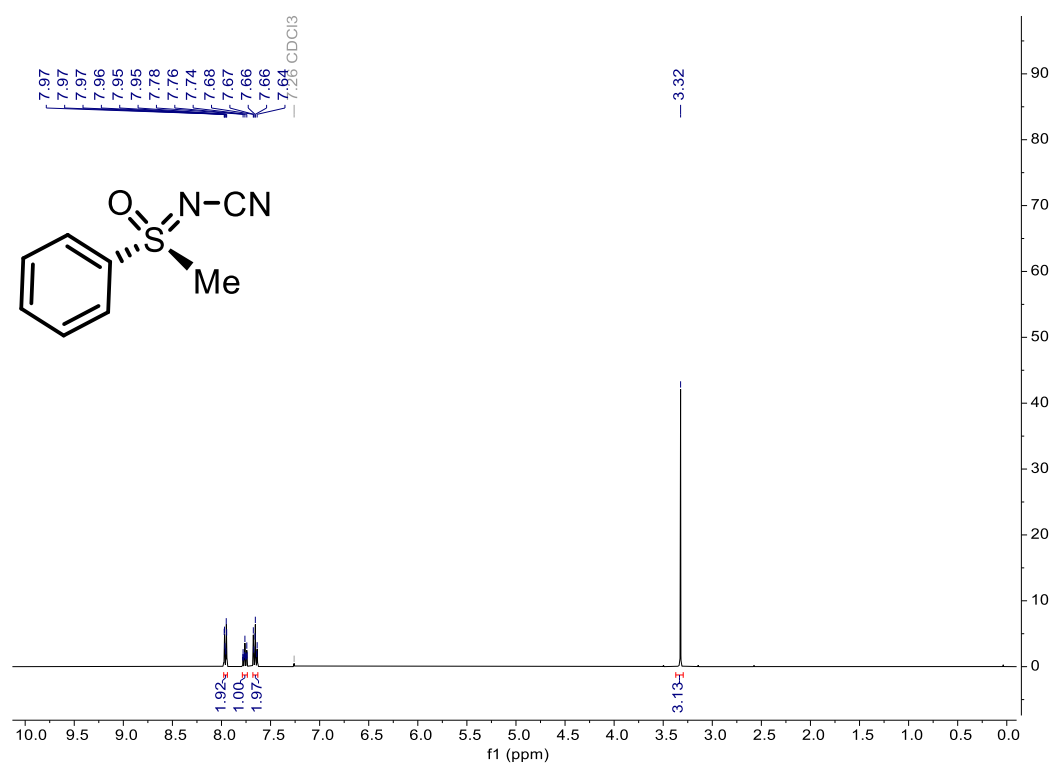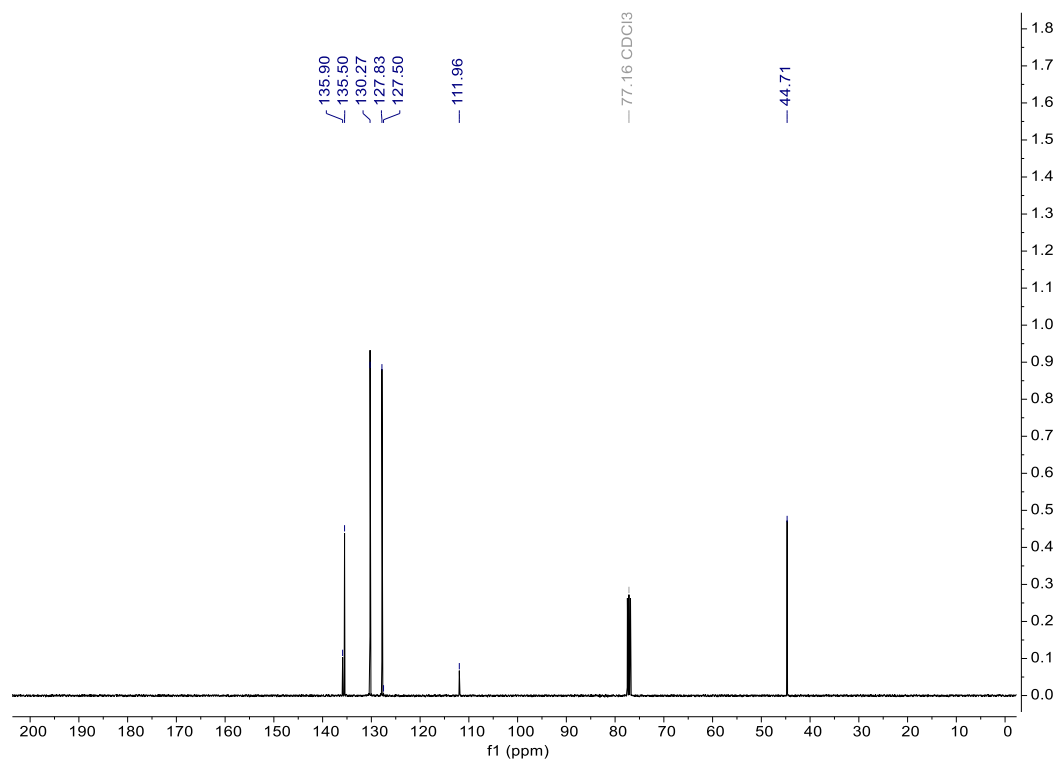



# Data for **5b**

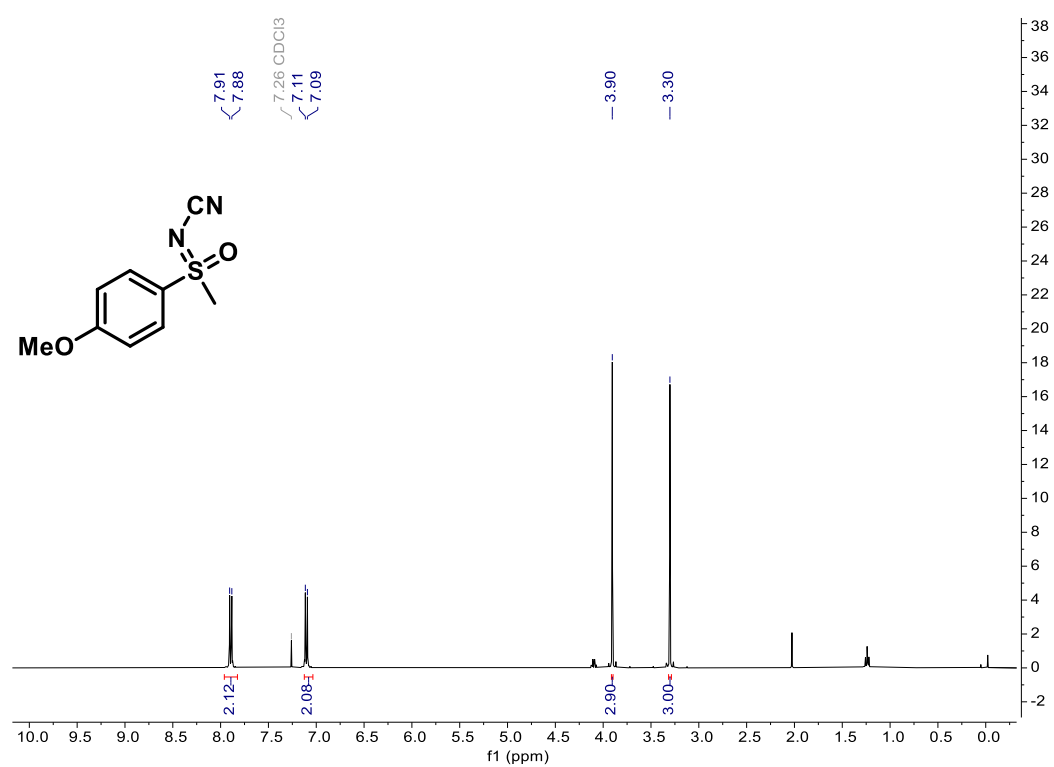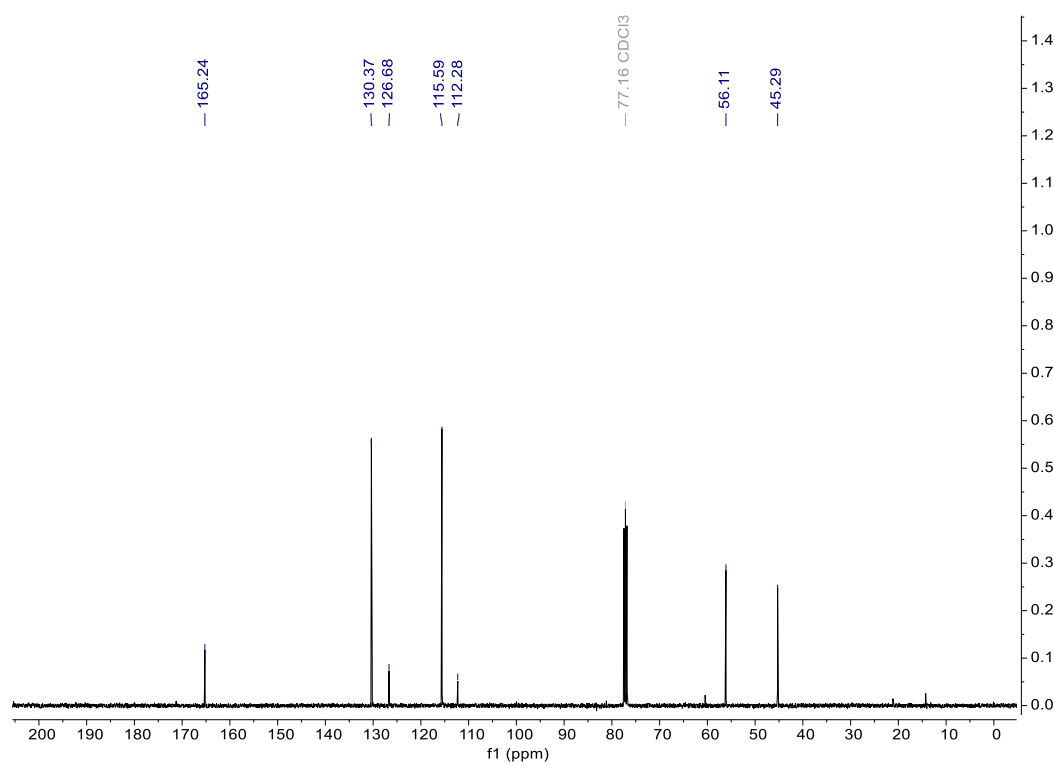

Data for **5c**

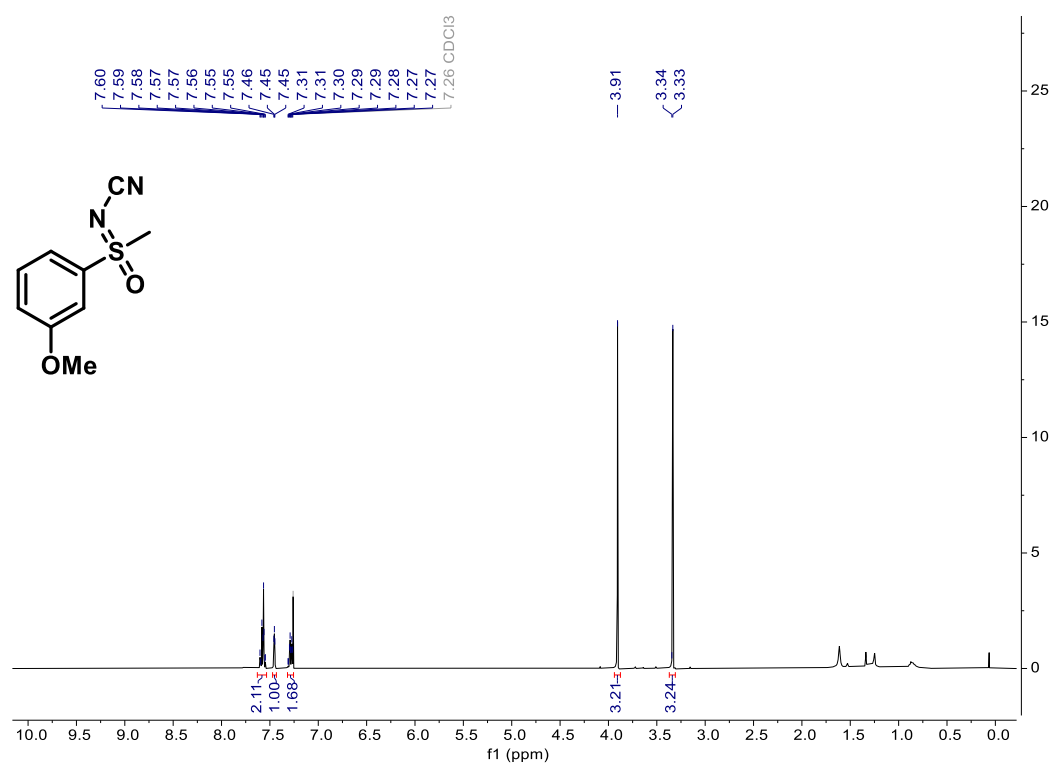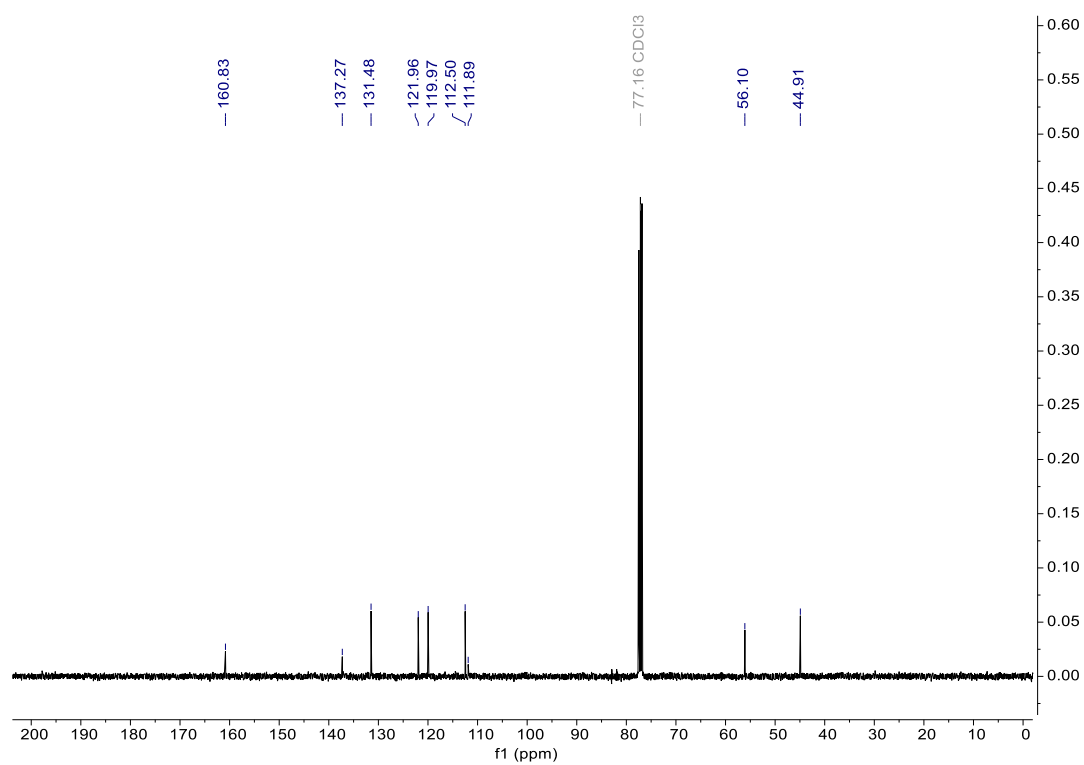

# Data for **5d**

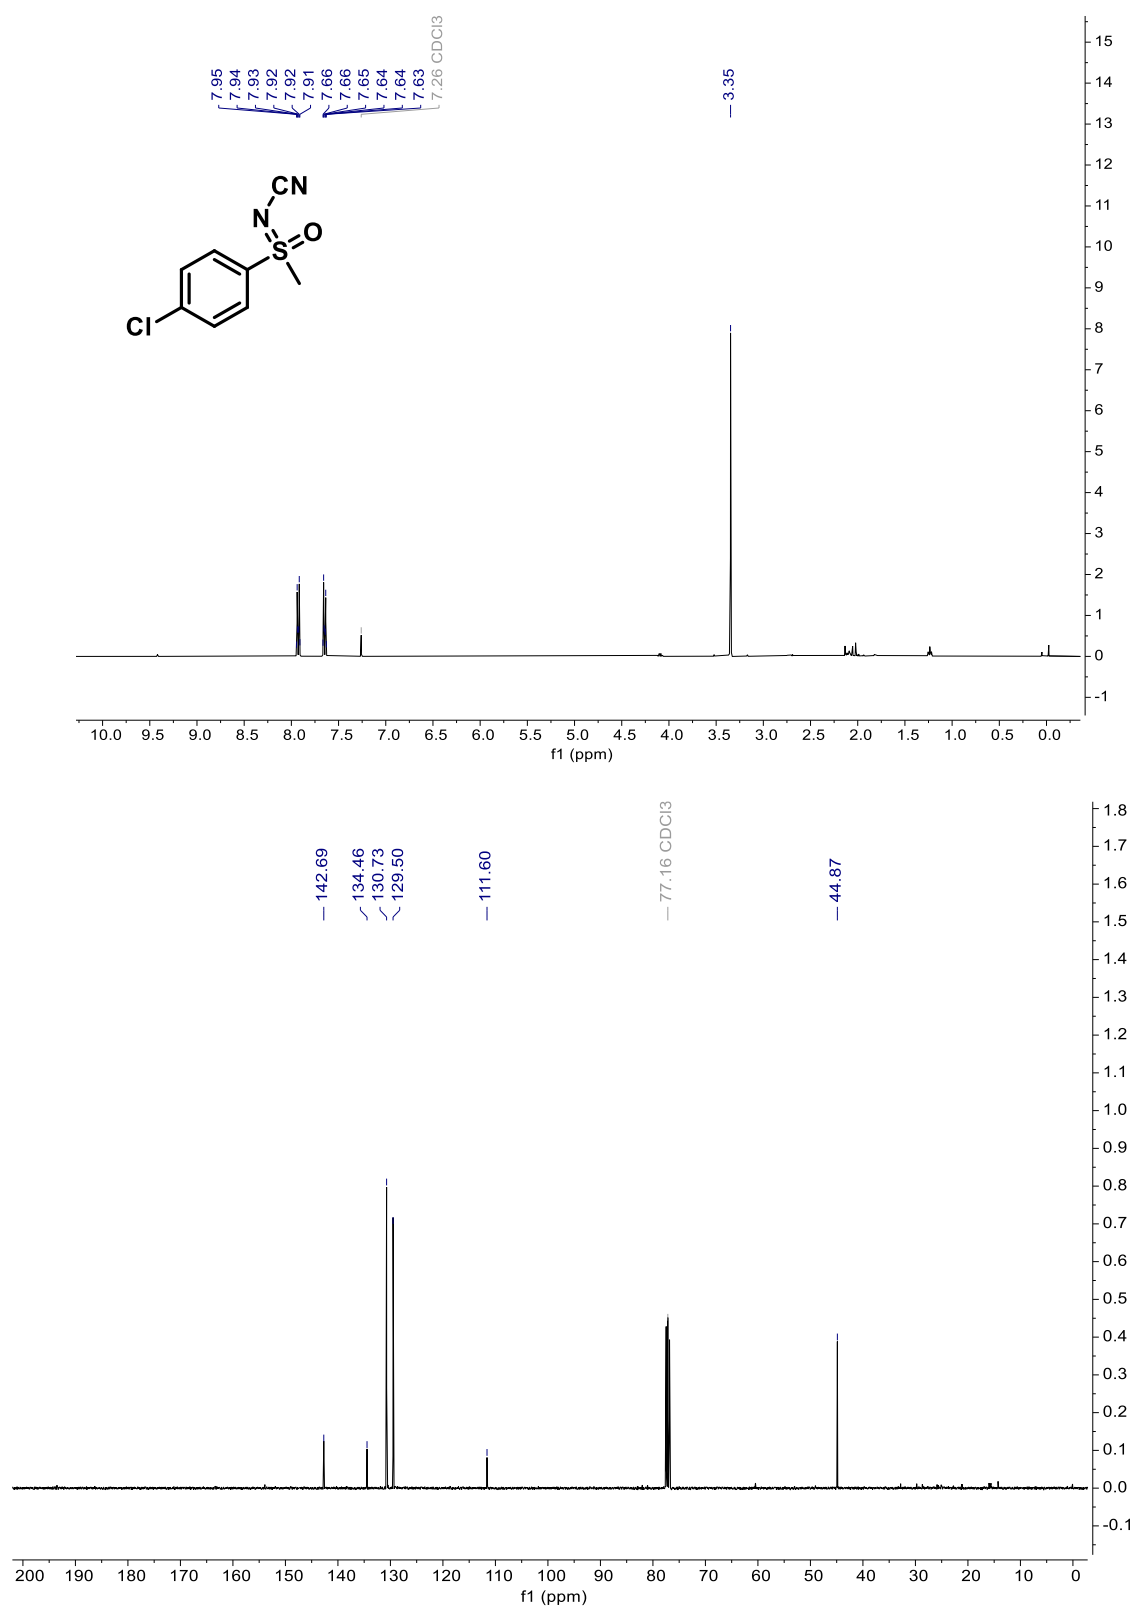

Data for **5e**

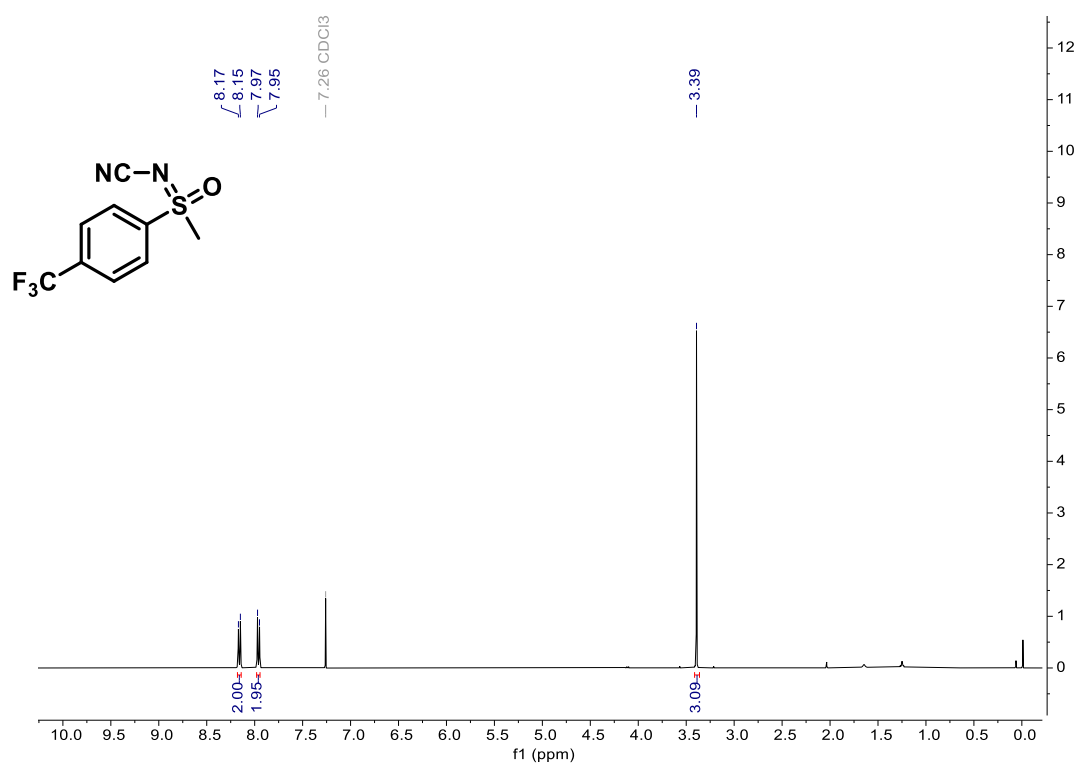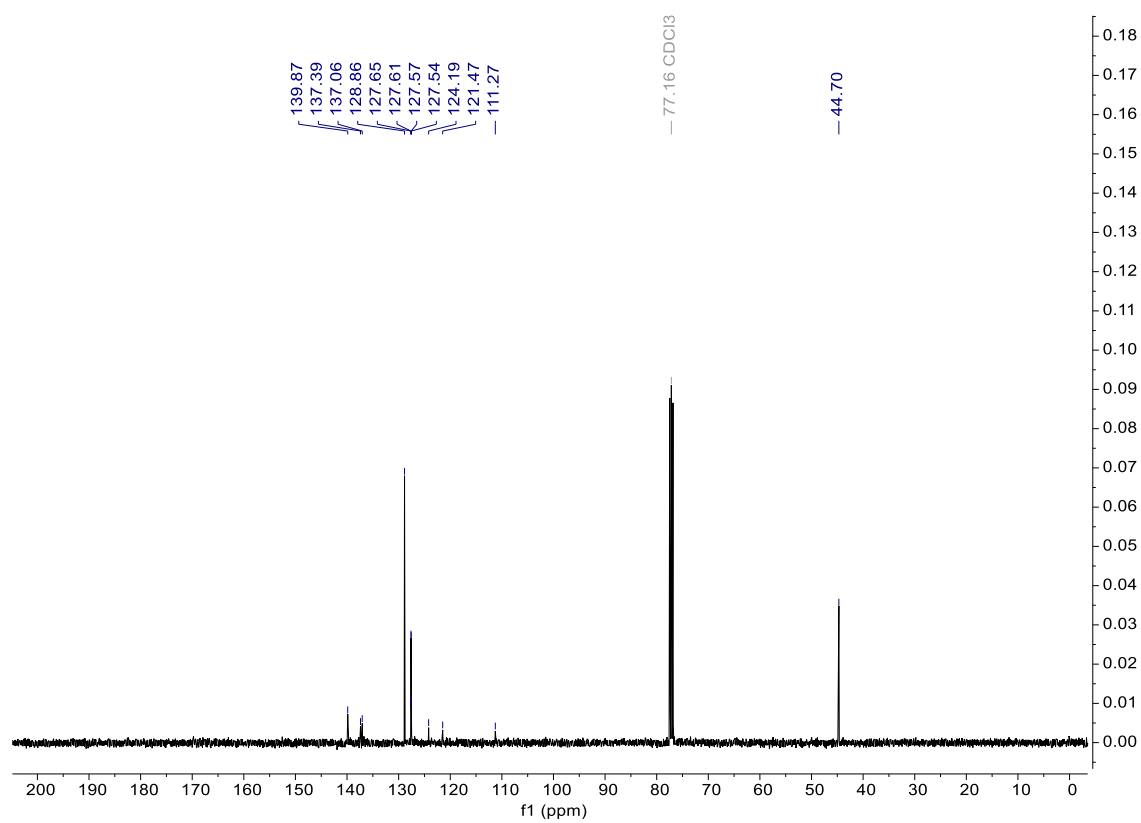

# Data for **5f**

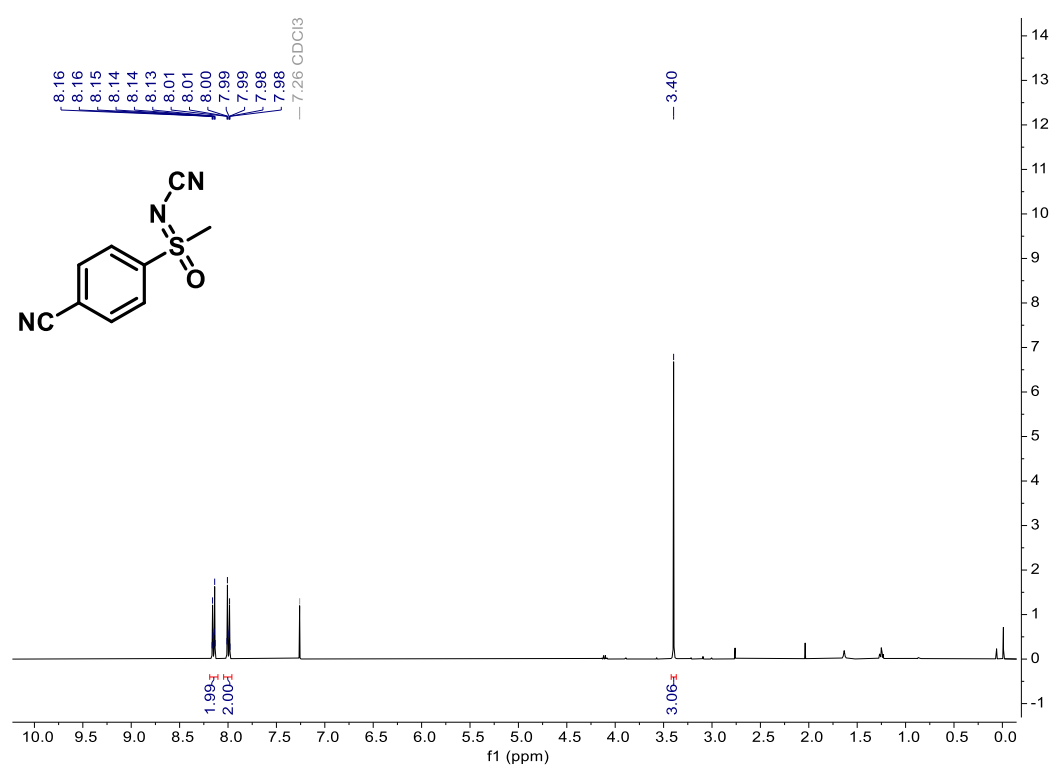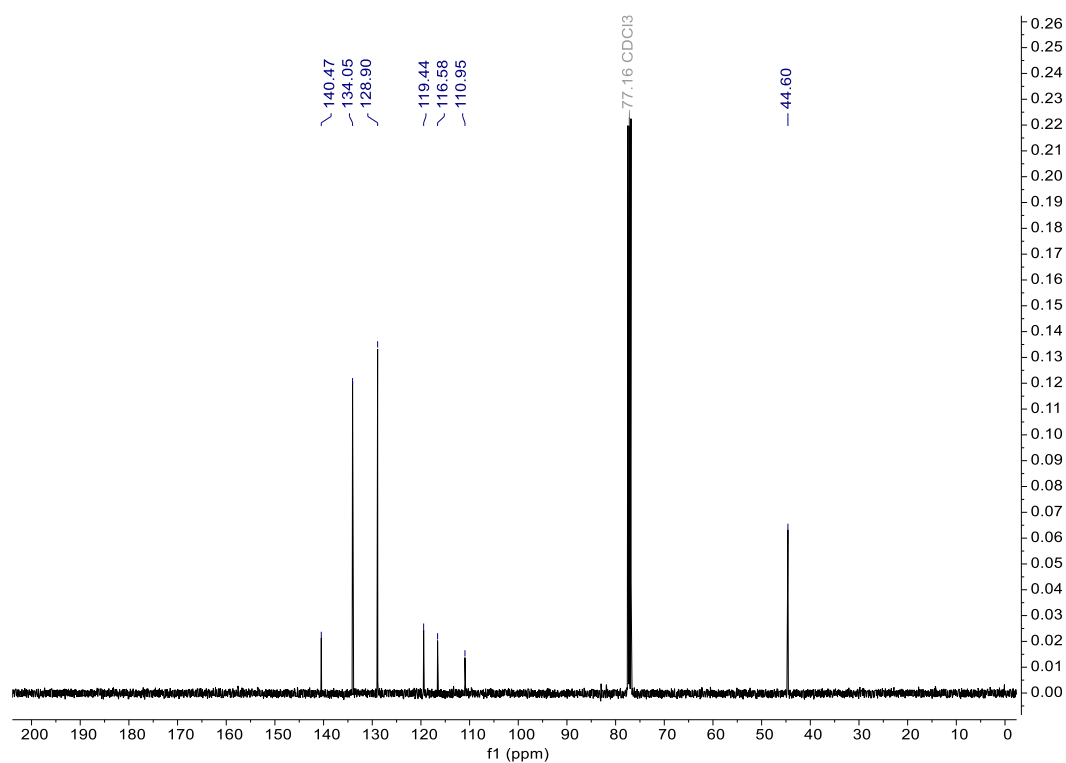

# Data for **5g**

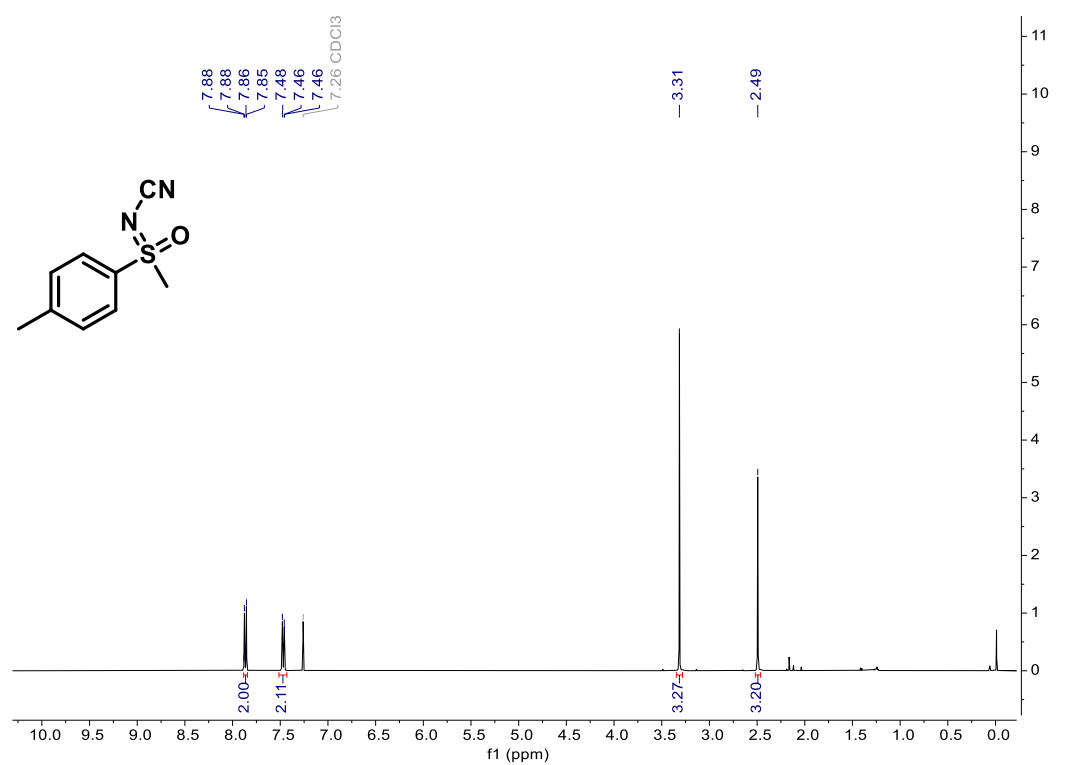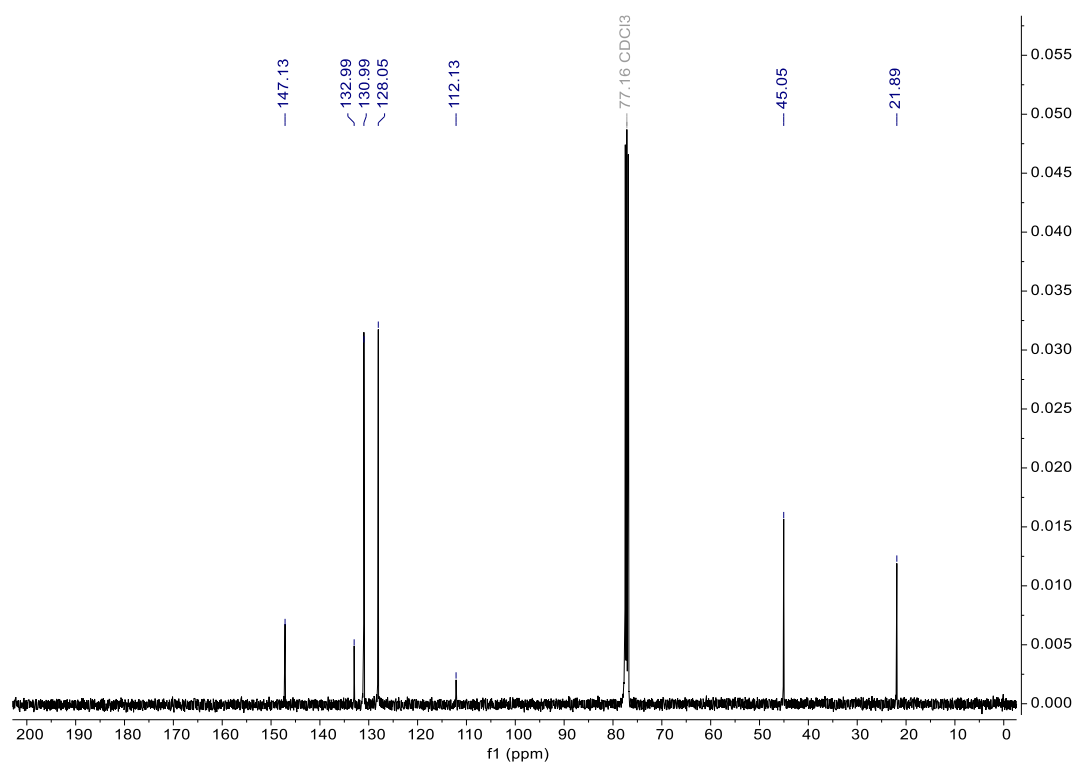

Data for **5h**:

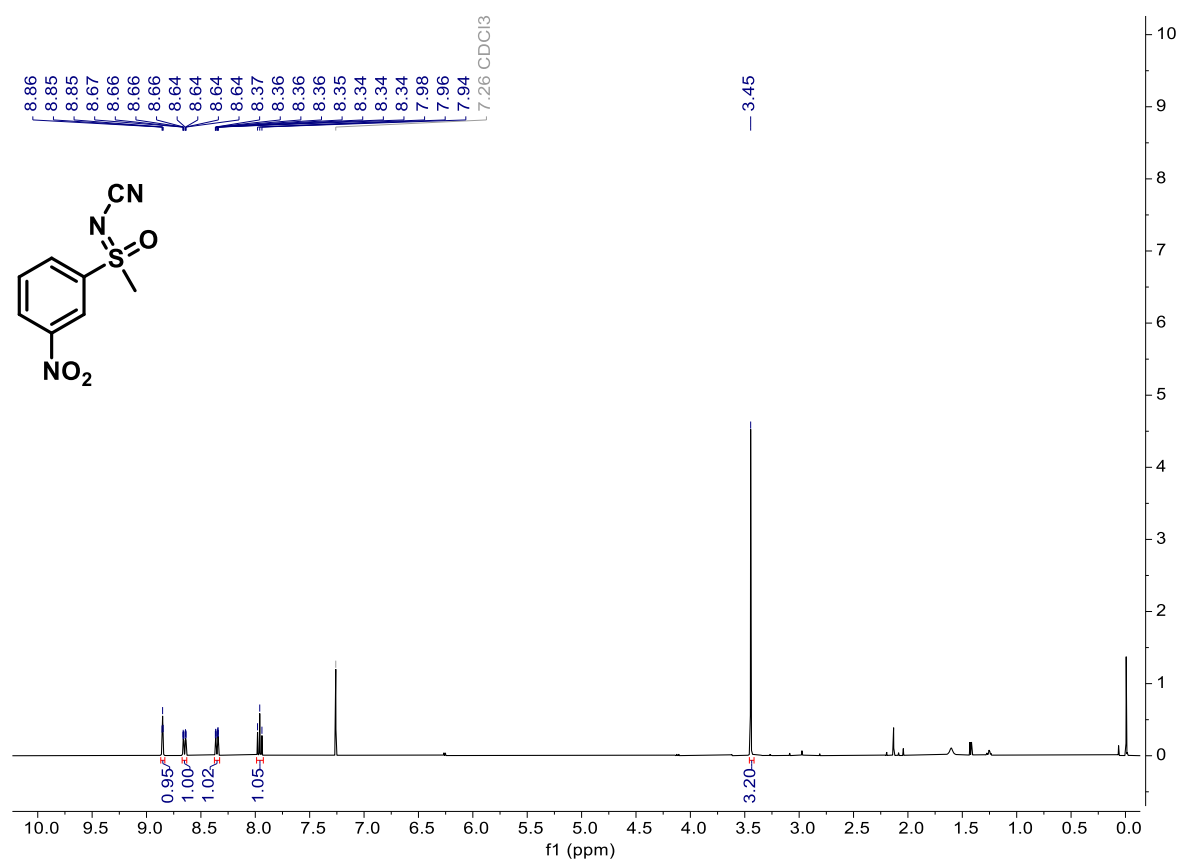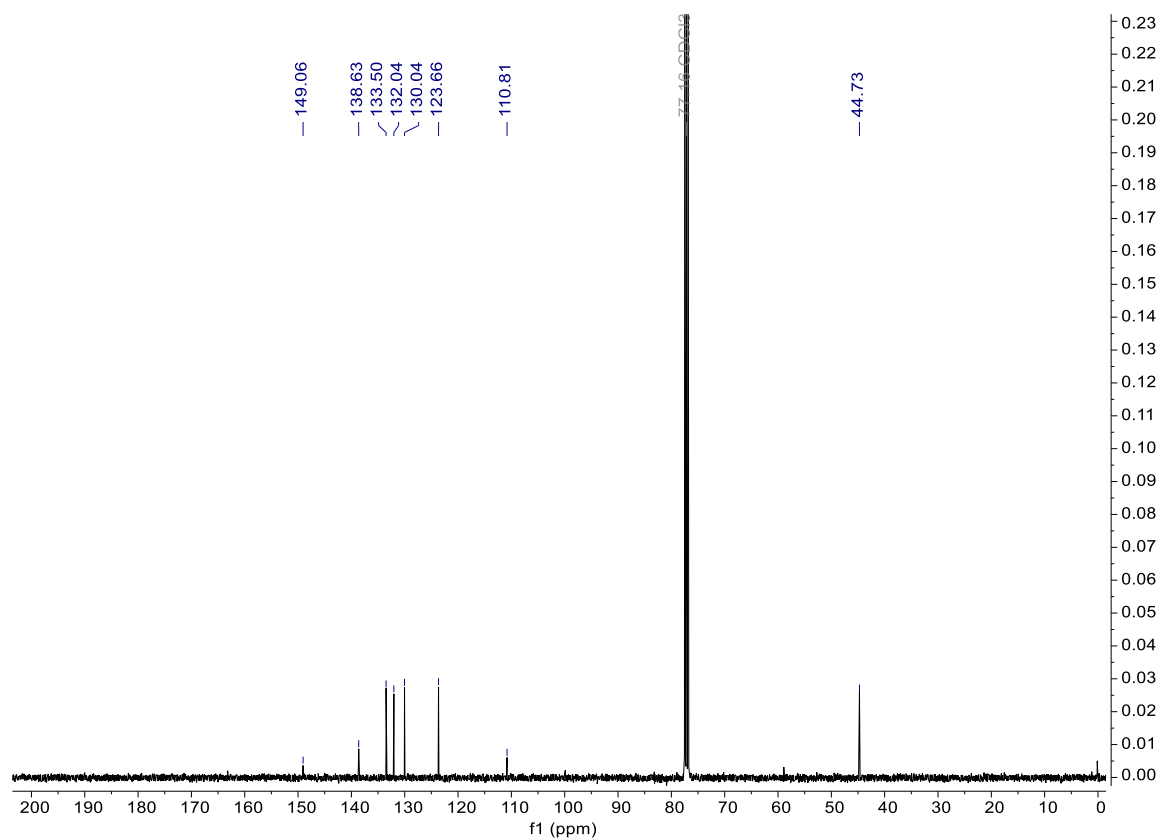

# Data for **5i**

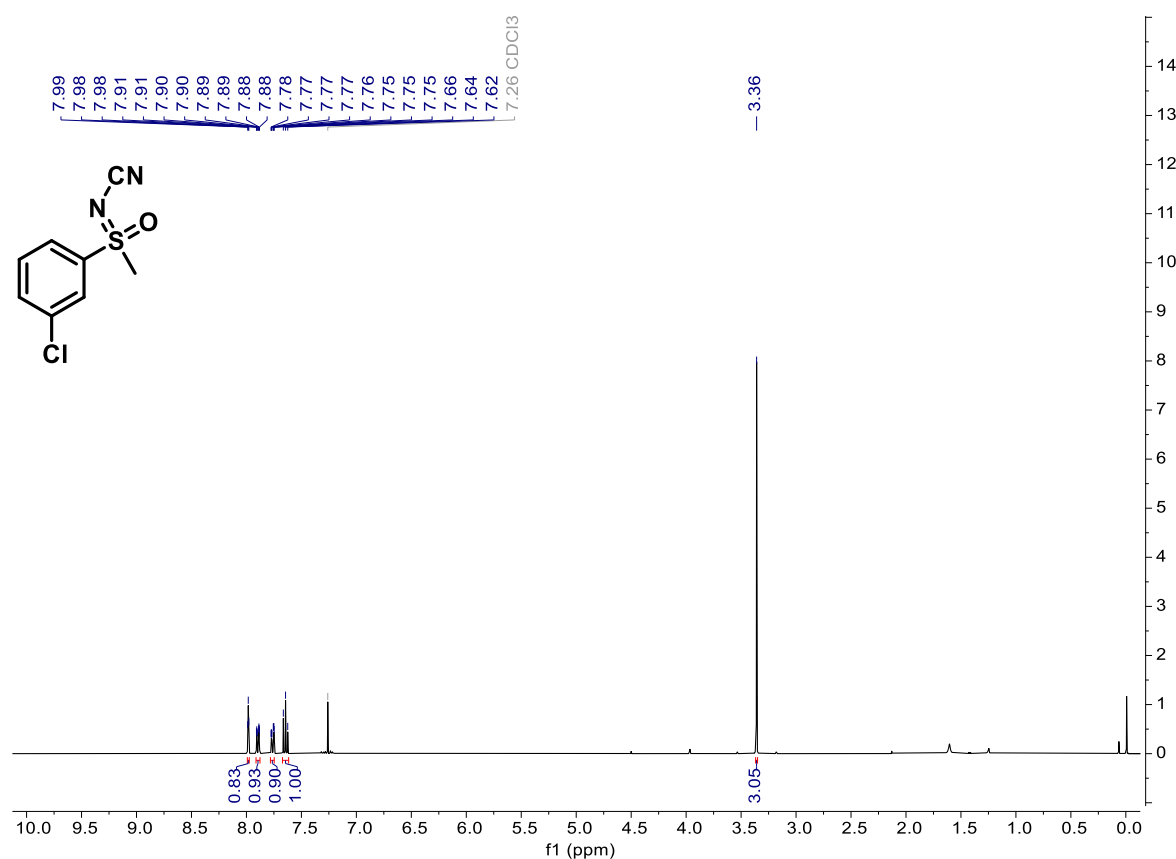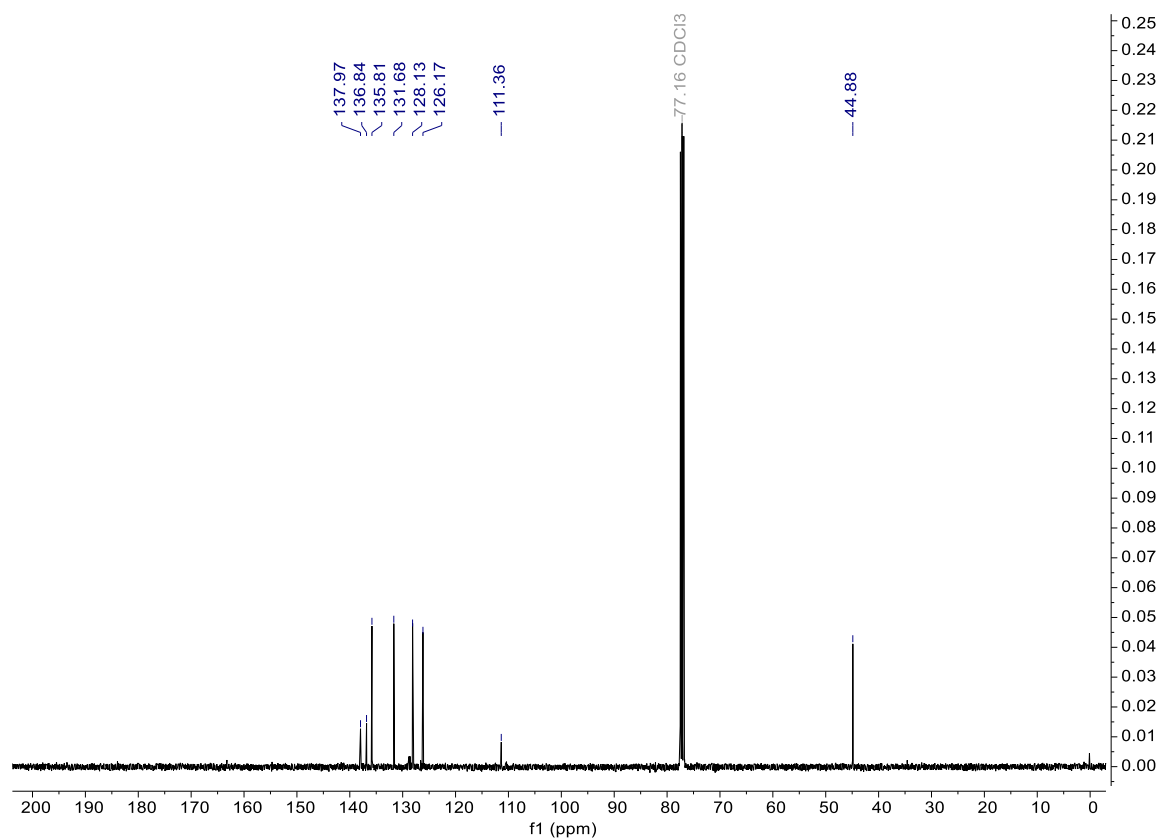



# Data for **5j**

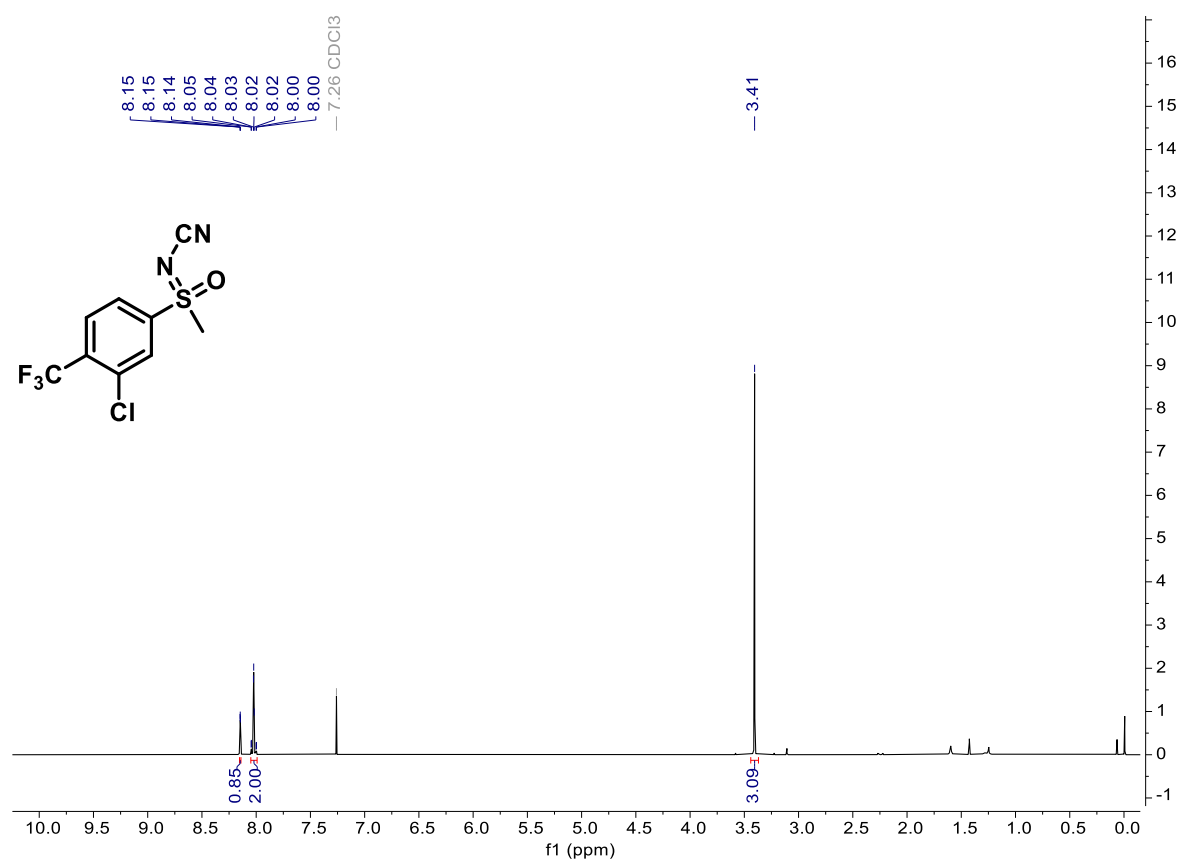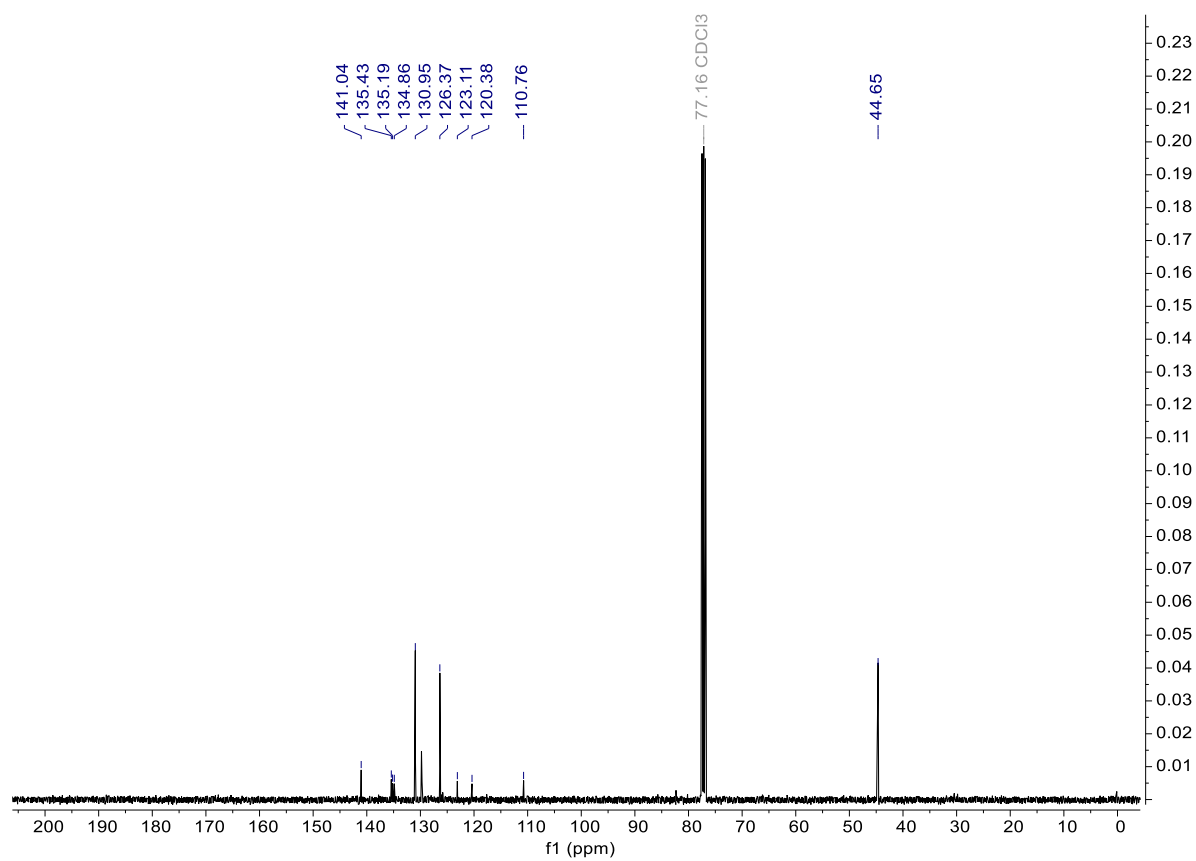

# Data for **5k**

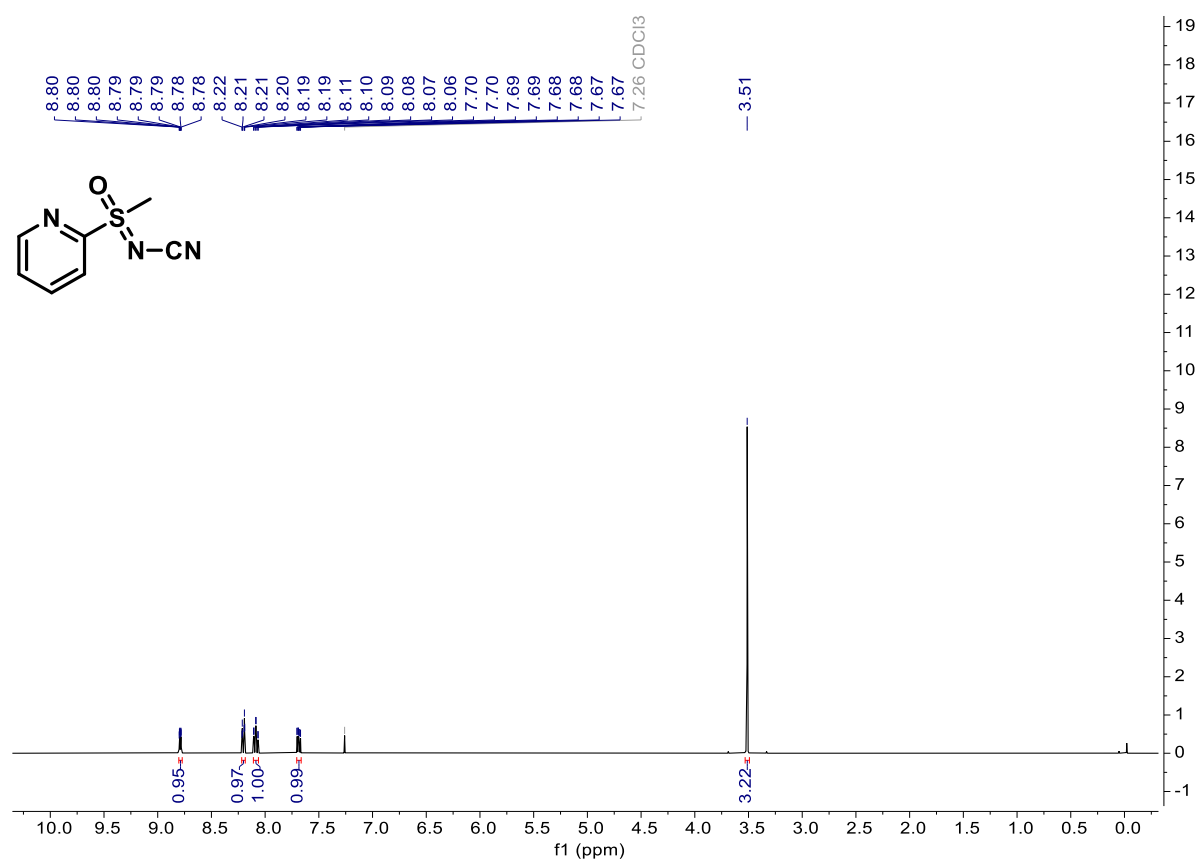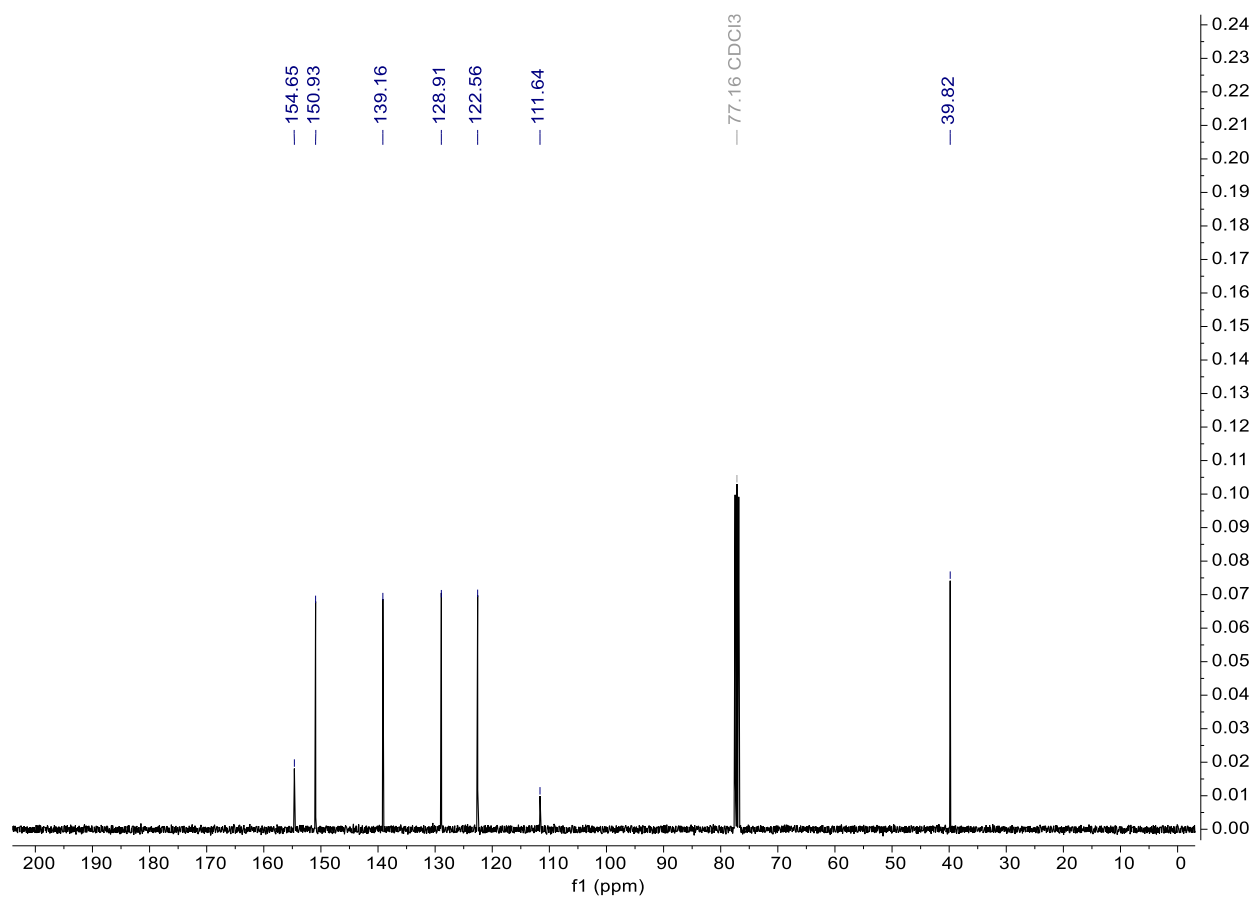

# Data for **5l**

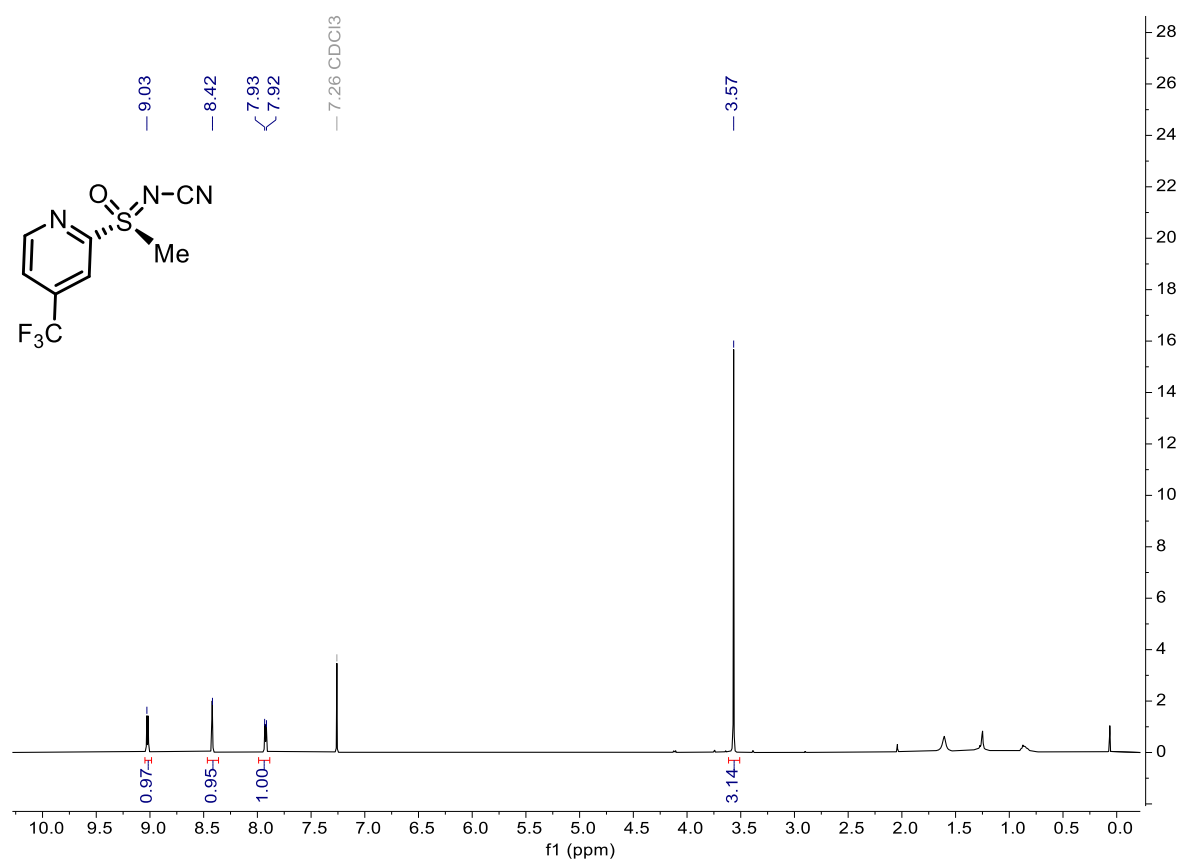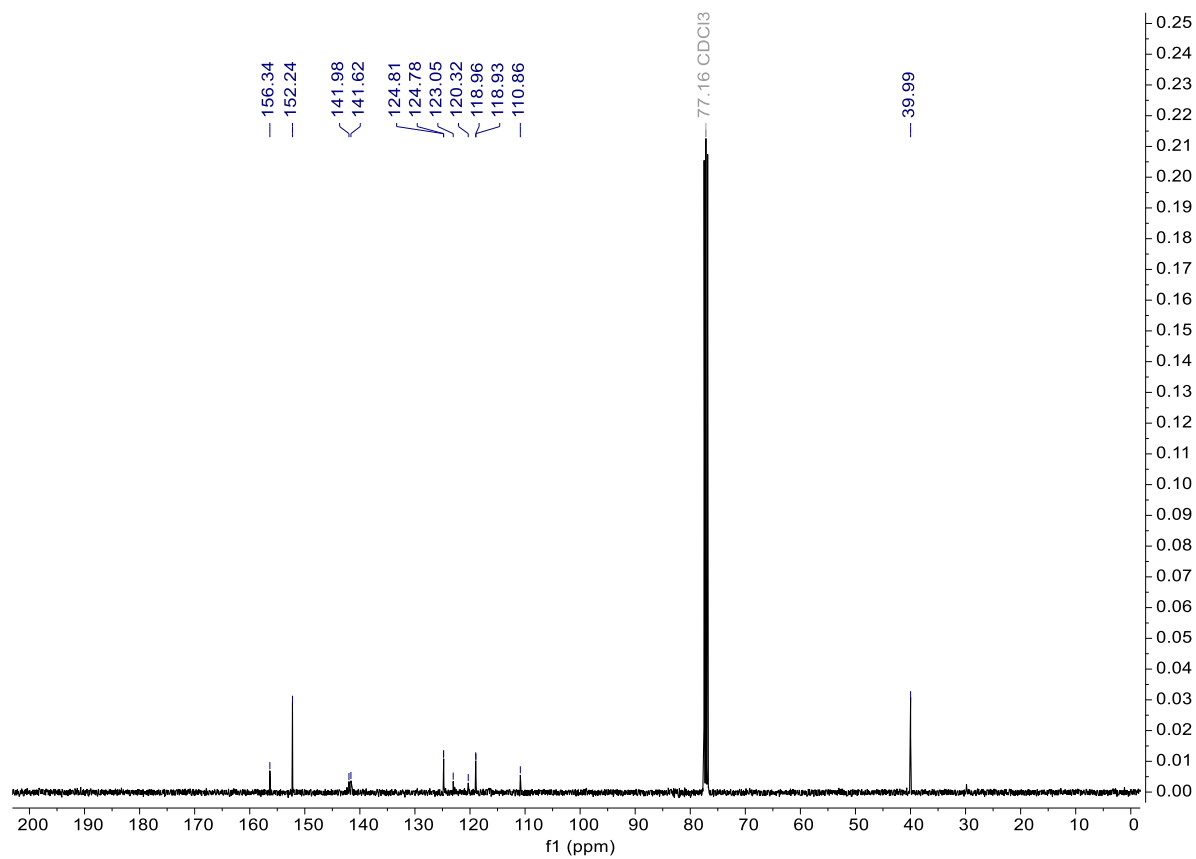

Data for **5m**:

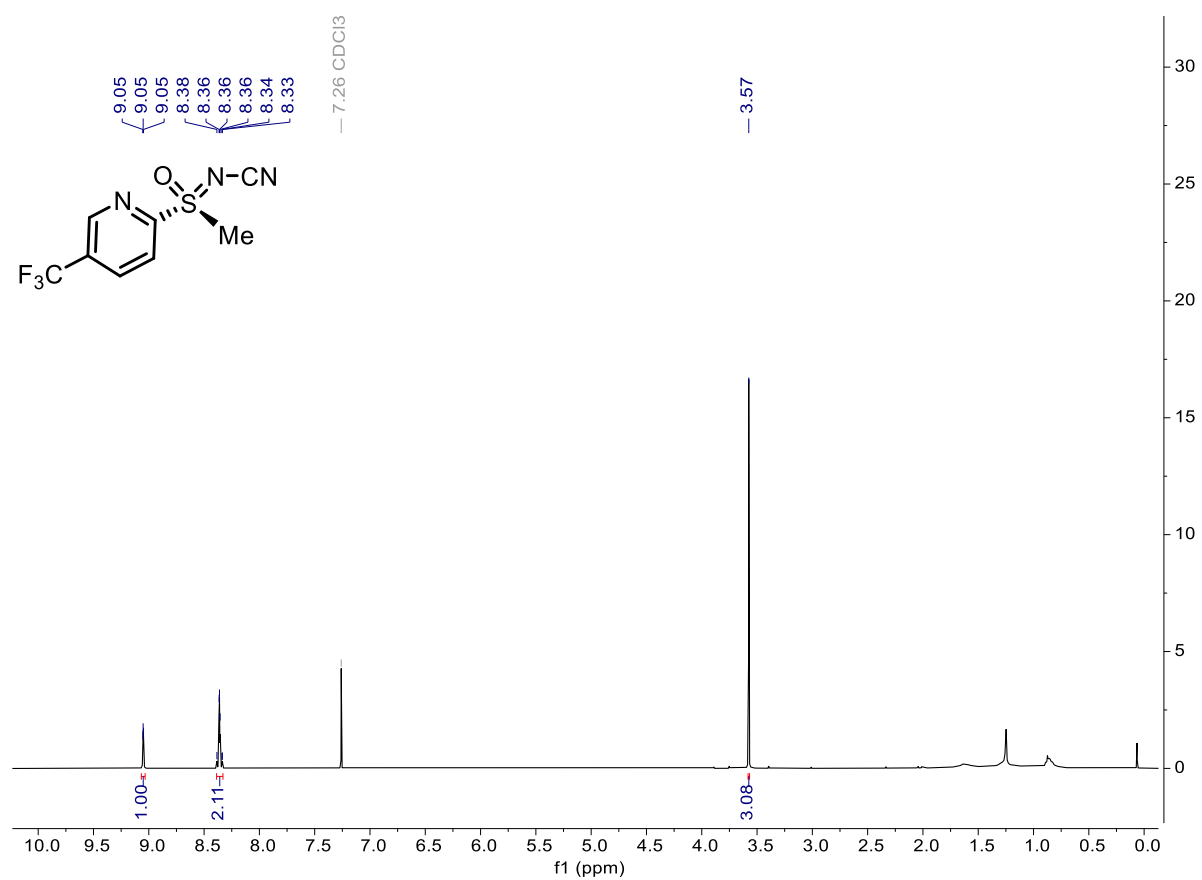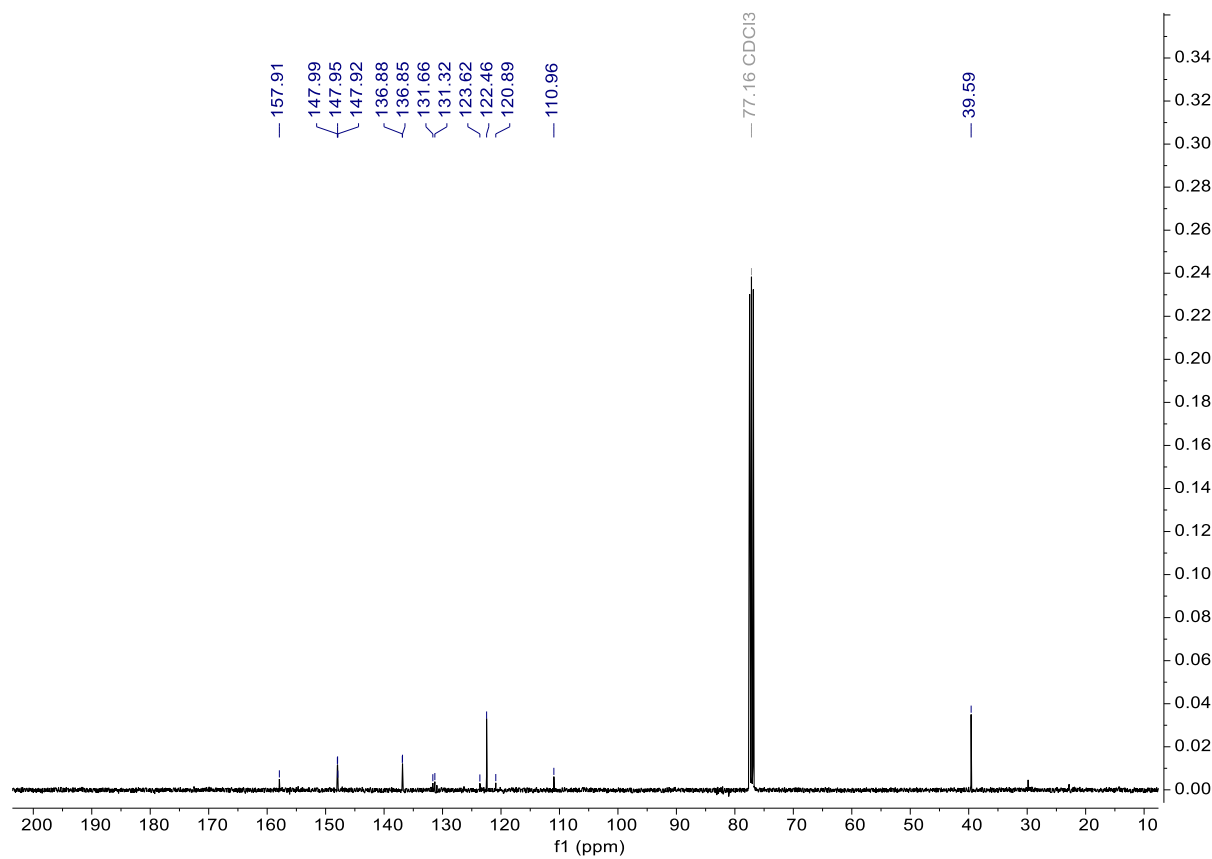

# Data for **5n**

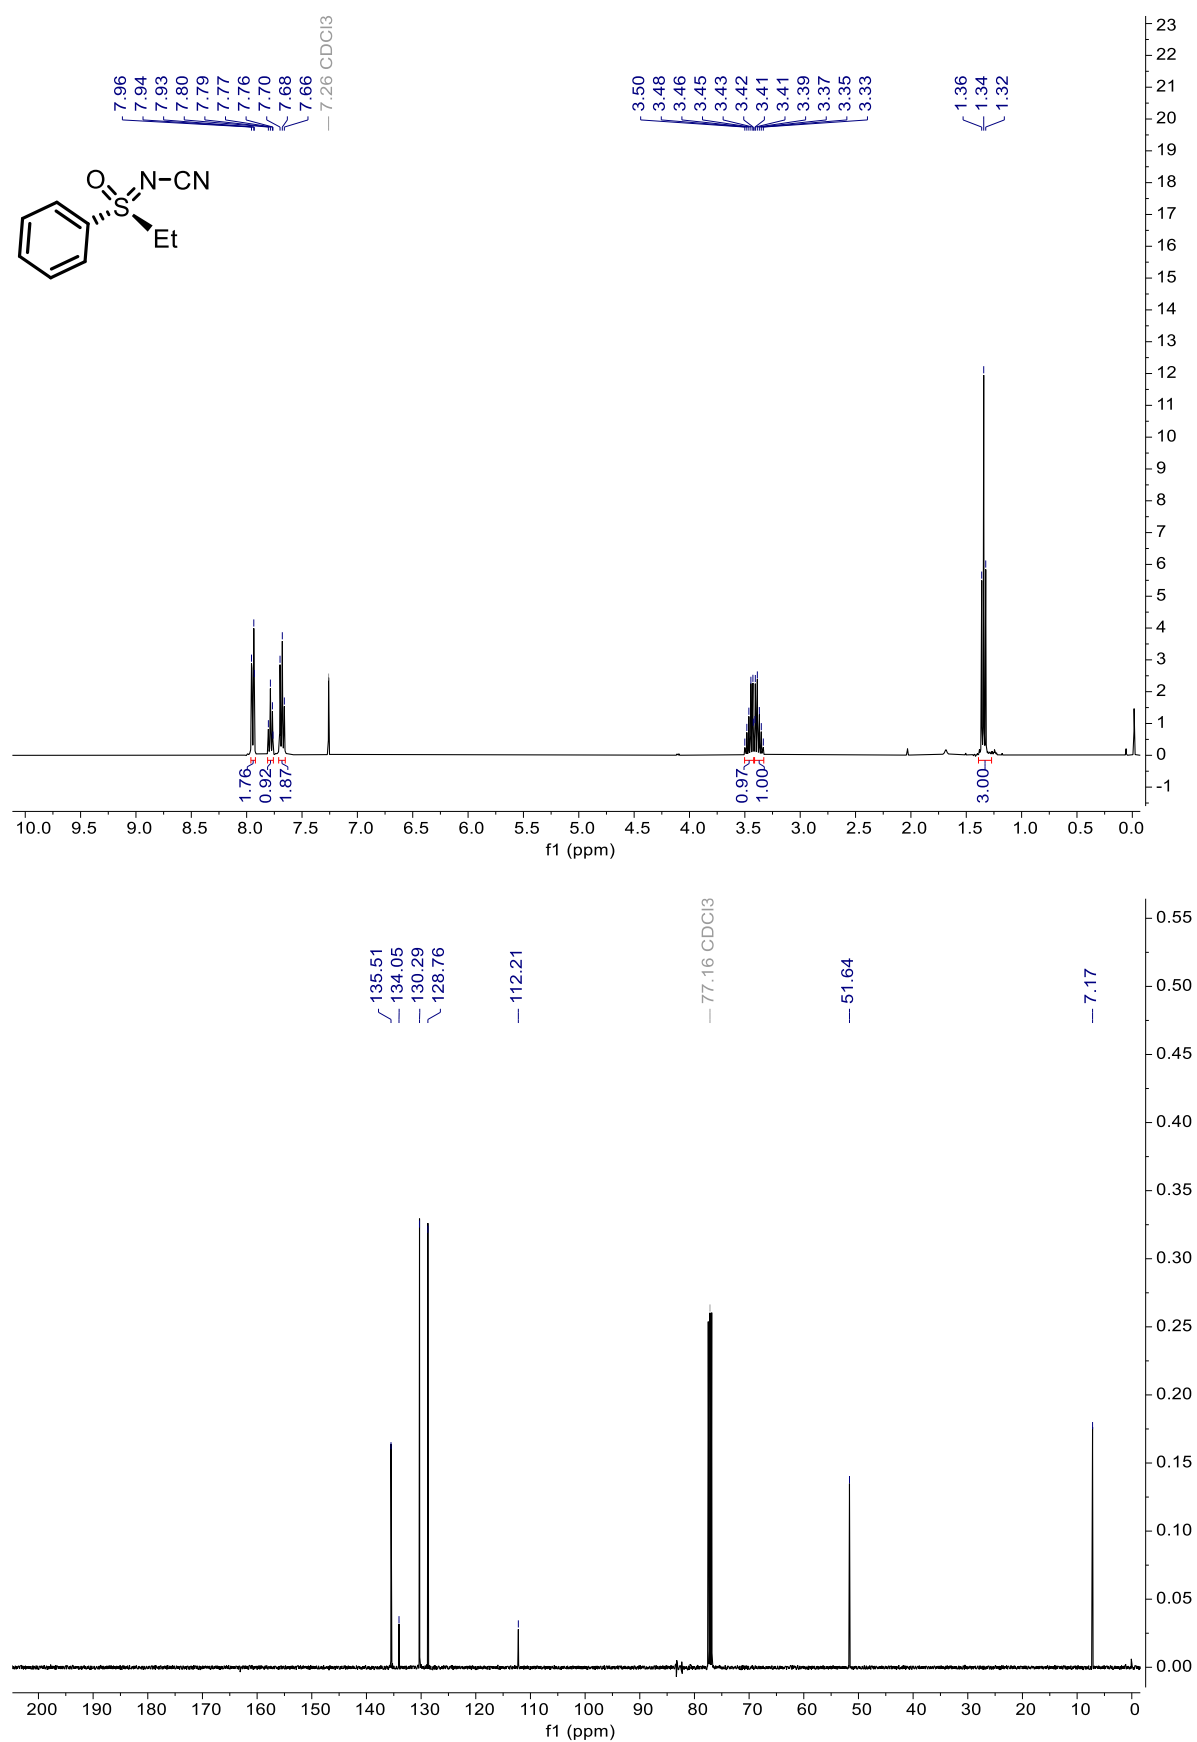

# Data for **50**

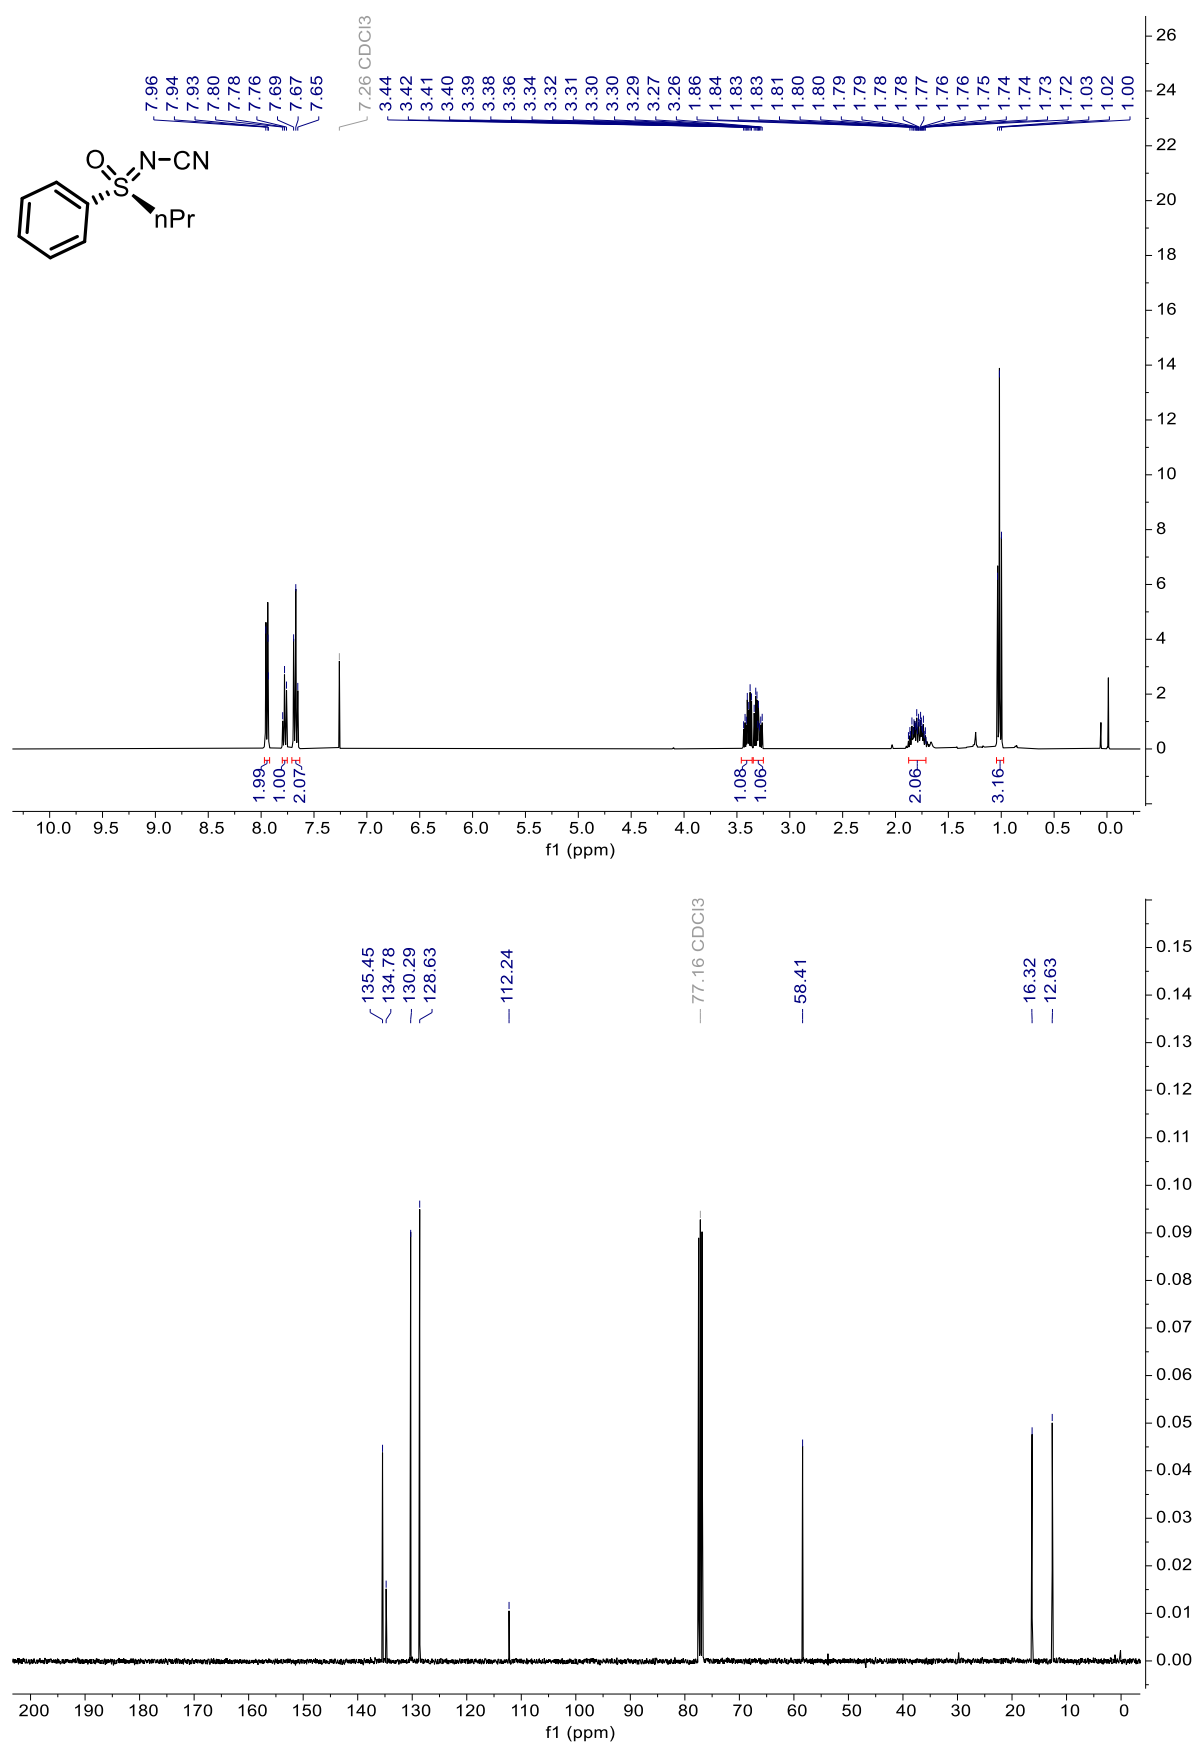

# Data for **5p**

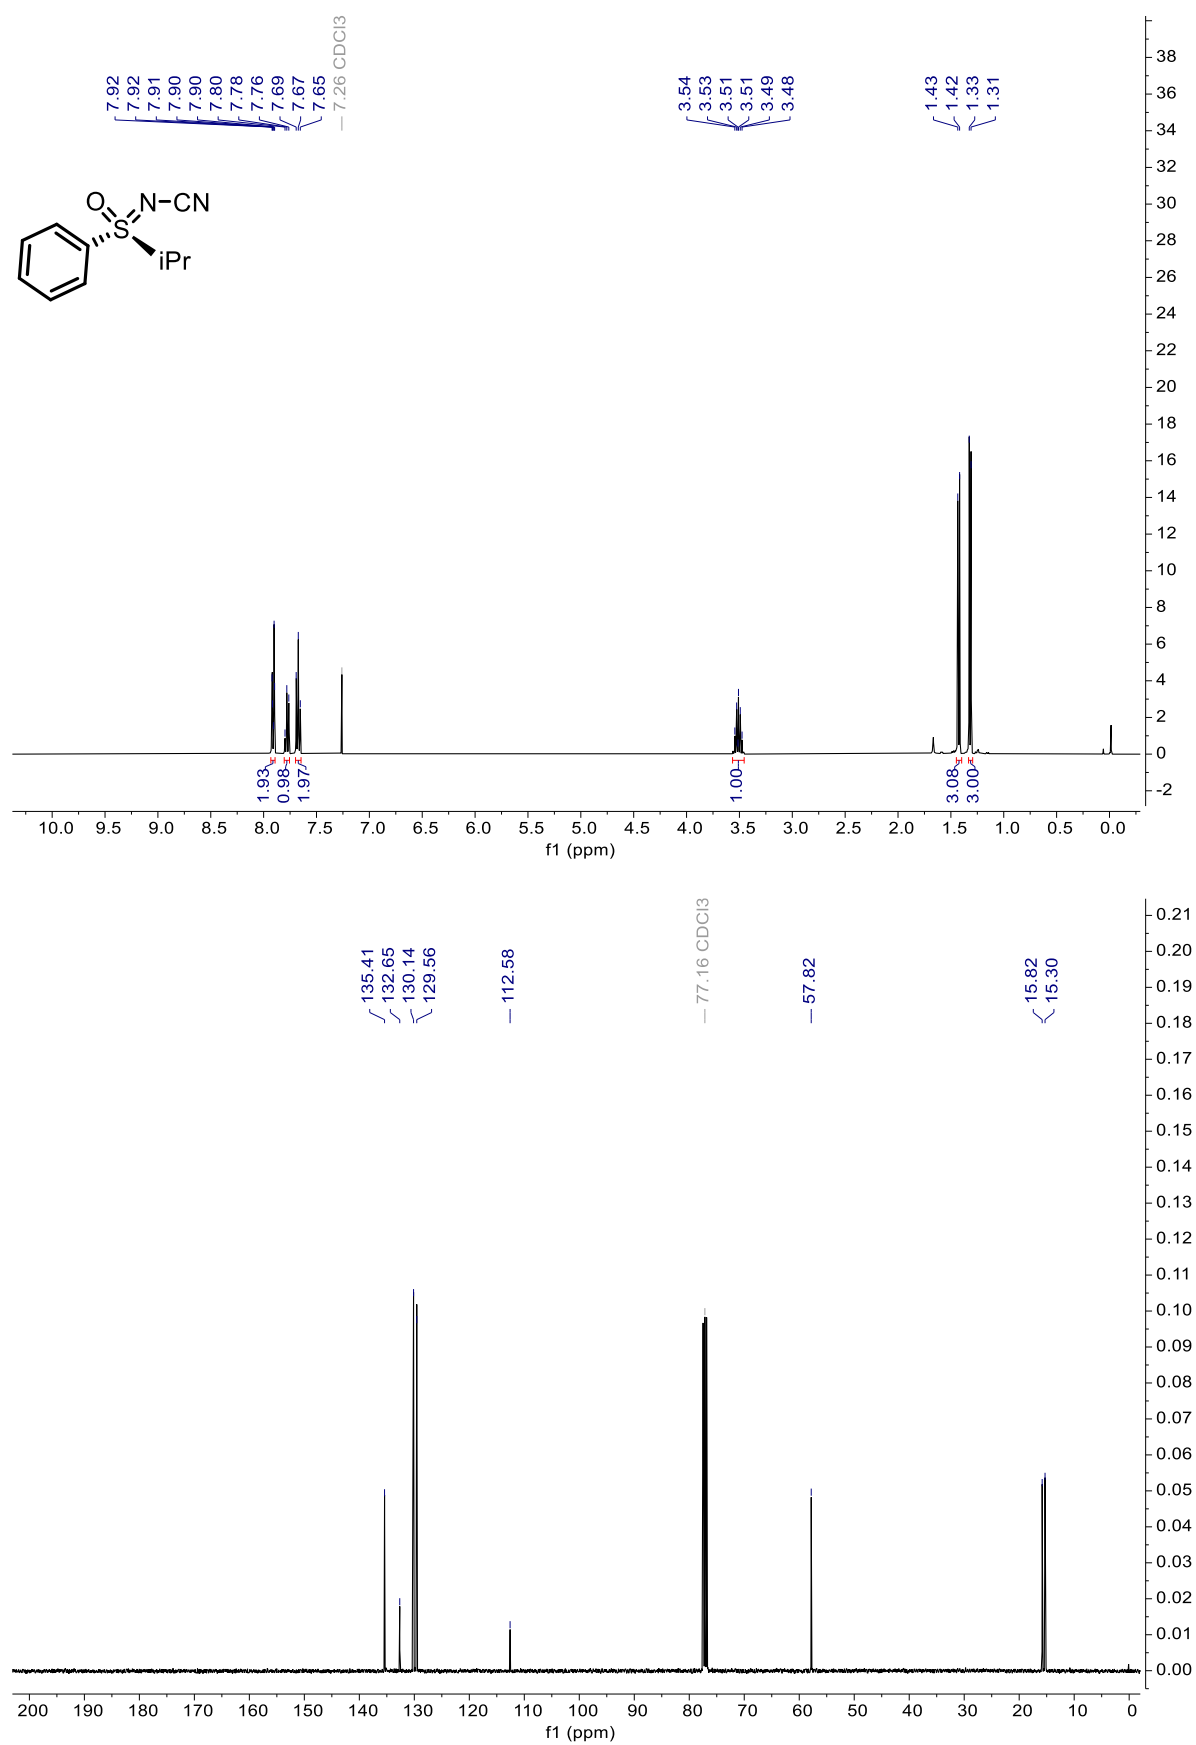

# Data for **5q**

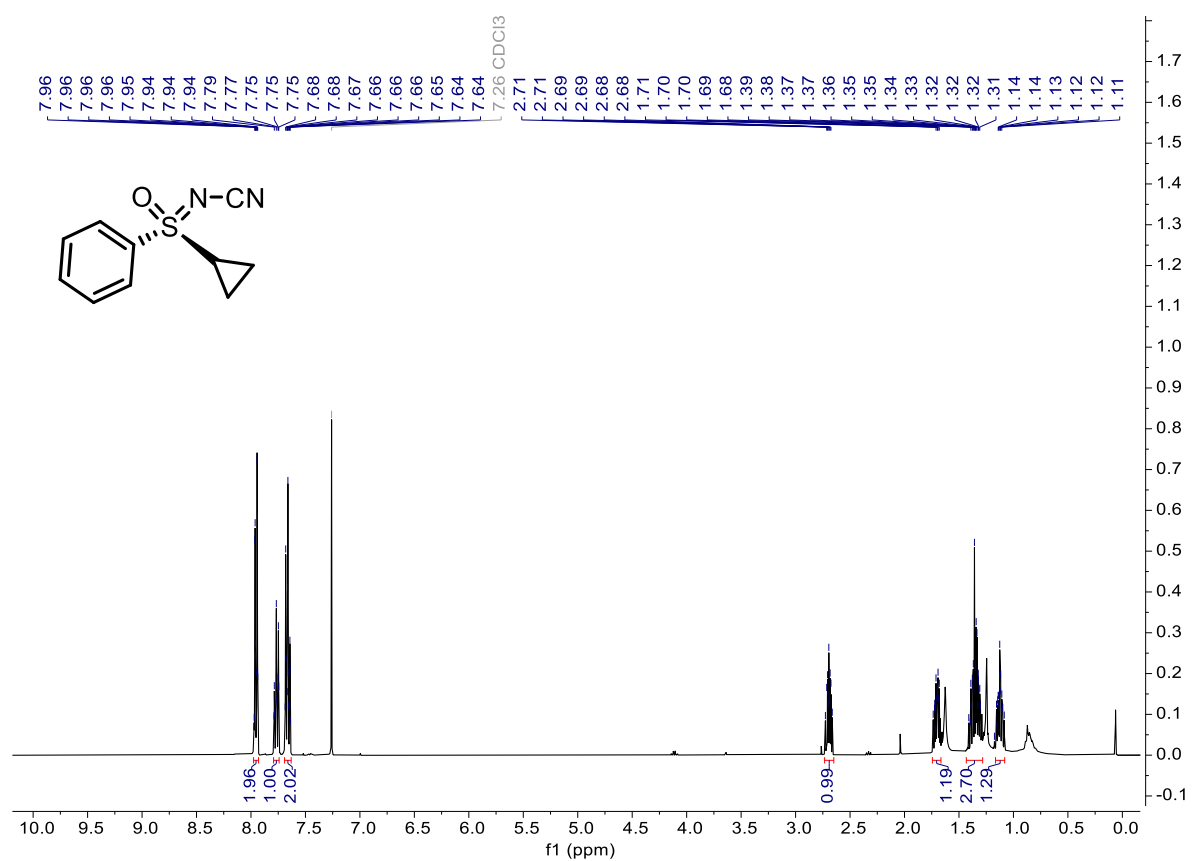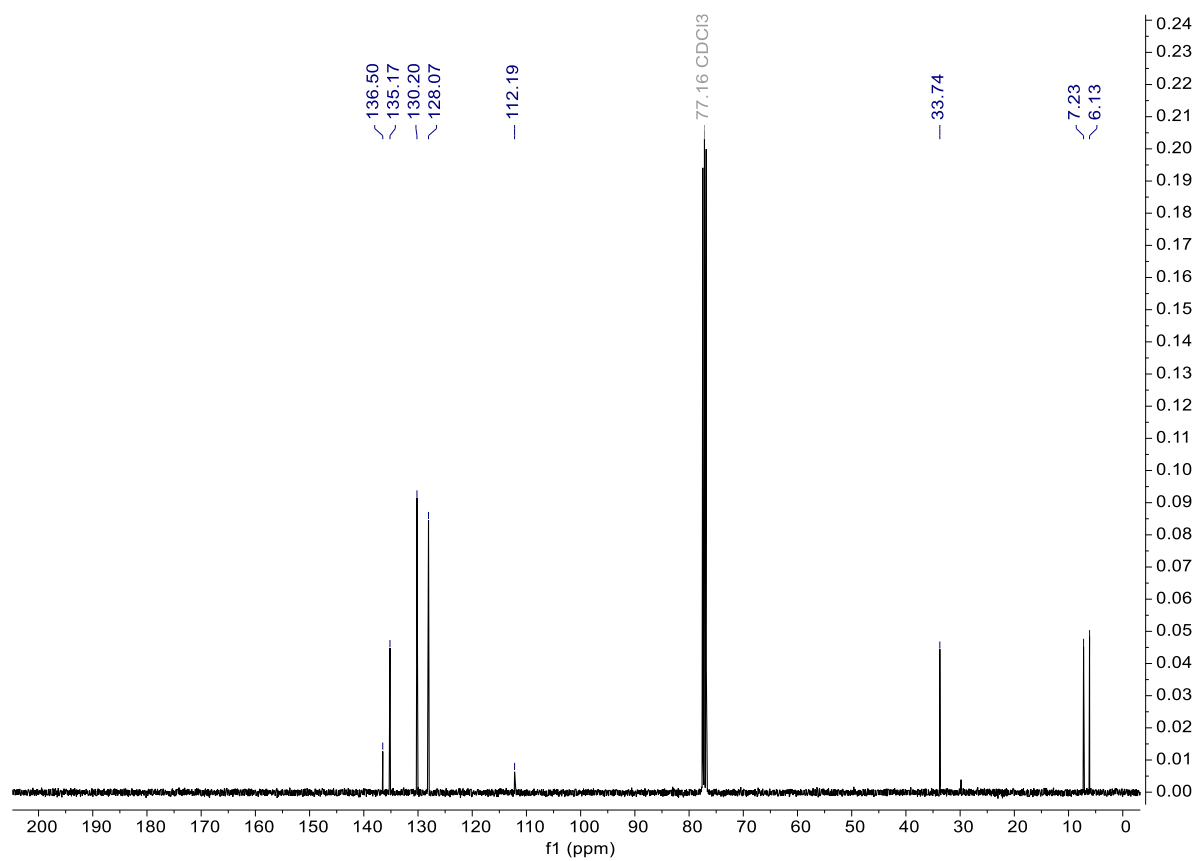



# Data for **5r**

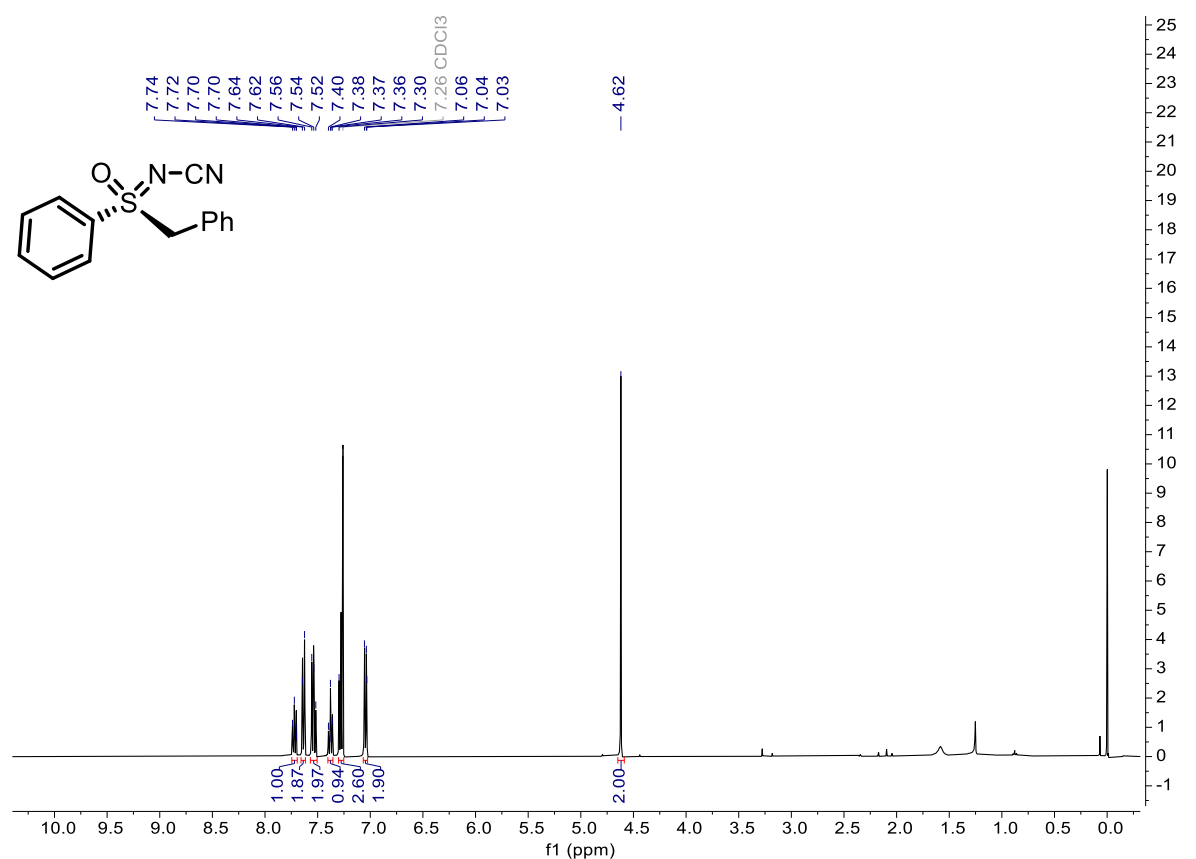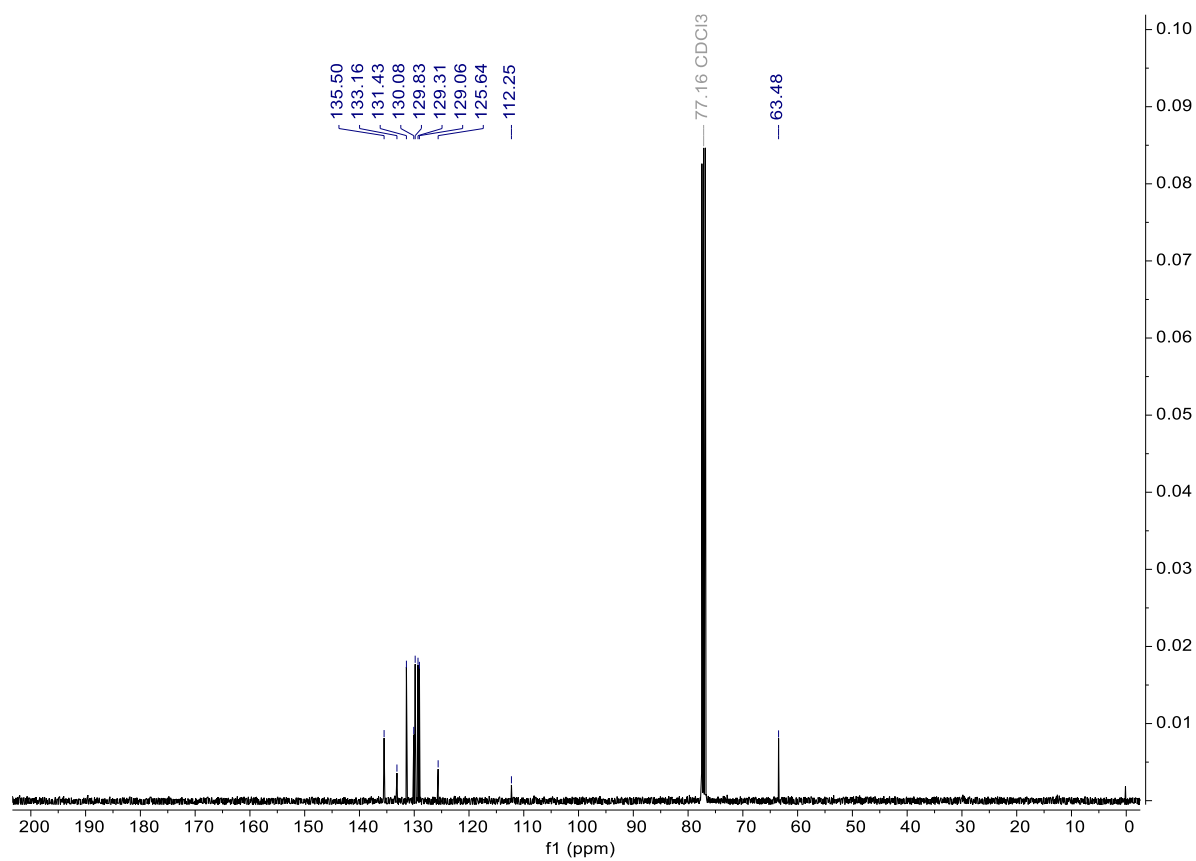

# Data for **5s**

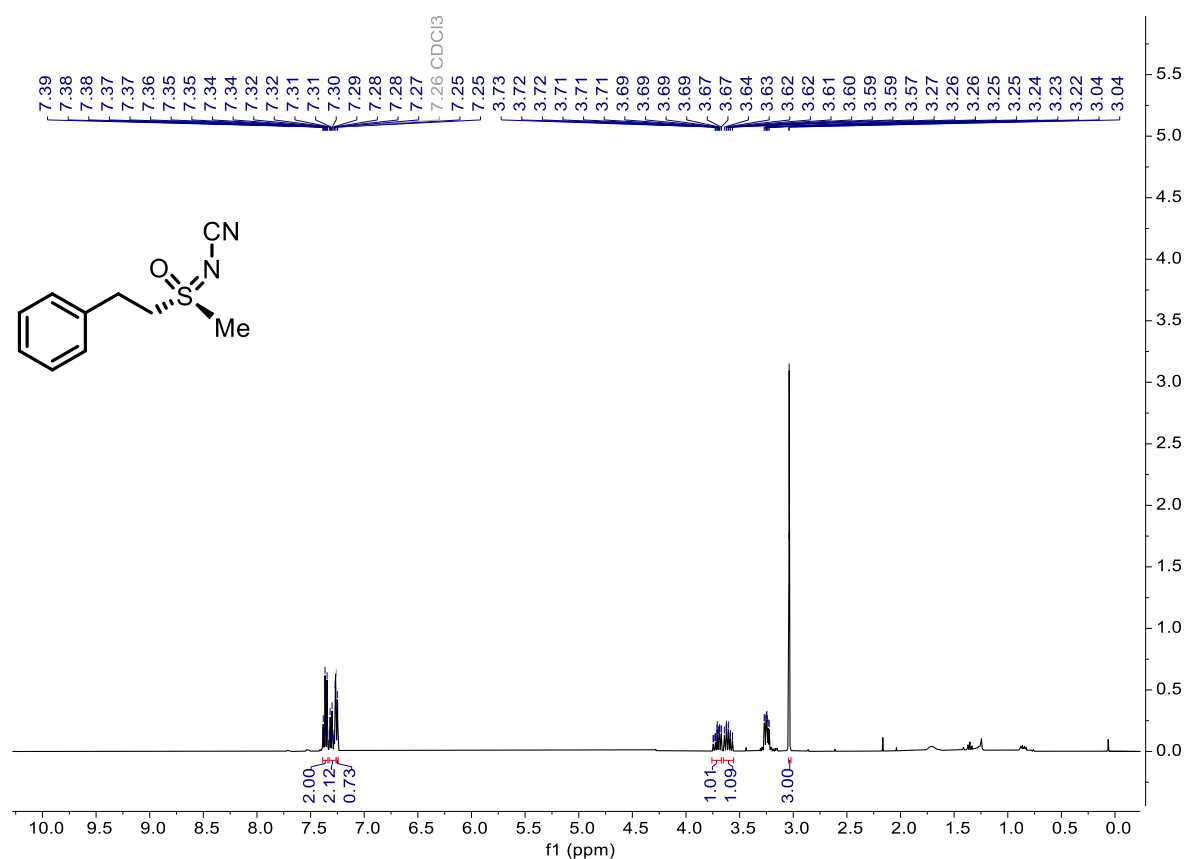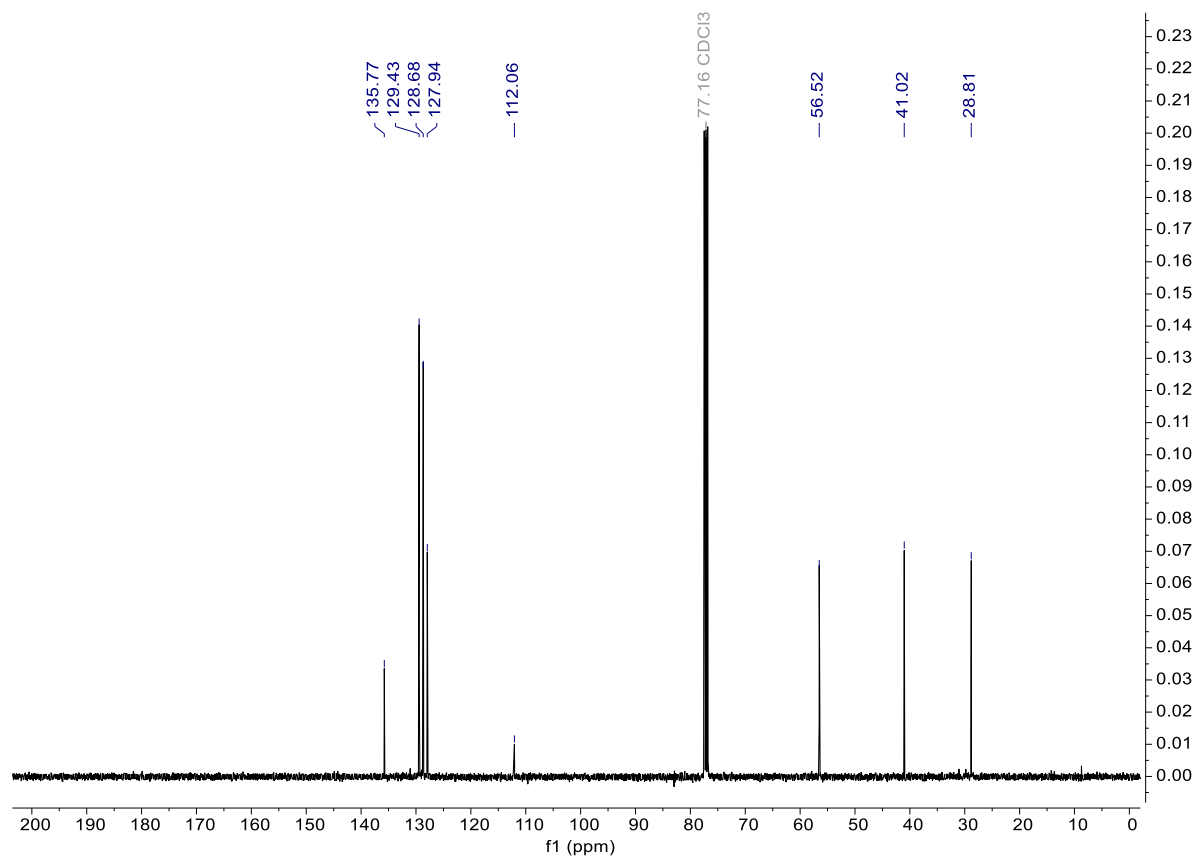

Data for **5t**:

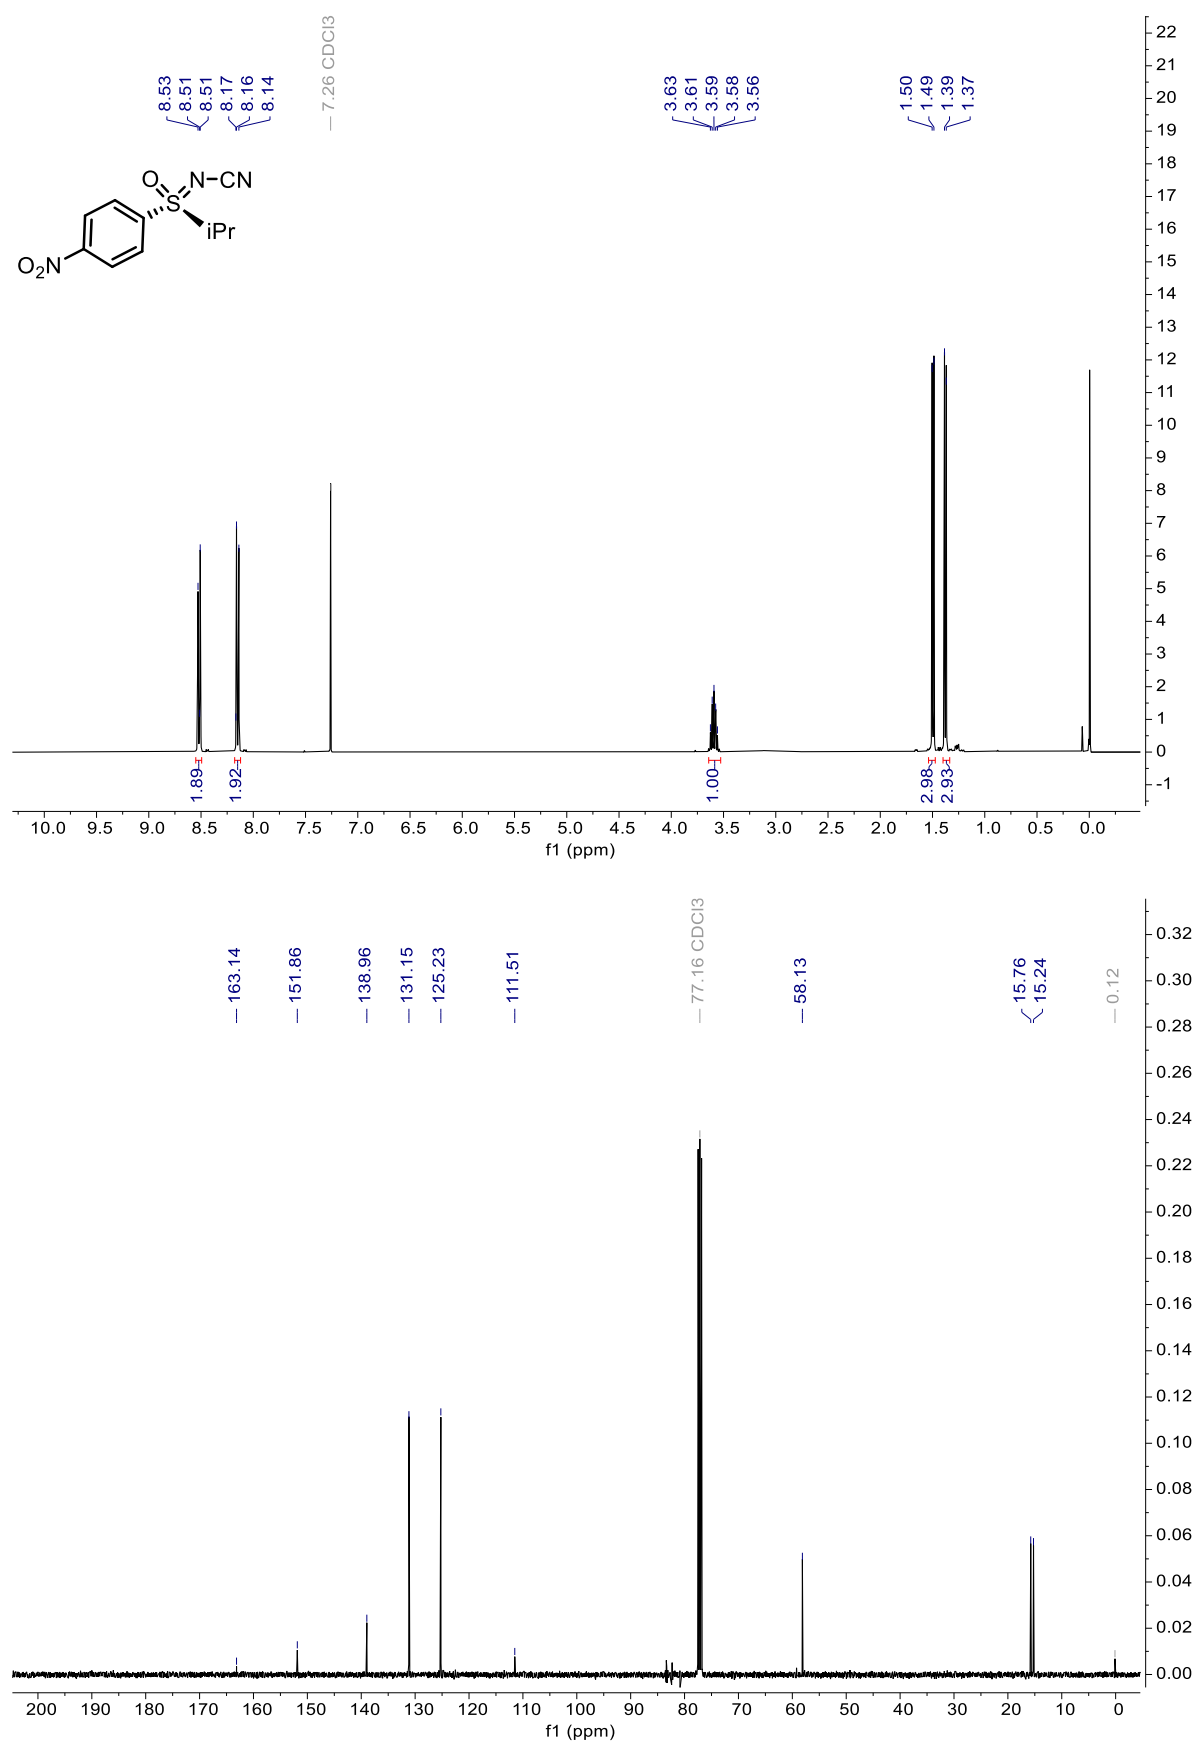

Data for **5u**:

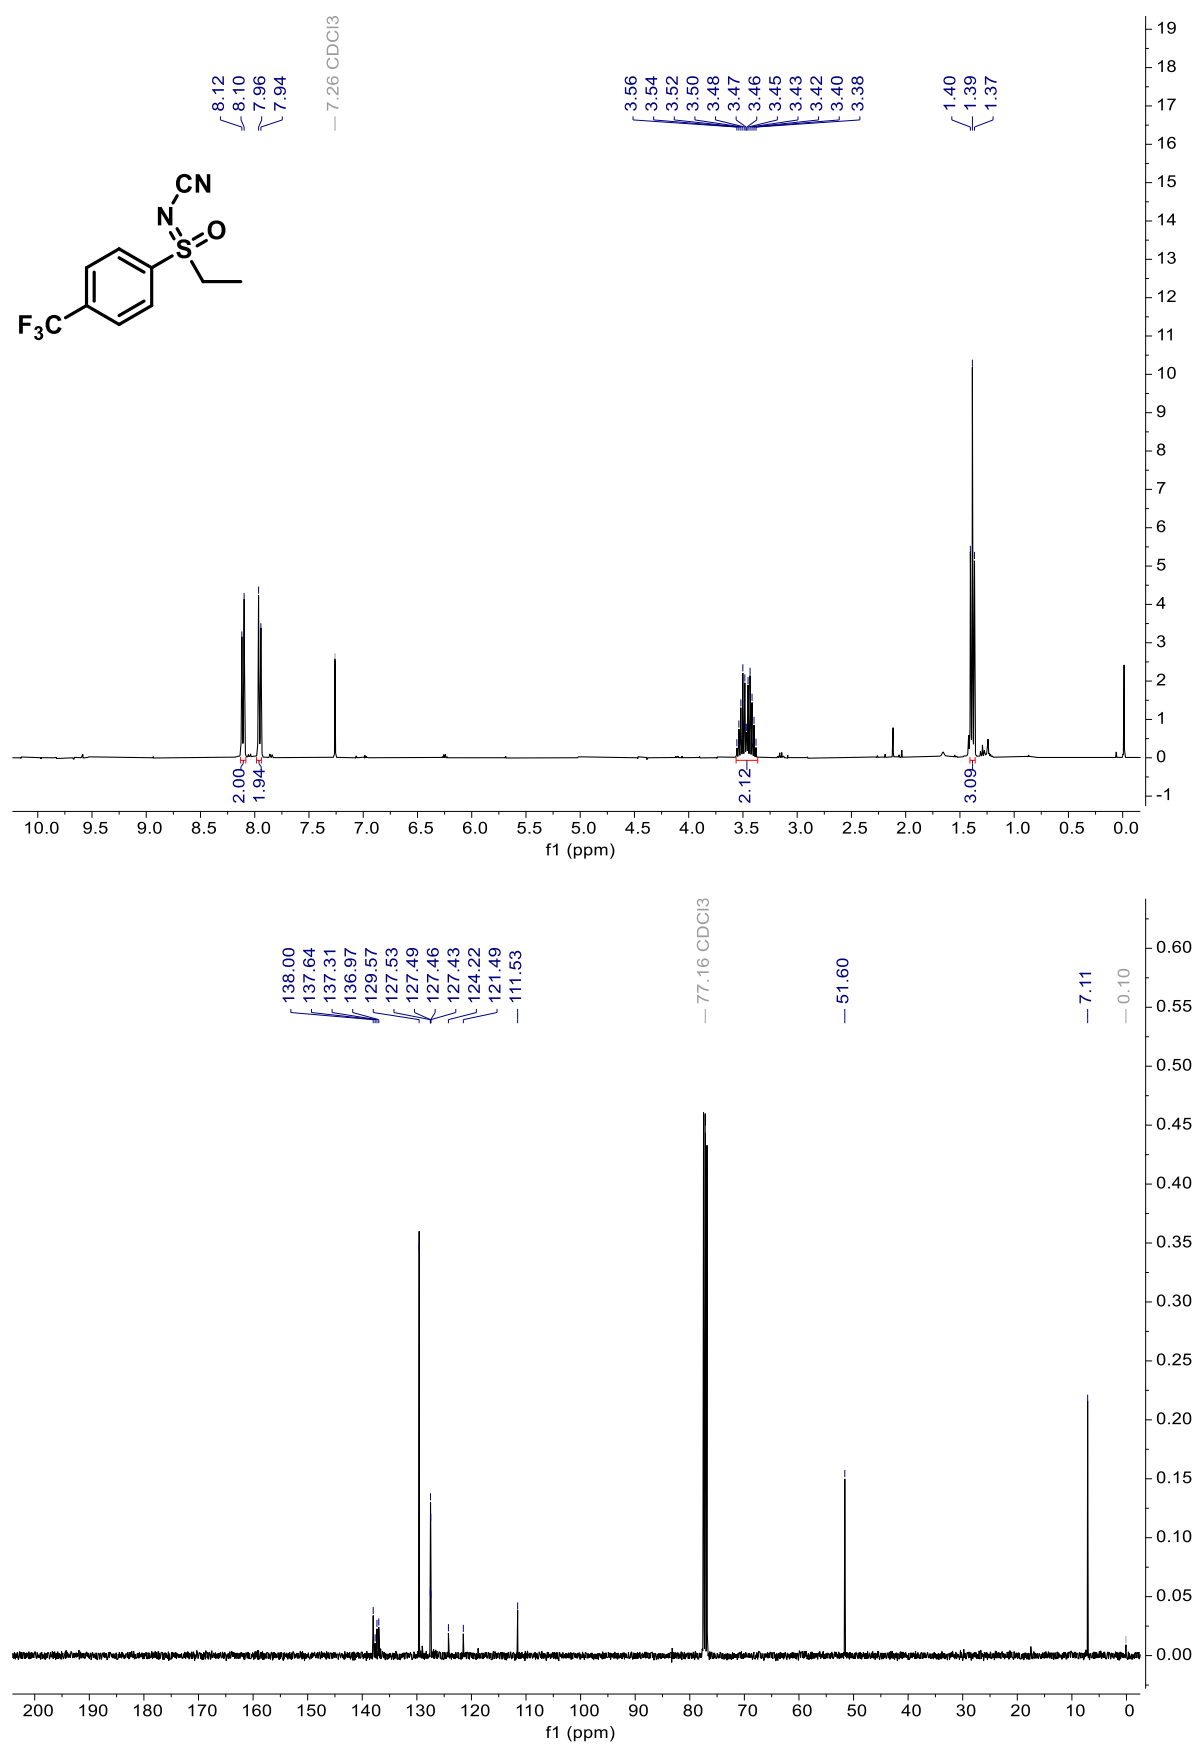

# Data for **9e**

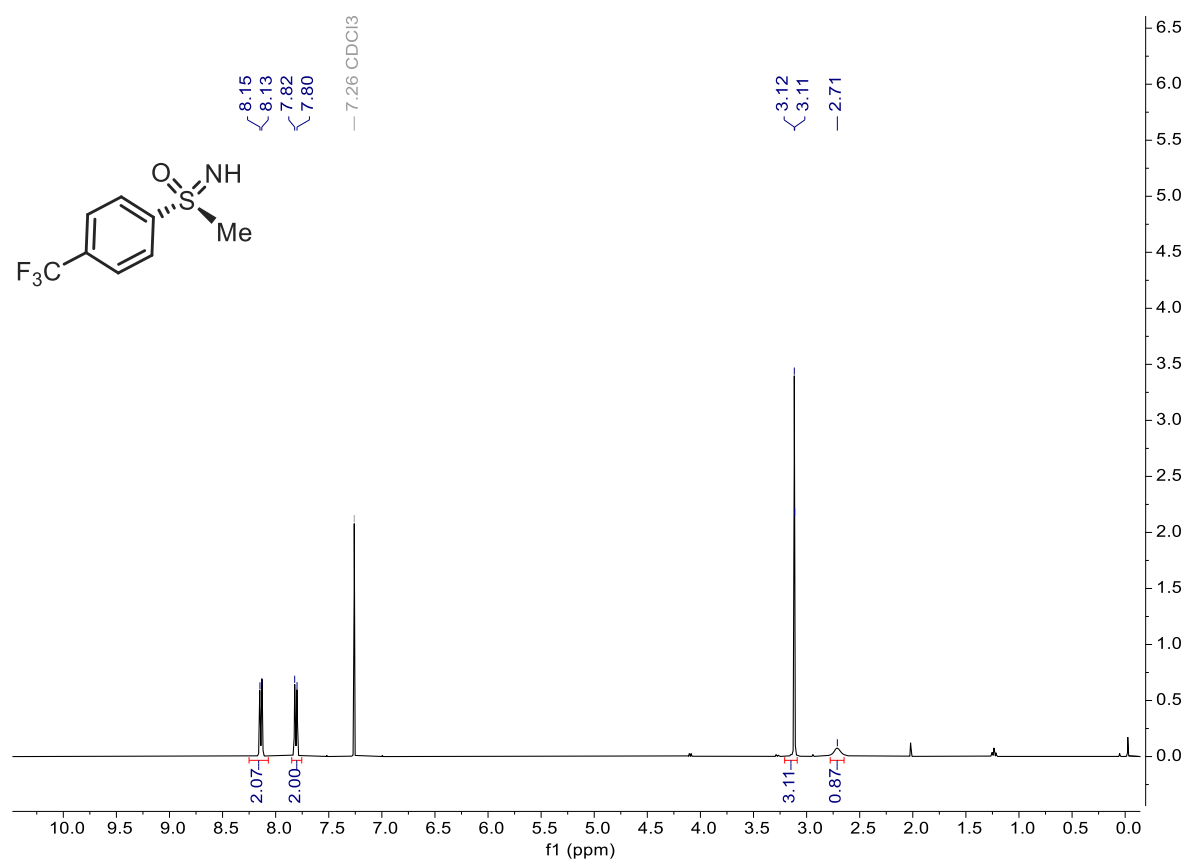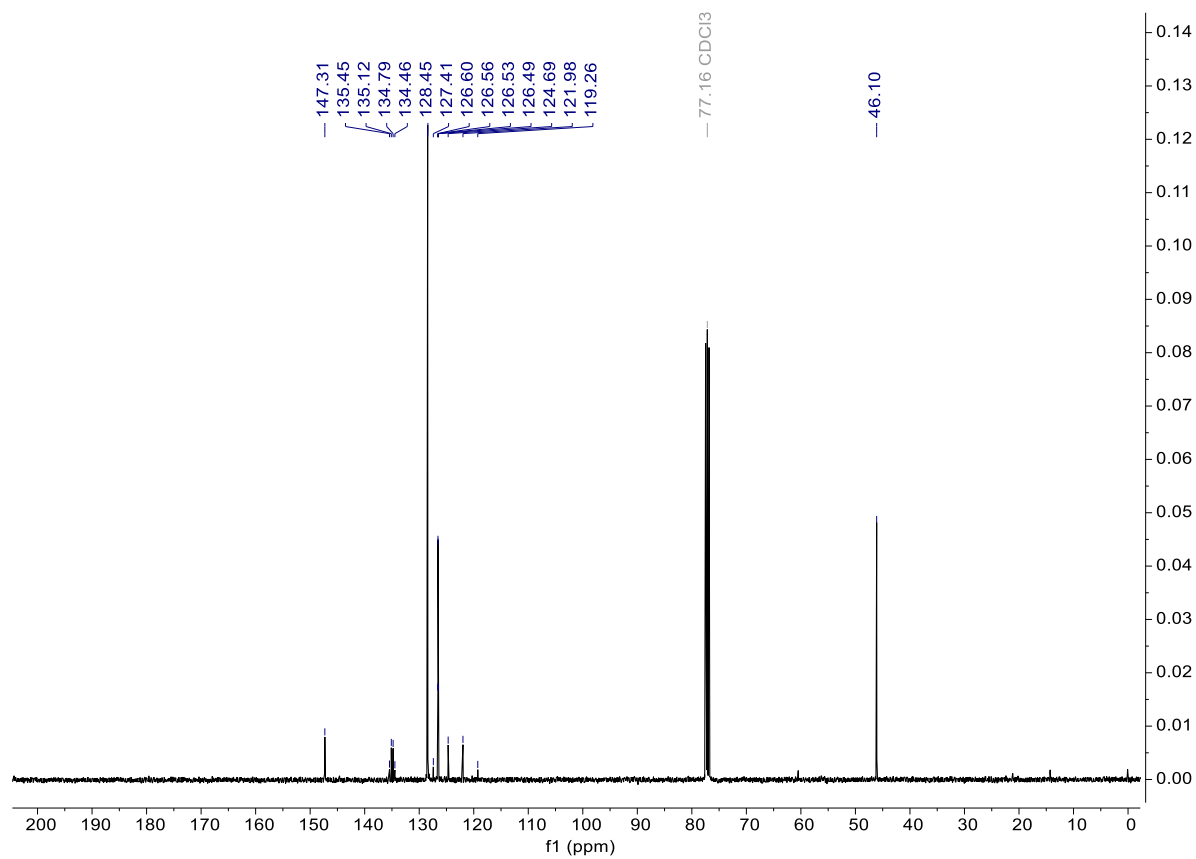

# Data for **6a-*i*Pr**

c0924jdj  
Jason Li - LIC-230-S

8.47  
7.64  
7.63  
7.63  
7.62  
7.62  
7.61  
7.41  
7.40  
7.39  
7.39  
7.38  
7.38  
7.37  
7.37  
7.36  
7.36  
7.35  
7.35  
7.26

3.60  
3.56  
3.55  
3.53

1.44  
1.42

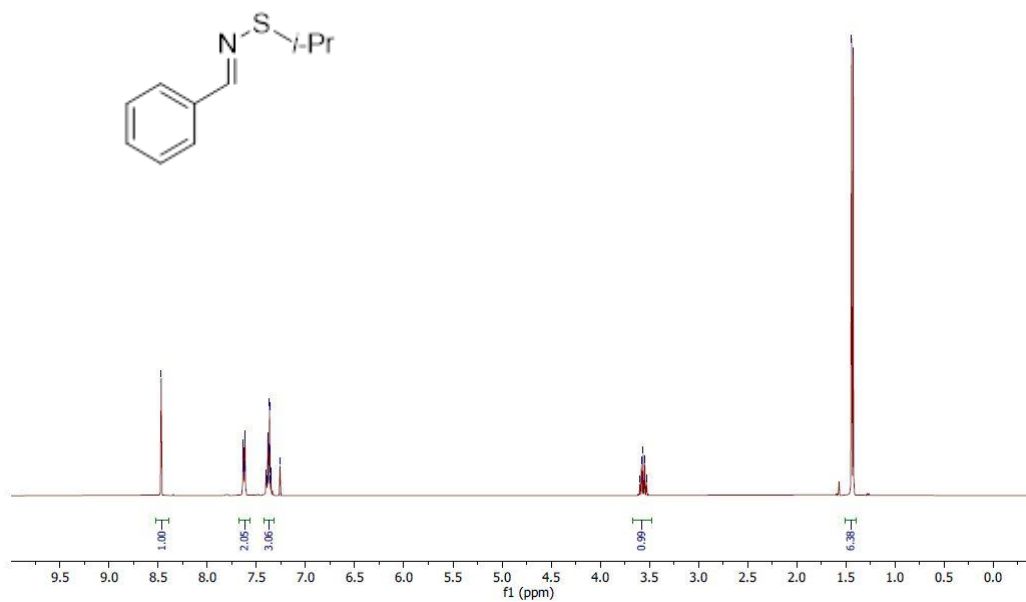

c0924jdj  
Jason Li - LIC-230-S

156.1

136.8

129.8  
127.0

77.4  
77.1  
76.8

40.6

21.7

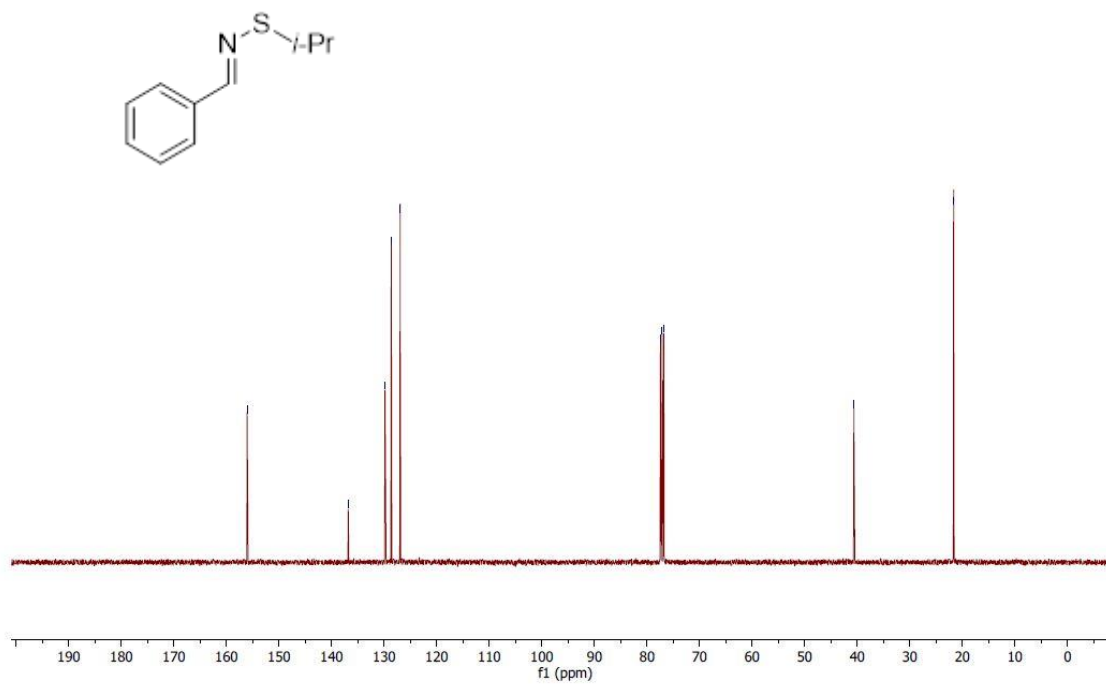

b8635jdj  
Jason Li - UC-277-1

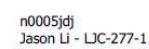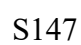

# Data for **6c-iPr**

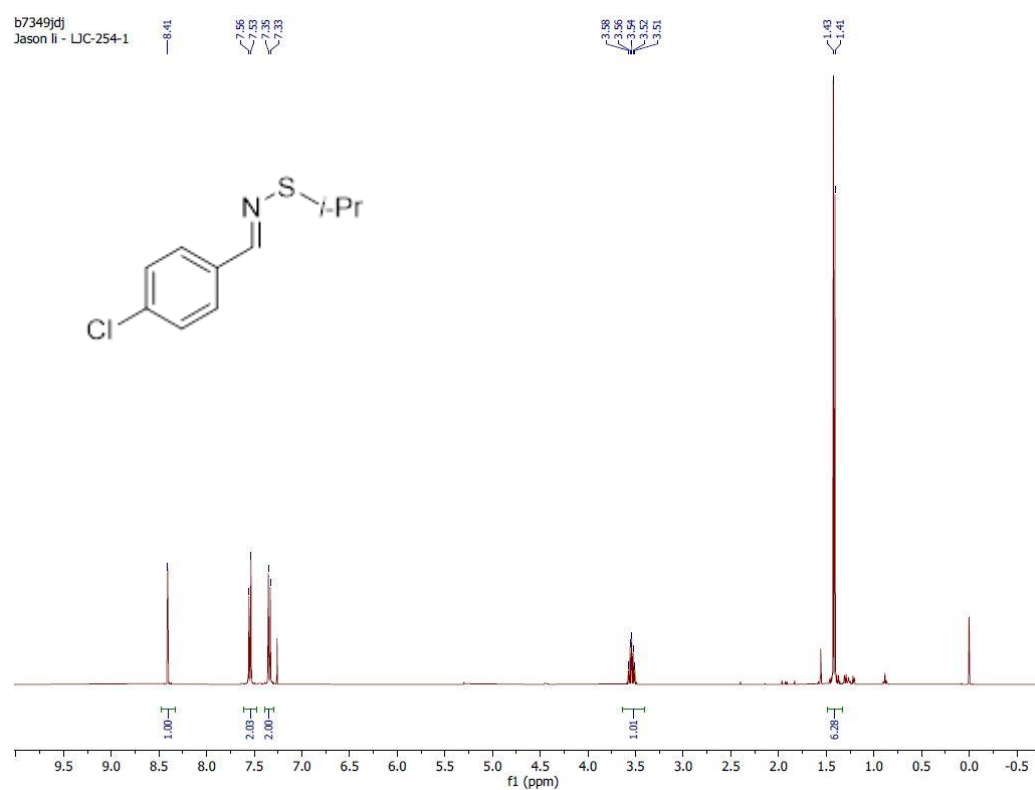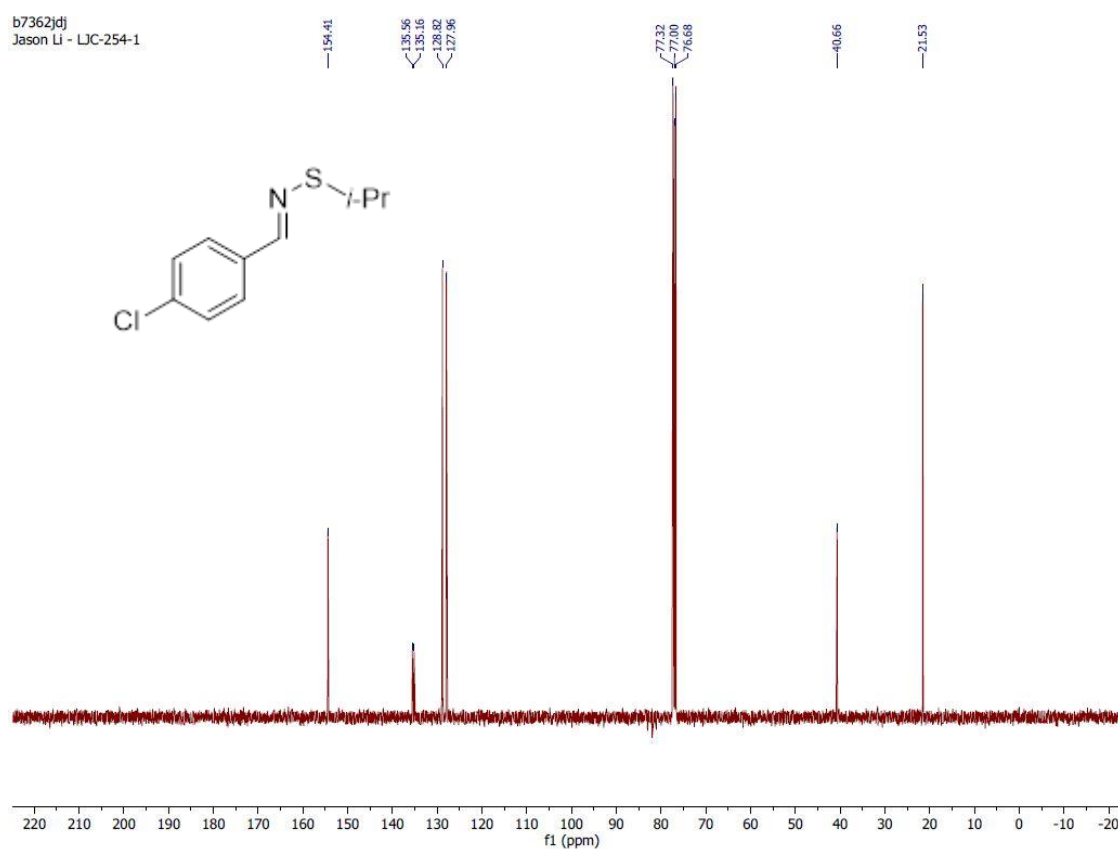



# Data for **6d-iPr**

b8643jdj  
Jason Li - LIC-277-2-2

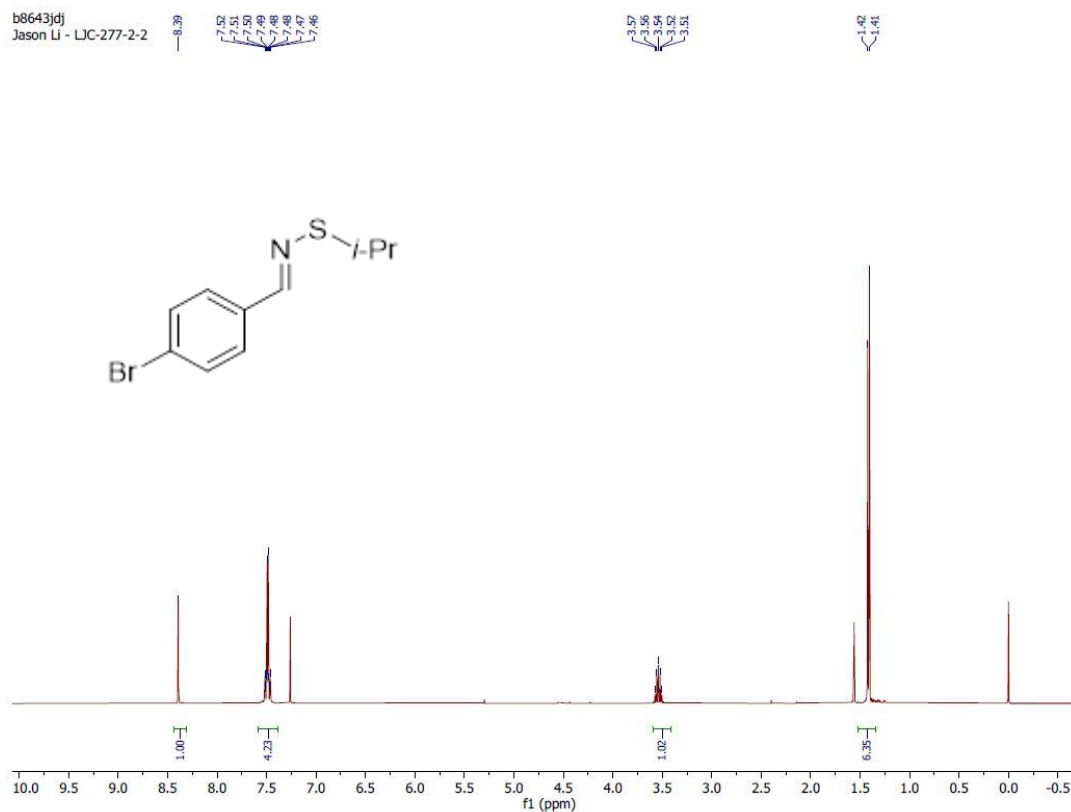

n0006jdj  
Jason Li - LIC-277-2-2

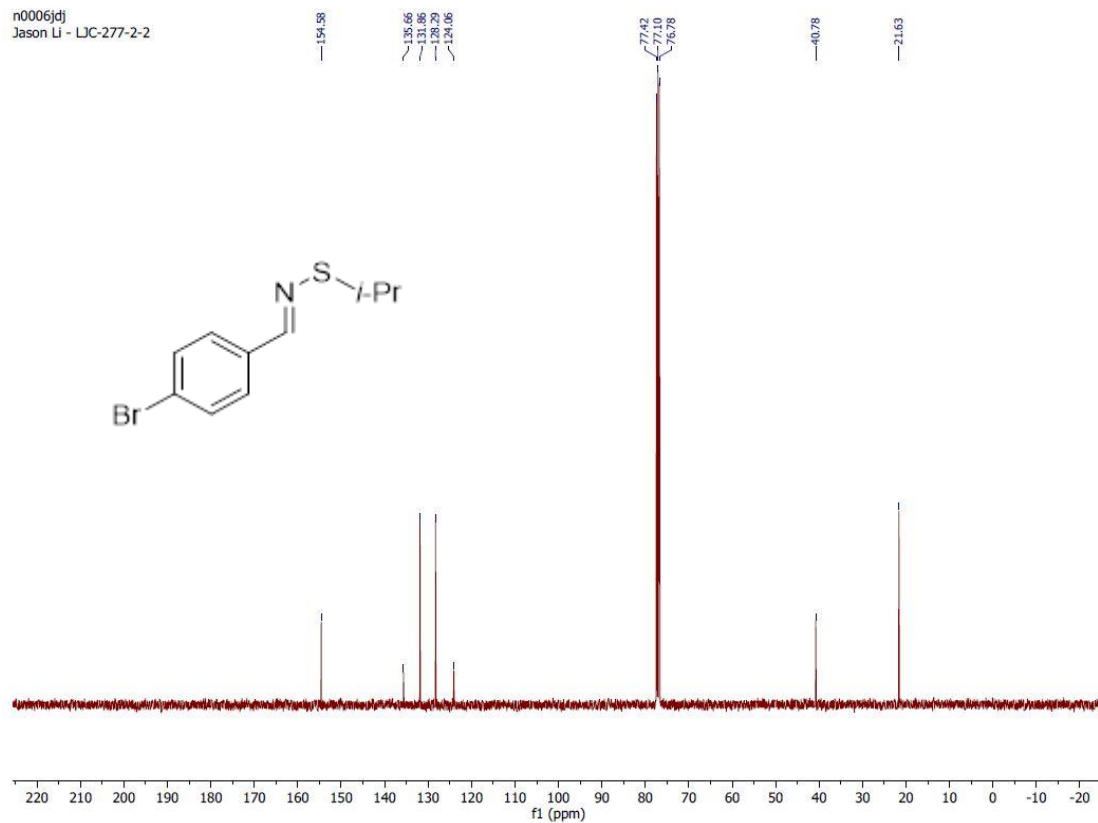

# Data for **6e-*i*Pr**

b8567jdj  
Jason Li - LIC-275-1

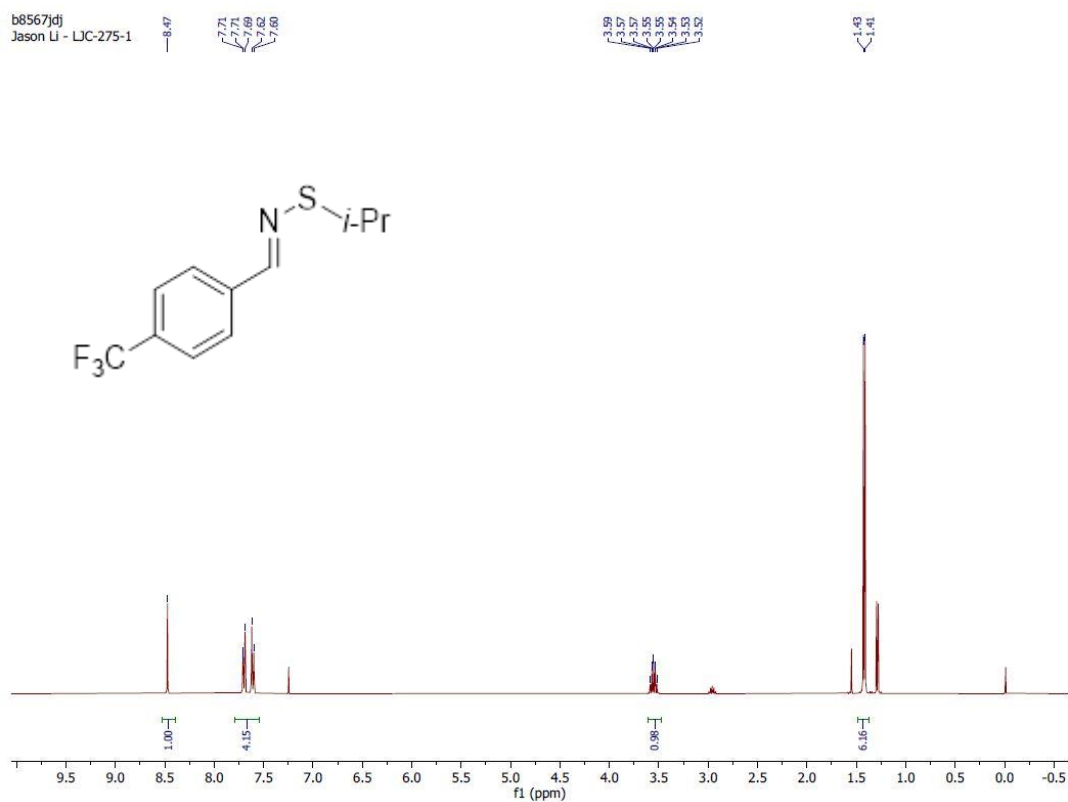

m9941jdj  
Jason Li - LIC-275-1

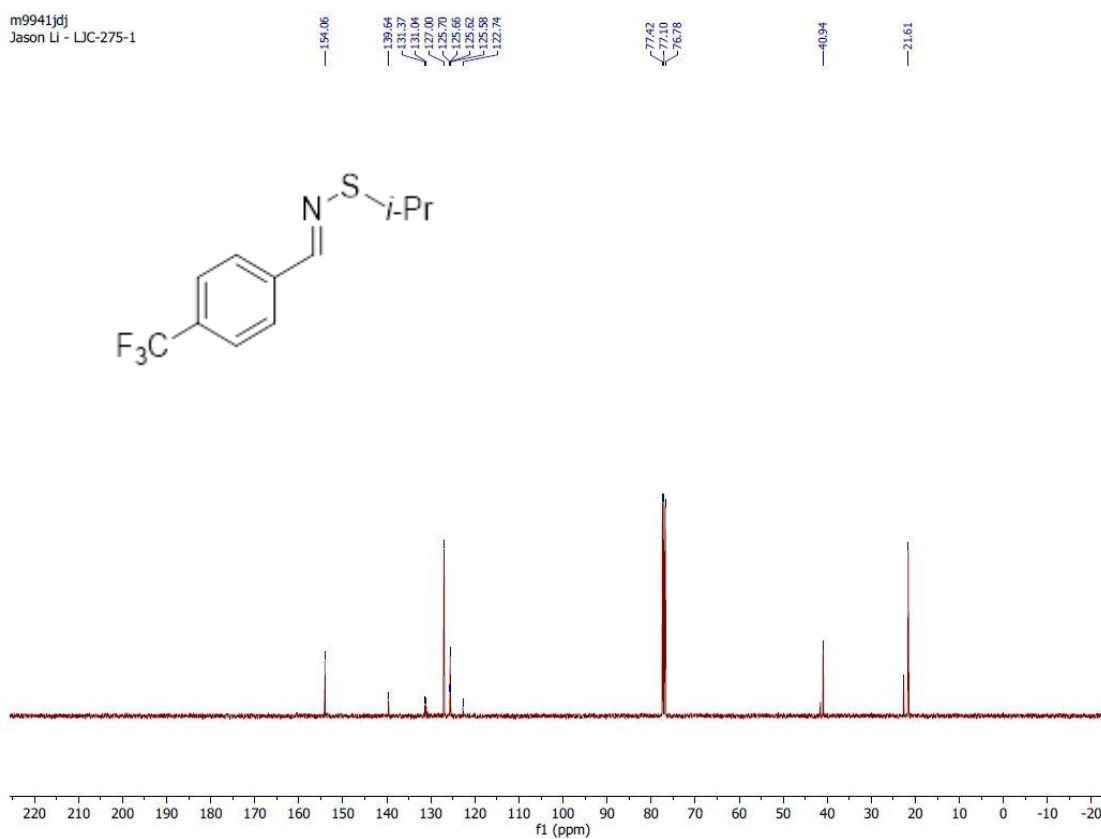

# Data for **6f-iPr**

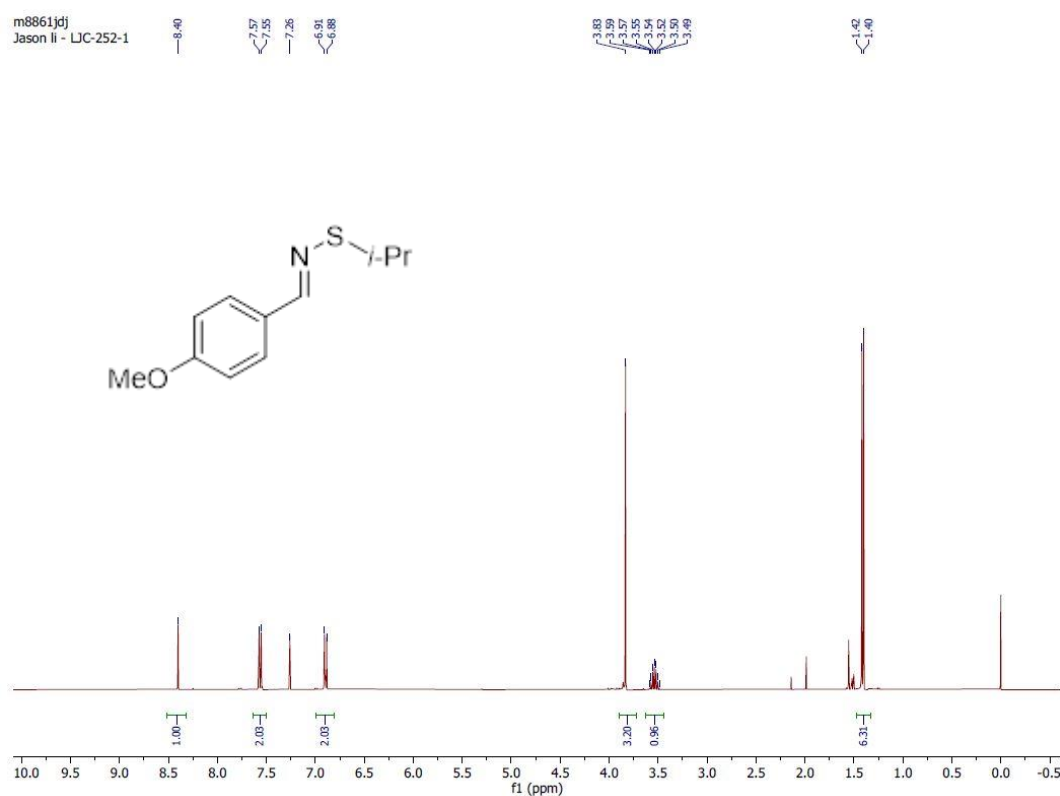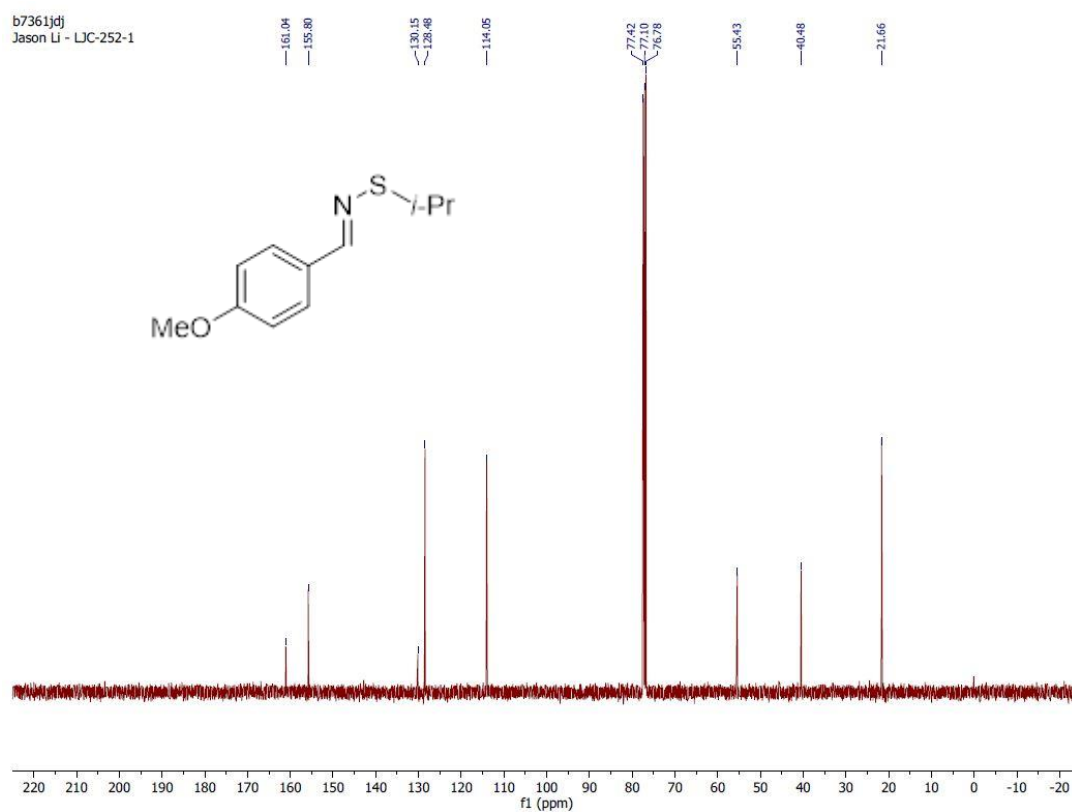

# Data for **6g-*i*Pr**

b8572dj  
Jason Li - LJC-274-1

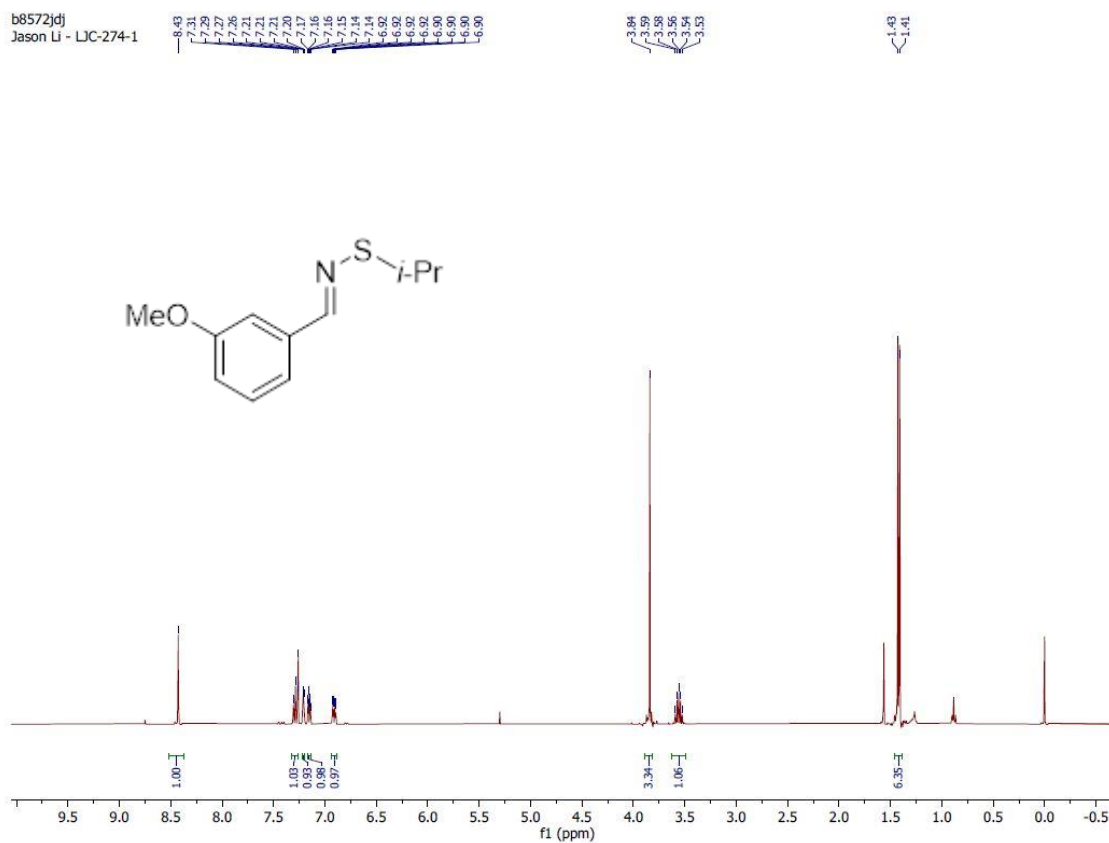

b8572dj  
Jason Li - LJC-274-1

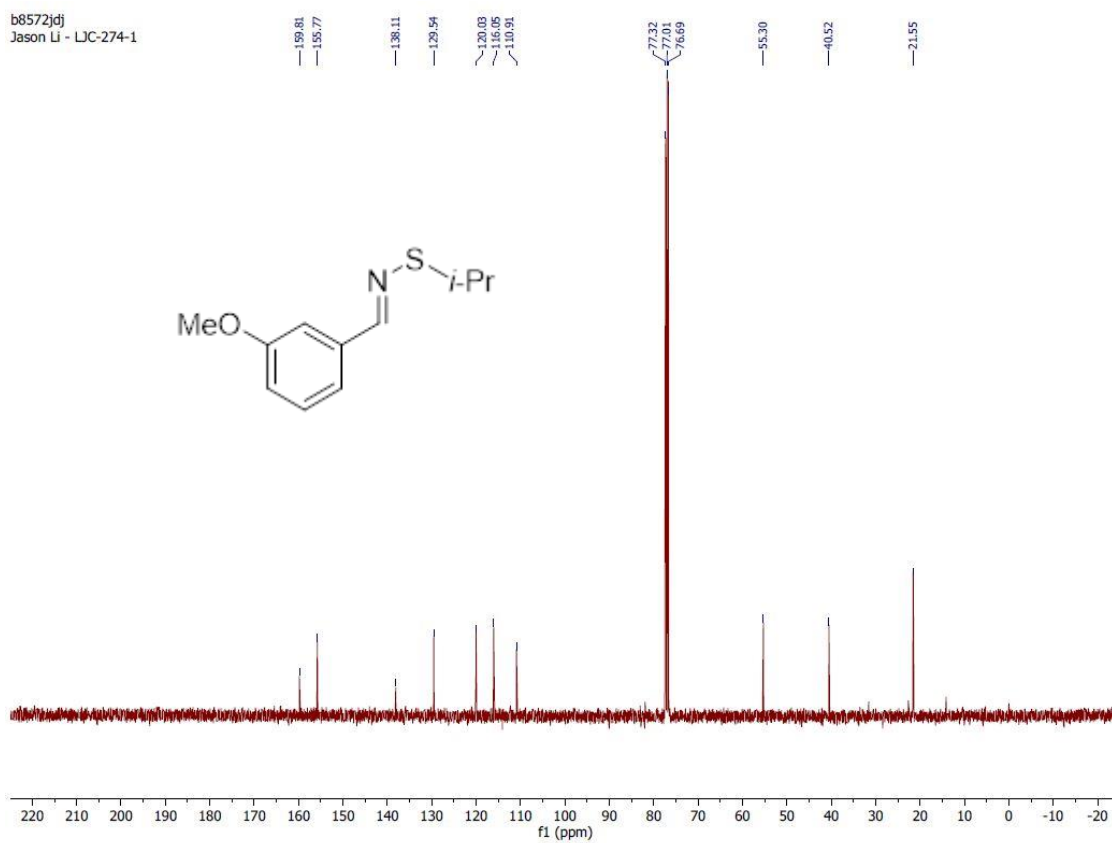

# Data for **6h-iPr**

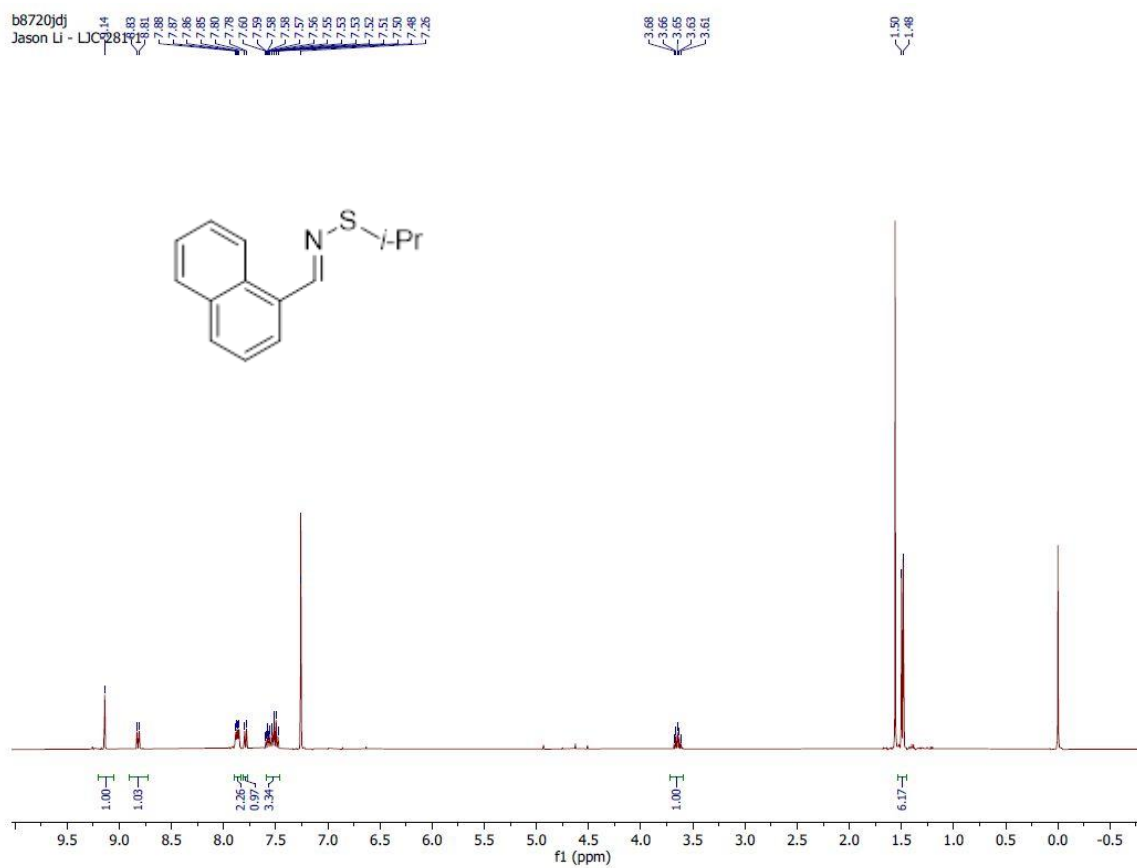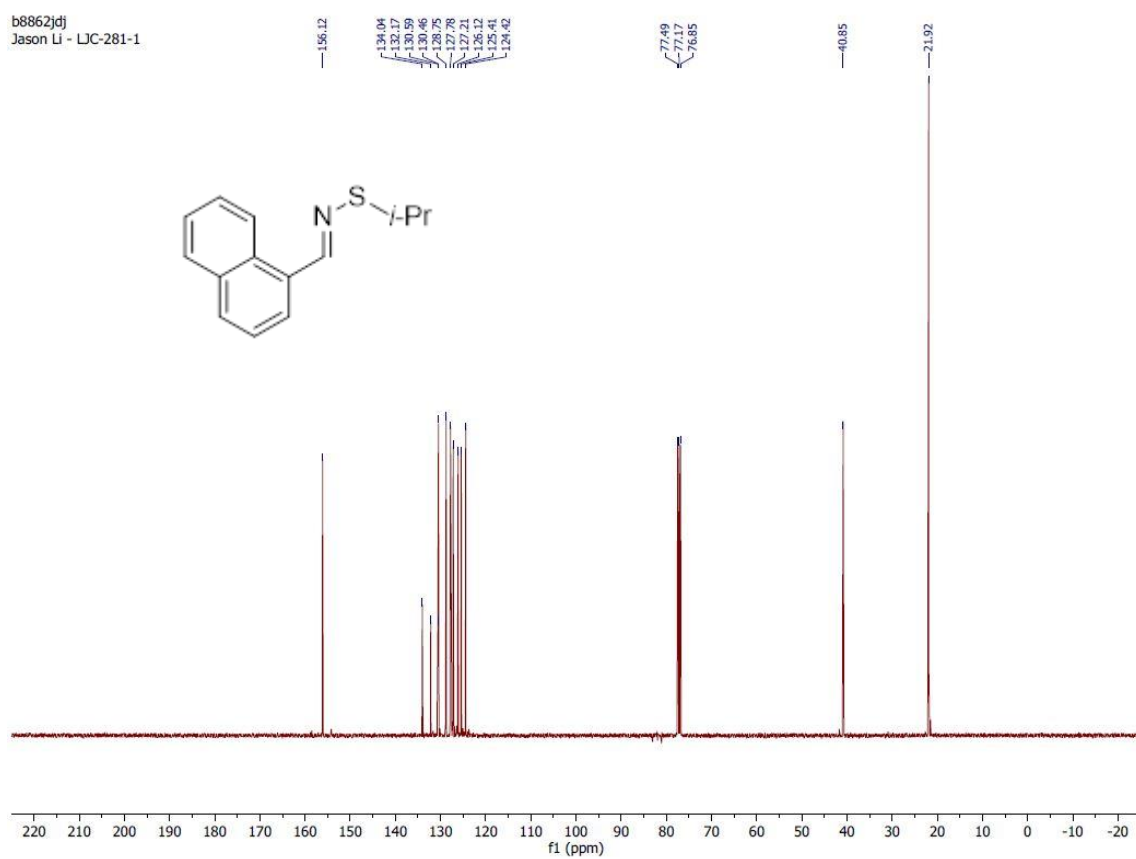

b7734jdj  
Jason Li - LIC-2601

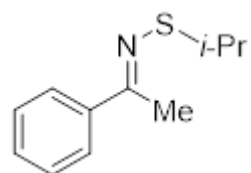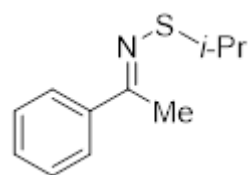

|          |          |          |          |          |          |          |          |          |          |          |          |          |          |          |          |          |          |          |          |          |          |          |          |          |          |          |          |          |          |          |          |          |          |          |          |          |          |          |          |          |          |          |          |          |          |          |          |          |          |          |          |          |          |          |          |          |          |          |          |          |          |          |          |          |          |          |          |          |          |          |          |          |          |          |          |          |          |          |          |          |          |          |          |          |          |          |          |          |          |          |          |          |          |          |          |          |          |          |          |          |          |          |          |          |          |          |          |          |          |          |          |          |          |          |          |          |          |          |          |          |          |          |          |          |          |          |          |          |          |          |          |          |          |          |          |          |          |          |          |          |          |          |          |          |          |          |          |          |          |          |          |          |          |          |          |          |          |          |          |          |          |          |          |          |          |          |          |          |          |          |          |          |          |          |          |          |          |          |          |          |          |          |          |          |          |          |          |          |          |          |          |          |          |          |          |          |          |          |          |          |          |          |          |          |          |          |          |          |          |          |          |          |          |          |          |          |          |          |          |          |          |          |          |          |          |          |          |          |          |          |          |          |          |          |          |          |          |          |          |          |          |          |          |          |          |          |          |          |          |          |          |          |          |          |          |          |          |          |          |          |          |          |          |          |          |          |          |          |          |          |          |          |          |          |          |          |          |          |          |          |          |          |          |          |          |          |          |          |          |          |          |          |          |          |          |          |          |          |          |          |          |          |          |          |          |          |          |          |          |          |          |          |          |     |
|----------|----------|----------|----------|----------|----------|----------|----------|----------|----------|----------|----------|----------|----------|----------|----------|----------|----------|----------|----------|----------|----------|----------|----------|----------|----------|----------|----------|----------|----------|----------|----------|----------|----------|----------|----------|----------|----------|----------|----------|----------|----------|----------|----------|----------|----------|----------|----------|----------|----------|----------|----------|----------|----------|----------|----------|----------|----------|----------|----------|----------|----------|----------|----------|----------|----------|----------|----------|----------|----------|----------|----------|----------|----------|----------|----------|----------|----------|----------|----------|----------|----------|----------|----------|----------|----------|----------|----------|----------|----------|----------|----------|----------|----------|----------|----------|----------|----------|----------|----------|----------|----------|----------|----------|----------|----------|----------|----------|----------|----------|----------|----------|----------|----------|----------|----------|----------|----------|----------|----------|----------|----------|----------|----------|----------|----------|----------|----------|----------|----------|----------|----------|----------|----------|----------|----------|----------|----------|----------|----------|----------|----------|----------|----------|----------|----------|----------|----------|----------|----------|----------|----------|----------|----------|----------|----------|----------|----------|----------|----------|----------|----------|----------|----------|----------|----------|----------|----------|----------|----------|----------|----------|----------|----------|----------|----------|----------|----------|----------|----------|----------|----------|----------|----------|----------|----------|----------|----------|----------|----------|----------|----------|----------|----------|----------|----------|----------|----------|----------|----------|----------|----------|----------|----------|----------|----------|----------|----------|----------|----------|----------|----------|----------|----------|----------|----------|----------|----------|----------|----------|----------|----------|----------|----------|----------|----------|----------|----------|----------|----------|----------|----------|----------|----------|----------|----------|----------|----------|----------|----------|----------|----------|----------|----------|----------|----------|----------|----------|----------|----------|----------|----------|----------|----------|----------|----------|----------|----------|----------|----------|----------|----------|----------|----------|----------|----------|----------|----------|----------|----------|----------|----------|----------|----------|----------|----------|----------|----------|----------|----------|----------|----------|----------|----------|----------|----------|----------|----------|----------|----------|----------|----------|----------|----------|----------|----------|----------|----------|----------|----------|----------|----------|----------|----------|----------|----------|----------|----------|----------|----------|----------|----------|----------|----------|-----|
| 06/25/16 | 07/02/16 | 07/09/16 | 07/16/16 | 07/23/16 | 07/30/16 | 08/06/16 | 08/13/16 | 08/20/16 | 08/27/16 | 09/03/16 | 09/10/16 | 09/17/16 | 09/24/16 | 10/01/16 | 10/08/16 | 10/15/16 | 10/22/16 | 10/29/16 | 11/05/16 | 11/12/16 | 11/19/16 | 11/26/16 | 12/03/16 | 12/10/16 | 12/17/16 | 12/24/16 | 12/31/16 | 01/07/17 | 01/14/17 | 01/21/17 | 01/28/17 | 02/04/17 | 02/11/17 | 02/18/17 | 02/25/17 | 03/04/17 | 03/11/17 | 03/18/17 | 03/25/17 | 04/01/17 | 04/08/17 | 04/15/17 | 04/22/17 | 04/29/17 | 05/06/17 | 05/13/17 | 05/20/17 | 05/27/17 | 06/03/17 | 06/10/17 | 06/17/17 | 06/24/17 | 07/01/17 | 07/08/17 | 07/15/17 | 07/22/17 | 07/29/17 | 08/05/17 | 08/12/17 | 08/19/17 | 08/26/17 | 09/02/17 | 09/09/17 | 09/16/17 | 09/23/17 | 09/30/17 | 10/07/17 | 10/14/17 | 10/21/17 | 10/28/17 | 11/04/17 | 11/11/17 | 11/18/17 | 11/25/17 | 12/02/17 | 12/09/17 | 12/16/17 | 12/23/17 | 12/30/17 | 01/06/18 | 01/13/18 | 01/20/18 | 01/27/18 | 02/03/18 | 02/10/18 | 02/17/18 | 02/24/18 | 03/03/18 | 03/10/18 | 03/17/18 | 03/24/18 | 03/31/18 | 04/07/18 | 04/14/18 | 04/21/18 | 04/28/18 | 05/05/18 | 05/12/18 | 05/19/18 | 05/26/18 | 06/02/18 | 06/09/18 | 06/16/18 | 06/23/18 | 06/30/18 | 07/07/18 | 07/14/18 | 07/21/18 | 07/28/18 | 08/04/18 | 08/11/18 | 08/18/18 | 08/25/18 | 09/01/18 | 09/08/18 | 09/15/18 | 09/22/18 | 09/29/18 | 10/06/18 | 10/13/18 | 10/20/18 | 10/27/18 | 11/03/18 | 11/10/18 | 11/17/18 | 11/24/18 | 12/01/18 | 12/08/18 | 12/15/18 | 12/22/18 | 12/29/18 | 01/05/19 | 01/12/19 | 01/19/19 | 01/26/19 | 02/02/19 | 02/09/19 | 02/16/19 | 02/23/19 | 03/02/19 | 03/09/19 | 03/16/19 | 03/23/19 | 03/30/19 | 04/06/19 | 04/13/19 | 04/20/19 | 04/27/19 | 05/04/19 | 05/11/19 | 05/18/19 | 05/25/19 | 06/01/19 | 06/08/19 | 06/15/19 | 06/22/19 | 06/29/19 | 07/06/19 | 07/13/19 | 07/20/19 | 07/27/19 | 08/03/19 | 08/10/19 | 08/17/19 | 08/24/19 | 08/31/19 | 09/07/19 | 09/14/19 | 09/21/19 | 09/28/19 | 10/05/19 | 10/12/19 | 10/19/19 | 10/26/19 | 11/02/19 | 11/09/19 | 11/16/19 | 11/23/19 | 11/30/19 | 12/07/19 | 12/14/19 | 12/21/19 | 12/28/19 | 01/04/20 | 01/11/20 | 01/18/20 | 01/25/20 | 02/01/20 | 02/08/20 | 02/15/20 | 02/22/20 | 03/01/20 | 03/08/20 | 03/15/20 | 03/22/20 | 03/29/20 | 04/05/20 | 04/12/20 | 04/19/20 | 04/26/20 | 05/03/20 | 05/10/20 | 05/17/20 | 05/24/20 | 06/01/20 | 06/08/20 | 06/15/20 | 06/22/20 | 06/29/20 | 07/06/20 | 07/13/20 | 07/20/20 | 07/27/20 | 08/03/20 | 08/10/20 | 08/17/20 | 08/24/20 | 08/31/20 | 09/07/20 | 09/14/20 | 09/21/20 | 09/28/20 | 10/05/20 | 10/12/20 | 10/19/20 | 10/26/20 | 11/02/20 | 11/09/20 | 11/16/20 | 11/23/20 | 11/30/20 | 12/07/20 | 12/14/20 | 12/21/20 | 12/28/20 | 01/04/21 | 01/11/21 | 01/18/21 | 01/25/21 | 02/01/21 | 02/08/21 | 02/15/21 | 02/22/21 | 03/01/21 | 03/08/21 | 03/15/21 | 03/22/21 | 03/29/21 | 04/05/21 | 04/12/21 | 04/19/21 | 04/26/21 | 05/03/21 | 05/10/21 | 05/17/21 | 05/24/21 | 06/01/21 | 06/08/21 | 06/15/21 | 06/22/21 | 06/29/21 | 07/06/21 | 07/13/21 | 07/20/21 | 07/27/21 | 08/03/21 | 08/10/21 | 08/17/21 | 08/24/21 | 08/31/21 | 09/07/21 | 09/14/21 | 09/21/21 | 09/28/21 | 10/05/21 | 10/12/21 | 10/19/21 | 10/26/21 | 11/02/21 | 11/09/21 | 11/16/21 | 11/23/21 | 11/30/21 | 12/07/21 | 12/14/21 | 12/21/21 | 12/28/21 | 01/04/22 | 01/11/22 | 01/18/22 | 01/25/22 | 02/01/22 | 02/08/22 | 02/15/22 | 02/22/22 | 03/01/22 | 03/08/22 | 03/15/22 | 03/22/22 | 03/29/22 | 04/05/22 | 04/12/22 | 04/19/22 | 04/26/22 | 05/03/22 | 05/10/22 | 05/17/22 | 05/24/22 | 06/01/22 | 06/08/22 | 06/15/22 | 06/22/22 | 06/29/22 | 07/ |
|----------|----------|----------|----------|----------|----------|----------|----------|----------|----------|----------|----------|----------|----------|----------|----------|----------|----------|----------|----------|----------|----------|----------|----------|----------|----------|----------|----------|----------|----------|----------|----------|----------|----------|----------|----------|----------|----------|----------|----------|----------|----------|----------|----------|----------|----------|----------|----------|----------|----------|----------|----------|----------|----------|----------|----------|----------|----------|----------|----------|----------|----------|----------|----------|----------|----------|----------|----------|----------|----------|----------|----------|----------|----------|----------|----------|----------|----------|----------|----------|----------|----------|----------|----------|----------|----------|----------|----------|----------|----------|----------|----------|----------|----------|----------|----------|----------|----------|----------|----------|----------|----------|----------|----------|----------|----------|----------|----------|----------|----------|----------|----------|----------|----------|----------|----------|----------|----------|----------|----------|----------|----------|----------|----------|----------|----------|----------|----------|----------|----------|----------|----------|----------|----------|----------|----------|----------|----------|----------|----------|----------|----------|----------|----------|----------|----------|----------|----------|----------|----------|----------|----------|----------|----------|----------|----------|----------|----------|----------|----------|----------|----------|----------|----------|----------|----------|----------|----------|----------|----------|----------|----------|----------|----------|----------|----------|----------|----------|----------|----------|----------|----------|----------|----------|----------|----------|----------|----------|----------|----------|----------|----------|----------|----------|----------|----------|----------|----------|----------|----------|----------|----------|----------|----------|----------|----------|----------|----------|----------|----------|----------|----------|----------|----------|----------|----------|----------|----------|----------|----------|----------|----------|----------|----------|----------|----------|----------|----------|----------|----------|----------|----------|----------|----------|----------|----------|----------|----------|----------|----------|----------|----------|----------|----------|----------|----------|----------|----------|----------|----------|----------|----------|----------|----------|----------|----------|----------|----------|----------|----------|----------|----------|----------|----------|----------|----------|----------|----------|----------|----------|----------|----------|----------|----------|----------|----------|----------|----------|----------|----------|----------|----------|----------|----------|----------|----------|----------|----------|----------|----------|----------|----------|----------|----------|----------|----------|----------|----------|----------|----------|----------|----------|----------|----------|----------|----------|----------|----------|----------|----------|----------|----------|----------|----------|-----|

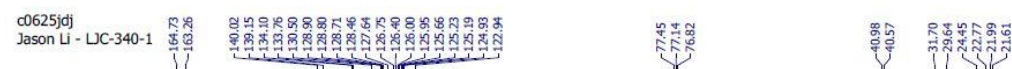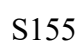

# Data for **6k-iPr**

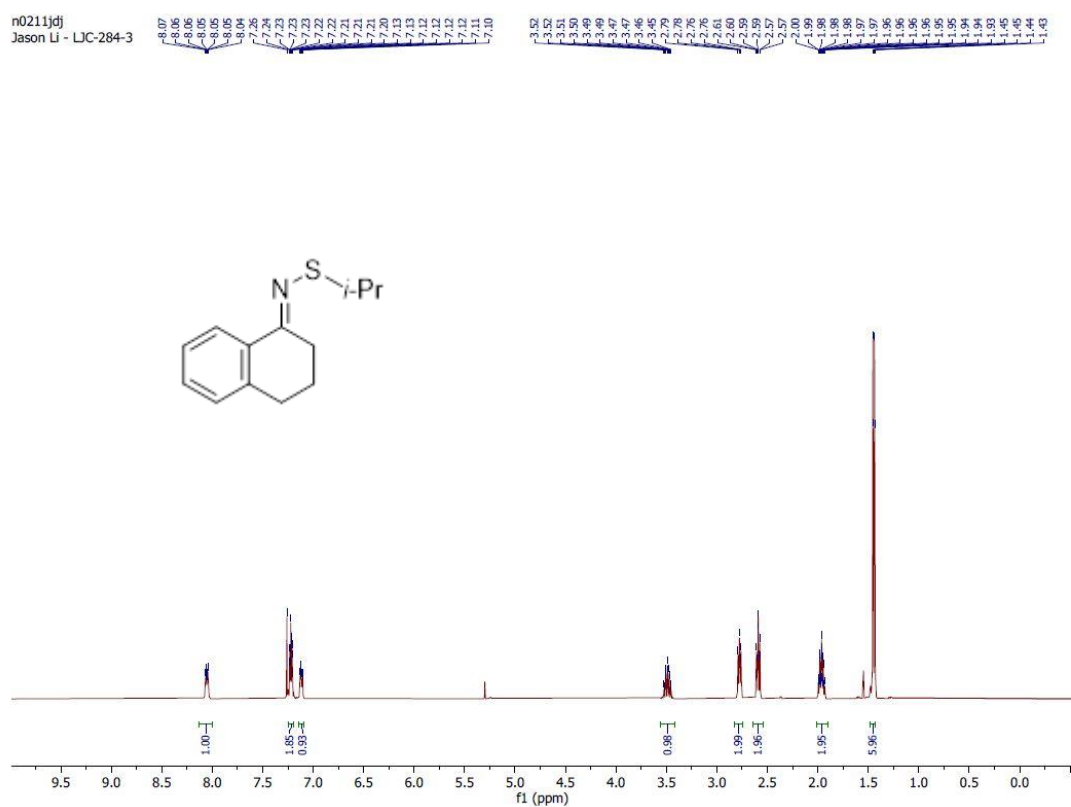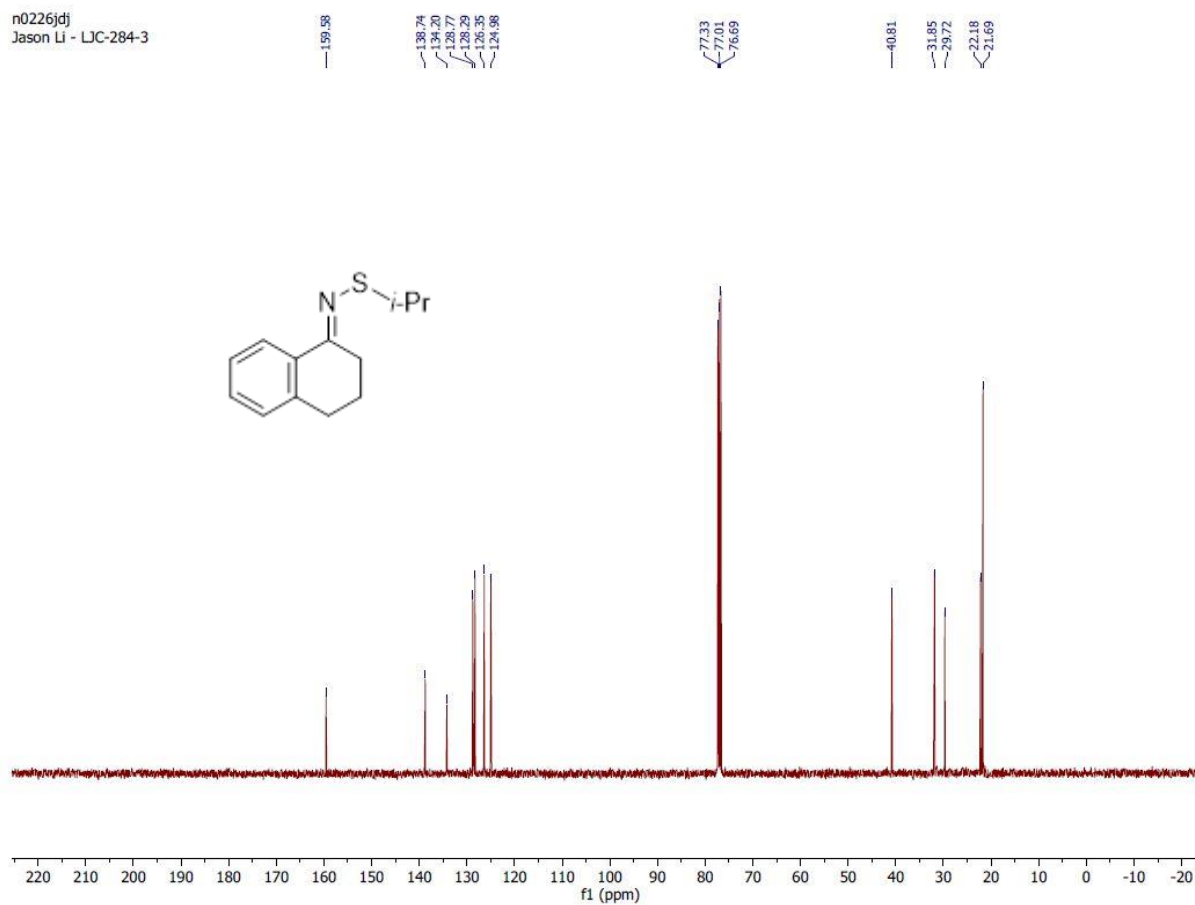



# Data for **6l-iPr**

b7350jdj  
Jason Li - LIC-254-2

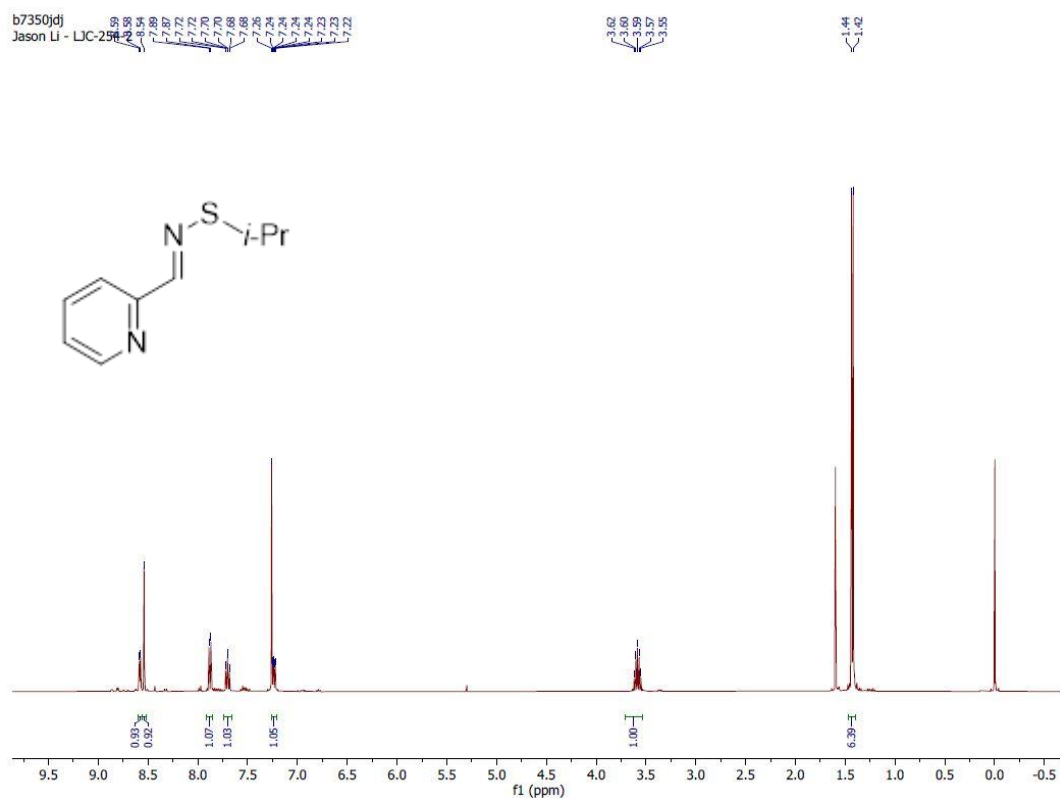

b7363jdj  
Jason Li - LIC-254-2

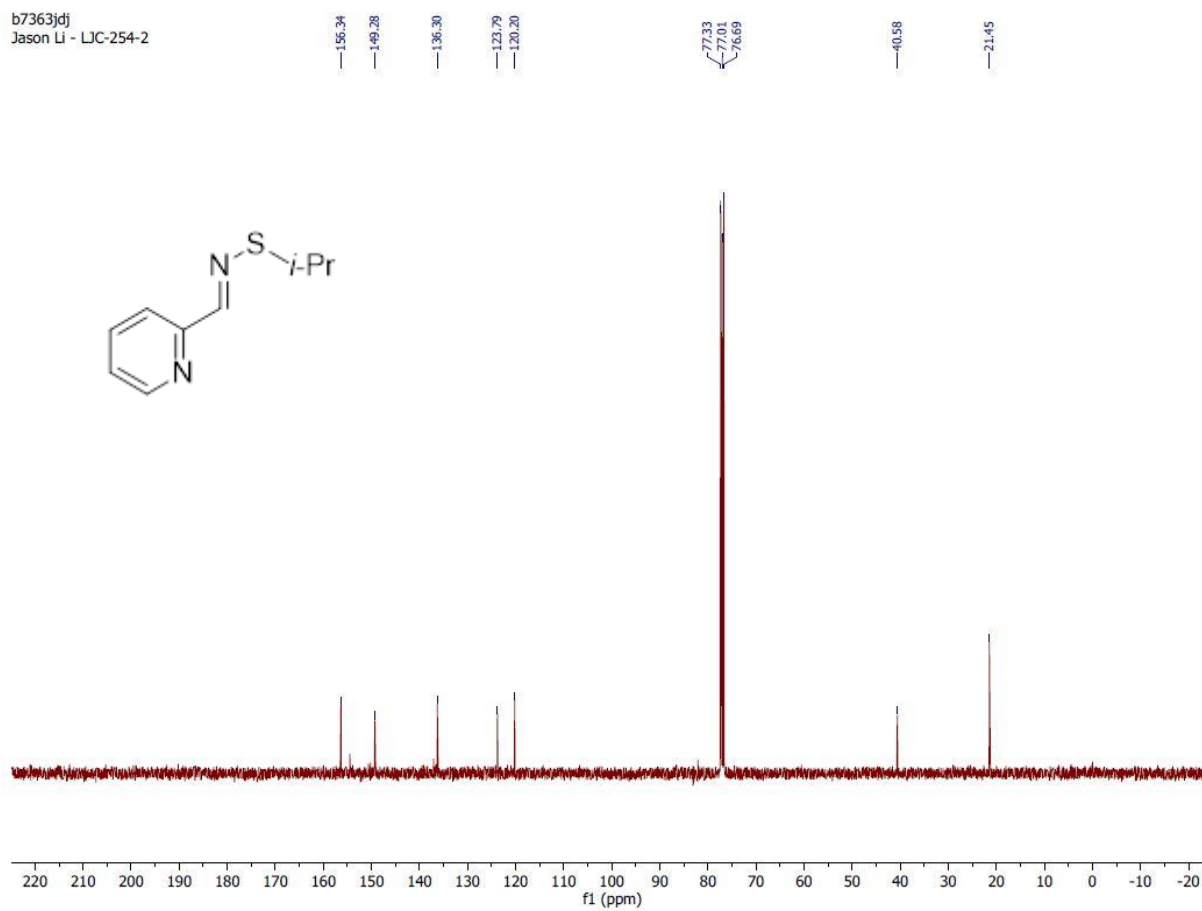

# Data for **6a-*t*Bu**

b6996dj  
Jason Li - LJC-246-2S

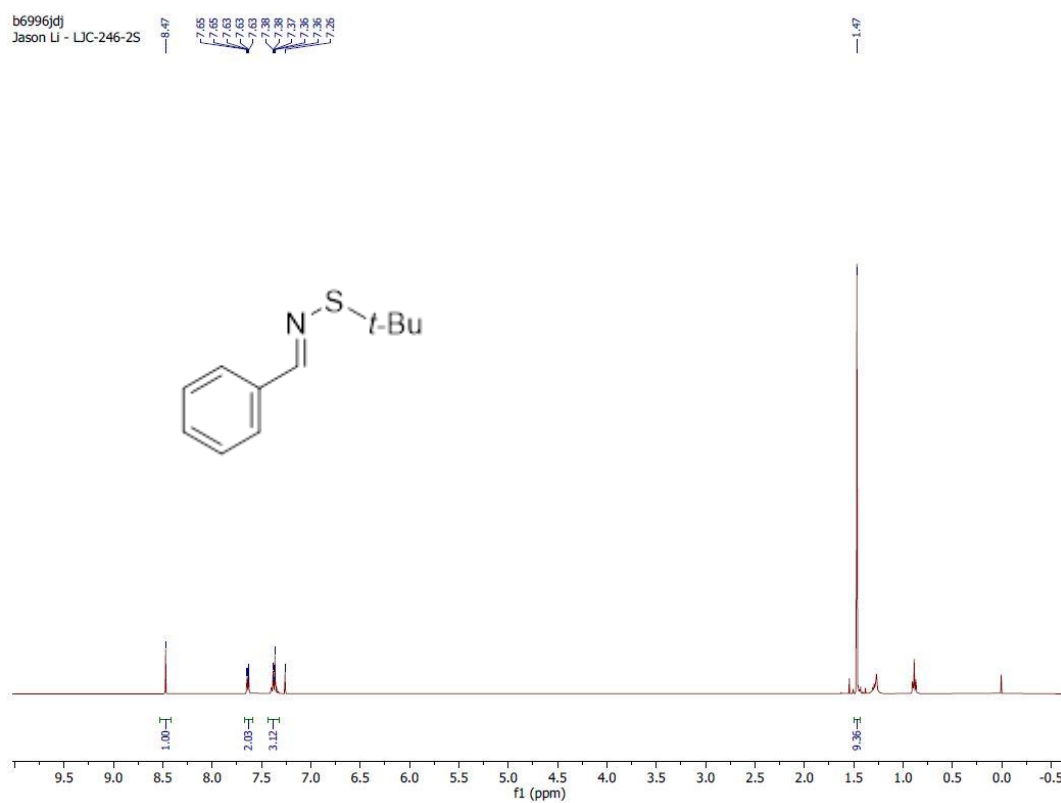

m8578dj  
Jason Li - LJC-246-2S

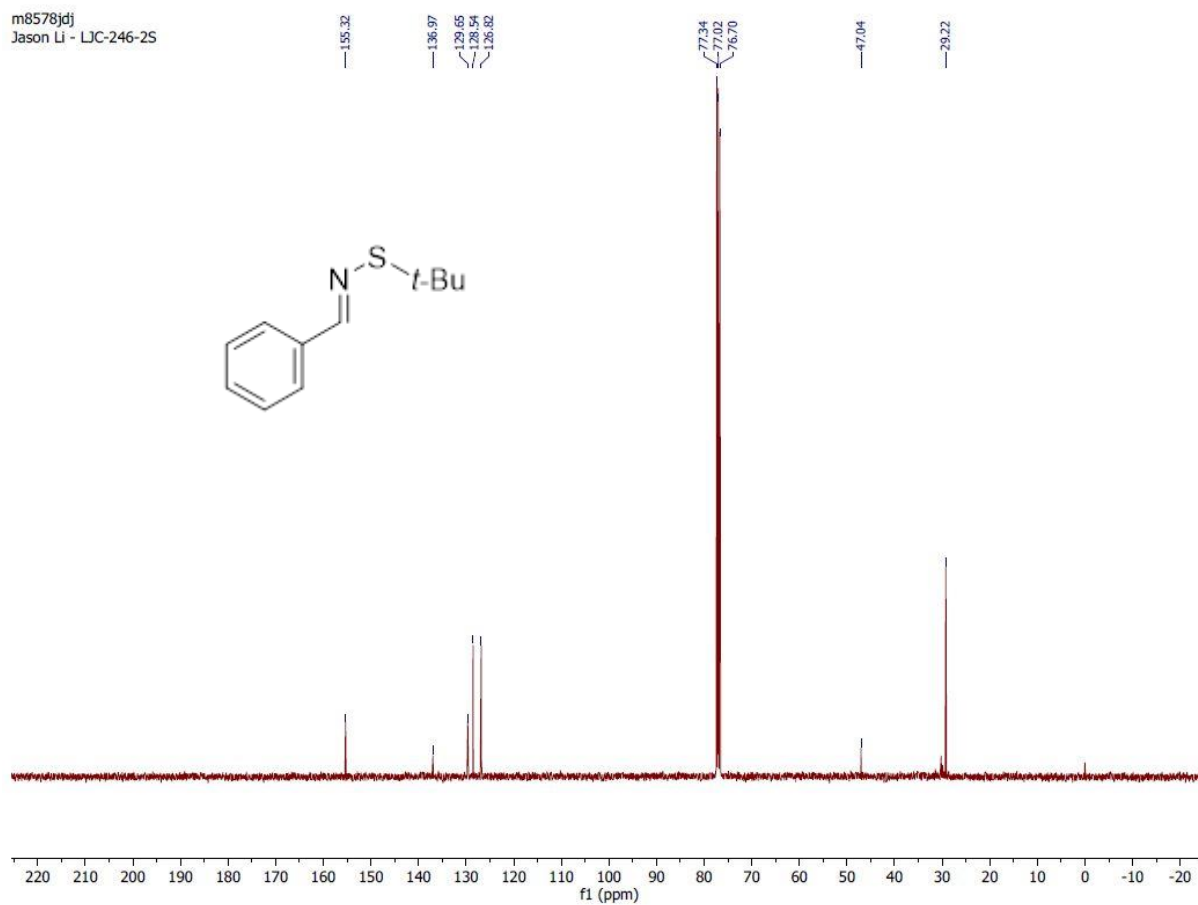

# Data for **6b-*t*Bu**

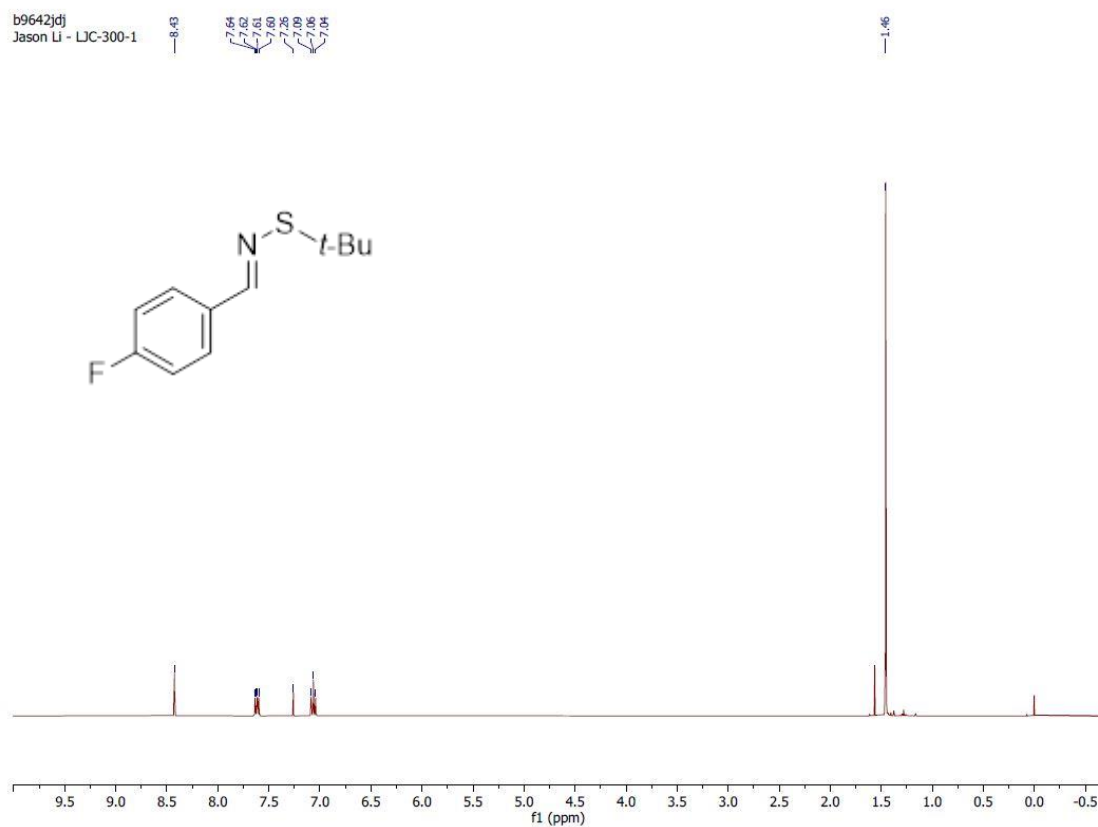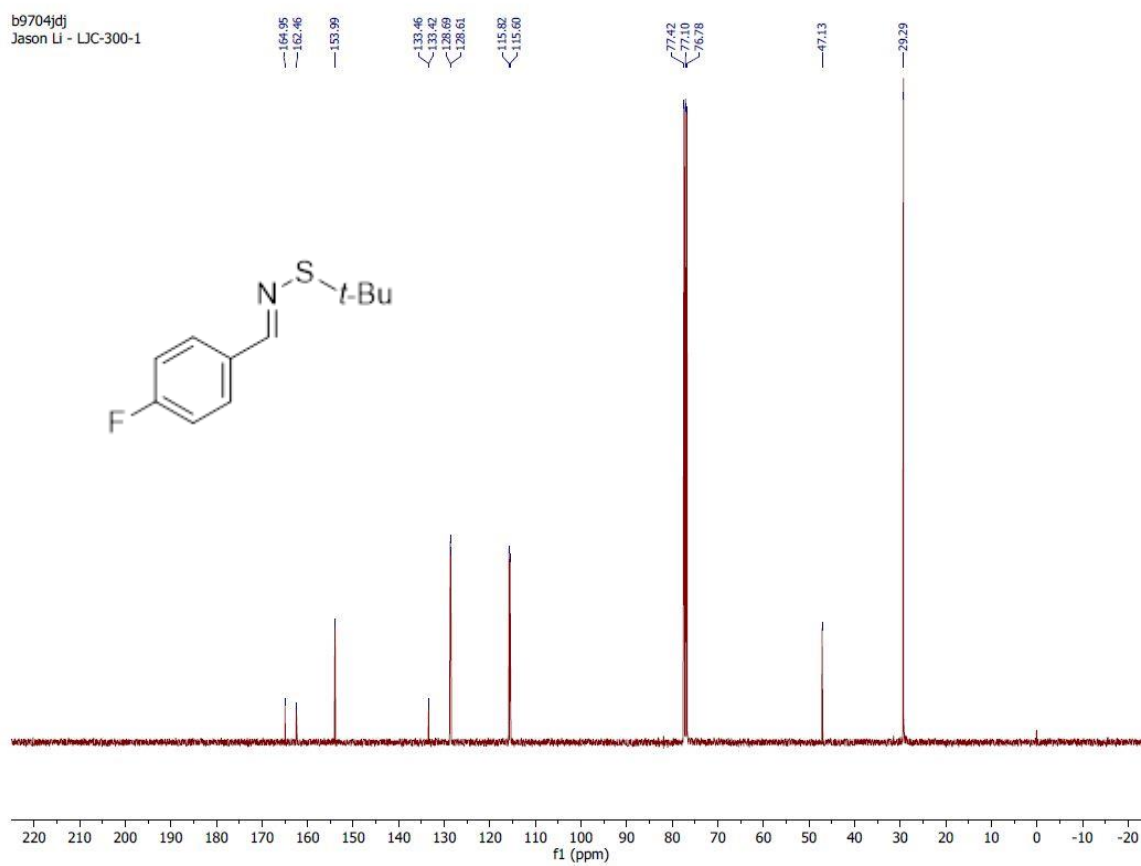

# Data for **6c-*t*Bu**

b9280jdj  
Jason Li - LJC-296-2

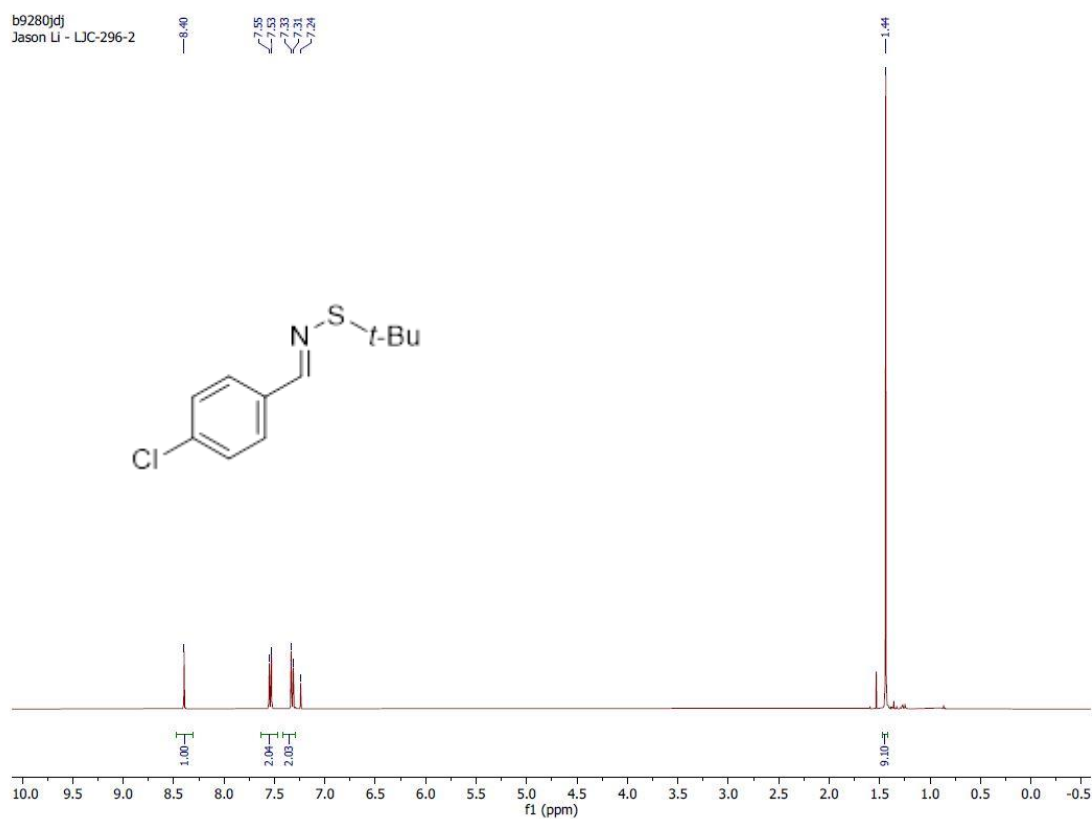

b9280jdj  
Jason Li - LJC-296-2

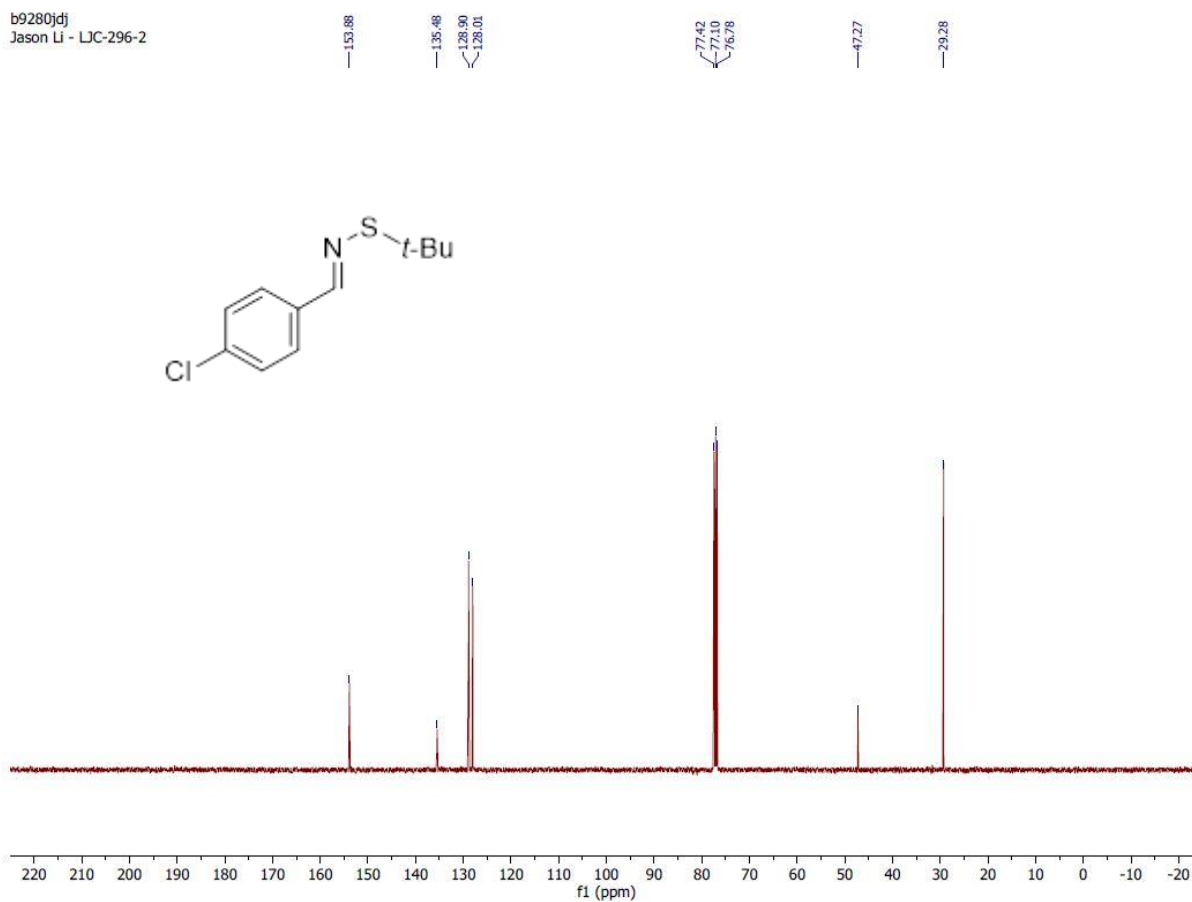

# Data for **6d-tBu**

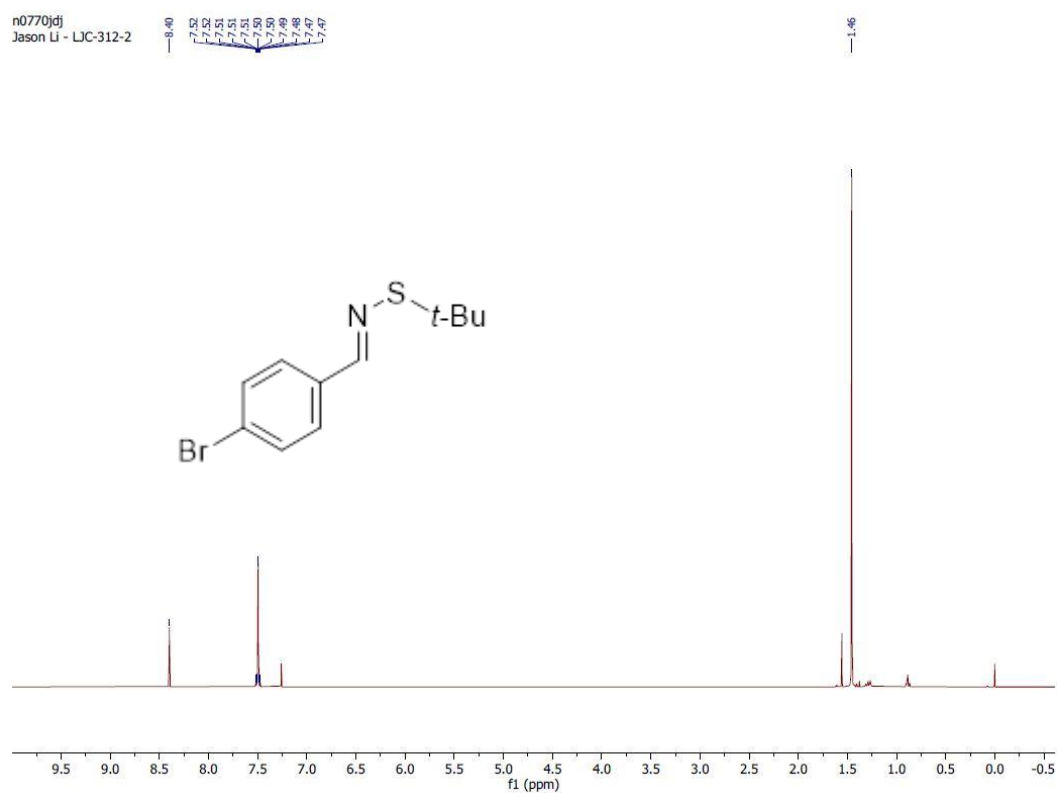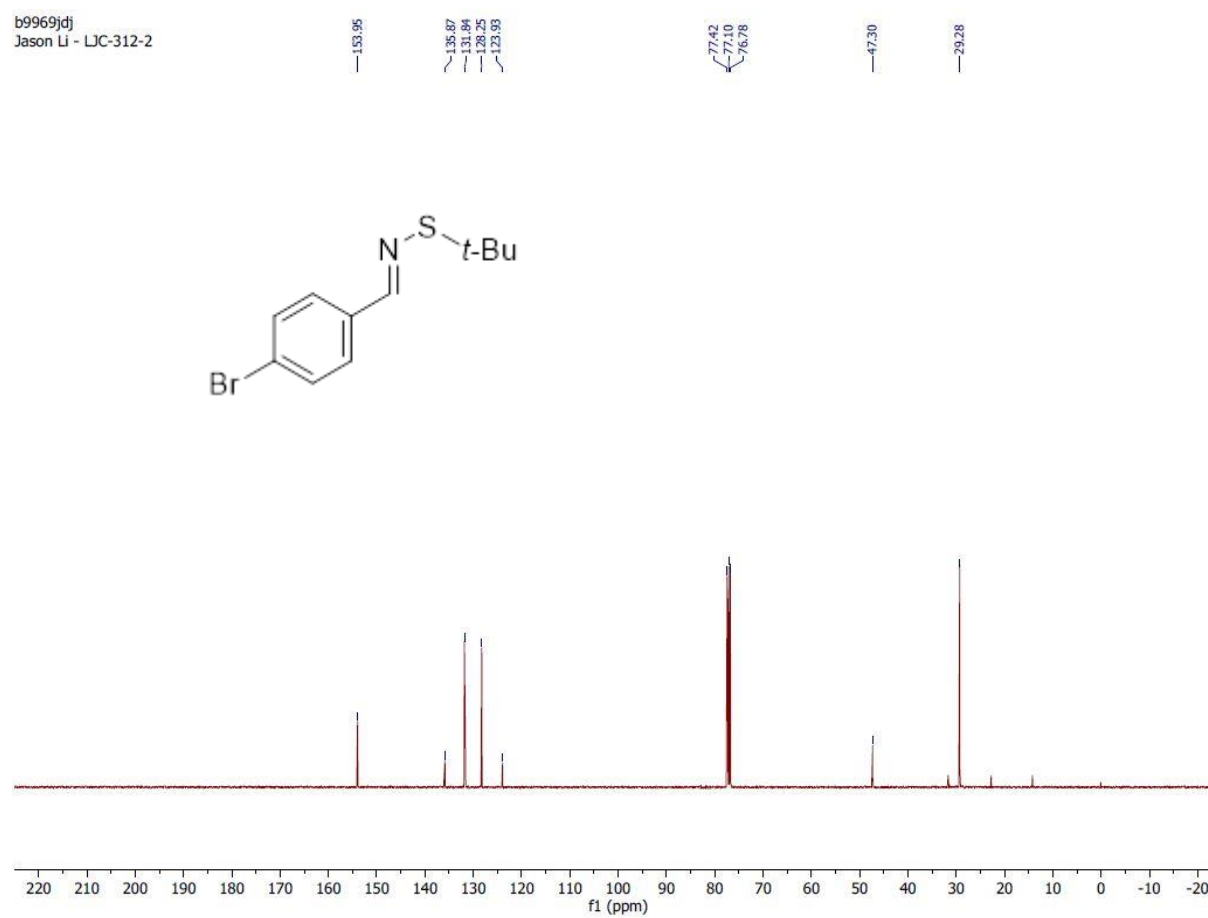

# Data for **6e-*t*Bu**

n0773jdj  
Jason Li - LJC-313-2

7.74  
7.72  
7.64  
7.62  
7.26

1.47

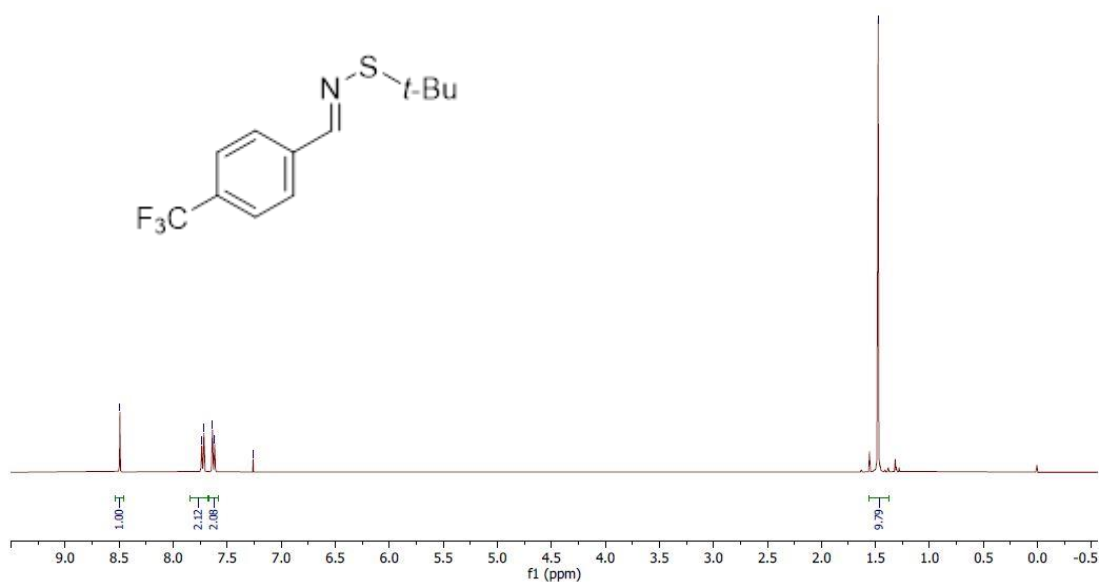

b9970jdj  
Jason Li - LJC-313-2

153.45  
139.85  
131.60  
131.28  
130.96  
128.64  
128.64  
128.68  
125.94  
125.60  
125.56  
125.48  
122.77

77.41  
77.09  
76.78

47.52

29.26

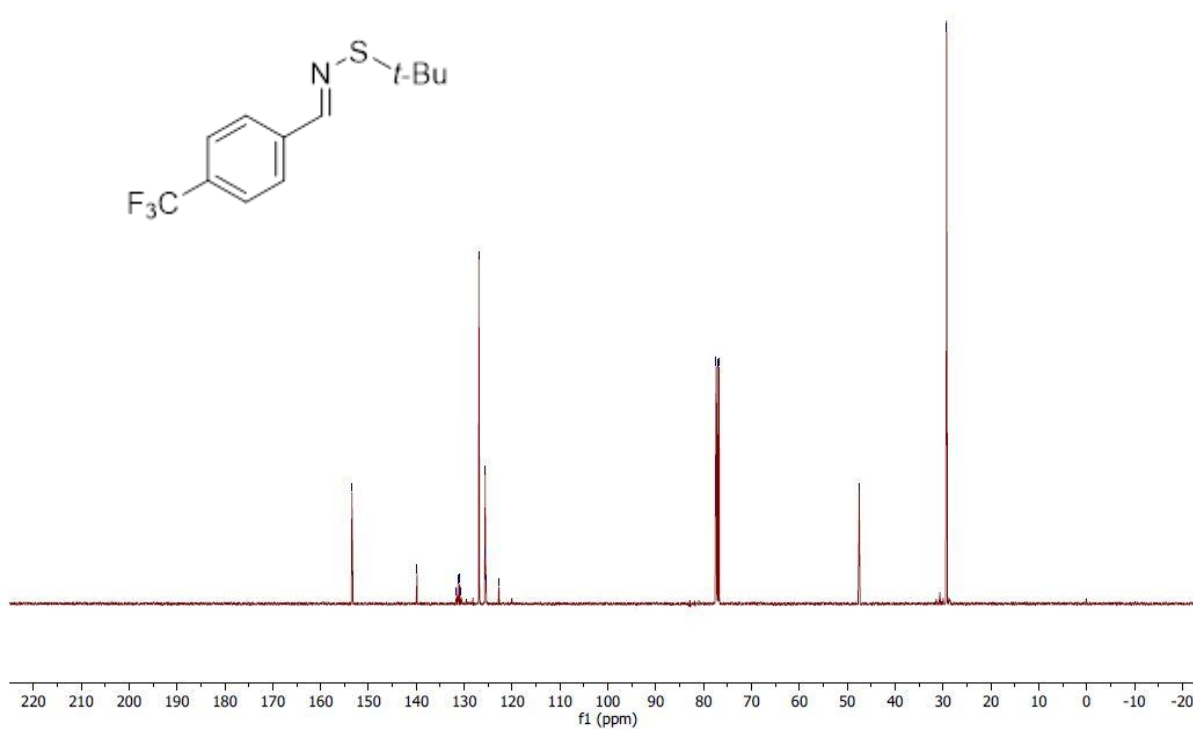

# Data for **6f-tBu**

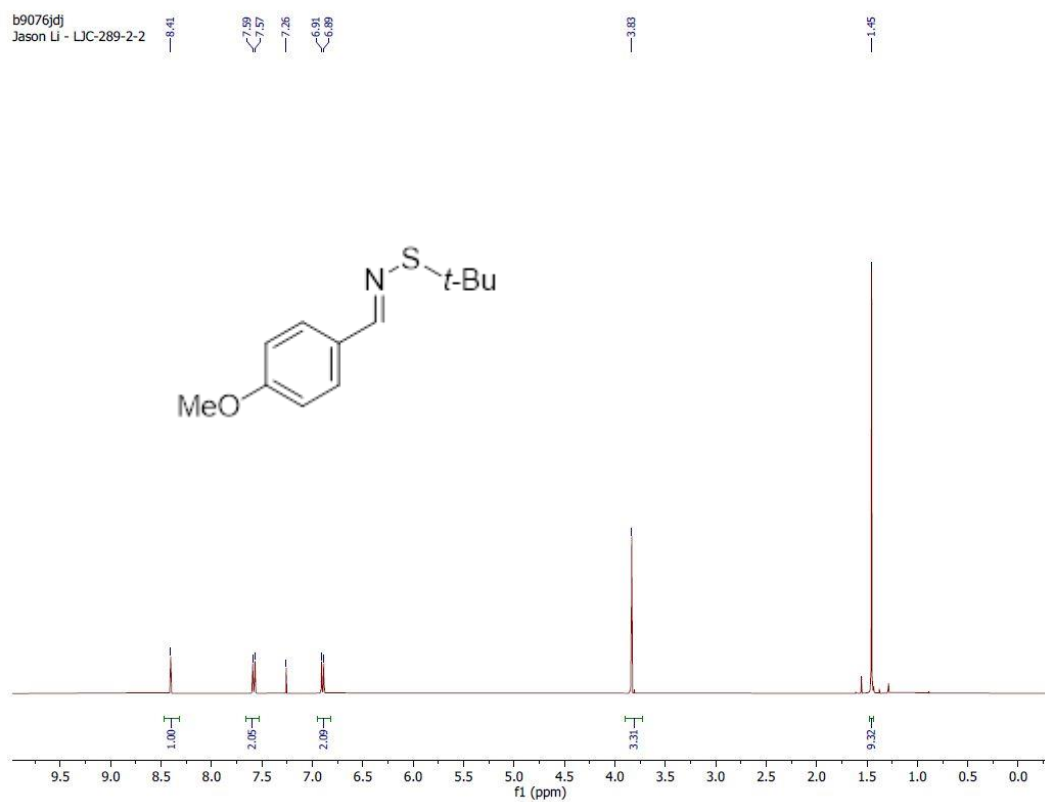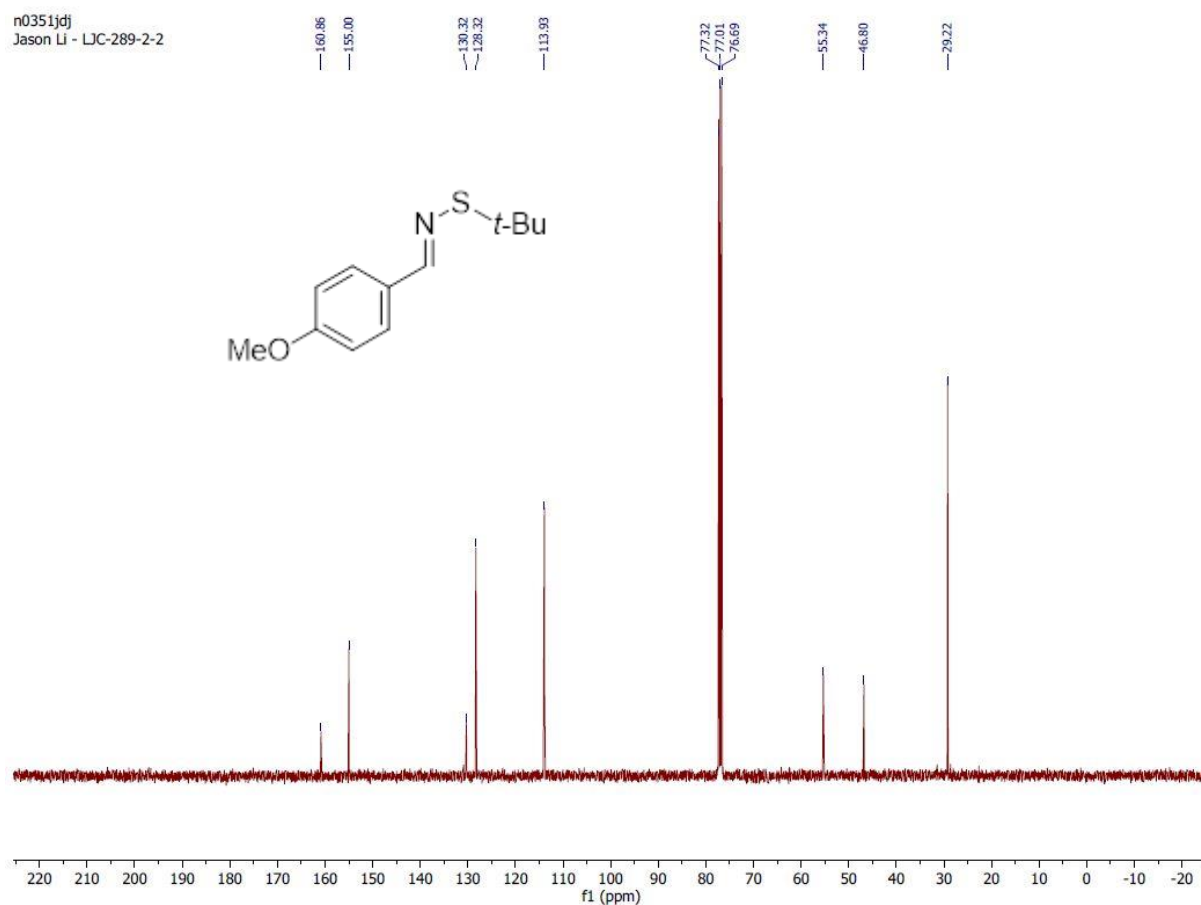

# Data for **6g-*t*Bu**

b9226jdj  
Jason Li - LJC-293-2

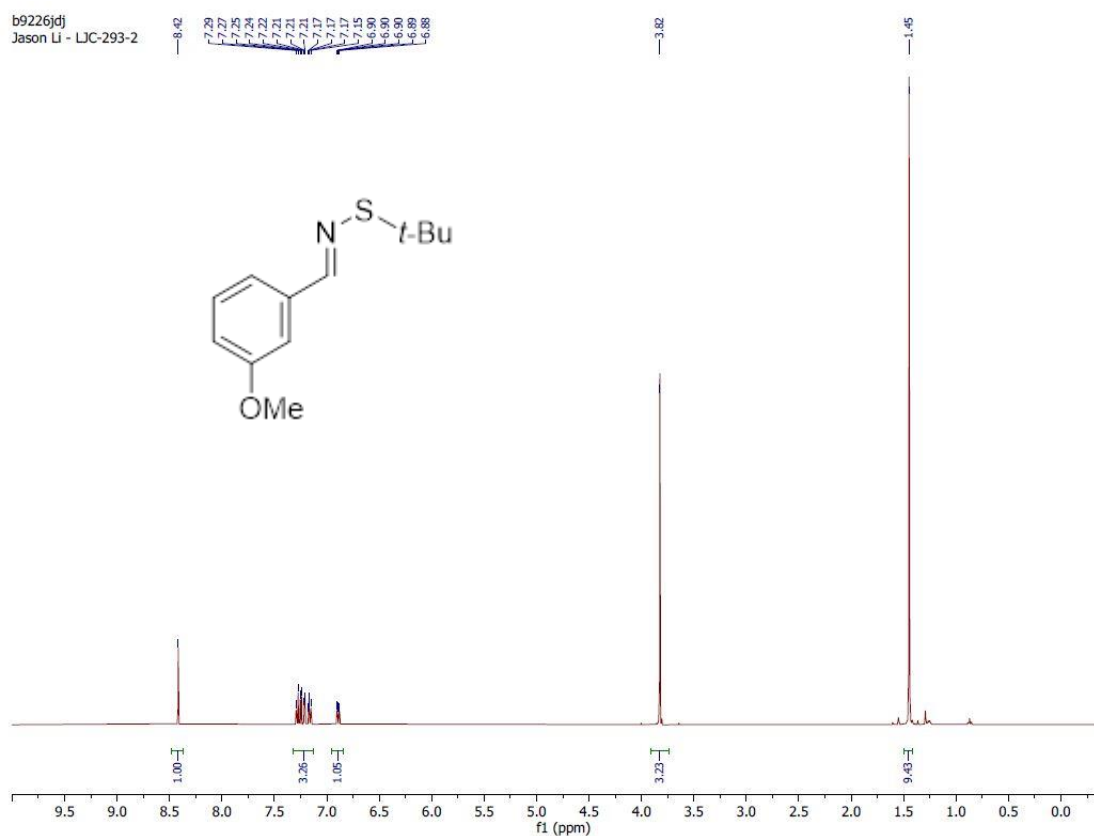

b9226jdj  
Jason Li - LJC-293-2

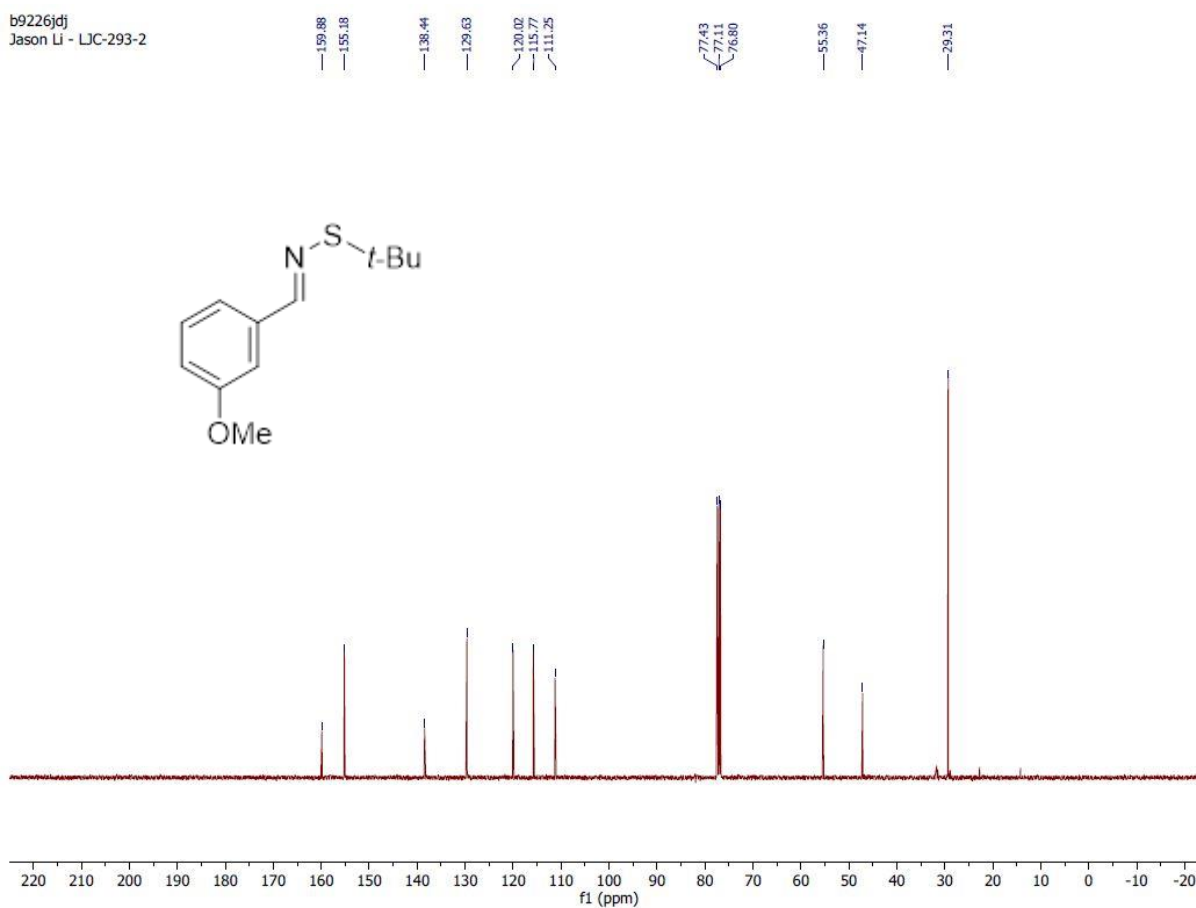



# Data for **6h-*t*Bu**

c0052jdj  
Jason Li

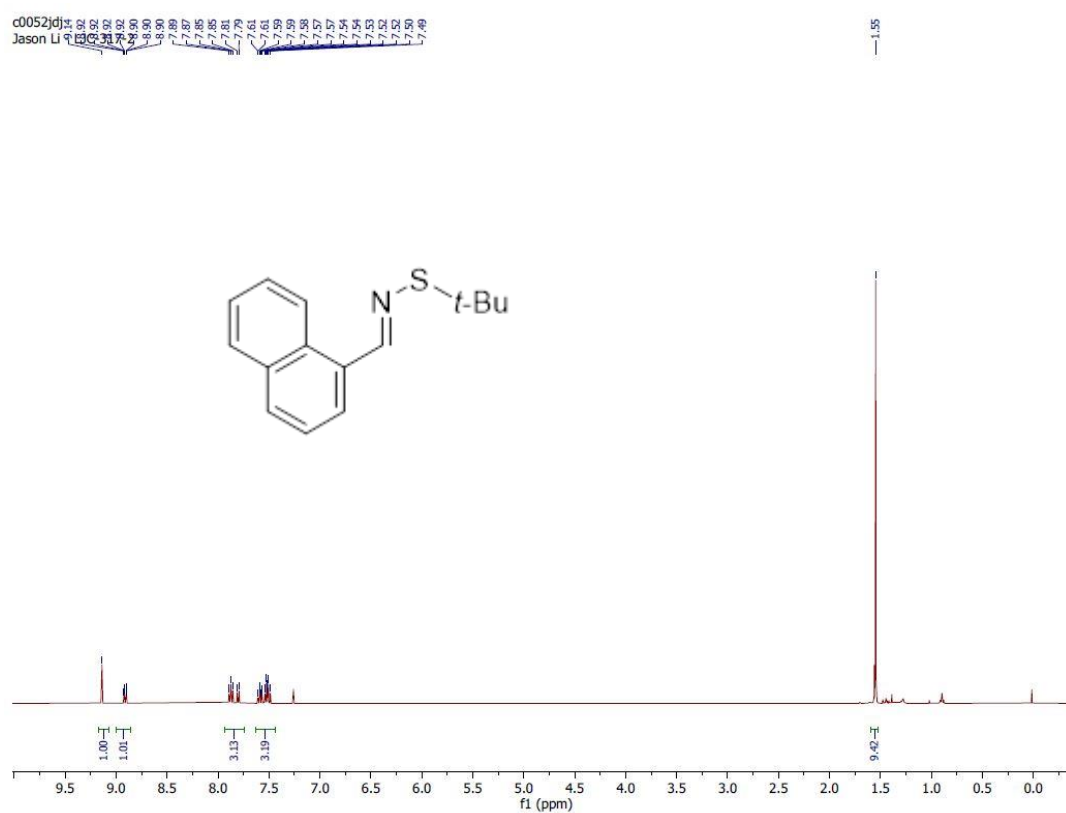

c0086jdj  
Jason Li - LIC-317-2

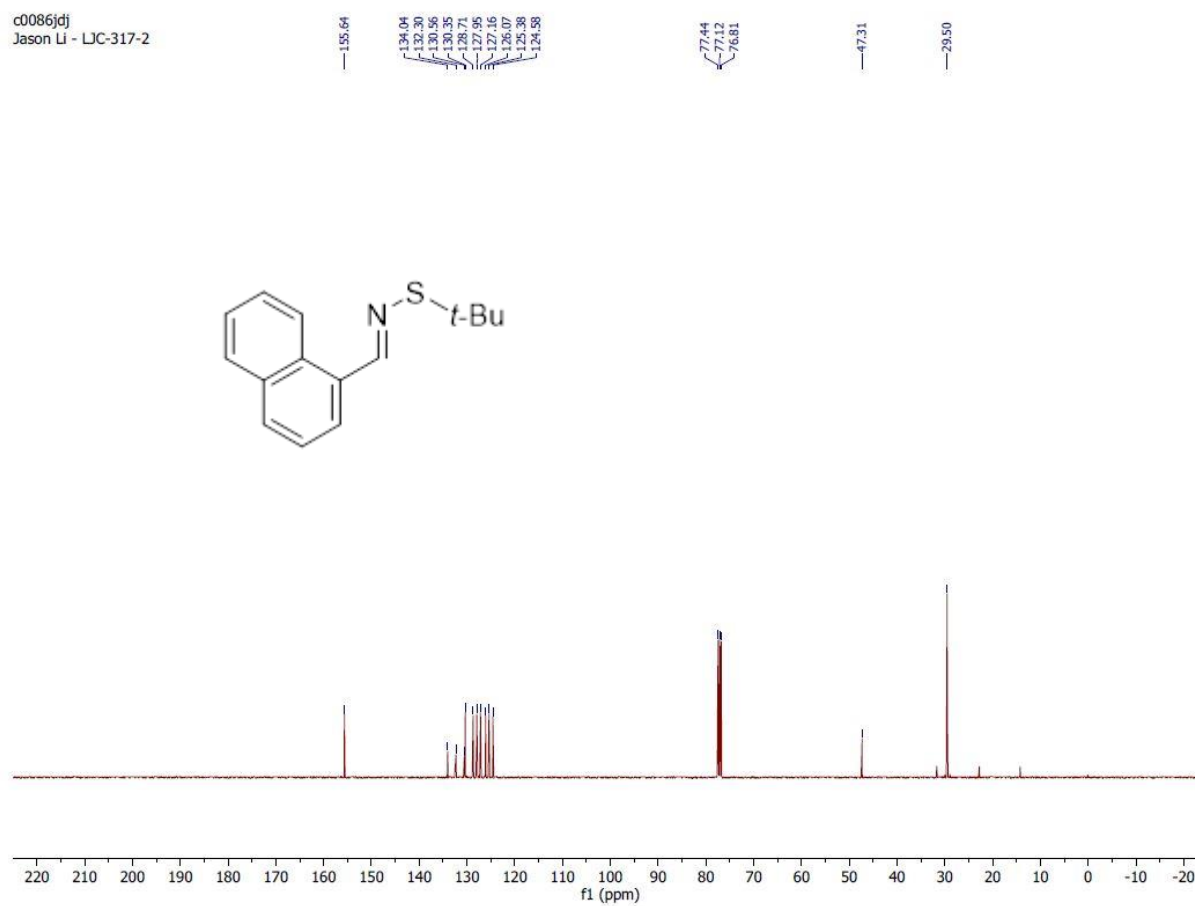

# Data for **6i-tBu**

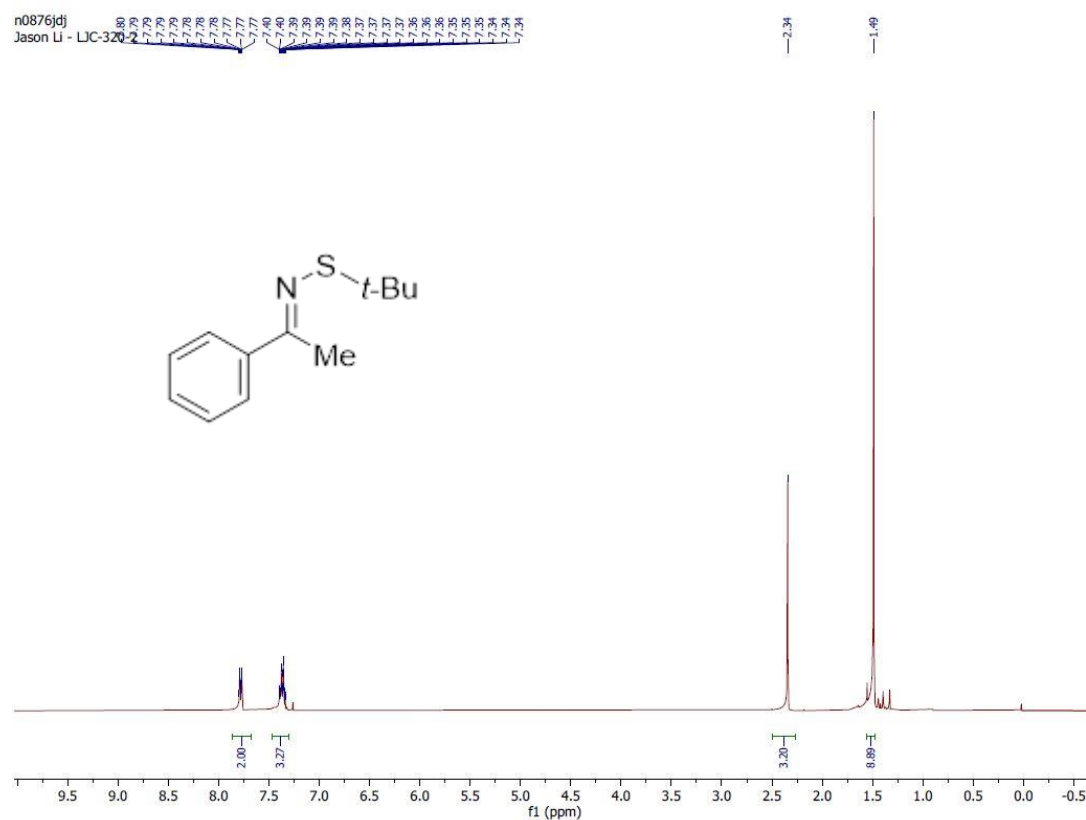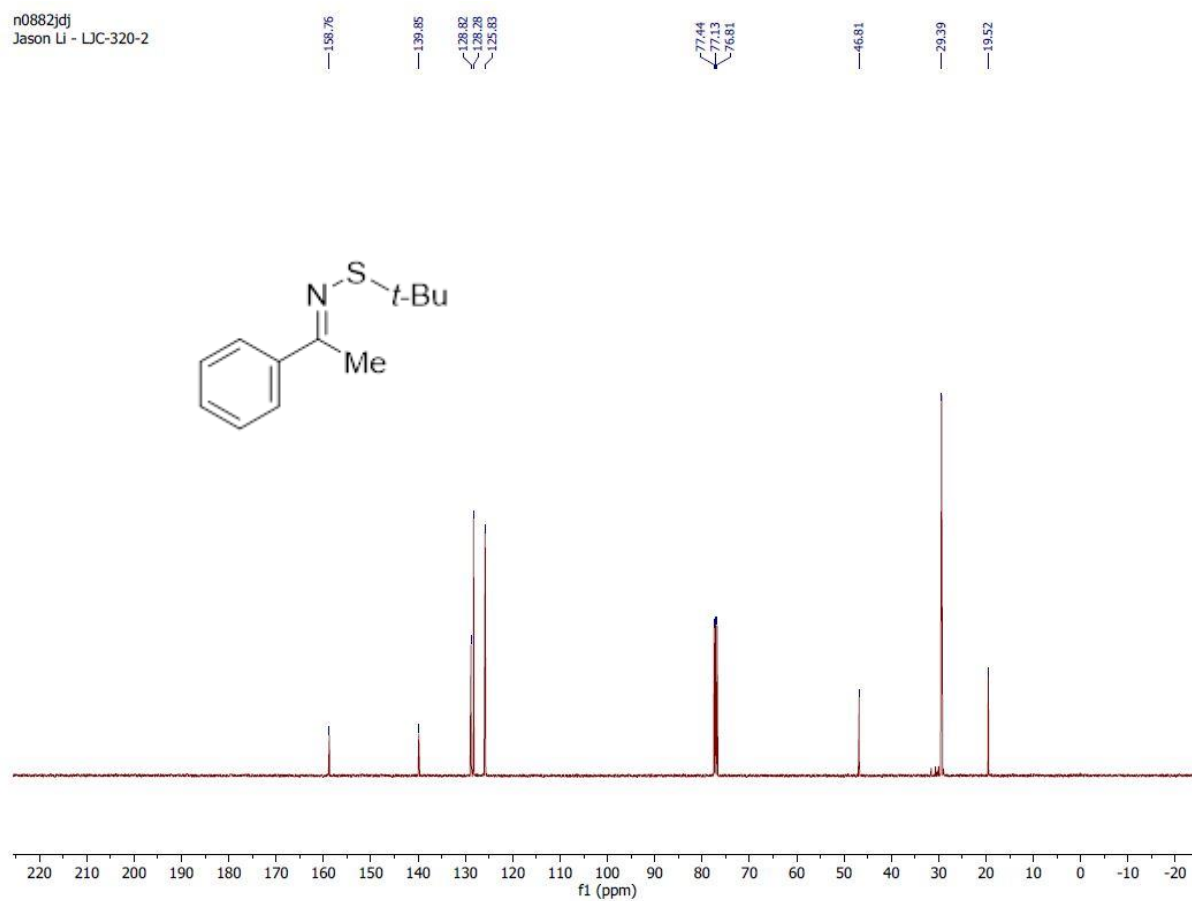

# Data for **6k-tBu**

n0875jdj  
Jason Li - LJC-319-2

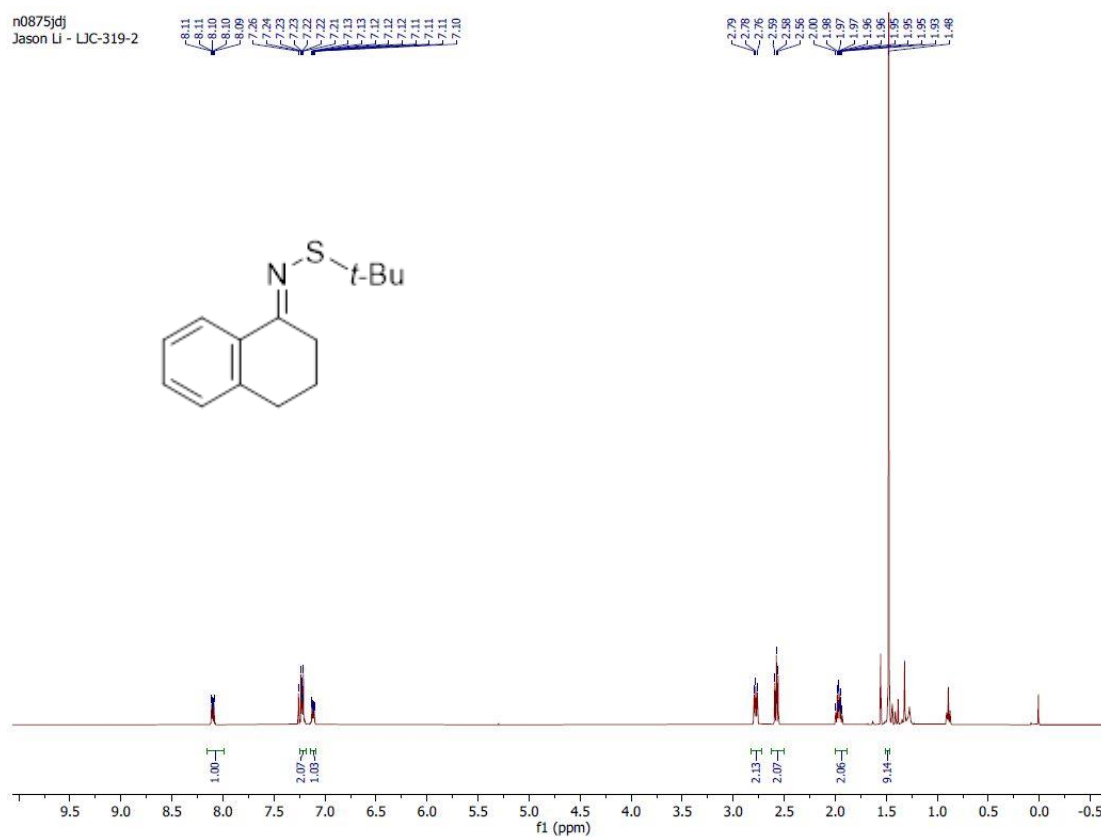

n0881jdj  
Jason Li - LJC-319-2

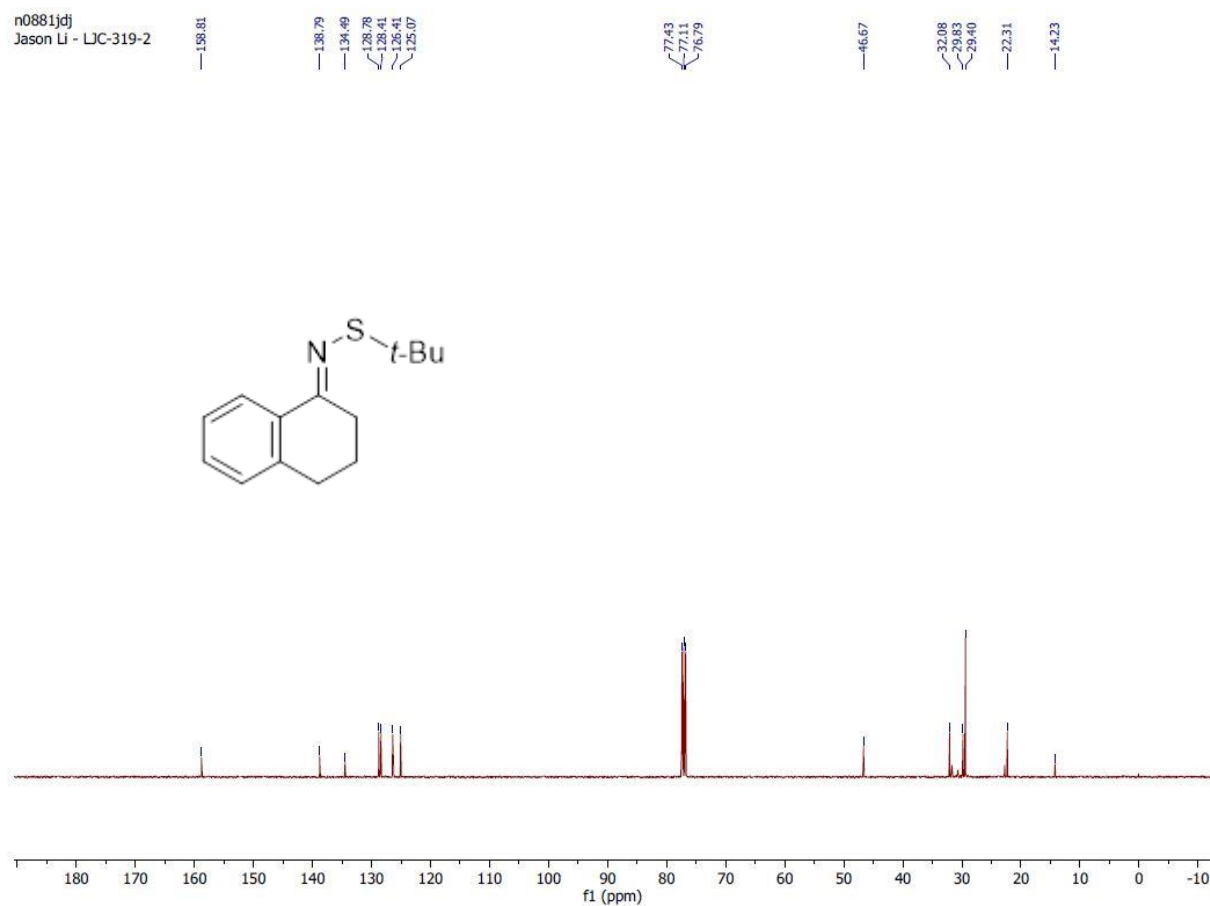

# Data for **6l-tBu**

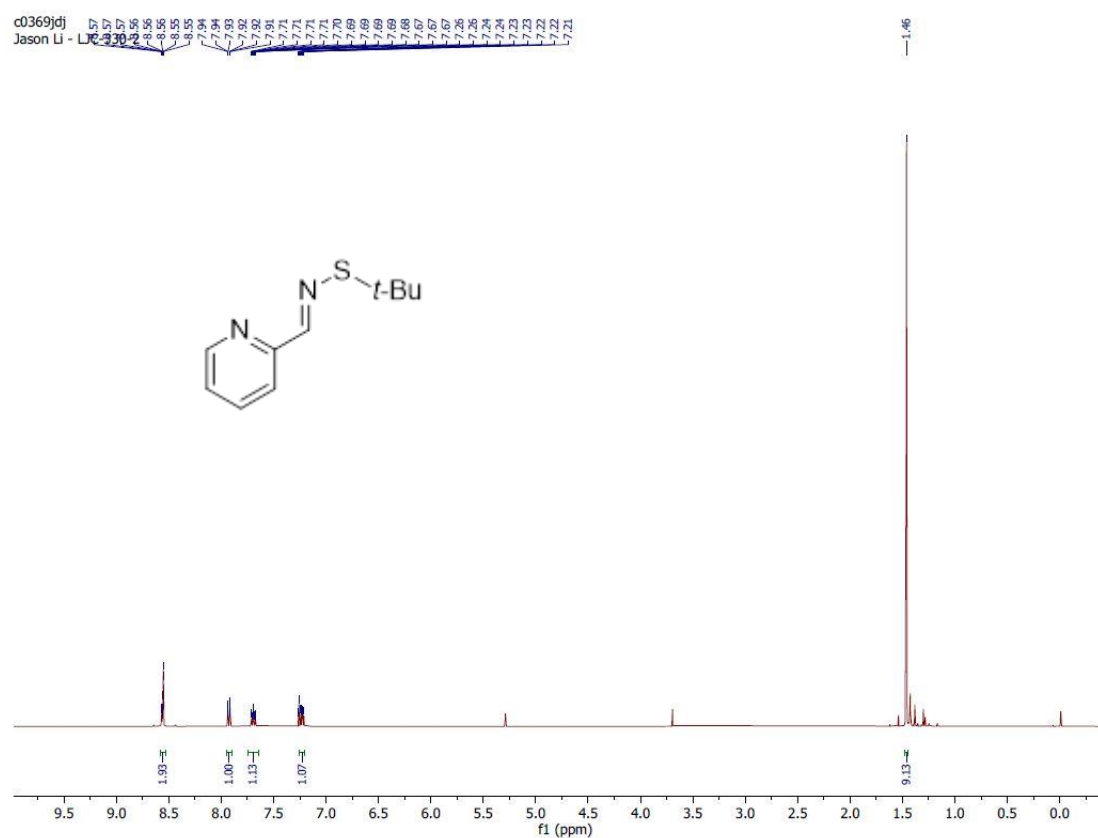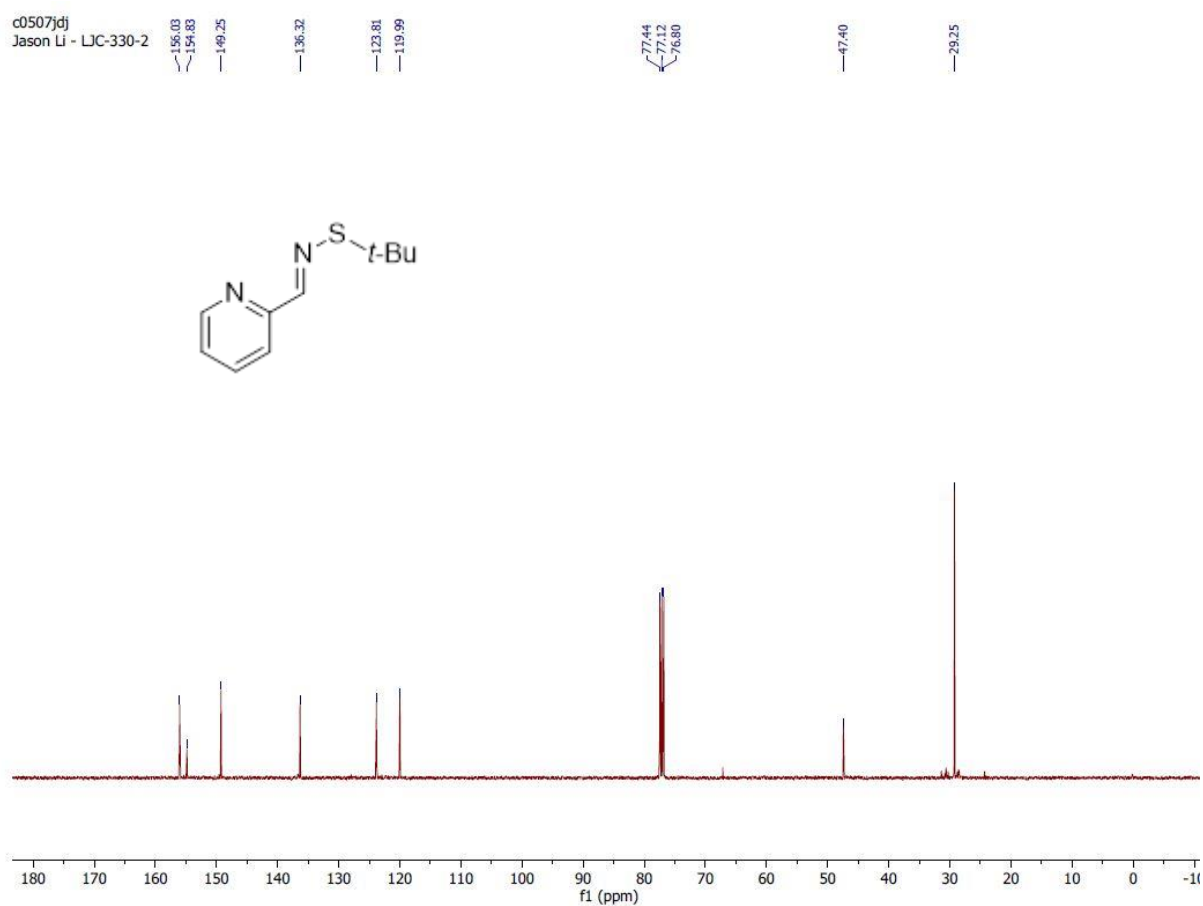

# Data for 6m-*t*Bu

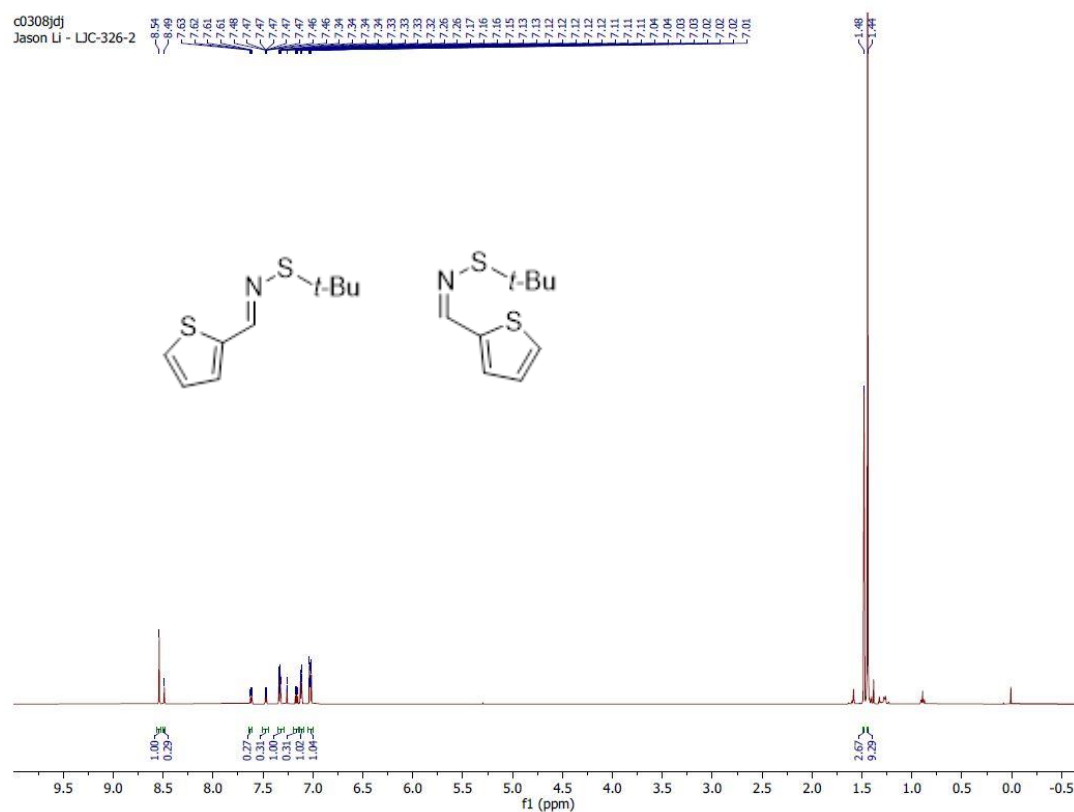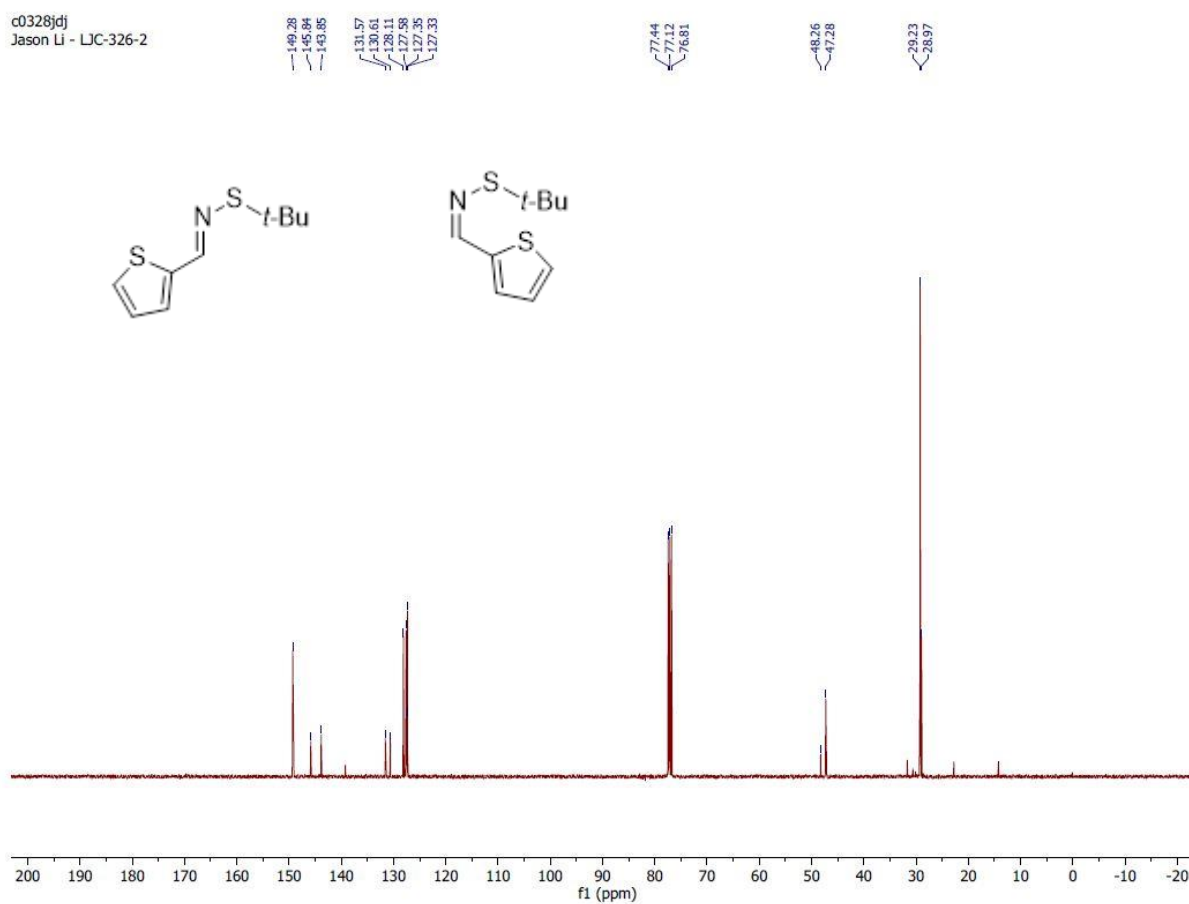

# Data for **6n-*t*Bu**

b9753jdj  
Jason Li - LJC-301-2

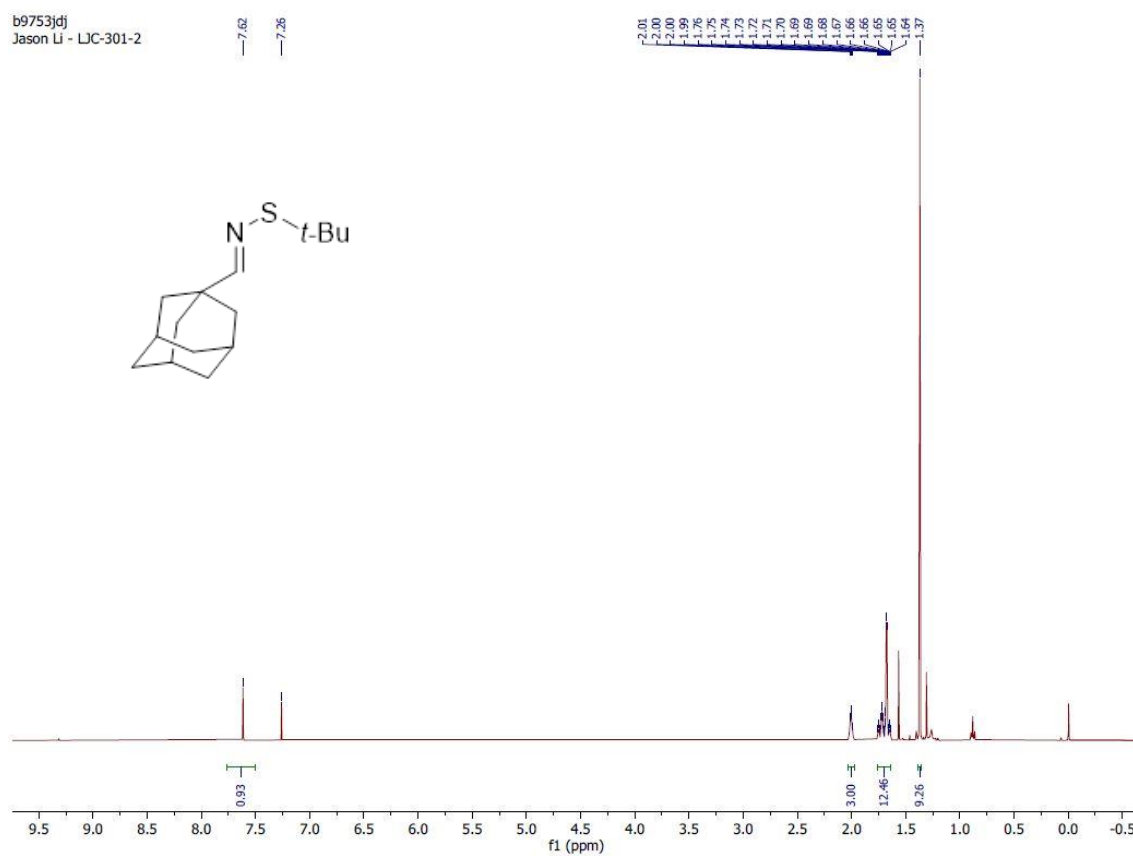

b9753jdj  
Jason Li - LJC-301-2

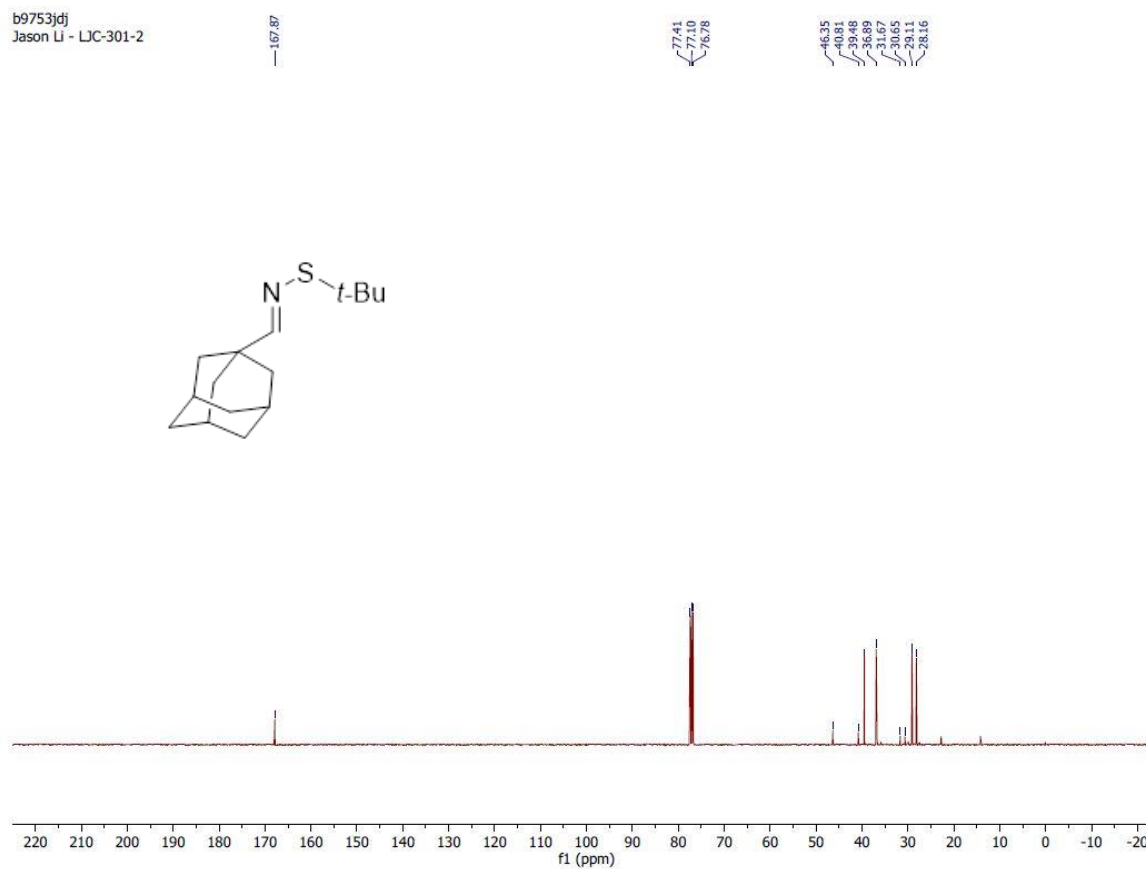

# Data for (*R*)-12a

m8279jdj  
Jason Li - LIC-237-P

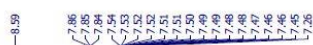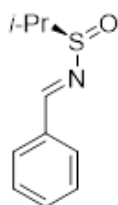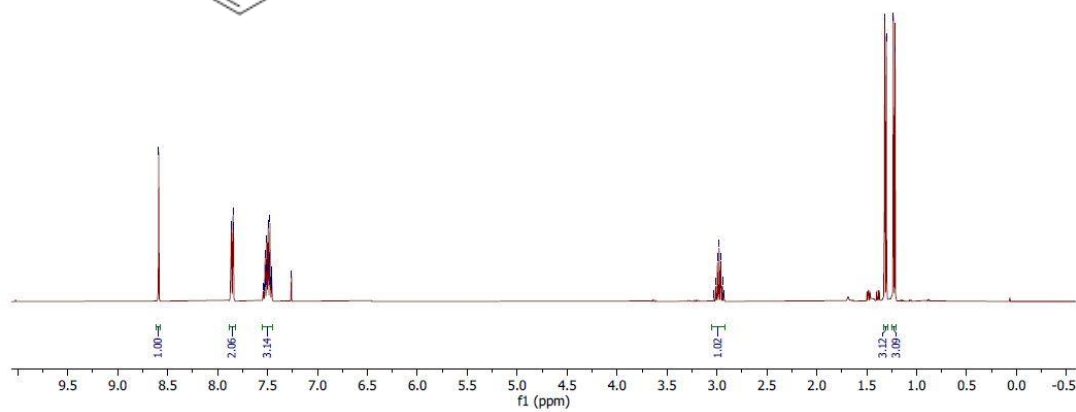

b6563jdj  
Jason Li - LIC-237-P

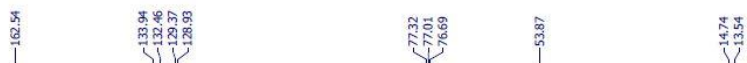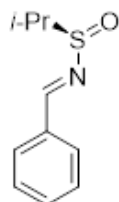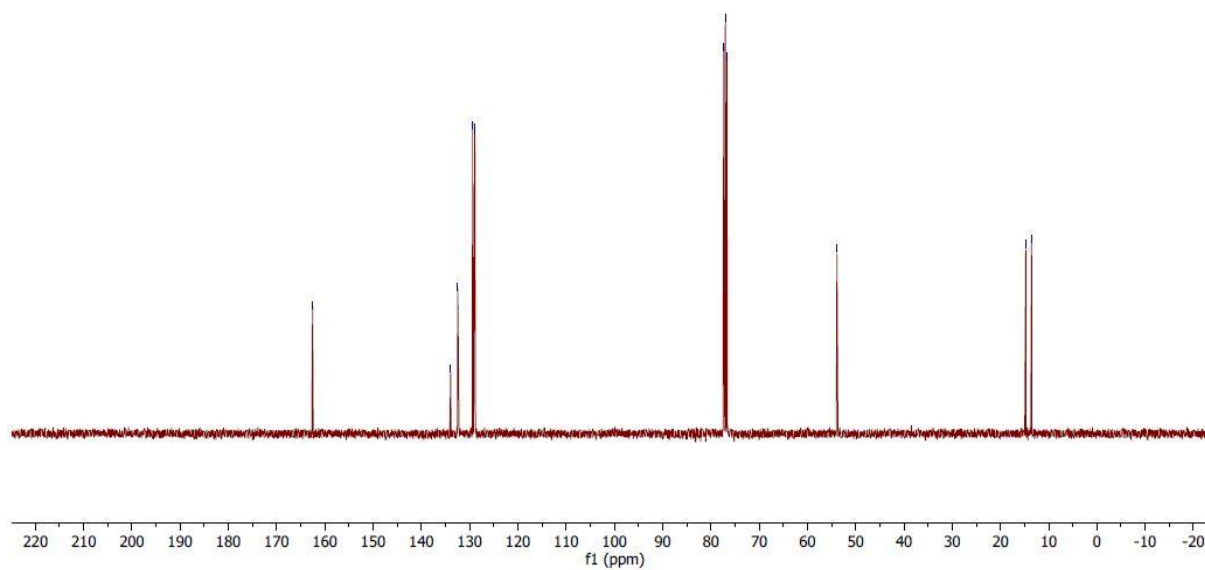

# Data for (*R*)-12b

b8674jdj  
Jason Li - LJC-278-1

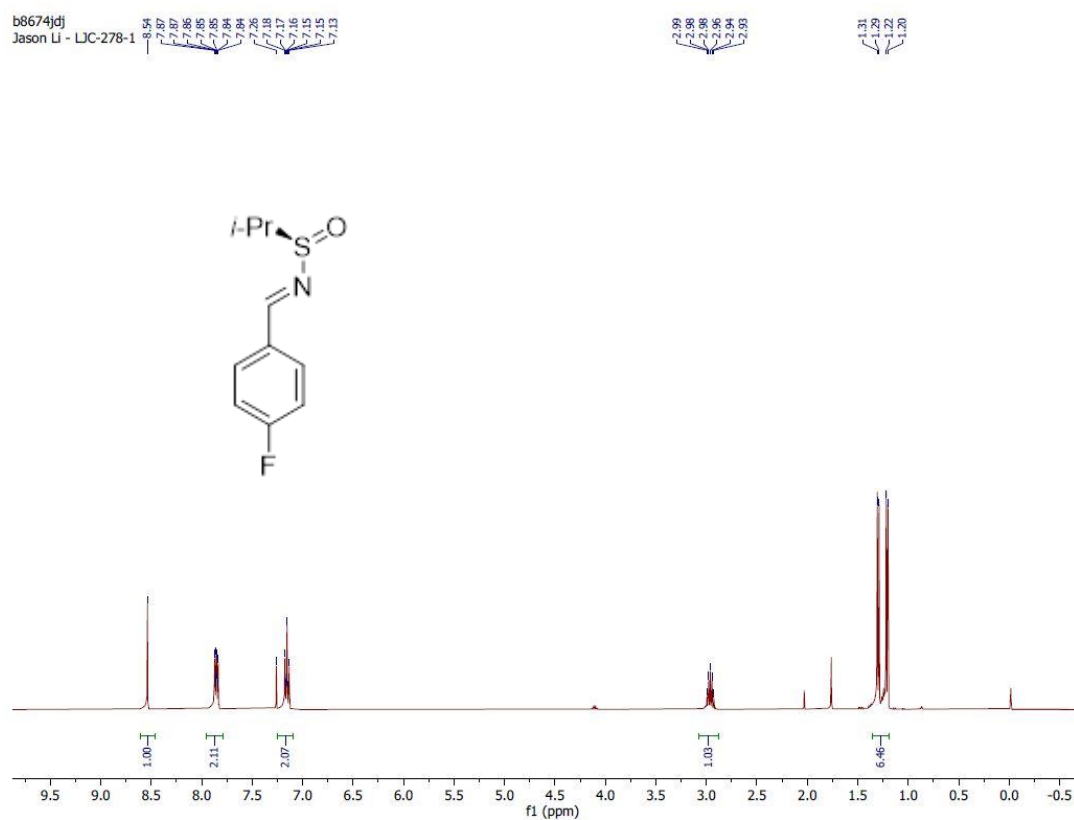

n0051jdj  
Jason Li - LJC-278-1

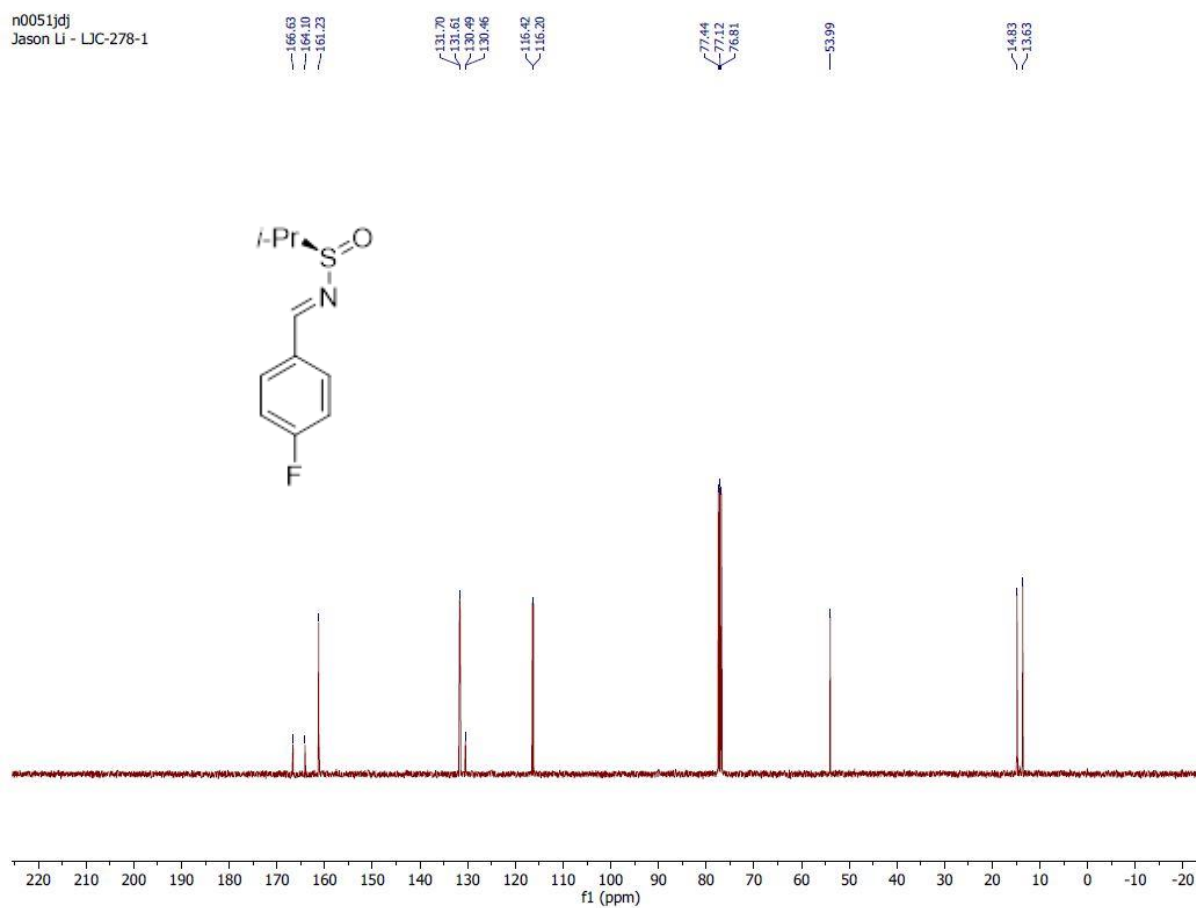



n0051jdj  
Jason Li - LIC-278-1

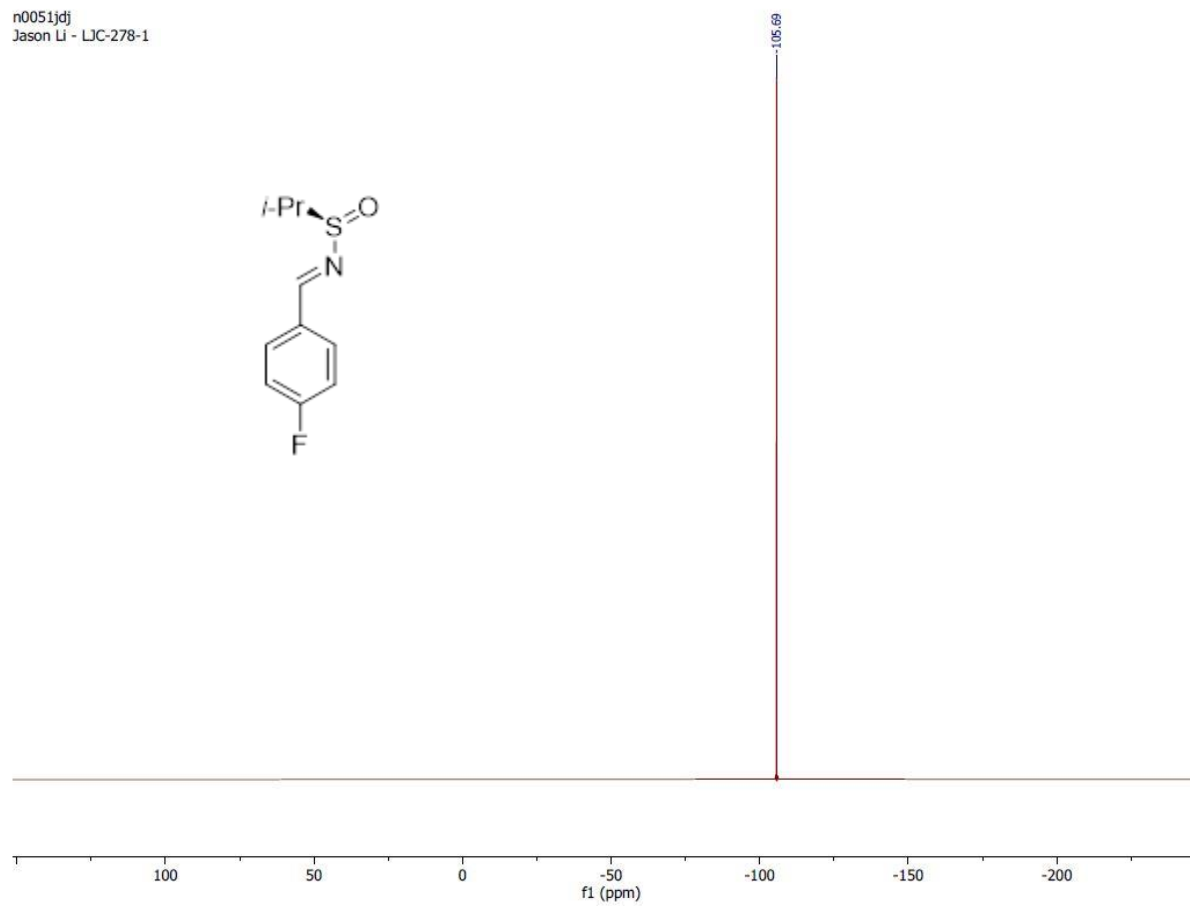

# Data for (*R*)-12c

b7397jdj  
Jason Li - LJC-255-1

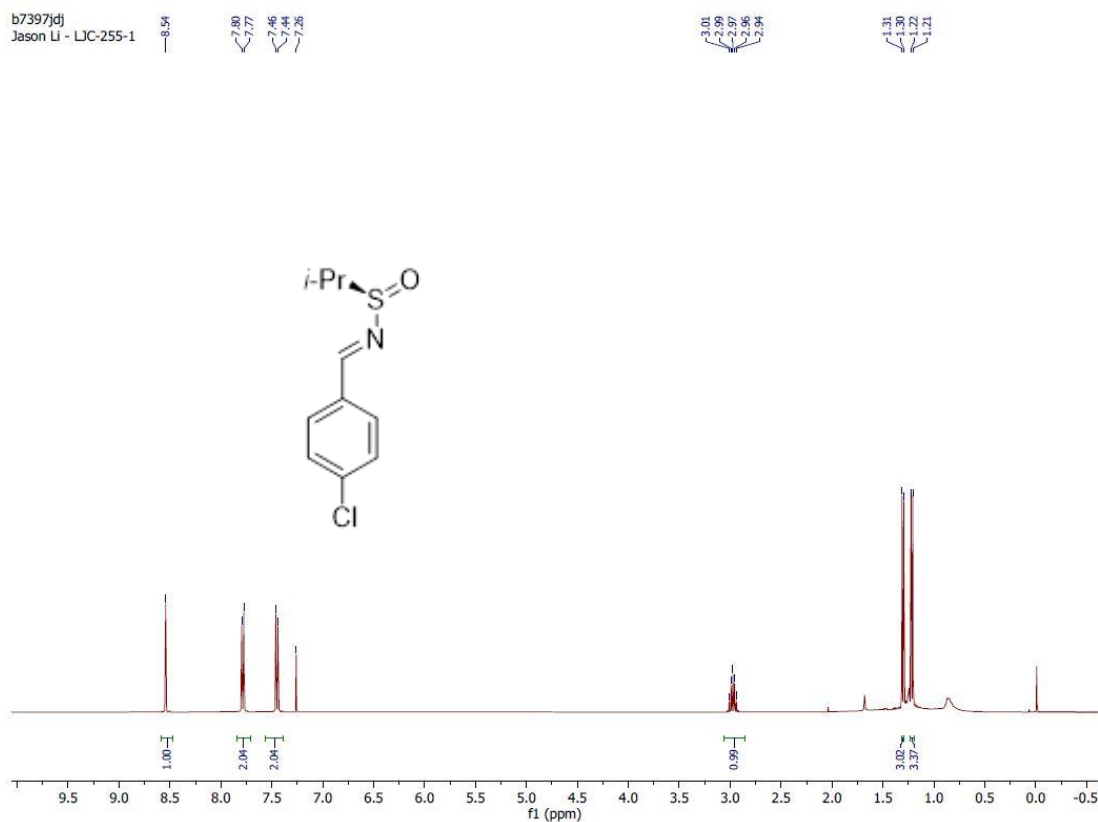

b7416jdj  
Jason Li - LJC-255-1

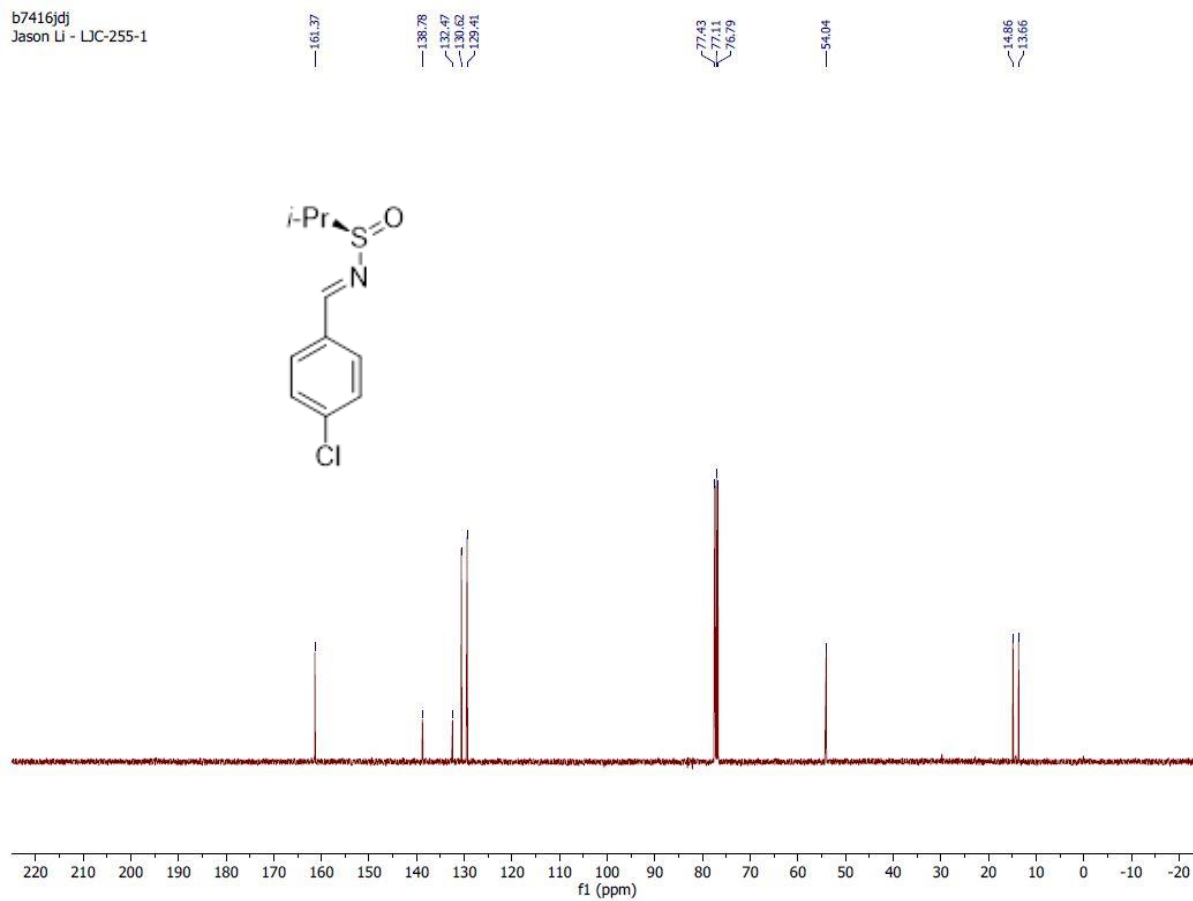

# Data for (*R*)-12d

b8675jdj  
Jason Li - LJC-278-2

7.79  
7.71  
7.63  
7.61  
7.26

3.01  
3.00  
2.98  
2.96  
2.94

1.32  
1.30  
1.28  
1.26

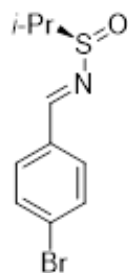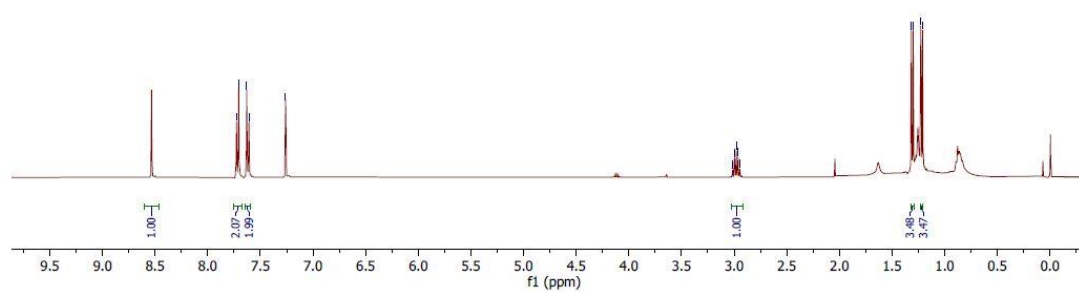

b8691jdj  
Jason Li - LJC-278-2

161.52

132.85  
132.39  
130.76  
127.39

77.42  
77.10  
76.78

54.03

14.87  
13.66

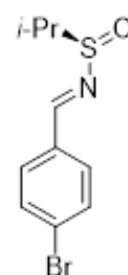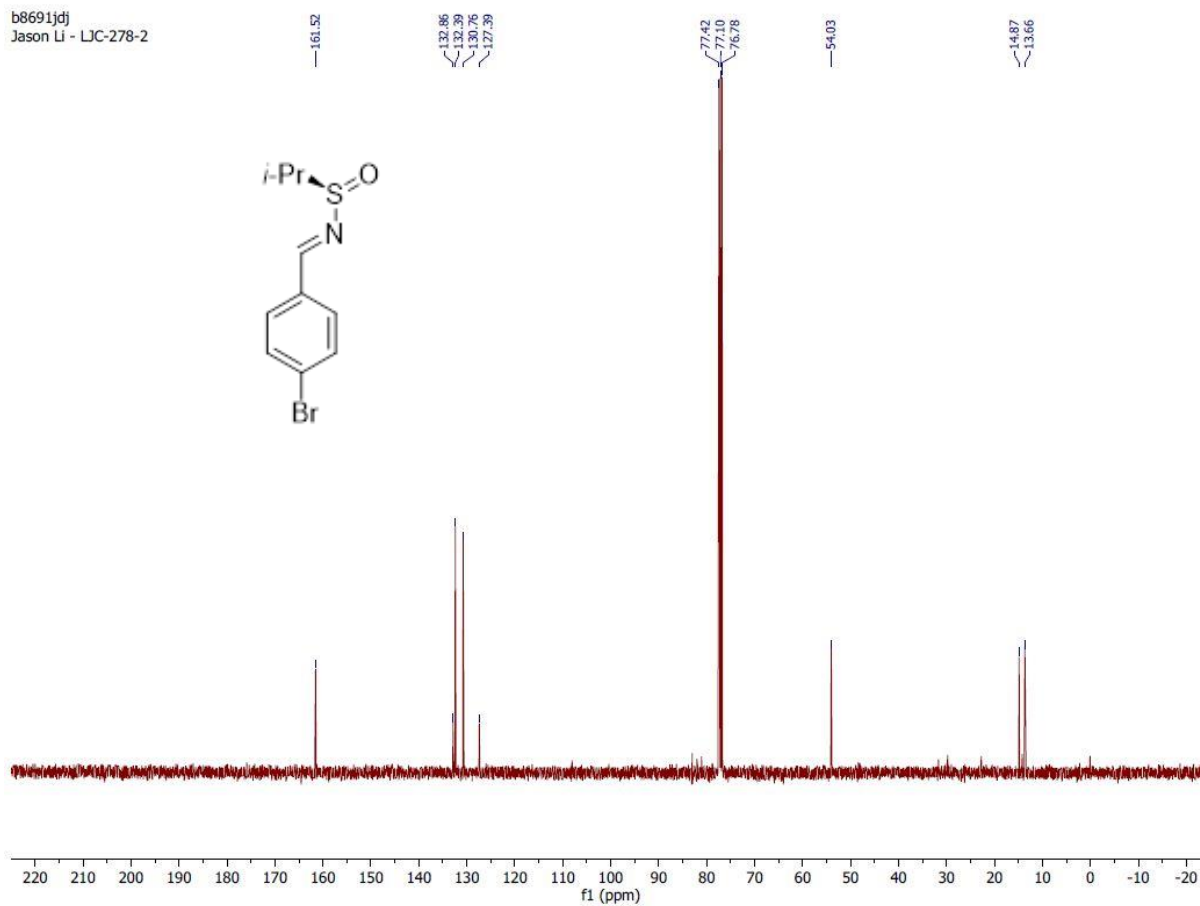

# Data for (*R*)-12e

n0199jdj  
Jason Li - LJC-275-2

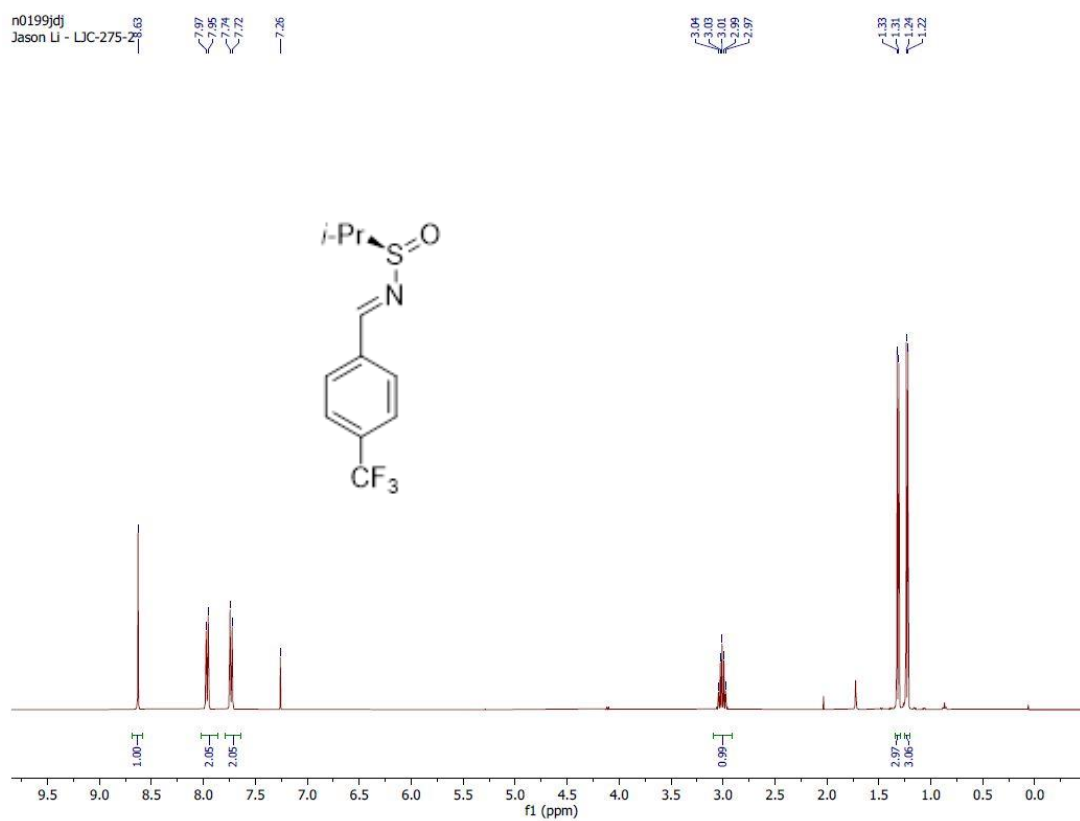

n0225jdj  
Jason Li - LJC-275-2

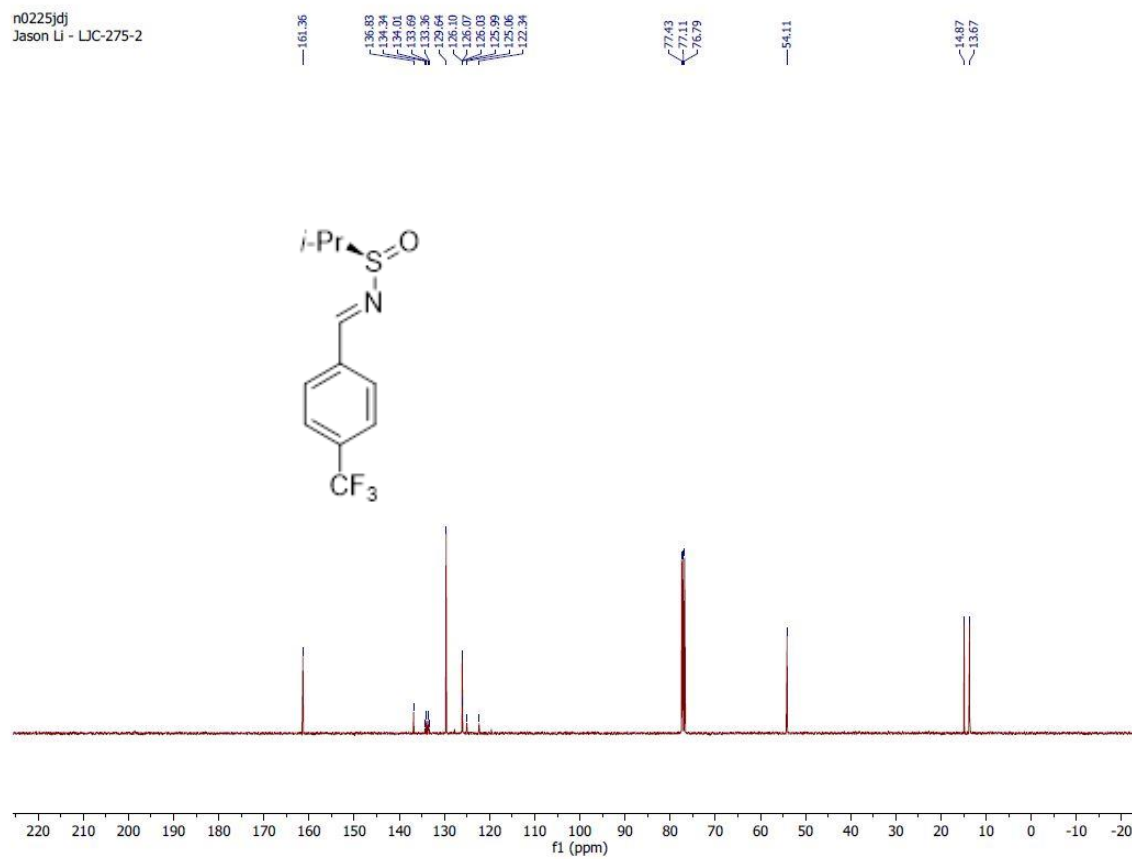

m9930jdj  
Jason Li - LJC-275-2

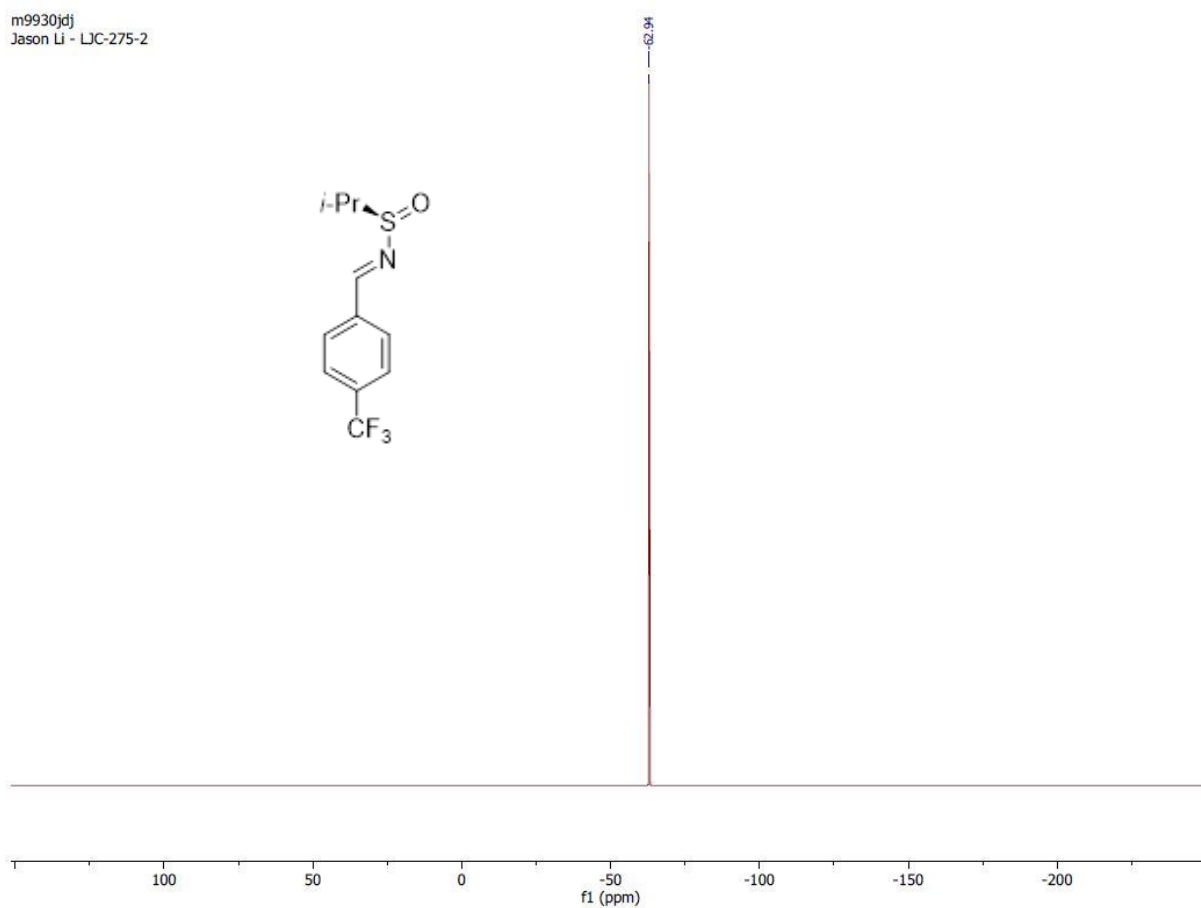

# Data for (*R*)-12f

m8906jdj  
Jason Li - LJC-253-2

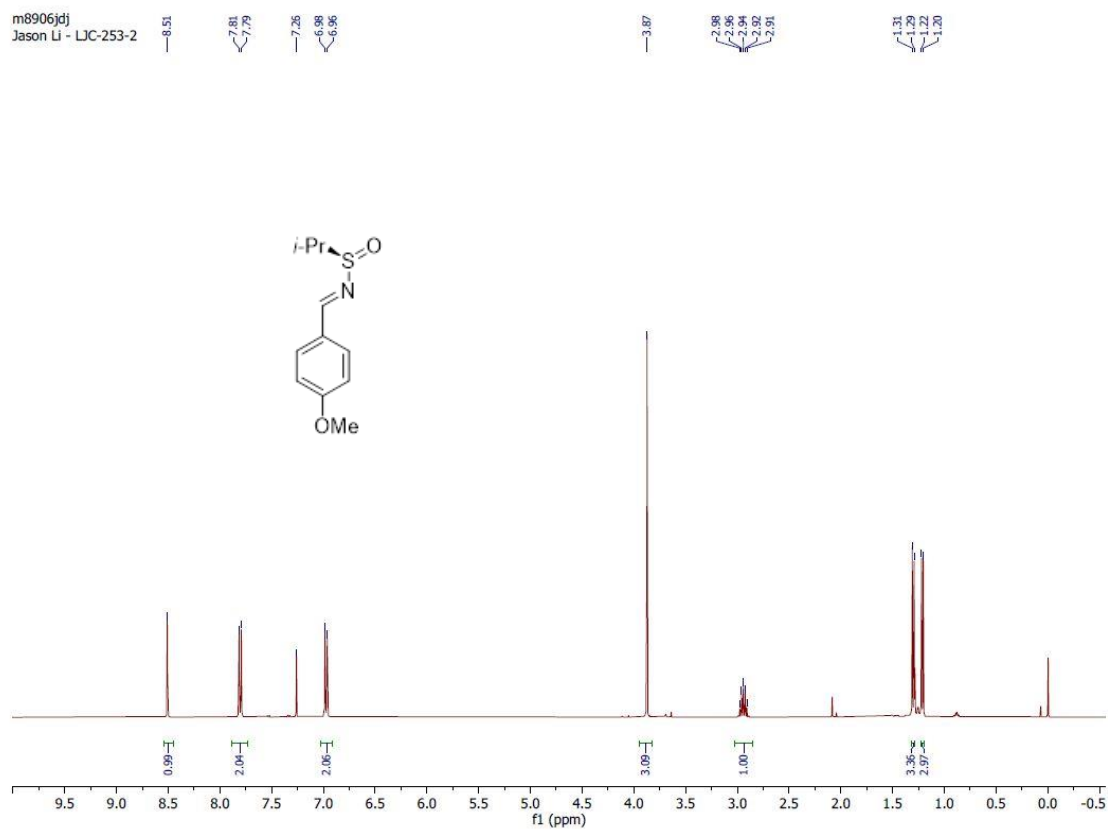

b7296jdj  
Jason Li - LJC-253-2

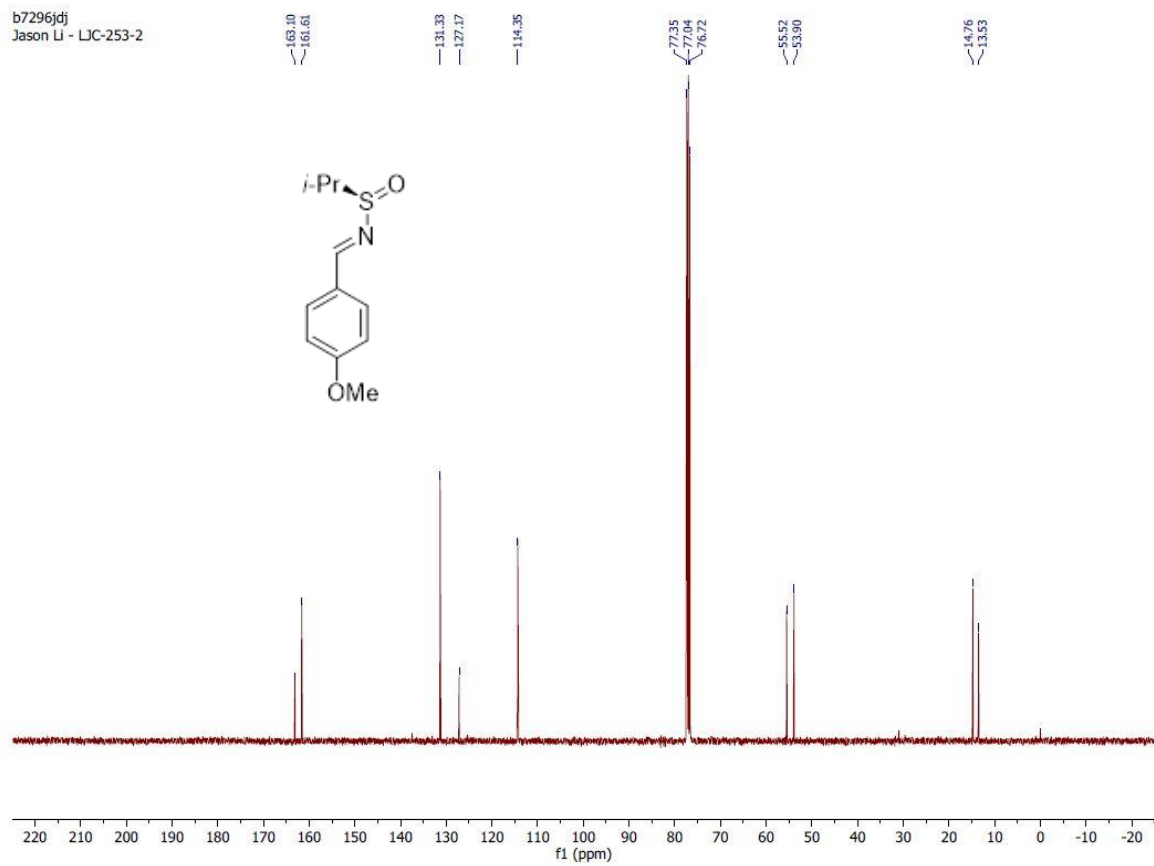

# Data for (*R*)-12g

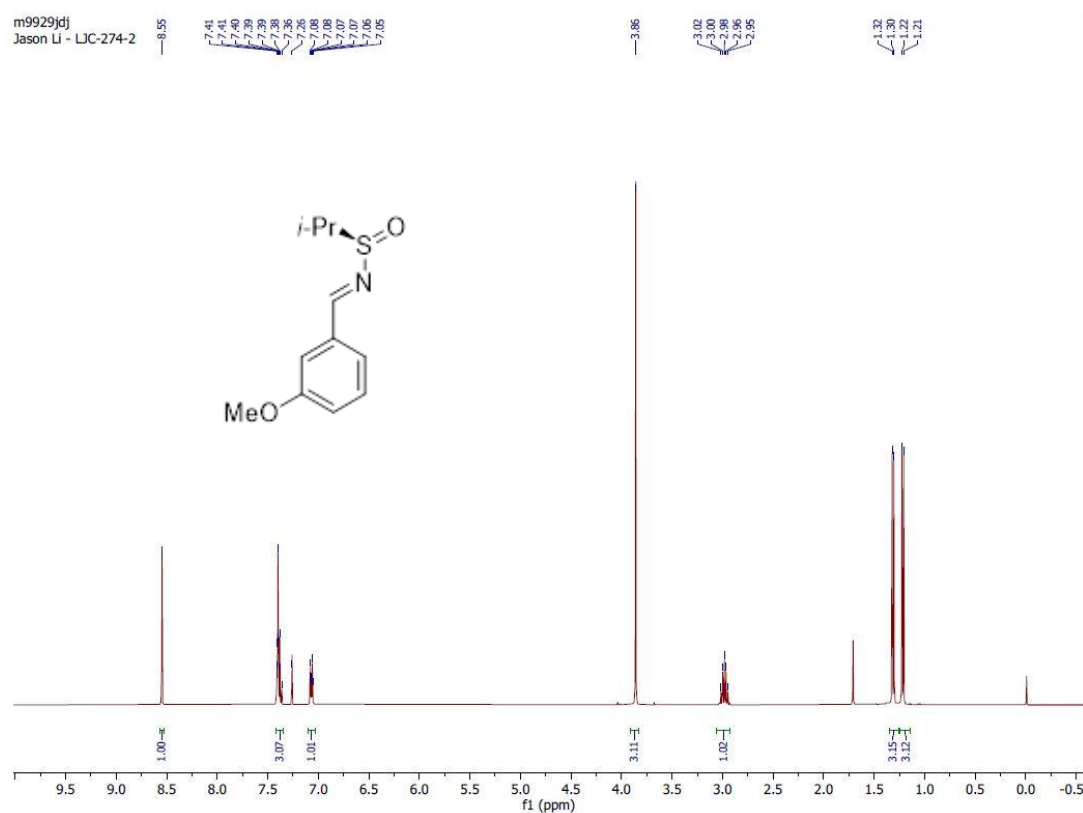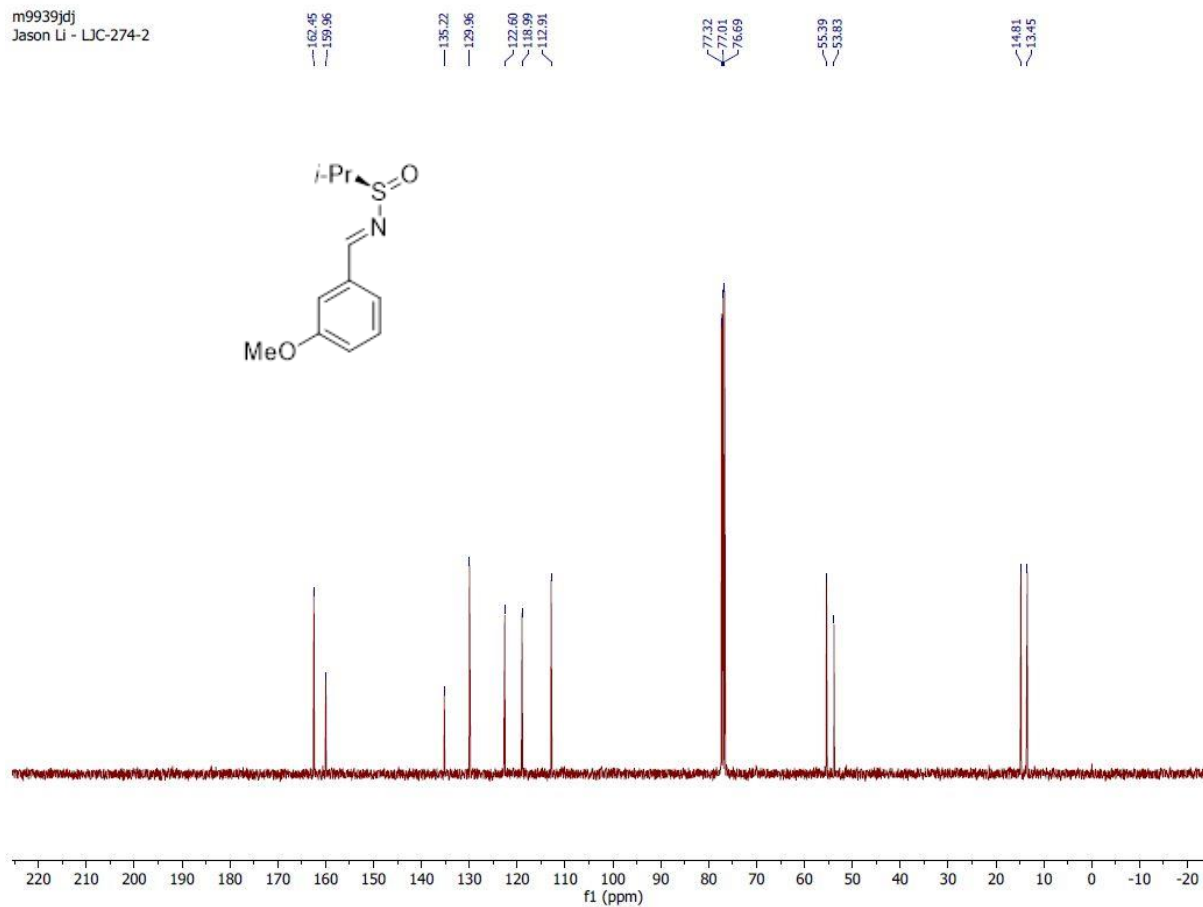

# Data for (*R*)-12h

n0116jdj  
Jason Li -

3.10  
3.08  
3.06  
3.04  
3.03

1.37  
1.36  
1.30  
1.29

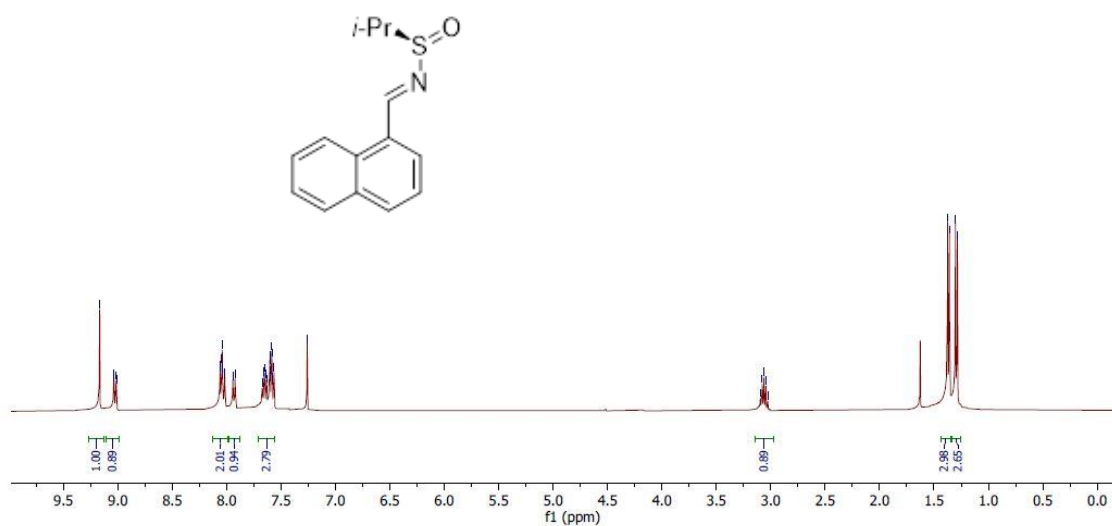

n0139jdj  
Jason Li - LIC-281-2-2

162.36  
133.99  
133.44  
131.99  
131.33  
129.42  
128.95  
128.14  
126.63  
126.33  
124.46

77.43  
77.12  
76.80

54.09

14.86  
13.76

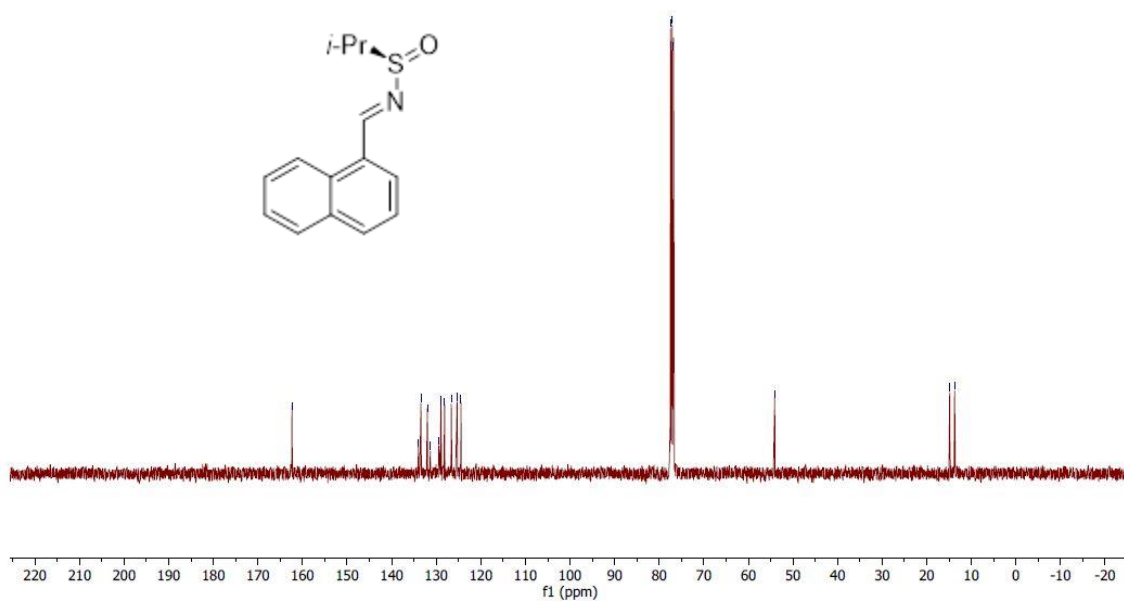



# Data for (*R*)-12i

m9210jdj  
Jason Li - LIC-260-2

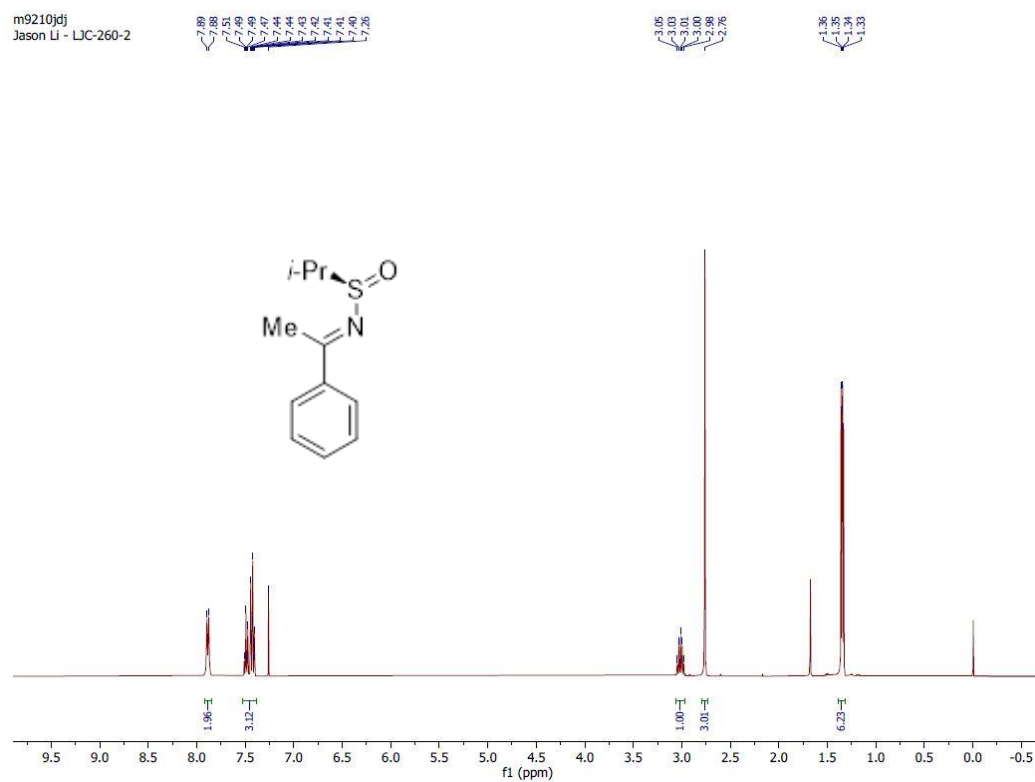

m9210jdj  
Jason Li - LIC-260-2

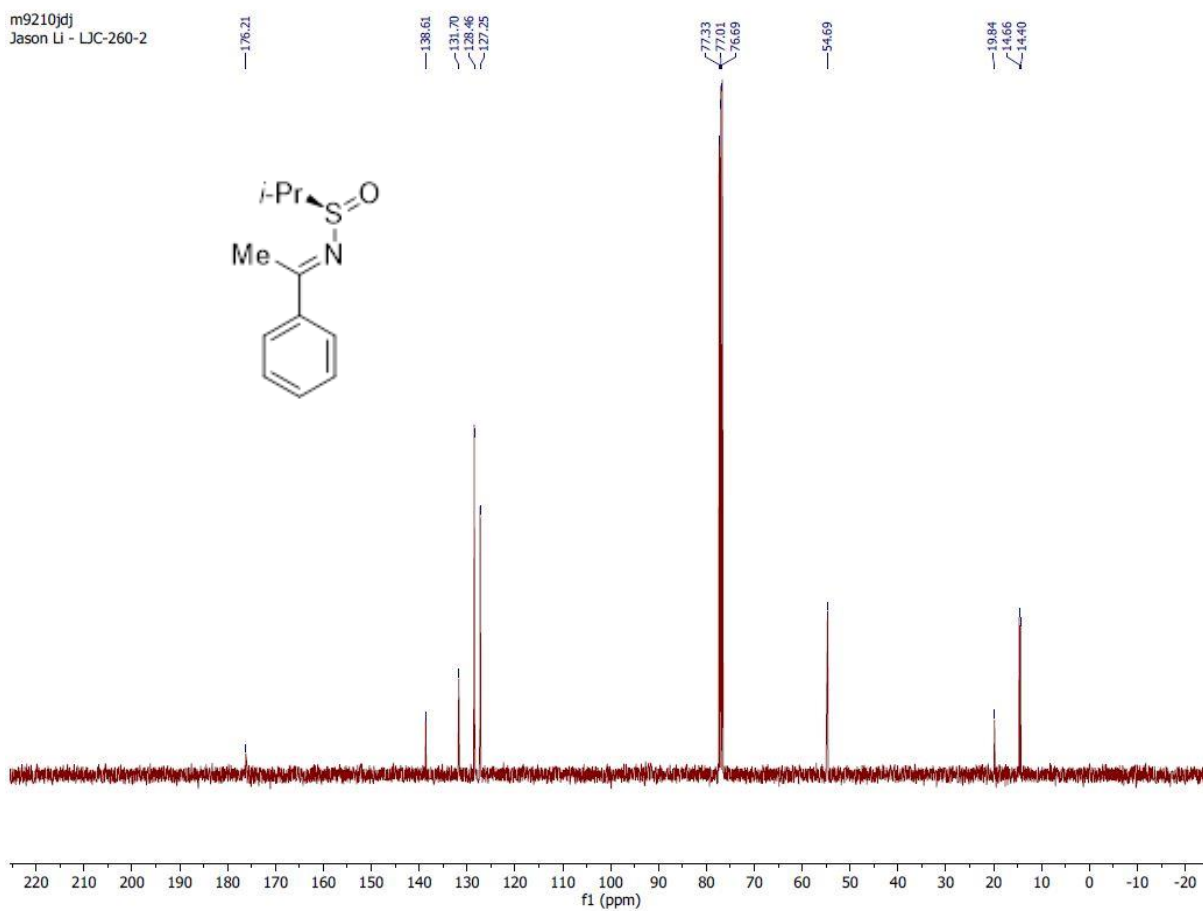

# Data for (*R*)-12j

c0626jdj  
Jason Li - LIC-340-2

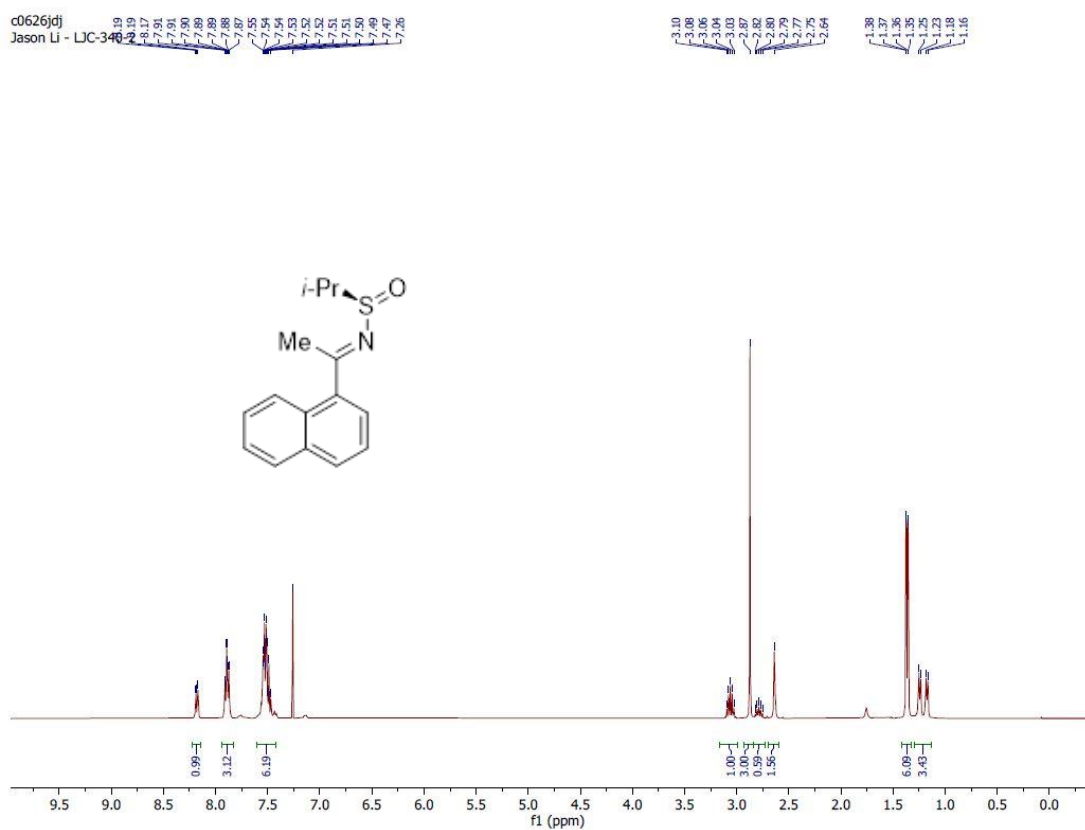

c0626jdj  
Jason Li - LIC-340-2

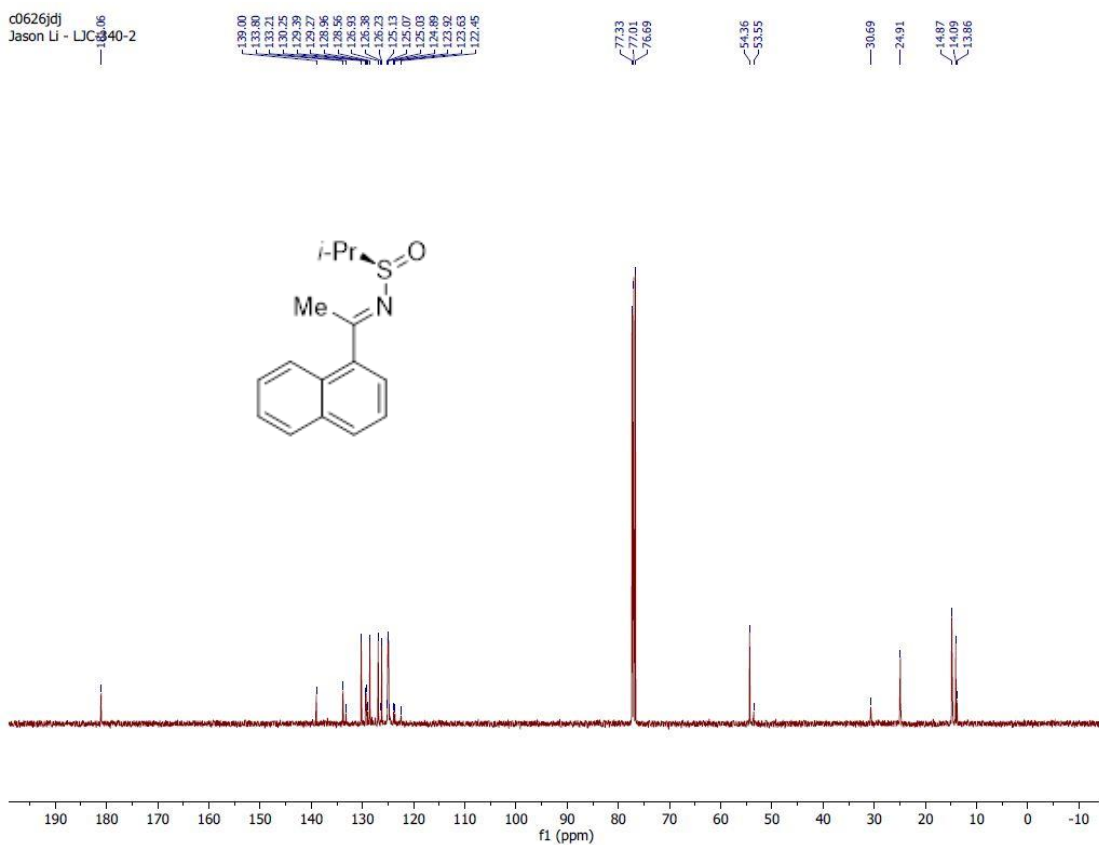

# Data for (*R*)-12k

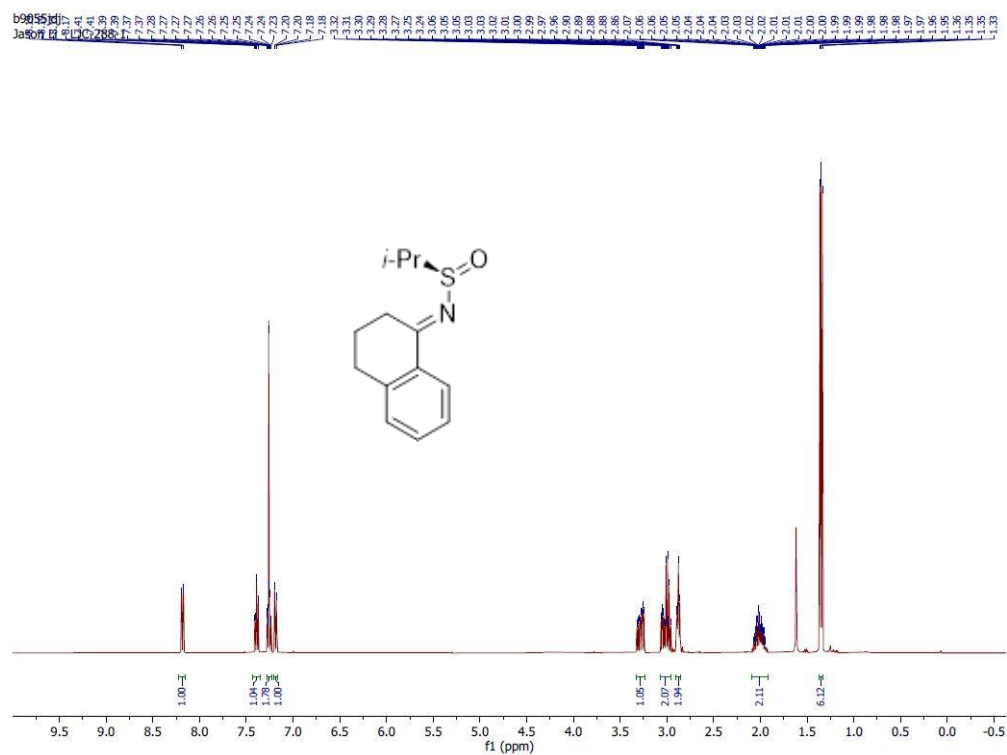

n0290jdj  
Jason Li - UC-288-1

—176.77

—142.30

—132.94

—132.15

—128.99

—127.18

—126.60

—77.44

—77.12

—76.80

—54.72

—32.43

—29.59

—22.75

—14.65

—14.58

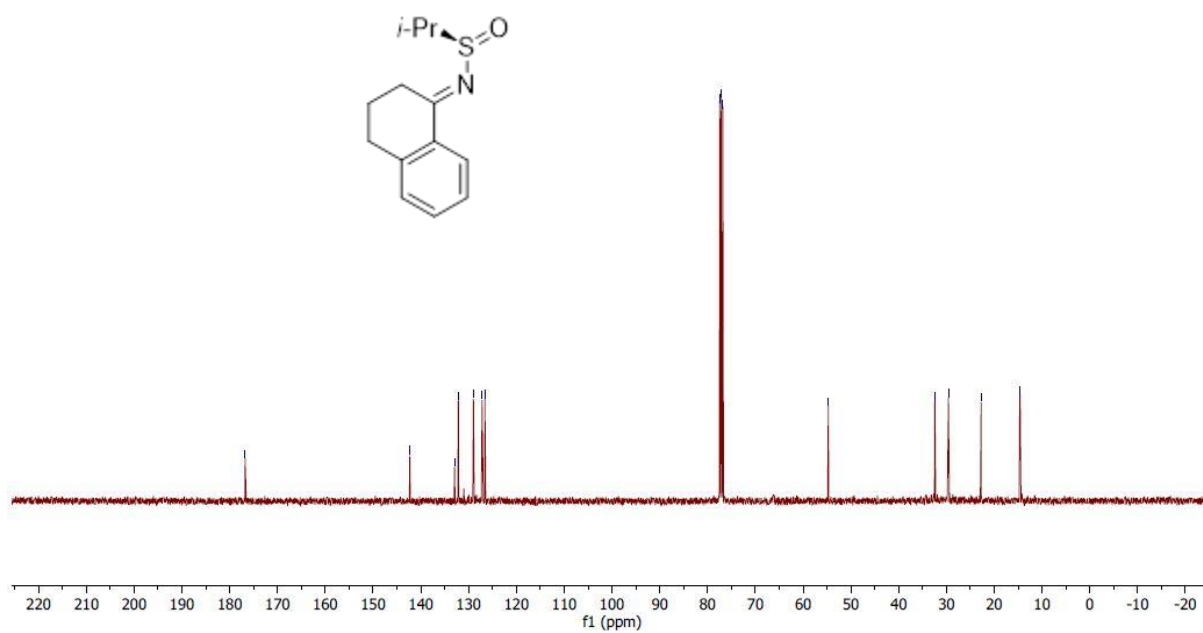

b739801  
Jason

Chemical structure: CC(C)S(=O)(=O)/C=C/c1cccnc1

<sup>1</sup>H NMR spectrum (ppm):

- 7.88 (d, 1H, integration 1.04)
- 7.84 (d, 1H, integration 0.97)
- 7.79 (d, 1H, integration 1.12)
- 7.75 (d, 1H, integration 1.12)
- 7.69 (d, 1H, integration 0.99)
- 7.64 (d, 1H, integration 1.00)
- 6.71 (d, 1H, integration 3.05)
- 3.00 (m, 1H, integration 3.32)
- 1.20 (d, 6H, integration 3.23)

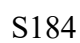

# Data for (*S*)-13a

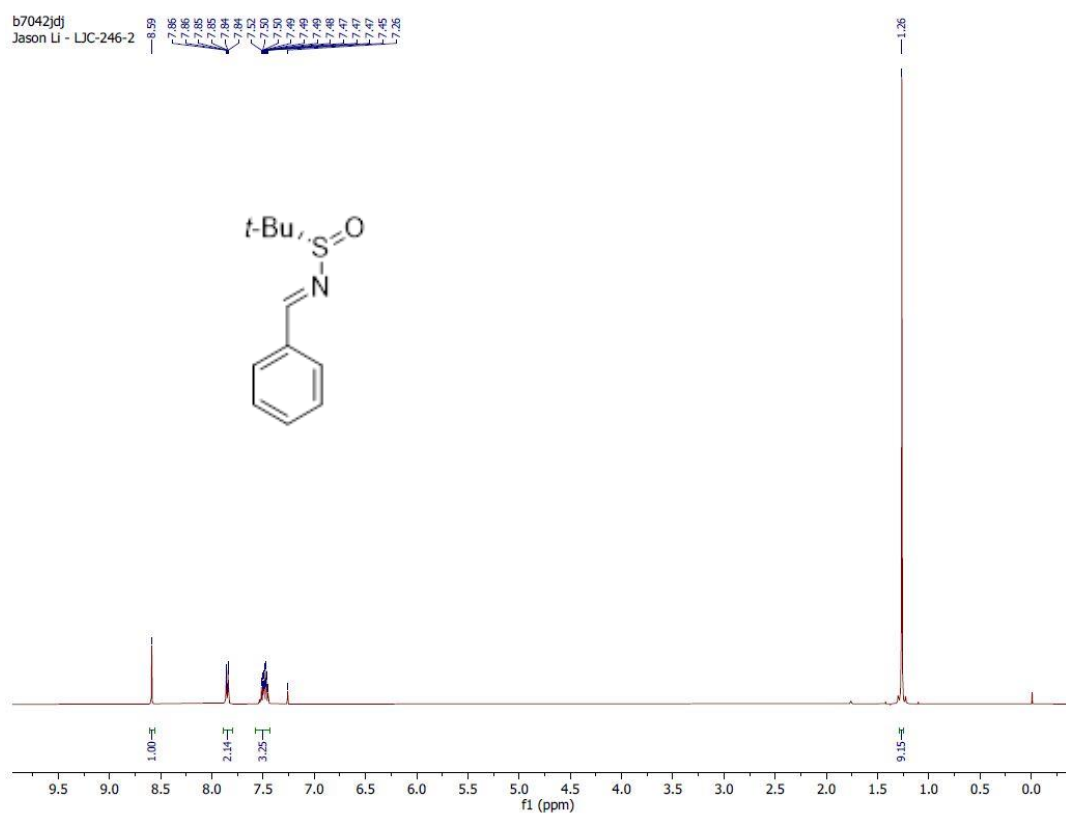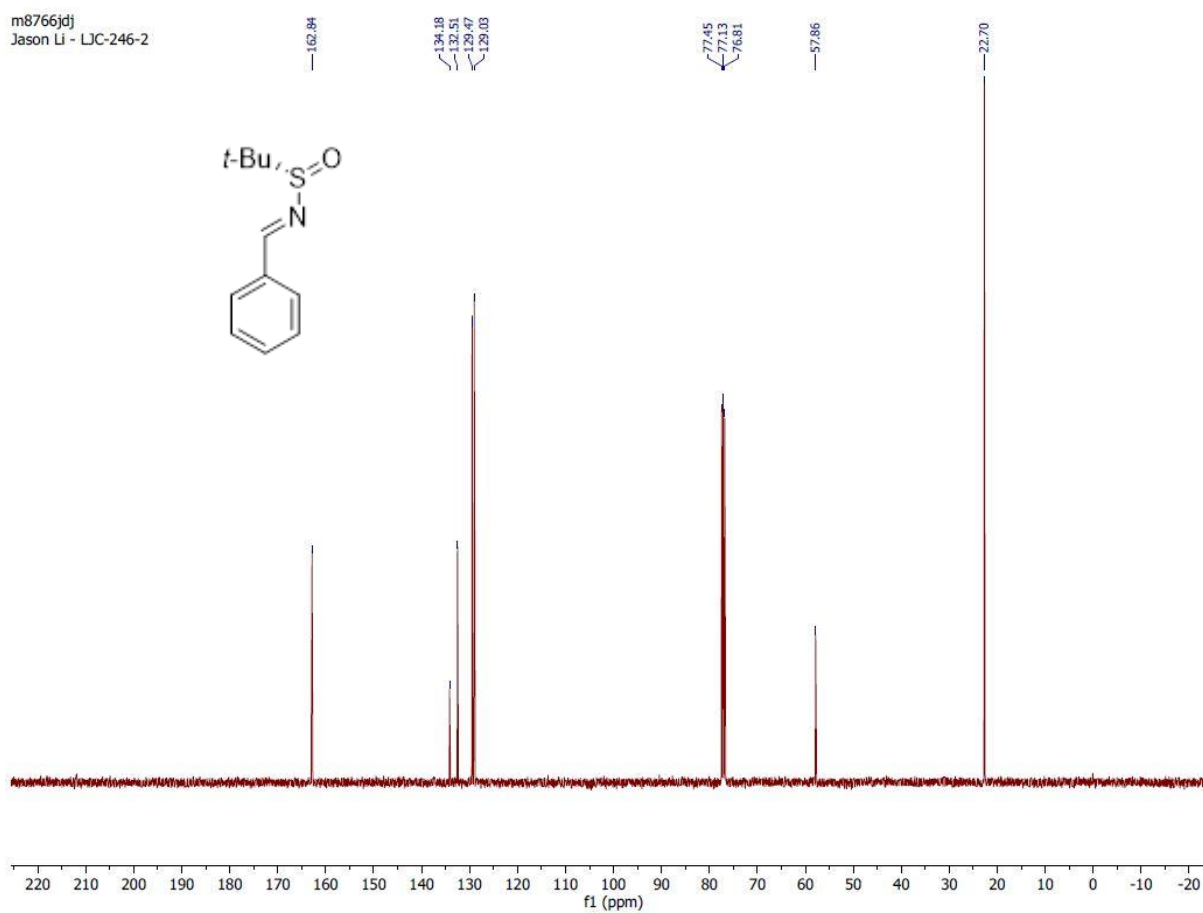

# Data for (*S*)-13b

b9705jdj  
Jason Li - LIC-300-2

8.54  
7.87  
7.86  
7.85  
7.84  
7.26  
7.18  
7.15  
7.13

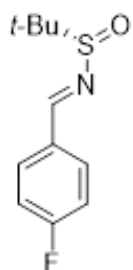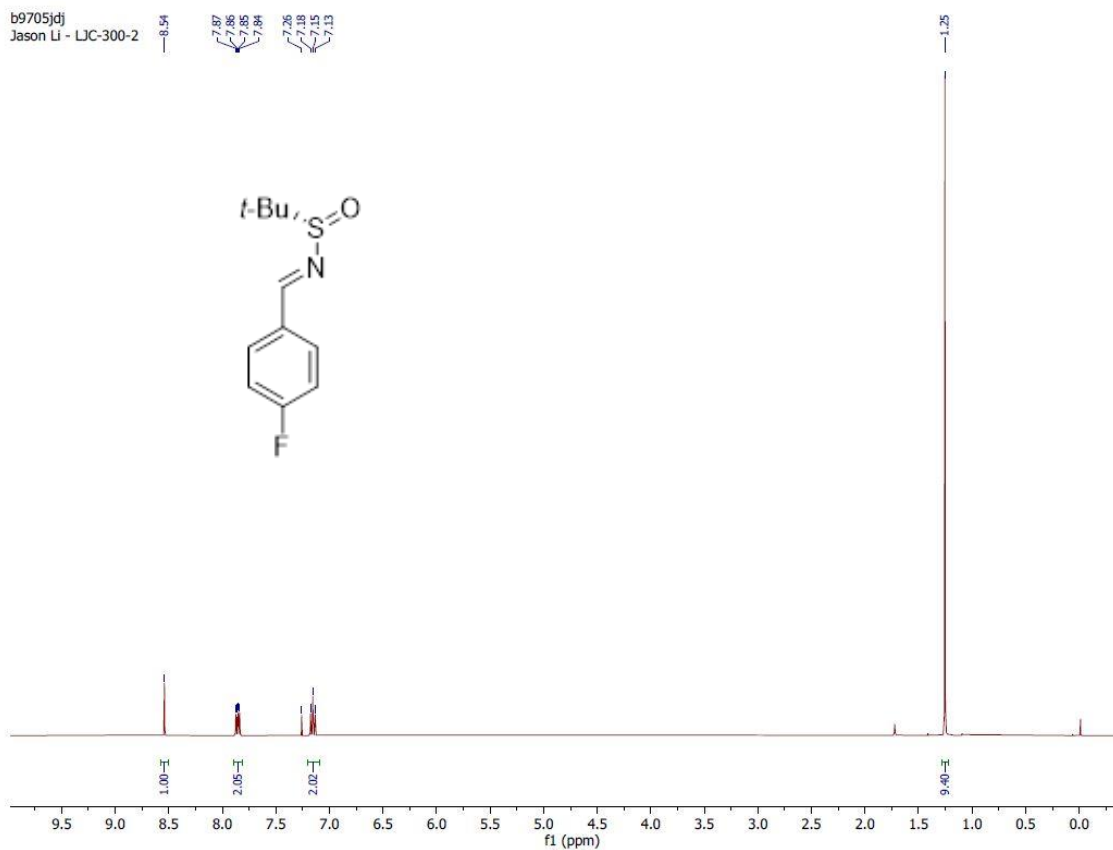

b9705jdj  
Jason Li - LIC-300-2

166.61  
164.98  
161.43  
131.67  
131.59  
130.62  
130.59  
116.41  
116.19  
77.43  
77.11  
76.79  
57.87  
22.67

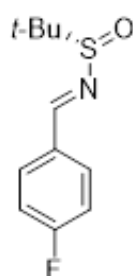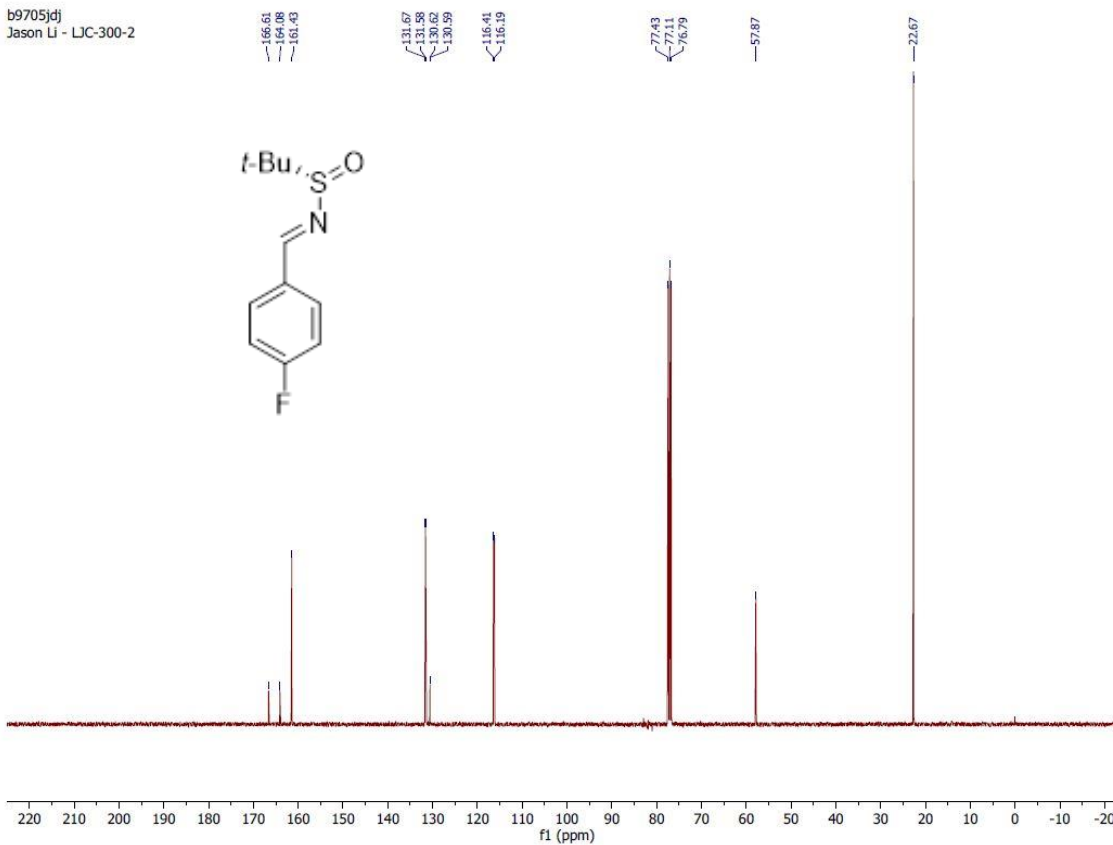

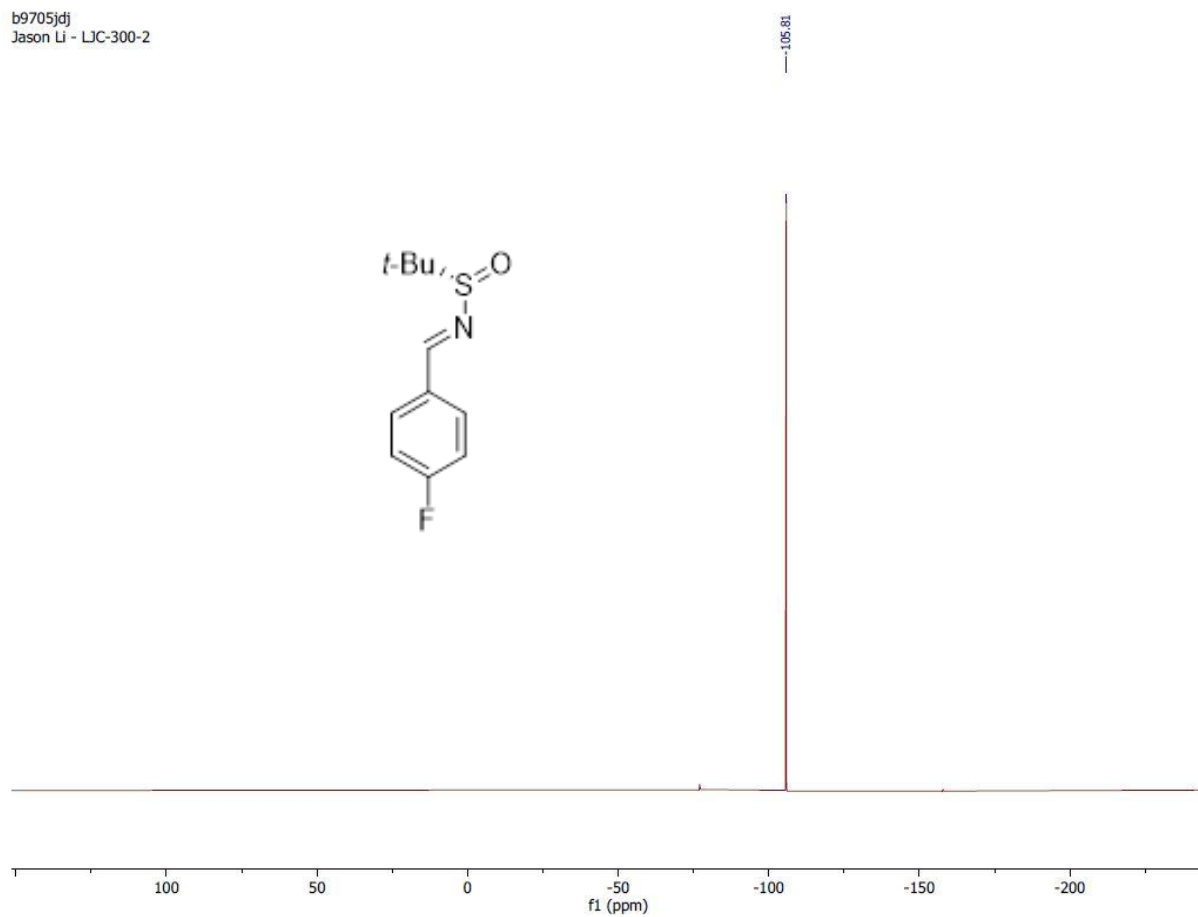

# Data for (*S*)-13c

b9315jdj  
Jason Li - LJC-297-P

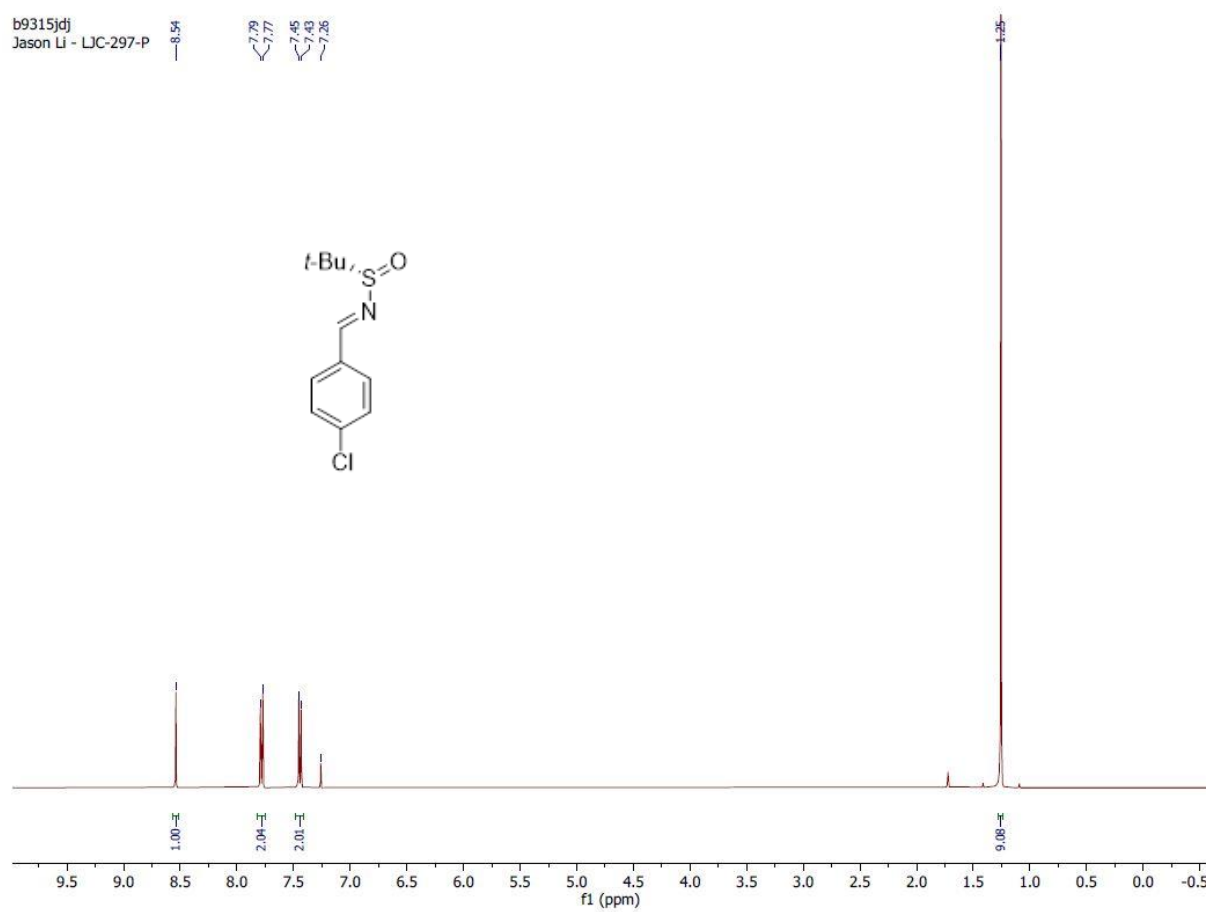

b9315jdj  
Jason Li - LJC-297-P

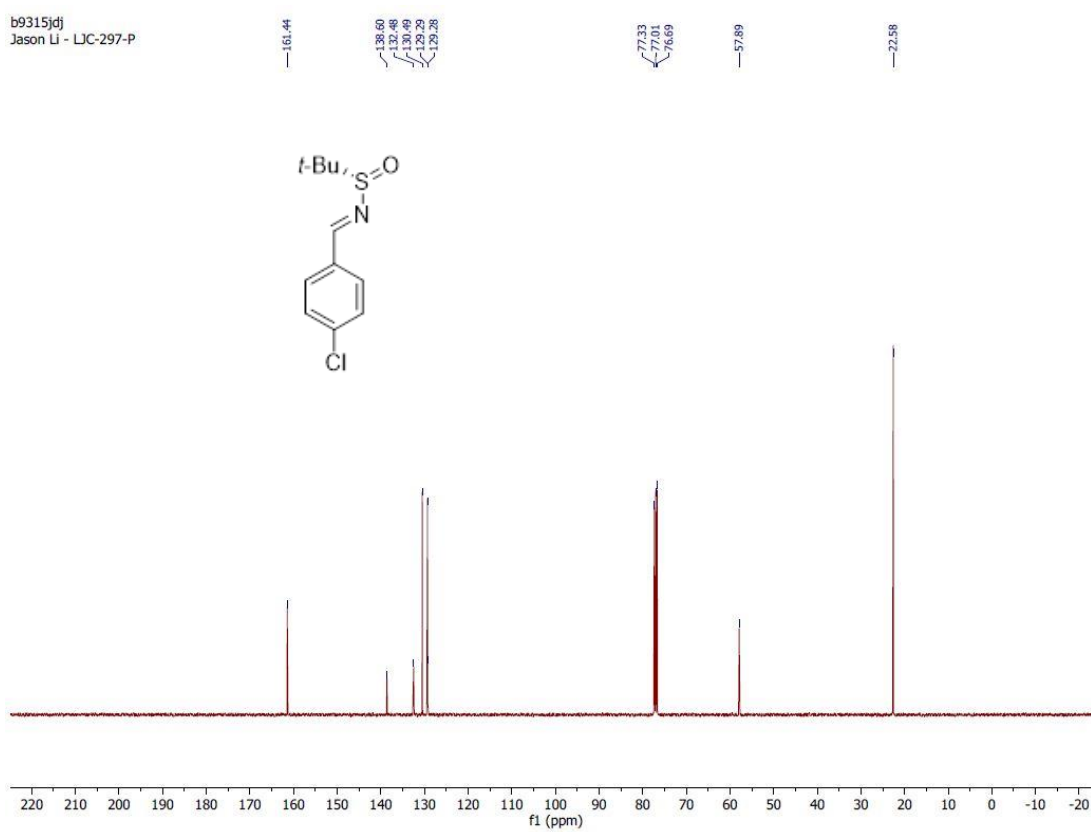



# Data for (*S*)-13d

b9998jdj  
Jason Li - LJC-315-1

8.53  
7.79  
7.70  
7.62  
7.60  
7.26

1.26

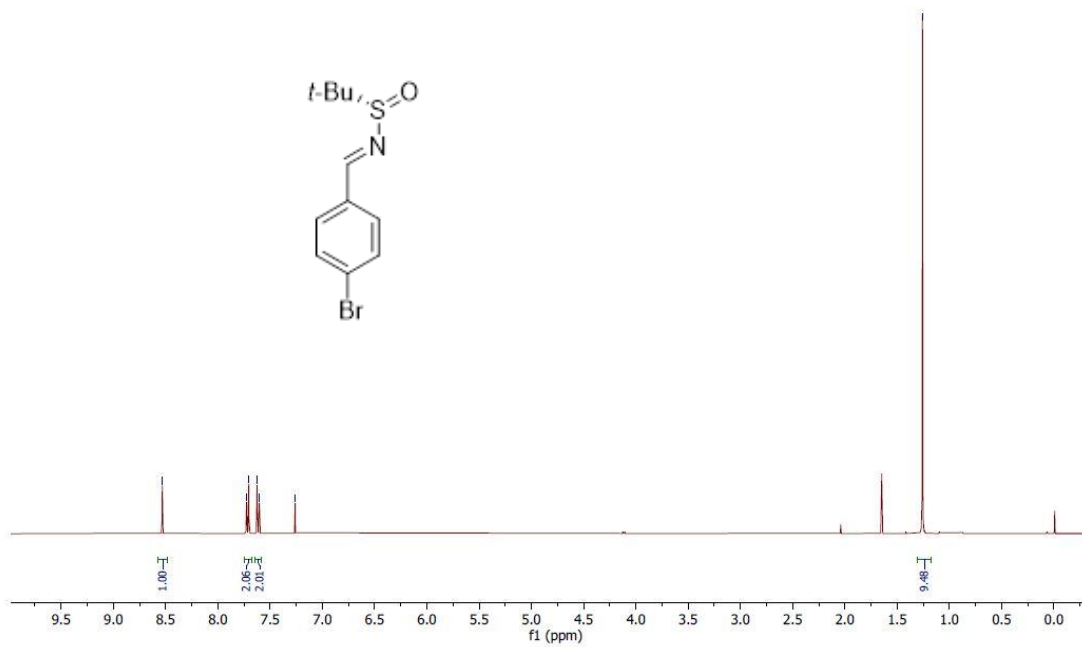

n0808jdj  
Jason Li - LJC-315-1

161.71  
132.98  
132.38  
130.75  
127.32

77.43  
77.11  
76.79

58.01

22.70

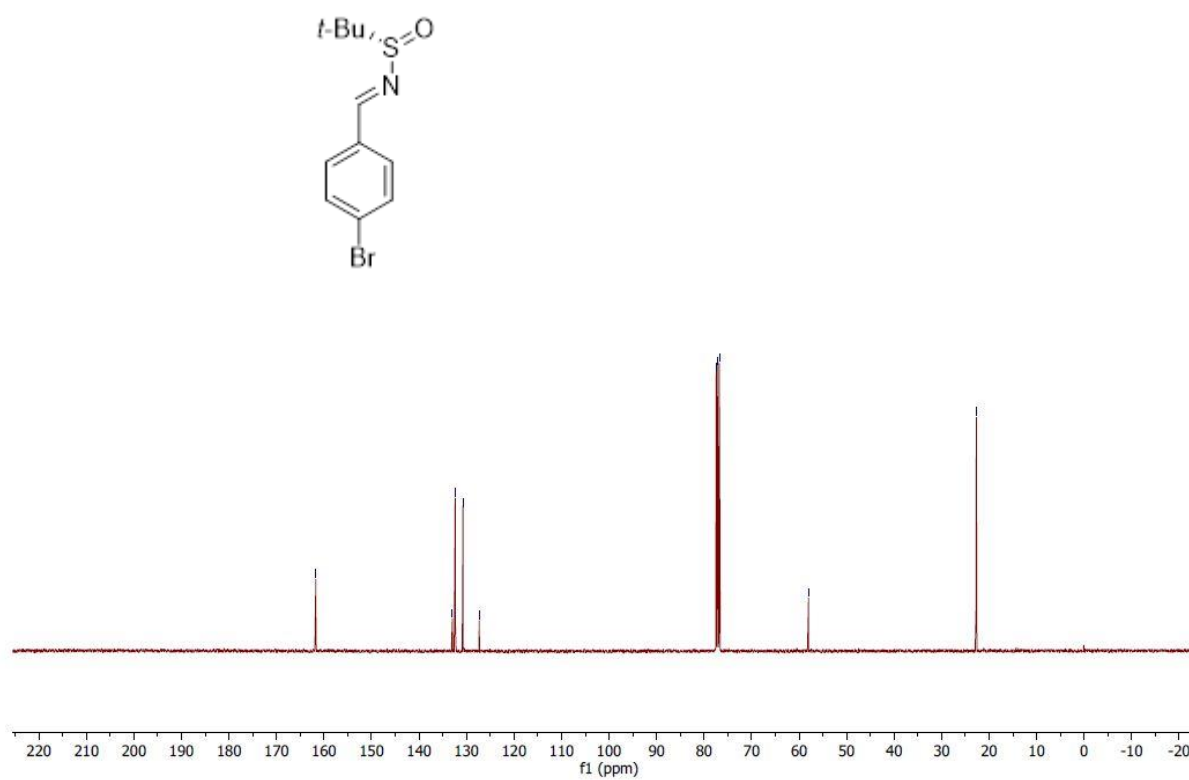

# Data for (*S*)-13e

b9999jdj  
Jason Li - LIC-315-2

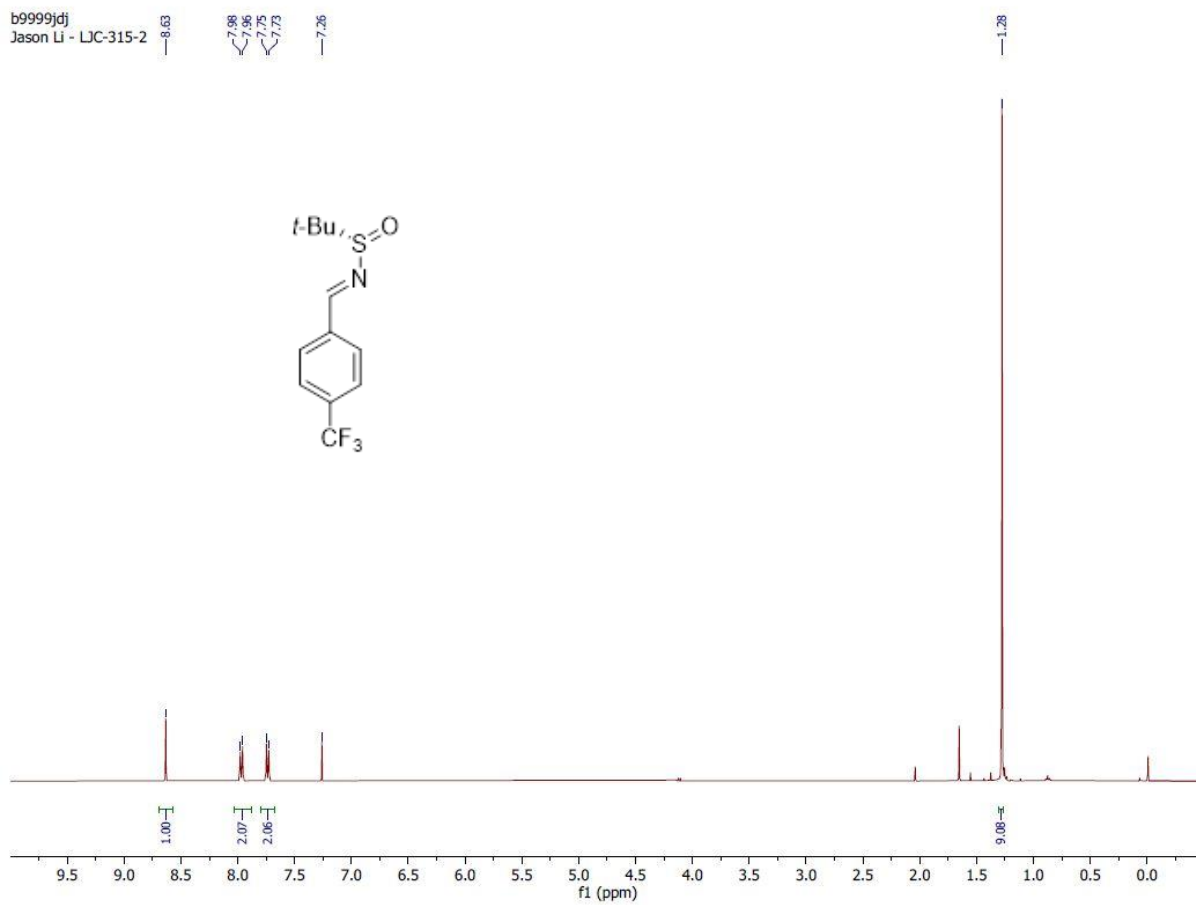

n0809jdj  
Jason Li - LIC-315-2

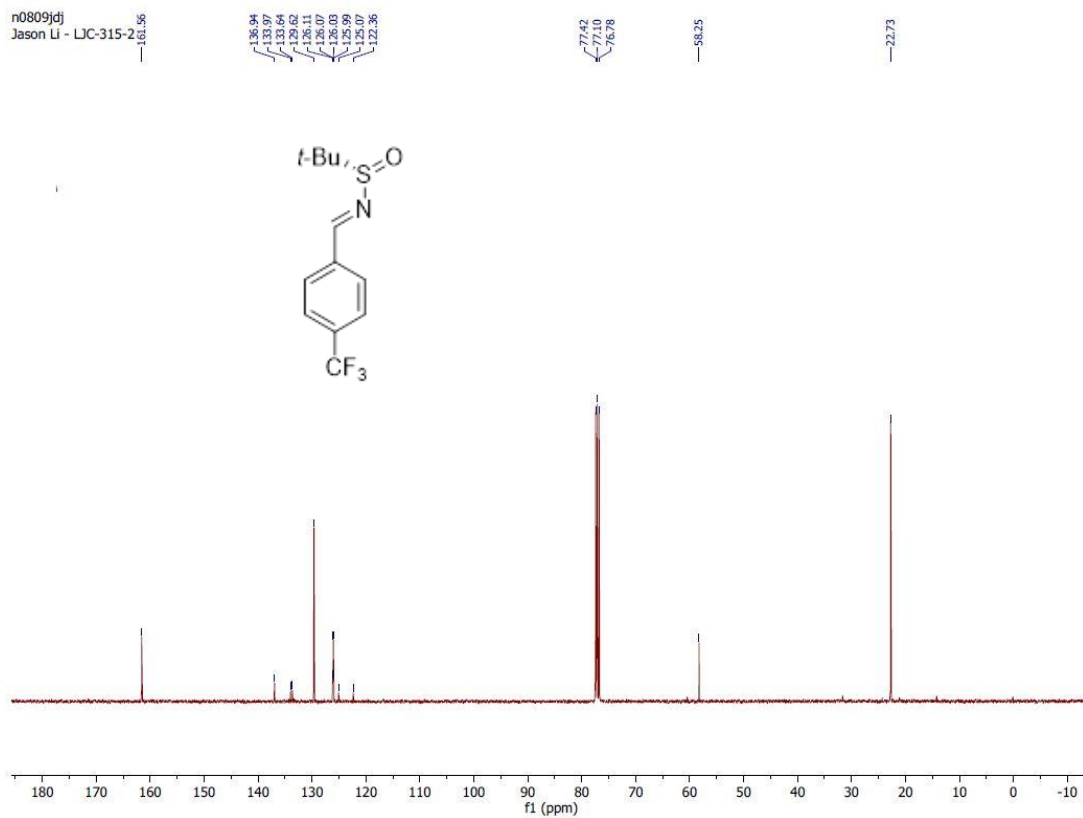

n0809jdj  
Jason Li - LIC-315-2

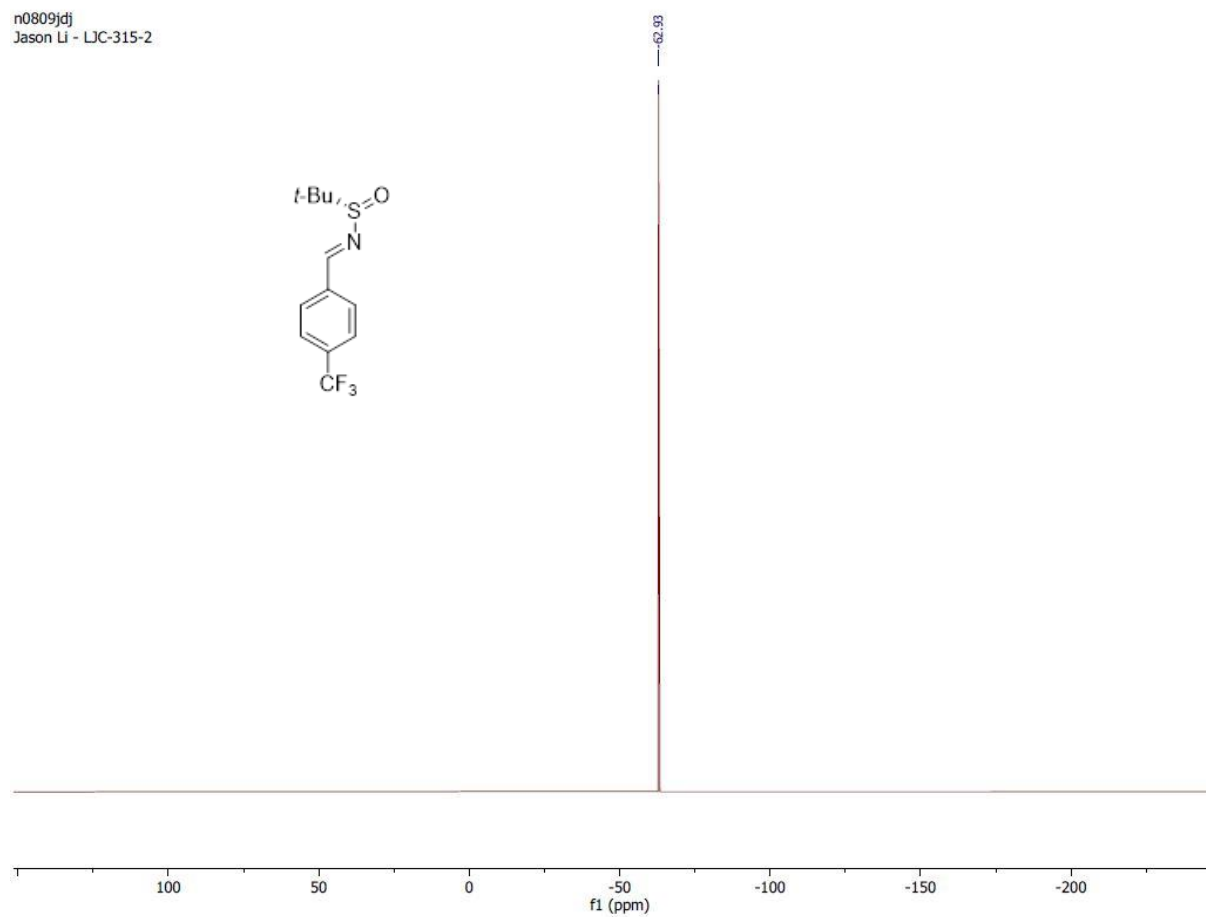

# Data for (*S*)-13f

b9196jdj  
Jason Li - LJC-291-1

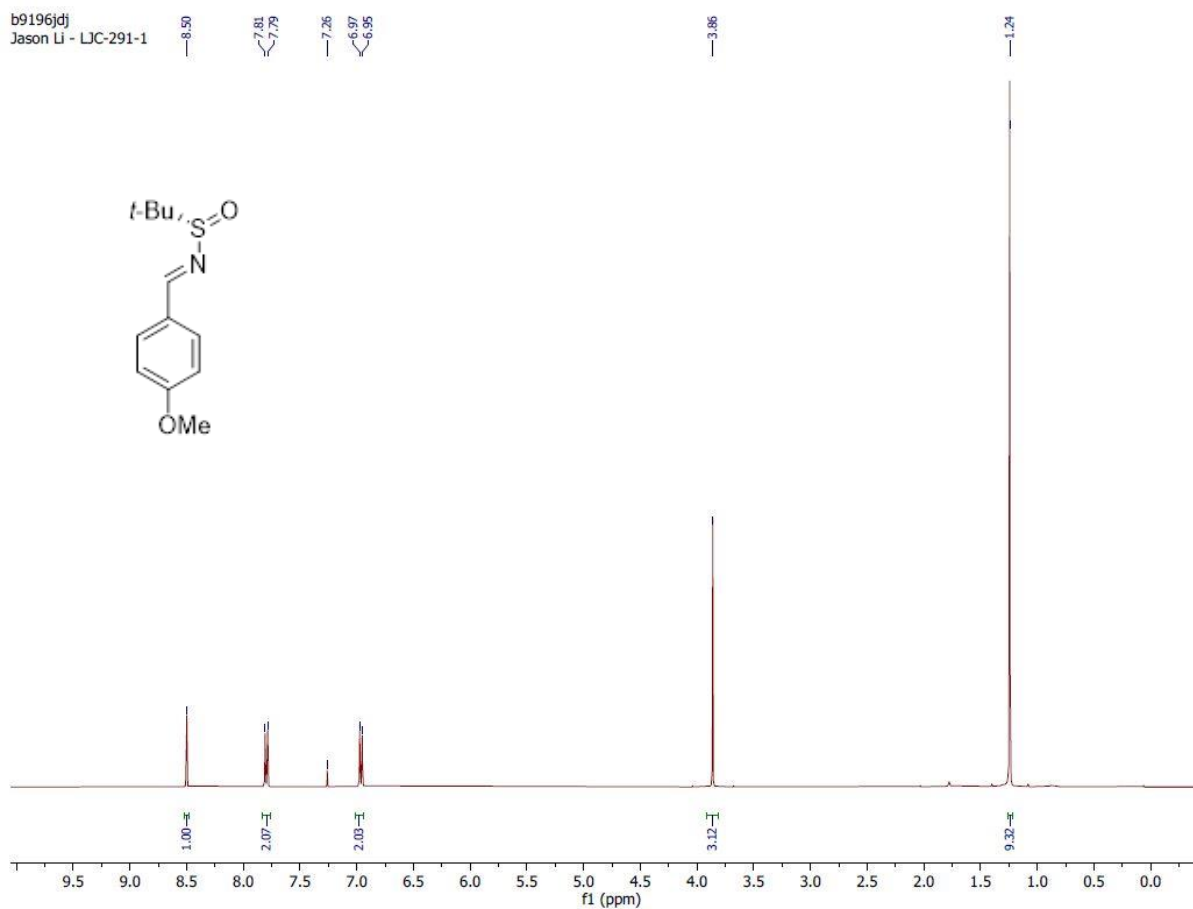

b9196jdj  
Jason Li - LJC-291-1

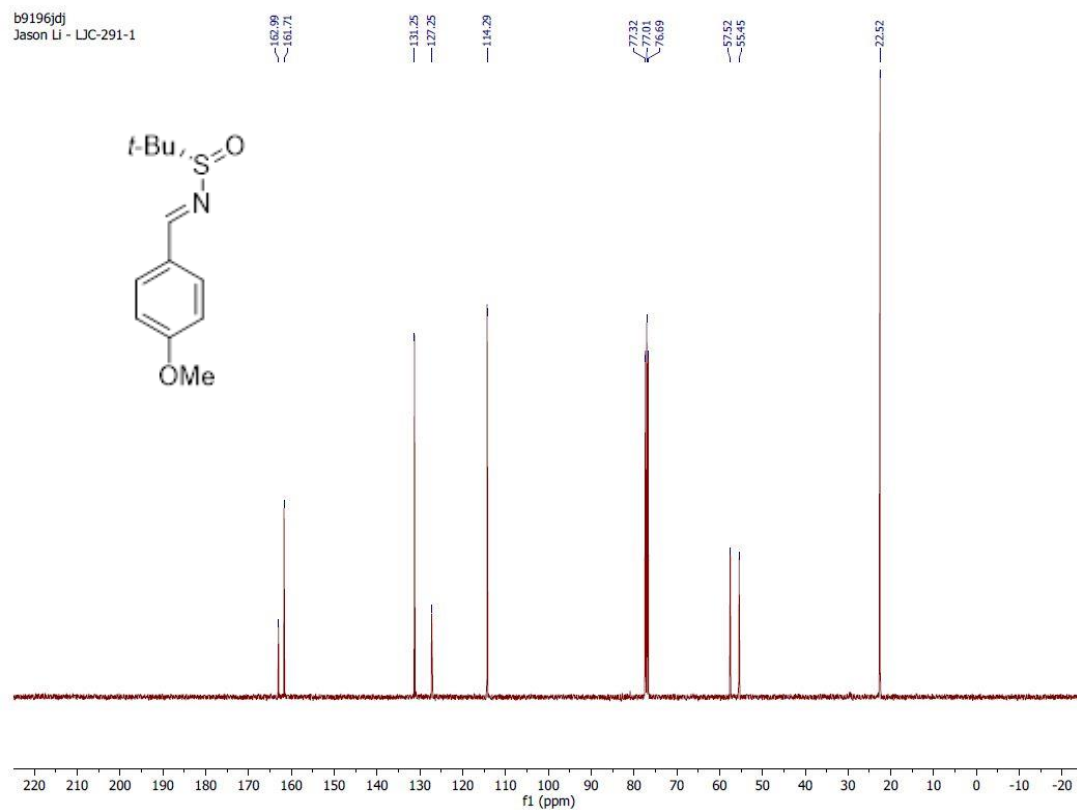

# Data for (*S*)-13g

b9279jdj  
Jason Li - LJC-294-1

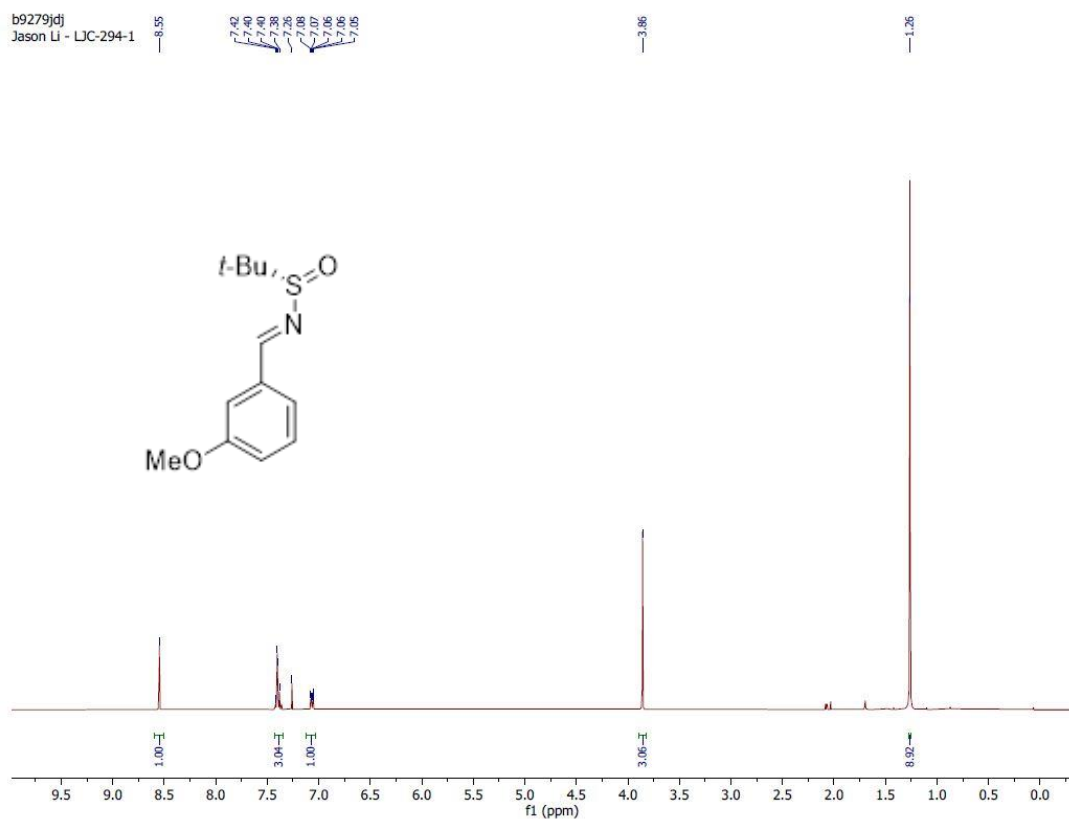

b9279jdj  
Jason Li - LJC-294-1

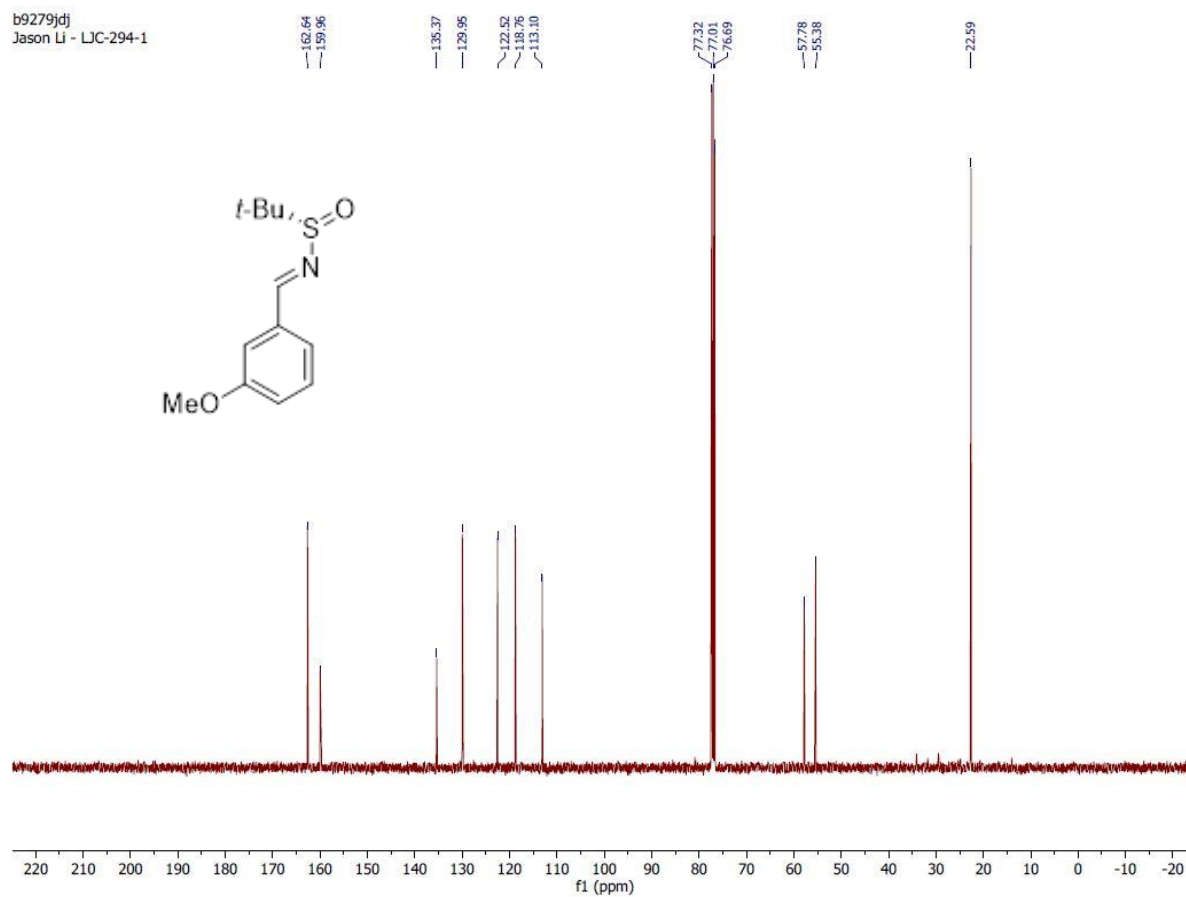

# Data for (*S*)-13h

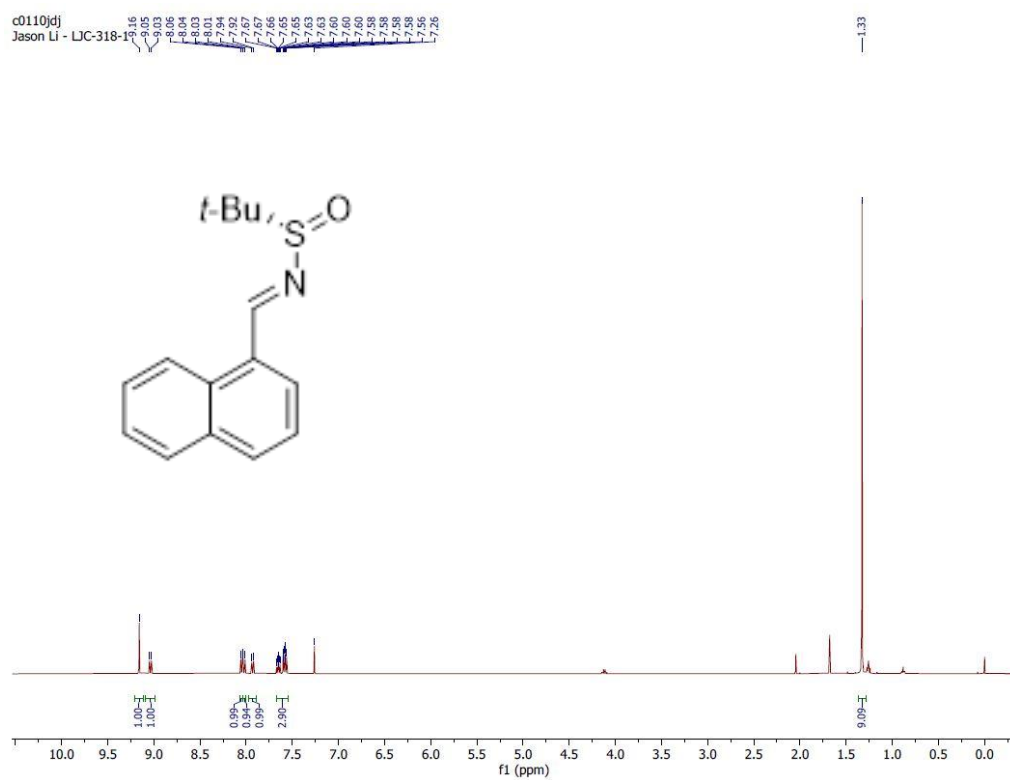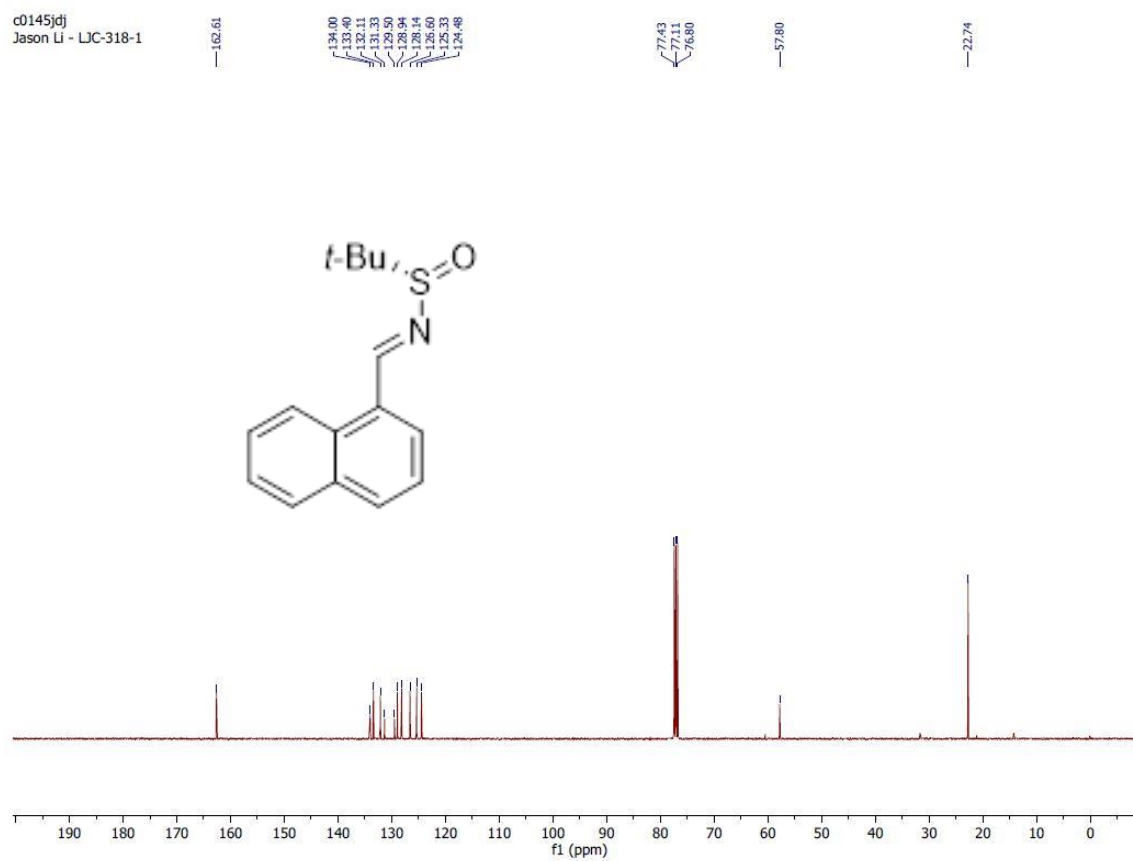

# Data for (*S*)-13i

c0212jdj  
Jason Li - LJC-321-2

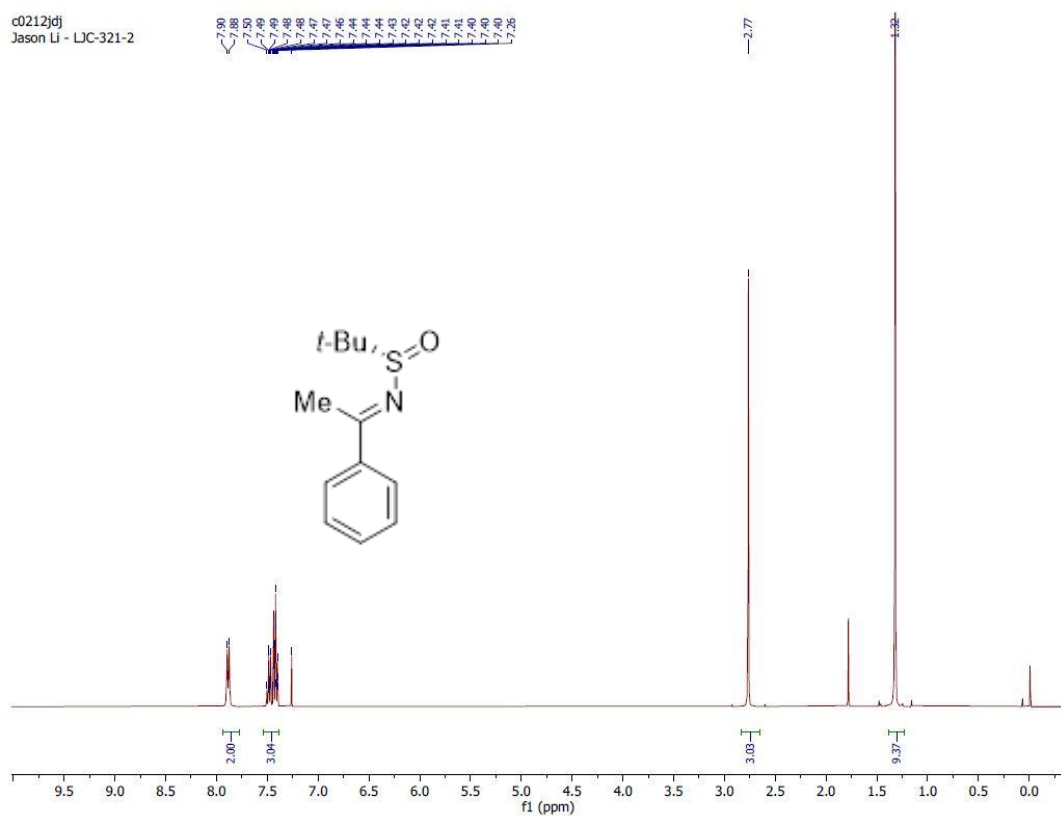

c0235jdj  
Jason Li - LJC-321-2

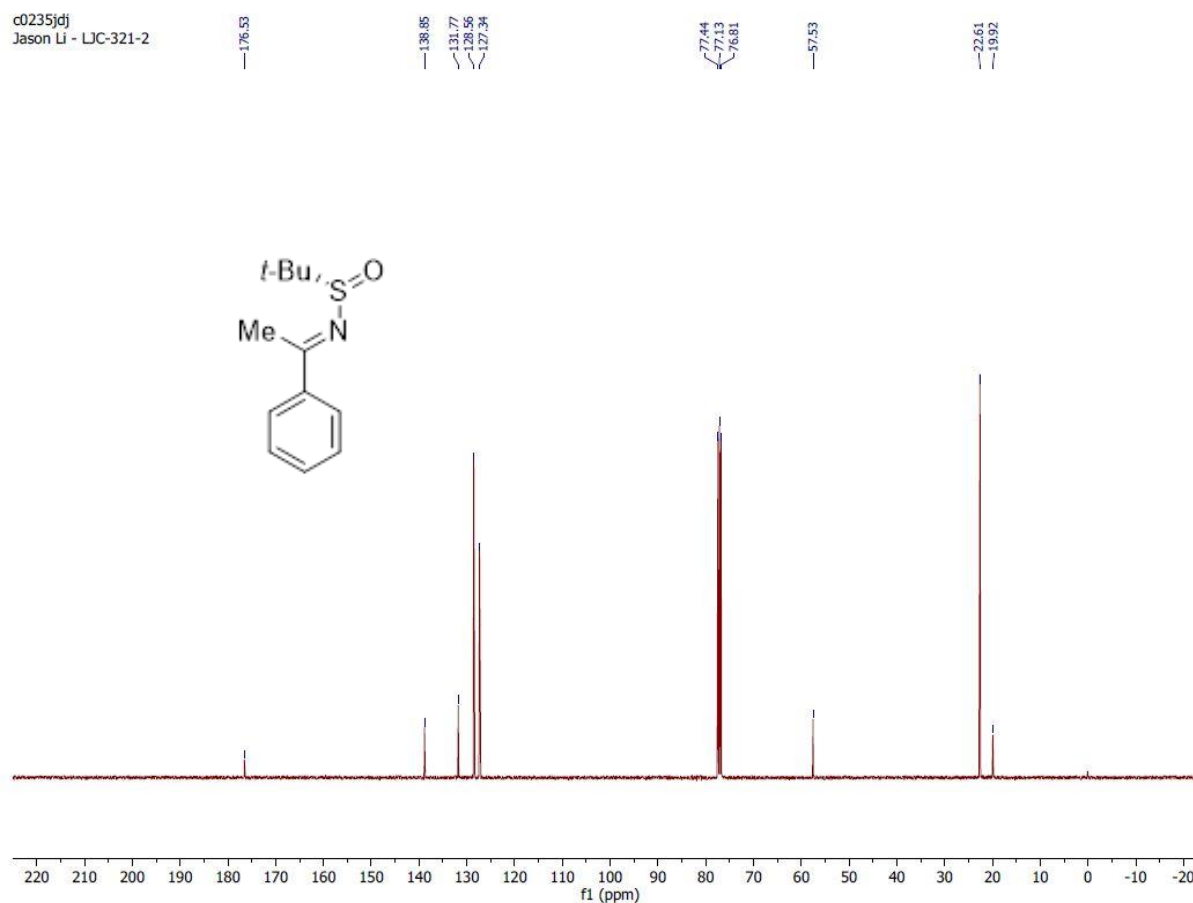

# Data for (*S*)-13k

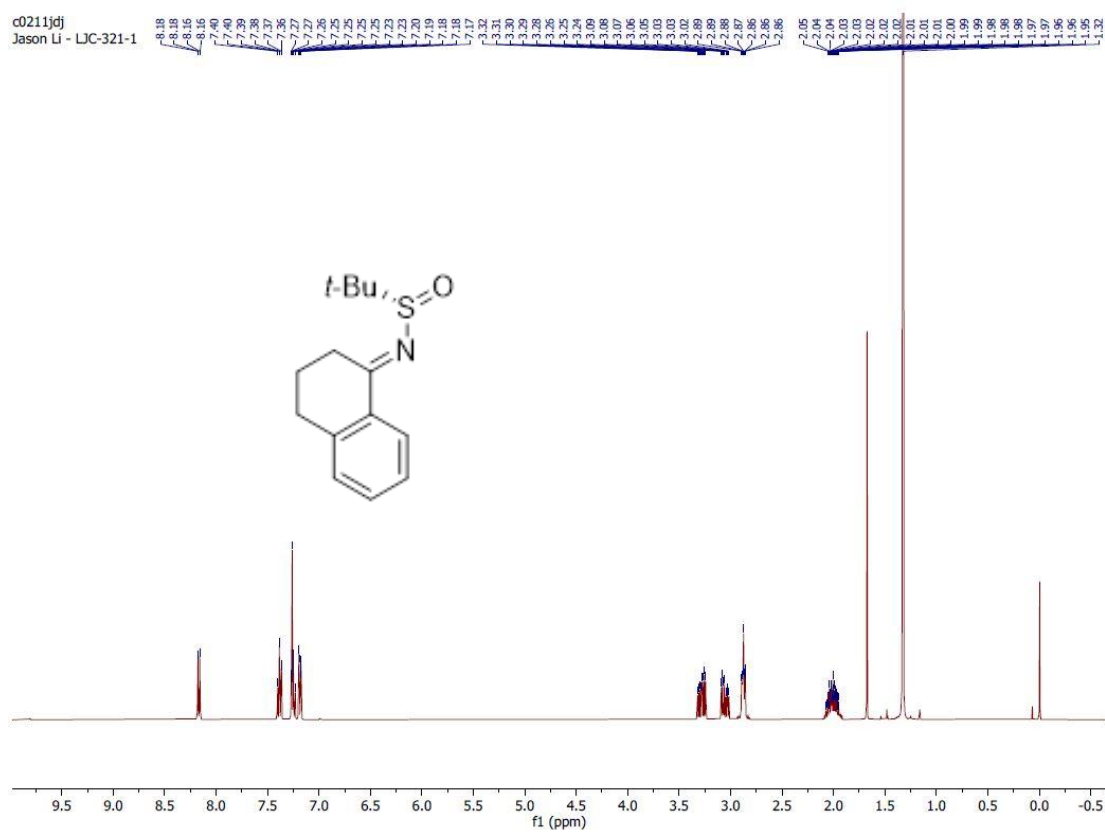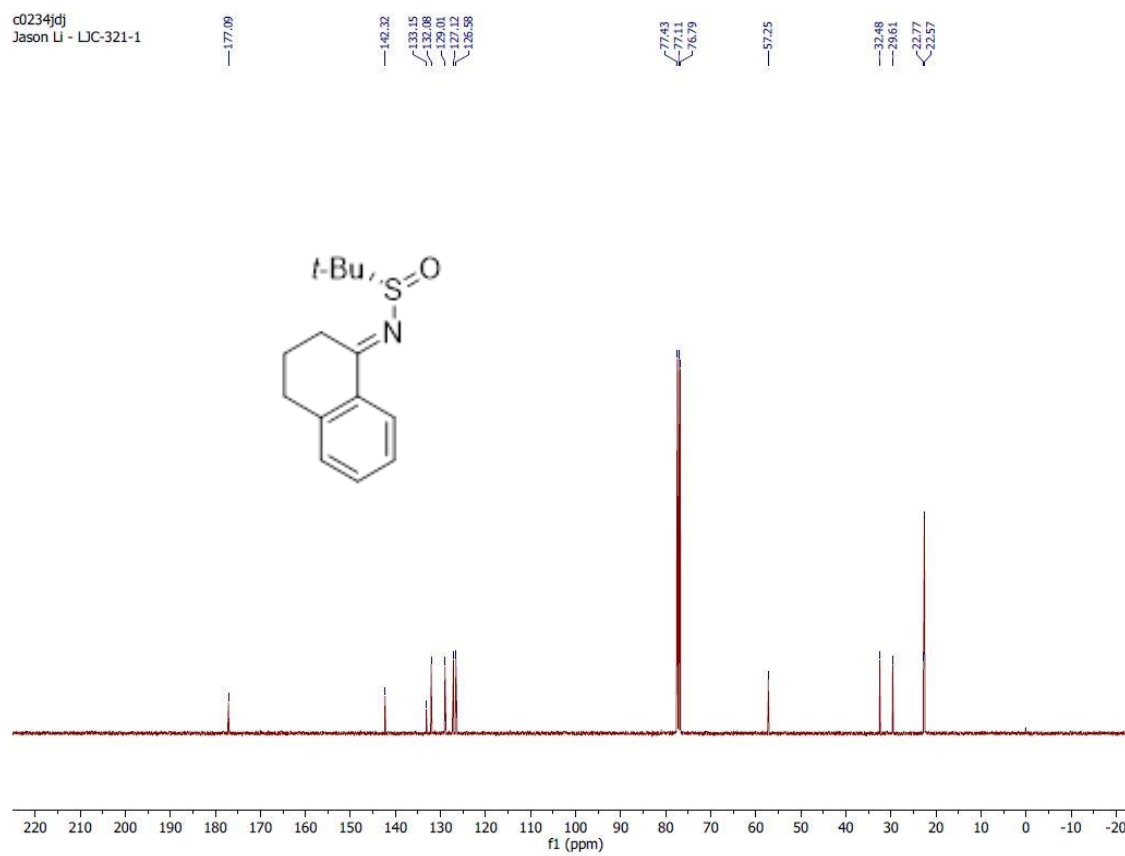



# Data for (*S*)-13I

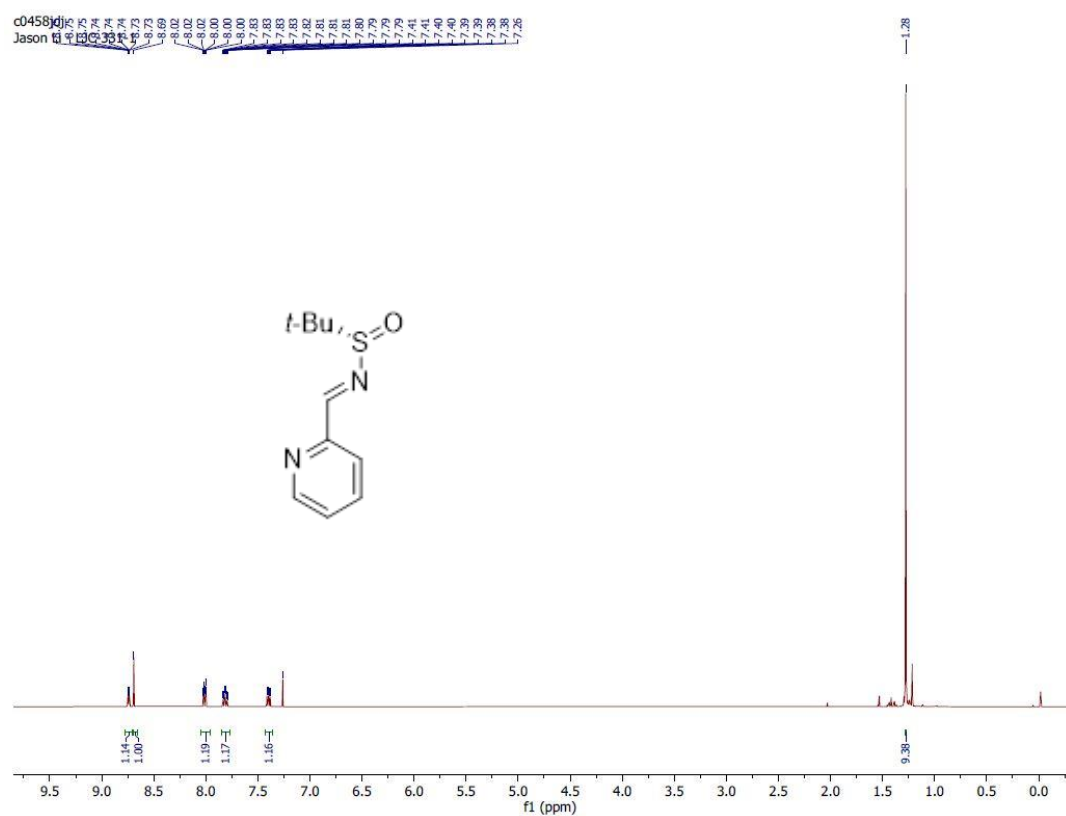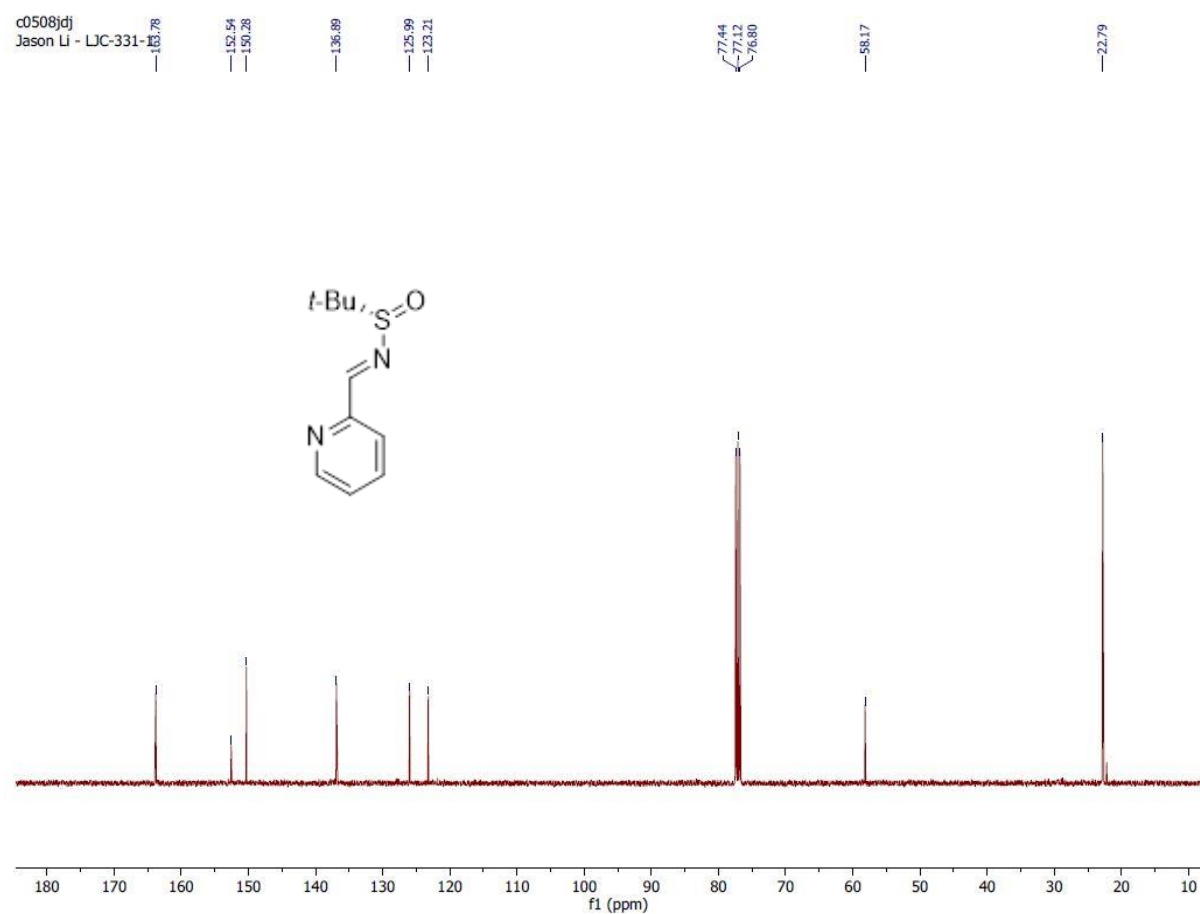

# Data for (*S*)-13m

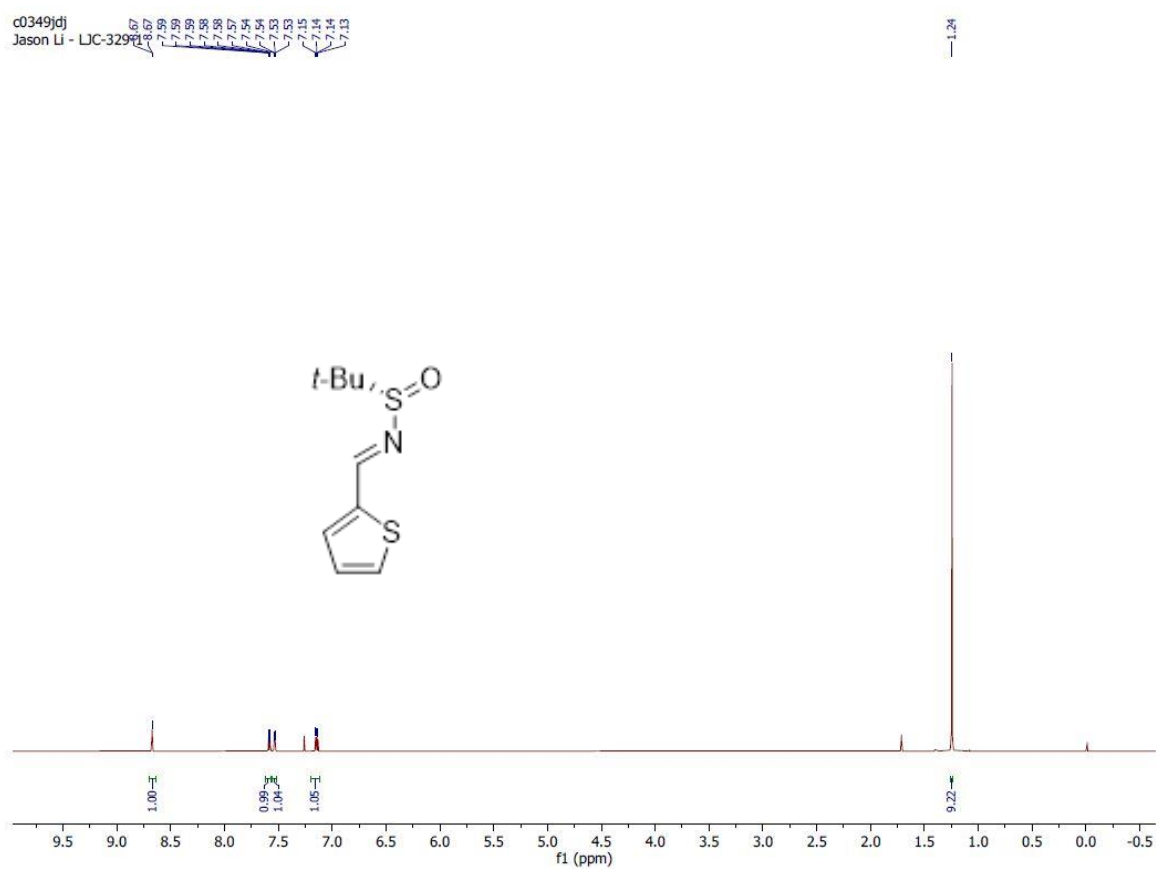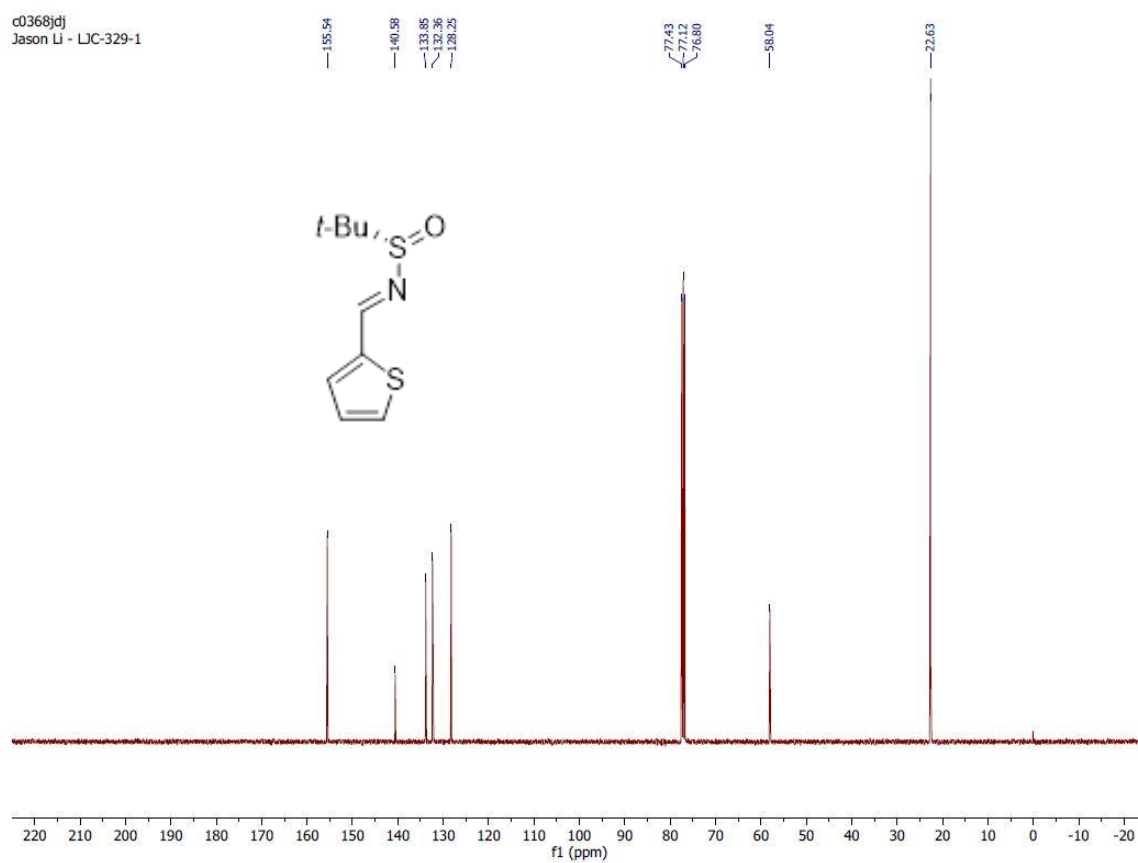

# Data for (*S*)-13n

b9754jdj  
Jason Li - LJC-303-1

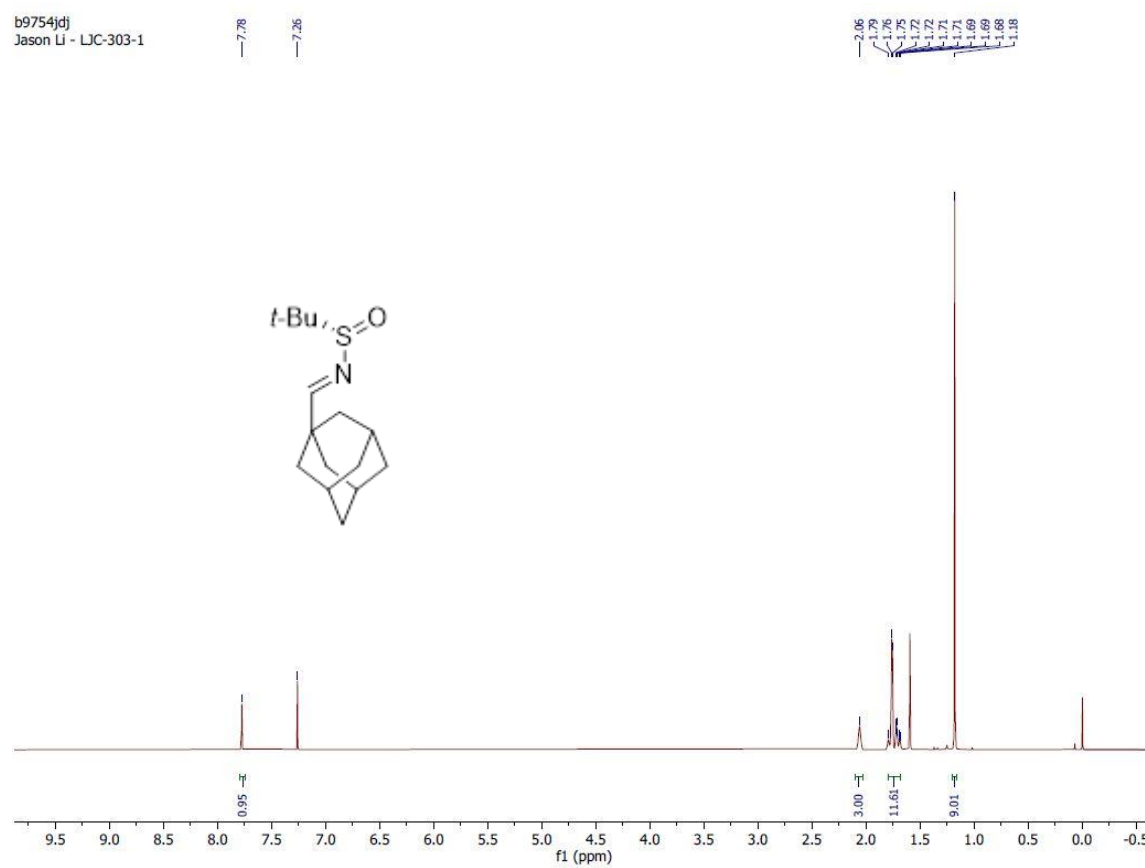

b9754jdj  
Jason Li - LJC-303-1

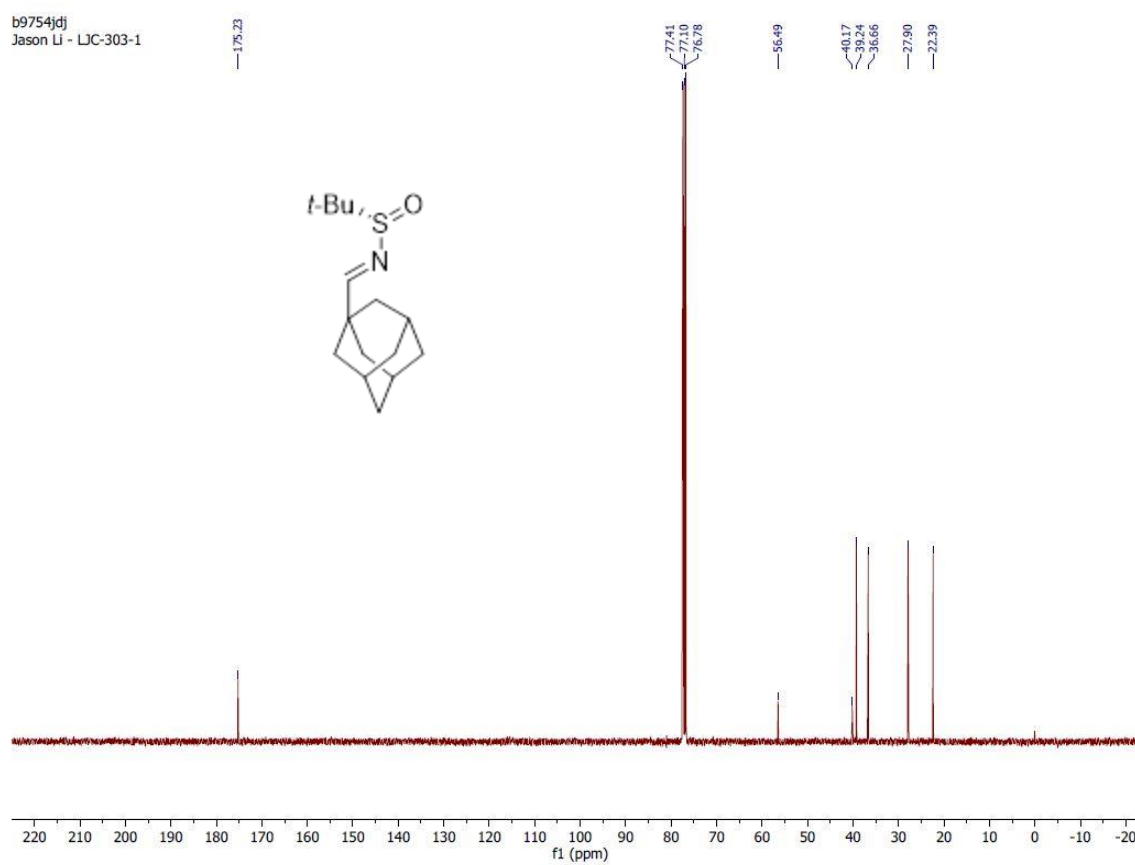

# Data for 16

c0715jdj  
Jason Li - LIC-336-2

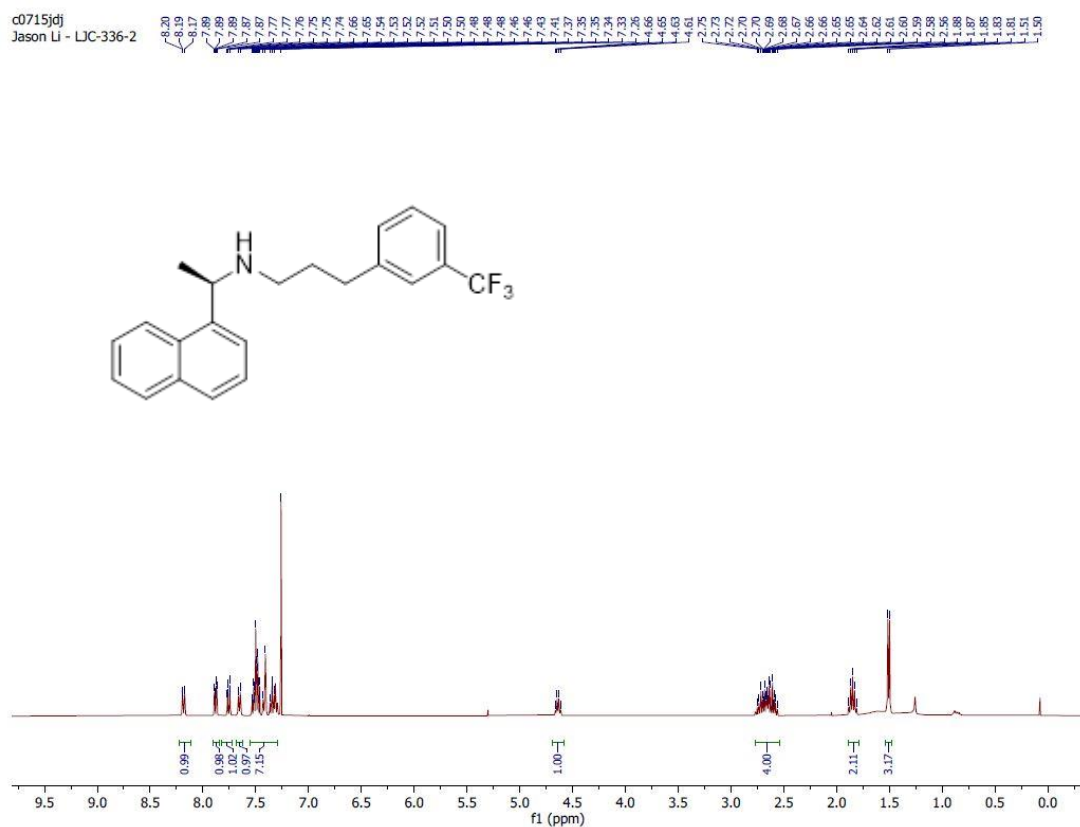

c0740jdj  
Jason Li - LIC-336-2

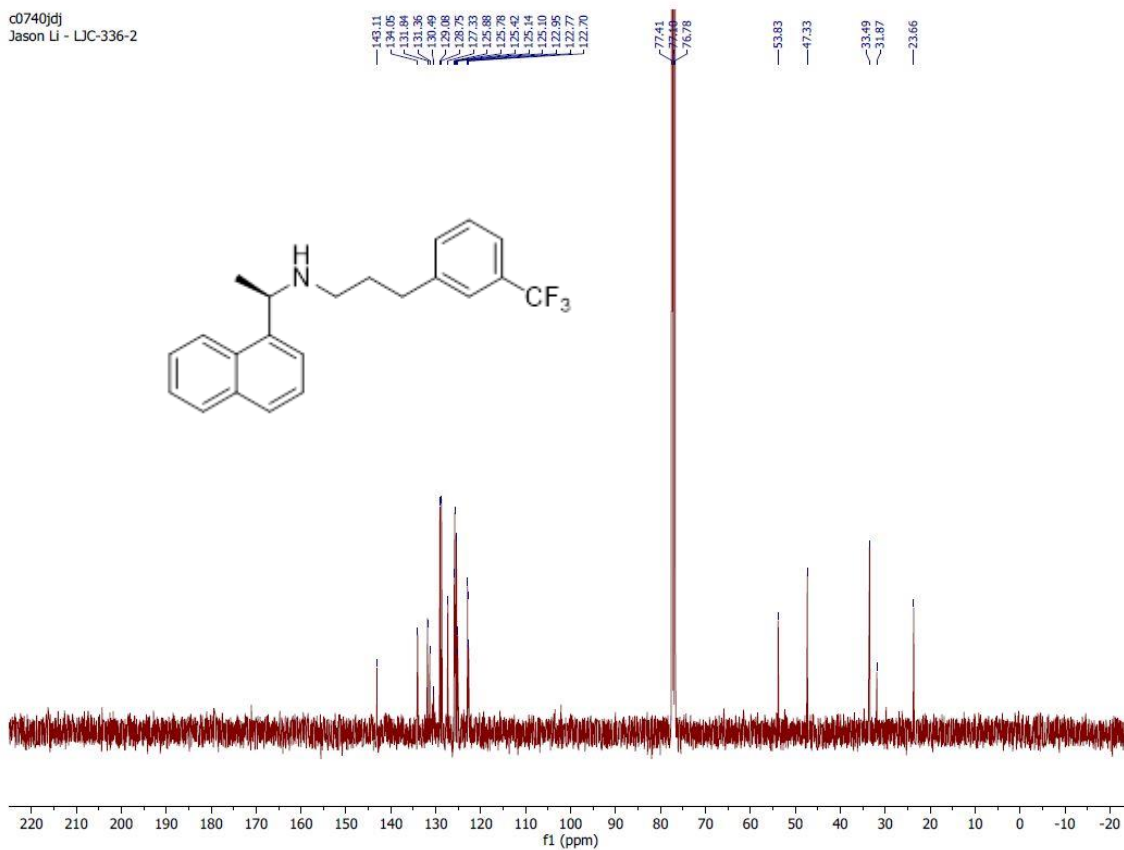

c0715jdj  
Jason Li - LJC-336-2

62.43

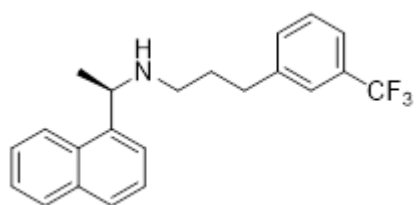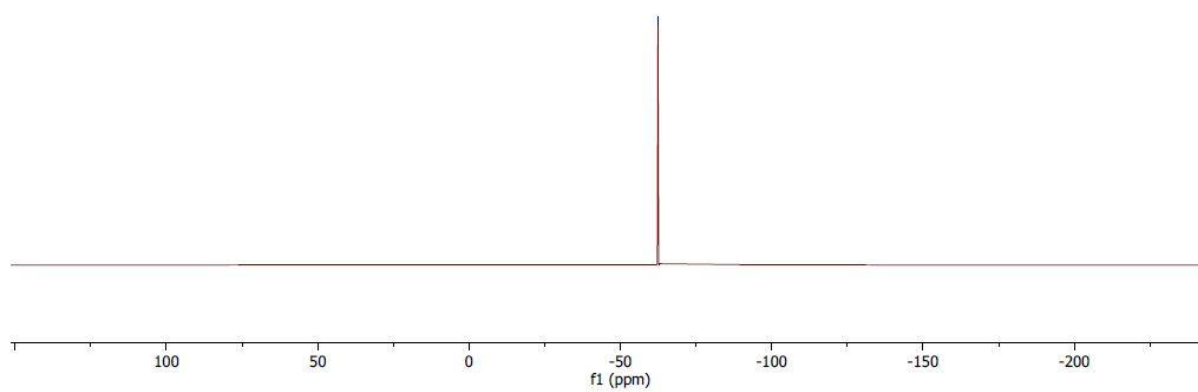

# Data for **18**

n8719jdj  
Jason Li - LJC-346-E

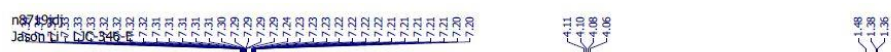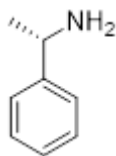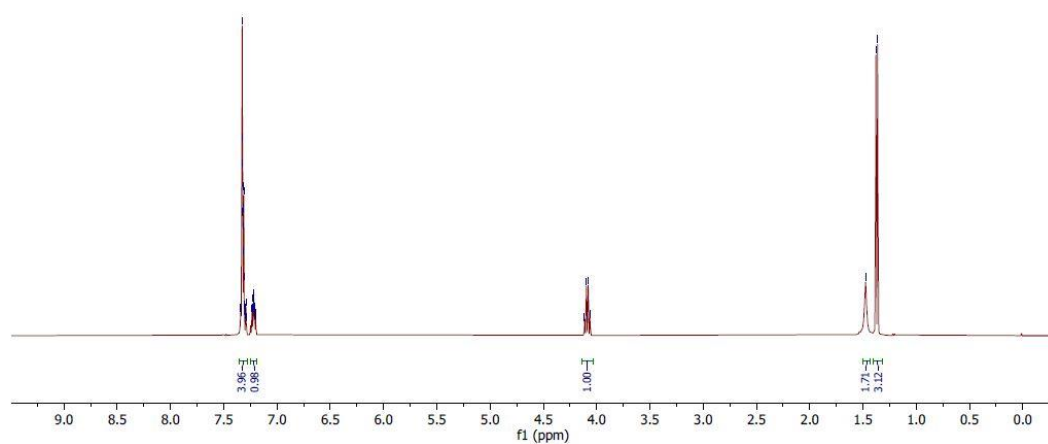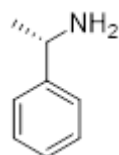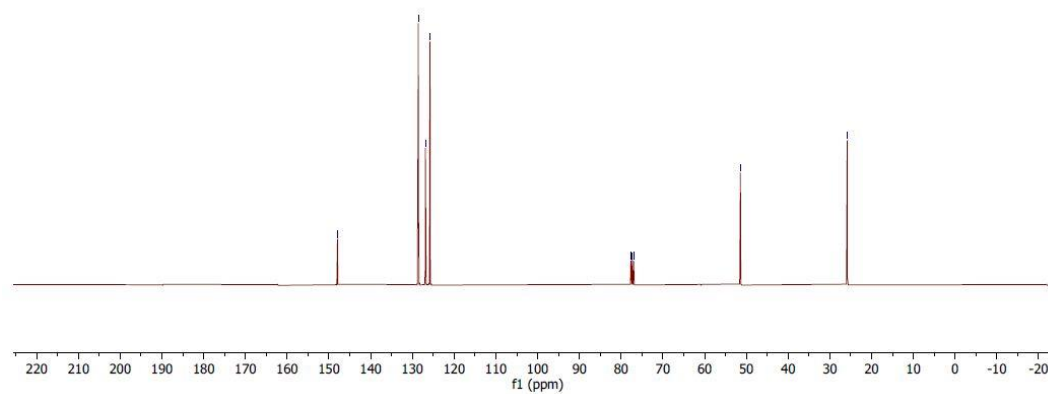

## **8) References**

- [1] Mancheño, O. G., Bolm, C. Synthesis of *N*-(1*H*)-Tetrazole Sulfoximines. *Org. Lett.* **9**, 2951–2954 (2007).
- [2] Kawęcki, R. Synthesis of *N*-Sulfenylimines from Disulfides and Primary Methanamines. *J. Org. Chem.* **87**, 7514–7520 (2022).
- [3] Liu, T.-F., Yao, Y., Lu, C.-D. Enantioselective Formation of  $\alpha$ -Amino Acid Derivatives via [2,3]-Sigmatropic Rearrangement of *N*-Acyl Iminosulfinamides. *Org. Lett.* **25**, 4156–4161 (2023).
- [4] Davis, F. A., Friedman, A. J., Nadir, U. K. Chemistry of the sulfur-nitrogen bond. 14. Arenesulfenic acids from *N*-alkylidenearenesulfinamides (sulfinimines). *J. Am. Chem. Soc.* **100**, 2844–2852 (1978).
- [5] Hendriks, C. M. M., Lamers, P., Engel, J., Bolm, C. Sulfoxide-to-Sulfilimine Conversions: Use of Modified Burgess-Type Reagents. *Adv. Synth. Catal.* **355**, 3363–3368 (2013).
- [6] Klein, M., Waldvogel, S. R. Anodic Dehydrogenative Cyanamidation of Thioethers: Simple and Sustainable Synthesis of *N*-Cyanosulfilimines. *Angew. Chem. Int. Ed.* **60**, 23197–23201 (2021).
- [7] Goldberg, F. W., Kettle, J. G., Xiong, J., Lin, D. General synthetic strategies towards *N*-alkyl sulfoximine building blocks for medicinal chemistry and the use of dimethylsulfoximine as a versatile precursor. *Tetrahedron.* **70**, 6613–6622 (2014).
- [8] Barry, N., Brondel, N., Lawrence, S. E., Maguire, A. R. Synthesis of aryl benzyl NH Sulfoximines. *Tetrahedron.* **65**, 10660–10670 (2009).
- [9] Kim, S., Kim, J. E., Lee, J., Lee, P.H. *N*-Imidazolylolation of Sulfoximines from *N*-Cyano Sulfoximines, 1-Alkynes, and *N*-Sulfonyl Azides. *Adv. Synth. Catal.* **357**, 3707–3717 (2015).

- [10] Dannenberg, C. A., Fritze, L., Krauskopf, F., Bolm, C. Access to *N*-cyanosulfoximines by transition metal-free iminations of sulfoxides. *Org. Biomol. Chem.* **15**, 1086–1090 (2017).
- [11] Reddy, C. M. L., Khan, F. R. N., Saravanan, V. Facile. Synthesis of *N*-1,2,4-oxadiazole Substituted Sulfoximines from *N*-cyano Sulfoximines. *Org. Biomol. Chem.* **17**, 9187 (2019).
- [12] Amri, N., Wirth, T. Flow electrosynthesis of Sulfoxides, Sulfones, and Sulfoximines without Supporting Electrolytes. *J. Org. Chem.* **86**, 15961–15972 (2021).
- [13] Dong, S., Frings, M., Cheng, H., Wen, J., Zhang, D., Raabe, G., Bolm, C. Organocatalytic Kinetic Resolution of Sulfoximines *J. Am. Chem. Soc.* **138**, 2166–2169 (2016).
- [14]. Li, R., Zhou F., Huang X., Zhao J., Zhang H. Pummerer-like Rearrangement Induced Cascade Reactions: Synthesis of Highly Functionalized Imidazoles. *J. Org. Chem.* **88**, 739–744 (2023).
- [15] Roe, C., Hobbs, H., Stockman, R. A. Multicomponent Synthesis of Chiral Sulfinimines. *Chem. Eur. J.* **17**, 2704–2708 (2011).
- [16] Fernández, I., Valdivia, V., Alcudia, A., Chelouan, A., Khiar, N. Enantiodivergent Approach to Trifluoromethylated Amines: A Concise Route to Both Enantiomeric Analogues of Calcimimetic NPS R-568. *Eur. J. Org. Chem.* **2010**, 1502–1509 (2010).
- [17] Petrone, D. A., Yoon H., Weinstabl H., Lautens M. Additive Effects in the Palladium-Catalyzed Carboiodination of Chiral *N*-Allyl Carboxamides. *Angew. Chem. Int. Ed.* **53**, 7908–7912 (2014).
- [18] Ramaiah, M. M., Shubha, P. B., Prabhala, P. K., Shivananju, N. S. 1,8-Diazabicyclo[5.4.0]undec-7-ene-mediated formation of *N*-sulfinyl imines. *J. Chem. Res.* **44**, 72–79 (2020).
- [19] Reeves, J. T., Visco, M. D., Marsini, M. A., Grinberg, N., Busacca, C. A., Mattson, A. E., Senanayake, C. H. A General Method for Imine Formation Using B(OCH<sub>2</sub>CF<sub>3</sub>)<sub>3</sub>. *Org. Lett.* **17**, 2442–2445 (2015).



- [20] Kells, K. W, Chong, J. M. Stille Coupling of Stereochemically Defined  $\alpha$ -Sulfonamidoorganostannanes. *J. Am. Chem. Soc.* **126**, 15666–15667 (2004).
- [21] Sanaboina, C., Jana, S., Eppakayala, L. Efficient Microwave-Assisted Synthesis of *N*-(tert-Butylsulfinyl)imines Catalyzed by Amberlist-15. *Synlett.* **25**, 1006–1008 (2014).
- [22] Vazquez-Chavez, J., Luna-Morales, S., Cruz-Aguilar, D. A., Díaz-Salazar, H., Vallejo Narváez W. E., Silva-Gutiérrez, R. S. *et al.* The effect of chiral *N*-substituents with methyl or trifluoromethyl groups on the catalytic performance of mono- and bifunctional thioureas. *Org. Biomol. Chem.* **17**, 10045–10051 (2019).
- [23] Sirvent, J. A., Foubelo, F., Yus, M. Diastereoselective indium-mediated allylation of *N*-tert-butanefulfinyl ketimines: easy access to asymmetric quaternary stereocenters bearing nitrogen atoms. *Chem. Commun.* **48**, 2543–2545 (2012).
- [24] Alexeev, M. S., Strelkova, T. V., Ilyin, M. M., Nelyubina, Y. V., Bepalov, I. A., Medvedev, M. G. *et al.* Amine adducts of triallylborane as highly reactive allylborating agents for Cu(i)-catalyzed allylation of chiral sulfinylimines. *Org. Biomol. Chem.* **22**, 4680–4696 (2024).
- [25] Wang, L., Chen, M., Zhang, P., Li, W., Zhang, J. Palladium/PC-Phos-Catalyzed Enantioselective Arylation of General Sulfenate Anions: Scope and Synthetic Applications. *J. Am. Chem. Soc.* **140**, 3467–3473 (2018).
- [26] WO2017006282A1·2017-01-12.
- [27] US2008261926A1·2008-10-23.
- [28] Arava, V. R., Gorentla, L., Dubey, P. K. A novel asymmetric synthesis of cinacalcet hydrochloride. *Beilstein J. Org. Chem.* **8**, 1366–1373 (2012).
- [29] Bottari, G., Afanasenko, A., Castillo-Garcia, A. A., Feringa, B. L., Barta, K. Synthesis of Enantioenriched Amines by Iron-Catalysed Amination of Alcohols Employing at Least One Achiral Substrate. *Adv. Synth. Catal.* **363**, 5436–5442 (2021).

- [30] Adamkiewicz, A., Mlynarski, J. Diastereoselective Hydrosilylation of *N*-(tert-Butylsulfinyl)imines Catalyzed by Zinc Acetate. *Eur. J. Org. Chem.* **2016**, 1060–1065 (2016).
- [31] Bonfield, H. E., Mercer, K., Diaz-Rodriguez, A., Cook, G. C., McKay, B. S. J., Slade, P., Taylor, G. M., Ooi, W. X., Williams, J. D., Roberts, J. P. M., et al. (2020). The Right Light: De Novo Design of a Robust Modular Photochemical Reactor for Optimum Batch and Flow Chemistry. *ChemPhotoChem* 4, 45-51. 10.1002/cptc.201900203.
- [32] Robinson, W. X. Q., Mielke, T., Melling, B., Cuetos, A., Parkin, A., Unsworth, W. P., *et al.* Comparing the Catalytic and Structural Characteristics of a ‘Short’ Unspecific Peroxygenase (UPO) Expressed in *Pichia pastoris* and *Escherichia coli*. *ChemBioChem.* **24**, e202200558 (2023).
- [33] Trott, O., Olson, A. J. AutoDock Vina: improving the speed and accuracy of docking with a new scoring function, efficient optimization, and multithreading. *J Comput Chem.* **31**, 455–461 (2010).
- [34] Moriarty, N. W., Grosse-Kunstleve, R. W., Adams, P. D. electronic Ligand Builder and Optimization Workbench (eLBOW): a tool for ligand coordinate and restraint generation. *Acta Crystallogr D Biol Crystallogr.* **65**, 1074–1080 (2009).
- [35] Liebschner D, Afonine PV, Baker ML, Bunkóczi G, Chen VB, Croll TI, *et al.* Macromolecular structure determination using X-rays, neutrons and electrons: recent developments in Phenix. *Acta Crystallogr D Struct Biol.* **75**, 861–877 (2019).
- [36] Ramirez-Escudero, M., Molina-Espeja, P., Gomez de Santos, P., Hofrichter, M., Sanz-Aparicio, J., Alcalde, M. Structural Insights into the Substrate Promiscuity of a Laboratory-Evolved Peroxygenase. *ACS Chem Biol.* **13**, 3259–3268 (2018).
- [37] Schlichting, I., Berendzen, J., Chu, K., Stock, A. M., Maves, S. A., Benson, D. E., *et al.* The Catalytic Pathway of Cytochrome P450cam at Atomic Resolution. *Science.* **287**, 1615–1622 (2000).
